# Supplementary material for: Structural organization and dynamics of FCHo2 docking on membranes
Source: eLife. 2022 Jan 19;11:e73156. doi: 10.7554/eLife.73156 (PMC8798043; doi:10.7554/eLife.73156)
Supplement: Figure 1—figure supplement 4—source data 1. [file elife-73156-fig1-figsupp4-data1.xlsx]

## Sheet: binding FCHo2
1	2	5
154.705	568.906	911.528
154.35	652.356	981.604
156.438	464.762	947.457
149.799	480.186	932.464
157.954	520.536	915.622
159.36	650.316	878.35
153.464	597.012	947.997
159.143	571.627	955.687
130.929	439.73	935.828
140.799	476.63	1039.68
122.76	552.606	962.192
187.51	566.408	1048.89
185.892	576.891	1008.03
187.257	582.065	990.715
177.528	605.768	922.164
184.547	639.823	1000.04
185.491	618.046	983.241
181.91	592.163	1103.39
182.798	444.8	1169.23
193.18	453	1181.73
198.748	433.1	1159.91
246.3	713.8	920.013
230.6	599.1	1117.89
225.7	495.2	1131.52
171.8	474.7	1140.49
188.6	481.4	1158.7
186.3	471.2	1101.83
222.7	481.7	1066.64
234.9	508.7	1106.85
238.2	458.3	1135.45
213.9	427.8	750.521
	390.1	1183.39
	418.1	1178.59
	430.7	1181.67
	434.3	1185.74
	421.6	1180.7
	369.2	1173.9
	419.2	1217.37
	395.6	1060.55
		1067.79
		1149.27
		1211.42
		911.261
		973.255
		1171.27
		1130.84
		1167.15
		1114.96
		1171.75
		1191.72
		1123.53
		1084.04
		1158.71
		1137.59

## Sheet: binding FBAR
1	2	5
21.5803	36.3072	59.7698
18.0807	34.0724	62.4899
17.4457	39.5515	59.9309
28.0044	40.2747	64.9741
27.4399	38.3944	68.0757
26.4976	37.3015	66.298
29.8681	38.8152	69.7036
25.0685	43.3193	70.63
30.1873	33.9307	67.8404
28.6748	32.8582	68.599
32.9602	33.4394	55.7373
28.8407	37.4446	58.2117
30.8125	31.0003	58.0794
29.9208	35.0994	64.3469
30.165	33.6069	62.8165
23.2048	31.7609	62.6333
23.2501	31.8144	55.3781
20.2426	30.9971	55.4637
36.91	37.1503	57.3398
36.7321	29.5004	53.7499
41.9839	28.9415
40.1165	27.4964
38.3879	43.0582
38.8416	28.6231
37.9791	29.1557
56.233	32.9248
35.8126	36.7832
	37.7242
	33.5323

## Sheet: Intensity FCHo2
< 1000	< 1500	< 2000	> 2000
1350.78	1180.6	1361.4	3045.49
1350.78	1180.6	1361.4	3045.49
1350.78	1180.6	1361.4	3045.49
1448.3	1359.57	1627.81	928.46
1448.3	1359.57	1627.81	928.46
1448.3	1359.57	1627.81	928.46
1422.38	1395.76	894.243	1325.89
1422.38	1395.76	894.243	1325.89
1422.38	1395.76	894.243	1325.89
1559.08	573.757	1926.19	1574.35
1559.08	573.757	1926.19	1574.35
1559.08	573.757	1926.19	1574.35
1418.97	1083.3	1231.24	1052.49
1418.97	1083.3	1231.24	1052.49
1418.97	1083.3	1231.24	1052.49
1731.76	1112.19	1580.4	1619.54
1731.76	1112.19	1580.4	1619.54
1731.76	1112.19	1580.4	1619.54
1435.68	1411.73	627.27	1264.24
1435.68	1411.73	627.27	1264.24
1435.68	1411.73	627.27	1264.24
772.027	1407.7	1241.73	1301.05
772.027	1407.7	1241.73	1301.05
772.027	1407.7	1241.73	1301.05
1248.27	1293.95	1365.87	1384.35
1248.27	1293.95	1365.87	1384.35
1248.27	1293.95	1365.87	1384.35
1196.08	1576.23	1632.24	1314.49
1196.08	1576.23	1632.24	1314.49
1196.08	1576.23	1632.24	1314.49
1287.73	1422.51	1263.95	1300.22
1287.73	1422.51	1263.95	1300.22
1287.73	1422.51	1263.95	1300.22
1316.76	1292	1416.6	1562.49
1316.76	1292	1416.6	1562.49
1316.76	1292	1416.6	1562.49
1487.19	1400.27	1934.54	1536.19
1487.19	1400.27	1934.54	1536.19
1487.19	1400.27	1934.54	1536.19
723	1347.92	2112.59	1408.3
723	1347.92	2112.59	1408.3
723	1347.92	2112.59	1408.3
1271.92	1847.62	1405	1503.19
1271.92	1847.62	1405	1503.19
1271.92	1847.62	1405	1503.19
828	1227.76	1597.92	3002.58
828	1227.76	1597.92	3002.58
828	1227.76	1597.92	3002.58
837.297	1768.71	2116.43	1905.4
837.297	1768.71	2116.43	1905.4
837.297	1768.71	2116.43	1905.4
1243.3	1198.3	1555.68	1828.84
1243.3	1198.3	1555.68	1828.84
1243.3	1198.3	1555.68	1828.84
1312.95	1626.76	1344	1250.22
1312.95	1626.76	1344	1250.22
1312.95	1626.76	1344	1250.22
1420.92	1011.7	2130.54	2417.42
1420.92	1011.7	2130.54	2417.42
1420.92	1011.7	2130.54	2417.42
1450.84	1267.65	1541.68	1969.81
1450.84	1267.65	1541.68	1969.81
1450.84	1267.65	1541.68	1969.81
1465.84	1259.24	1353.81	2840.57
1465.84	1259.24	1353.81	2840.57
1465.84	1259.24	1353.81	2840.57
1237.27	1136.62	1511.51	1304.11
1237.27	1136.62	1511.51	1304.11
1237.27	1136.62	1511.51	1304.11
710.54	1349.54	1148	1255.81
710.54	1349.54	1148	1255.81
710.54	1349.54	1148	1255.81
1518.81	1659.13	1630.89	1394.46
1518.81	1659.13	1630.89	1394.46
1518.81	1659.13	1630.89	1394.46
536.919	1577.4	1485.4	4007.11
536.919	1577.4	1485.4	4007.11
536.919	1577.4	1485.4	4007.11
1029.4	1257.43	1052.84	3425.19
1029.4	1257.43	1052.84	3425.19
1029.4	1257.43	1052.84	3425.19
781.73	1513.03	1994.65	1208.22
781.73	1513.03	1994.65	1208.22
781.73	1513.03	1994.65	1208.22
1318	976.135	805.243	3006.11
1318	976.135	805.243	3006.11
1318	976.135	805.243	3006.11
1135.4	1225.27	1674.62	1338.7
1135.4	1225.27	1674.62	1338.7
1135.4	1225.27	1674.62	1338.7
1644.31	1031	1299.87	1247.51
1644.31	1031	1299.87	1247.51
1644.31	1031	1299.87	1247.51
875.649	1277.97	1997.89	1505.16
875.649	1277.97	1997.89	1505.16
875.649	1277.97	1997.89	1505.16
1270.73	1543.46	1341.31	7929.69
1270.73	1543.46	1341.31	7929.69
1270.73	1543.46	1341.31	7929.69
1167	1949.87	816.649	1393.08
1167	1949.87	816.649	1393.08
1167	1949.87	816.649	1393.08
1107.57	1493.05	1203.13	4490.56
1107.57	1493.05	1203.13	4490.56
1107.57	1493.05	1203.13	1294.32
1707.89	1721.97	1228.19	1294.32
1707.89	1721.97	1228.19	1294.32
1707.89	1721.97	1228.19	2019.46
1430.05	1567.05	1307.81	2019.46
1430.05	1567.05	1307.81	2019.46
1430.05	1567.05	1307.81	1979.97
1197.7	1218.11	1331.19	1979.97
1197.7	1218.11	1331.19	1979.97
1197.7	1218.11	1331.19	1695.11
1756.73	1350.22	2122.24	1695.11
1756.73	1350.22	2122.24	1695.11
1756.73	1350.22	2122.24	1039.24
1543.54	1107.85	1964.49	1039.24
1543.54	1107.85	1964.49	1039.24
1543.54	1107.85	1964.49	3768.37
1726.62	1347.54	1282.16	3768.37
1726.62	1347.54	1282.16	3768.37
1726.62	1347.54	1282.16	1419.57
828.243	1019.46	1829.76	1419.57
828.243	1019.46	1829.76	1419.57
828.243	1019.46	1829.76	1285.51
1336.57	1577.87	1809.46	1285.51
1336.57	1577.87	1809.46	1285.51
1336.57	1577.87	1809.46	1672.05
1257.11	1358.54	1798.46	1672.05
1257.11	1358.54	1798.46	1672.05
1257.11	1358.54	1798.46	1732.46
1018.03	1264.22	1672.65	1732.46
1018.03	1264.22	1672.65	1732.46
1018.03	1264.22	1672.65	1477.38
929.487	1250.54	1881.68	1477.38
929.487	1250.54	1881.68	1477.38
929.487	1250.54	1881.68	1524.89
1575.16	1465.49	1560	1524.89
1575.16	1465.49	1560	1524.89
1575.16	1465.49	1560	2438.03
952.892	1568.46	1942.62	2438.03
952.892	1568.46	1942.62	2438.03
952.892	1568.46	1942.62	1512.76
957.538	1630.26	1202.57	1512.76
957.538	1630.26	1202.57	1512.76
957.538	1630.26	1202.57	1163.84
1145.6	1414.7	1499.6	1163.84
1145.6	1414.7	1499.6	1163.84
1145.6	1414.7	1499.6	2242.16
1280.81	1322	1692.89	2242.16
1280.81	1322	1692.89	2242.16
1280.81	1322	1692.89	3185.27
1178.03	1125.35	1681.6	3185.27
1178.03	1125.35	1681.6	3185.27
1178.03	1125.35	1681.6	2350.68
1464.43	647.054	1212.89	2350.68
1464.43	647.054	1212.89	2350.68
1464.43	647.054	1212.89	1883.65
1265.24	1671.81	1256.87	1883.65
1265.24	1671.81	1256.87	1883.65
1265.24	1671.81	1256.87	925.405
2012.48	829.108	1228.22	925.405
2012.48	829.108	1228.22	925.405
2012.48	829.108	1228.22	1661.92
1213.35	1470.05	1132.6	1661.92
1213.35	1470.05	1132.6	1661.92
1213.35	1470.05	1132.6	1582.4
1369.54	1537.24	1827.7	1582.4
1369.54	1537.24	1827.7	1582.4
1369.54	1537.24	1827.7	2635.57
1334.81	1279.84	1391.32	2635.57
1334.81	1279.84	1391.32	2635.57
1334.81	1279.84	1391.32	2185.86
956.514	1372.68	1136.95	2185.86
956.514	1372.68	1136.95	2185.86
956.514	1372.68	1136.95	1376.22
1124.7	1138.11	1748.51	1376.22
1124.7	1138.11	1748.51	1376.22
1124.7	1138.11	1748.51	1291.54
1386.7	1132.57	1428.51	1291.54
1386.7	1132.57	1428.51	1291.54
1386.7	1132.57	1428.51	1242.19
1590.46	693.027	1084	1242.19
1590.46	693.027	1084	1242.19
1590.46	693.027	1084	1131.19
1029	1186.1	1531.43	1131.19
1029	1186.1	1531.43	1131.19
1029	1186.1	1531.43	2173.32
1544.27	644.027	1955.13	2173.32
1544.27	644.027	1955.13	2173.32
1544.27	644.027	1955.13	1257
1787.89	1264.49	1396.81	1257
1787.89	1264.49	1396.81	1257
1787.89	1264.49	1396.81	1471.38
1131.37	1163.35	2402.92	1471.38
1131.37	1163.35	2402.92	1471.38
1131.37	1163.35	2402.92	1941.11
1196.87	868.892	1853.84	1941.11
1196.87	868.892	1853.84	1941.11
1196.87	868.892	1853.84	2838.08
1298.97	1261.03	1813.08	2838.08
1298.97	1261.03	1813.08	2838.08
1298.97	1261.03	1813.08	1767.03
1495.87	1184.87	1560.27	1767.03
1495.87	1184.87	1560.27	1767.03
1495.87	1184.87	1560.27	1239.87
1337.84	1247.76	1365.35	1239.87
1337.84	1247.76	1365.35	1239.87
1337.84	1247.76	1365.35	2245.3
1216.78	1340.16	1700.32	2245.3
1216.78	1340.16	1700.32	2245.3
1216.78	1340.16	1700.32	2141.08
1398.76	1017.46	1625.68	2141.08
1398.76	1017.46	1625.68	2141.08
1398.76	1017.46	1625.68	1727.92
1212.95	1325.78	1748.46	1727.92
1212.95	1325.78	1748.46	1727.92
1212.95	1325.78	1748.46	2484.62
1547.92	1088.16	6693	2484.62
1547.92	1088.16	6693	2484.62
1547.92	1088.16	6693	3780.21
1561.03	1526.27	1101.92	3780.21
1561.03	1526.27	1101.92	3780.21
1561.03	1526.27	1101.92	2326.54
1343.3	1571.08	3081.16	2326.54
1343.3	1571.08	3081.16	2326.54
1343.3	1571.08	3081.16	2722.11
1511.95	1350.03	1232.46	2722.11
1511.95	1350.03	1232.46	2722.11
1511.95	1350.03	1232.46	3191
1345.76	1377.46	1552.97	3191
1345.76	1377.46	1552.97	3191
1345.76	1377.46	1552.97	1721.92
795.703	1156.65	1325	1721.92
795.703	1156.65	1325	1721.92
795.703	1156.65	1325	4115
1210.7	1273.43	660.351	4115
1210.7	1273.43	660.351	4115
1210.7	1273.43	660.351	3051.7
1074.5	1311.85	1527.35	3051.7
1074.5	1311.85	1527.35	3051.7
1074.5	1311.85	1527.35	3493.73
1373.65	1165.57	1551.43	3493.73
1373.65	1165.57	1551.43	3493.73
1373.65	1165.57	1551.43	1444.4
1246.35	1461.19	1357.3	1444.4
1246.35	1461.19	1357.3	1444.4
1246.35	1461.19	1357.3	1442.19
920.595	1592.95	1509.6	1442.19
920.595	1592.95	1509.6	1442.19
920.595	1592.95	1509.6	2836
1876.73	1445.03	1557.43	2836
1876.73	1445.03	1557.43	2836
1876.73	1445.03	1557.43	1592.62
1736.05	1962.05	1934.95	1592.62
1736.05	1962.05	1934.95	1592.62
1736.05	1962.05	1934.95	1520.51
1272.43	1520.5	1370.7	1520.51
1272.43	1520.5	1370.7	1520.51
1272.43	1520.5	1370.7	3379.86
1175.68	1559.49	968.838	3379.86
1175.68	1559.49	968.838	3379.86
1175.68	1559.49	968.838	801.703
2374.51	1660.76	1820.73	801.703
2374.51	1660.76	1820.73	801.703
2374.51	1660.76	1820.73	2235.84
1116.73	1410.51	2002.03	2235.84
1116.73	1410.51	2002.03	2235.84
1116.73	1410.51	2002.03	1504.57
1254.92	1878.05	1358.87	1504.57
1254.92	1878.05	1358.87	1504.57
1254.92	1878.05	1358.87	1243.81
1280.43	1613.16	1207.92	1243.81
1280.43	1613.16	1207.92	1243.81
1280.43	1613.16	1207.92	1355
1668.35	1226.19	1306.87	1355
1668.35	1226.19	1306.87	1355
1668.35	1226.19	1306.87	4365.08
1223.7	1366.4	1222.81	4365.08
1223.7	1366.4	1222.81	4365.08
1223.7	1366.4	1222.81	1336.57
1417.65	1650.95	1413.6	1336.57
1417.65	1650.95	1413.6	1336.57
1417.65	1650.95	1413.6	3399.22
1285.68	1013.32	1382.05	3399.22
1285.68	1013.32	1382.05	3399.22
1285.68	1013.32	1382.05	1439.3
1594.43	1161.44	1198.89	1439.3
1594.43	1161.44	1198.89	1439.3
1594.43	1161.44	1198.89	4776.05
1286.08	1611.68	1207.03	4776.05
1286.08	1611.68	1207.03	4776.05
1286.08	1611.68	1207.03	1706.97
1207.65	1337.38	7332.06	1706.97
1207.65	1337.38	7332.06	1706.97
1207.65	1337.38	7332.06	1229.69
1460.4	1768.39	1903.51	1229.69
1460.4	1768.39	1903.51	1229.69
1460.4	1768.39	1903.51	3183.89
1597.03	1491.27	1303.22	3183.89
1597.03	1491.27	1303.22	3183.89
1597.03	1491.27	1303.22	4660.24
2673.08	1578.87	1414.3	4660.24
2673.08	1578.87	1414.3	4660.24
2673.08	1578.87	1414.3	5613.97
1368.65	1154.24	1247.35	5613.97
1368.65	1154.24	1247.35	5613.97
1368.65	1154.24	1247.35
1117.71	1206.51	1461.03
1117.71	1206.51	1461.03
1117.71	1206.51	1461.03
1523.78	1113.03	1318
1523.78	1113.03	1318
1523.78	1113.03	1318
1062.92	1210.32	3872.08
1062.92	1210.32	3872.08
1062.92	1210.32	3872.08
1288.92	1519.65	823.595
1288.92	1519.65	823.595
1288.92	1519.65	823.595
1483.46	1729.78	1547.51
1483.46	1729.78	1547.51
1483.46	1729.78	1547.51
1748.62	1022.78	844.054
1748.62	1022.78	844.054
1748.62	1022.78	844.054
1126.73	1209.73	1164.49
1126.73	1209.73	1164.49
1126.73	1209.73	1164.49
1223.27	1247.19	1481.03
1223.27	1247.19	1481.03
1223.27	1247.19	1481.03
1519.57	1526.27	1328.32
1519.57	1526.27	1328.32
1519.57	1526.27	1328.32
1407.4	989.243	1252.24
1407.4	989.243	1252.24
1407.4	989.243	1252.24
2262.51	1007.37	1342
2262.51	1007.37	1342
2262.51	1007.37	1342
1298.4	1417.19	1388.73
1298.4	1417.19	1388.73
1298.4	1417.19	1388.73
1515.94	1150.84	1501.43
1515.94	1150.84	1501.43
1515.94	1150.84	1501.43
1335.32	1126.77	1256.84
1335.32	1126.77	1256.84
1335.32	1126.77	1256.84
1659.27	1165.22	1468.35
1659.27	1165.22	1468.35
1659.27	1165.22	1468.35
1327.73	1277.46	1371.22
1327.73	1277.46	1371.22
1327.73	1277.46	1371.22
1737.02	698.622	1088.57
1737.02	698.622	1088.57
1737.02	698.622	1088.57
1911.11	1413.79	1065.49
1911.11	1413.79	1065.49
1911.11	1413.79	1065.49
1244.19	1147.62	2331.97
1244.19	1147.62	2331.97
1244.19	1147.62	2331.97
1388.35	1438.54	1419.13
1388.35	1438.54	1419.13
1388.35	1438.54	1419.13
1367.27	1737.76	1374.6
1367.27	1737.76	1374.6
1367.27	1737.76	1374.6
1460.51	739.892	1456.24
1460.51	739.892	1456.24
1460.51	739.892	1456.24
1465.81	1204.89	2303.57
1465.81	1204.89	2303.57
1465.81	1204.89	2303.57
1655.65	953.486	1315.08
1655.65	953.486	1315.08
1655.65	953.486	1315.08
1323.7	1369.13	2292.62
1323.7	1369.13	2292.62
1323.7	1369.13	2292.62
1383.27	1349.89	6812.66
1383.27	1349.89	6812.66
1383.27	1349.89	6812.66
1375.16	1327.46	1456.08
1375.16	1327.46	1456.08
1375.16	1327.46	1456.08
1029.84	1208.03	1160.49
1029.84	1208.03	1160.49
1029.84	1208.03	1160.49
1602.81	1579.08	2280.91
1602.81	1579.08	2280.91
1602.81	1579.08	2280.91
1328.89	1300.24	2463.03
1328.89	1300.24	2463.03
1328.89	1300.24	2463.03
916.811	1140.03	1054.97
916.811	1140.03	1054.97
916.811	1140.03	1054.97
1246.62	1077.95	2236.89
1246.62	1077.95	2236.89
1246.62	1077.95	2236.89
1404.57	1489.97	1712.27
1404.57	1489.97	1712.27
1404.57	1489.97	1712.27
1352.38	1412.46	2110.08
1352.38	1412.46	2110.08
1352.38	1412.46	2110.08
1497.24	1386.16	1249.78
1497.24	1386.16	1249.78
1497.24	1386.16	1249.78
1376.3	1518.76	890.162
1376.3	1518.76	890.162
1376.3	1518.76	890.162
1225.32	1296.97	1346.65
1225.32	1296.97	1346.65
1225.32	1296.97	1346.65
1311.16	1397.78	1394.3
1311.16	1397.78	1394.3
1311.16	1397.78	1394.3
1860.24	1638.11	1315.13
1860.24	1638.11	1315.13
1860.24	1638.11	1315.13
1244.7	1281.24	1753.13
1244.7	1281.24	1753.13
1244.7	1281.24	1753.13
877.135	1170.43	1362.3
877.135	1170.43	1362.3
877.135	1170.43	1362.3
1321.24	1884.46	938.595
1321.24	1884.46	938.595
1321.24	1884.46	938.595
1574.89	1280.7	1475.49
1574.89	1280.7	1475.49
1574.89	1280.7	1475.49
1703.38	1159.08	1111.32
1703.38	1159.08	1111.32
1703.38	1159.08	1111.32
1588.57	1474.42	1606.84
1588.57	1474.42	1606.84
1588.57	1474.42	1606.84
1183.54	1066.51	1302.35
1183.54	1066.51	1302.35
1183.54	1066.51	1302.35
1972	1652.16	1564.35
1972	1652.16	1564.35
1972	1652.16	1564.35
1442.13	1578.16	1863.76
1442.13	1578.16	1863.76
1442.13	1578.16	1863.76
1586.35	1375.43	1361.44
1586.35	1375.43	1361.44
1586.35	1375.43	1361.44
1398.73	1136.98	1501.95
1398.73	1136.98	1501.95
1398.73	1136.98	1501.95
1242.3	1175.08	1122.57
1242.3	1175.08	1122.57
1242.3	1175.08	1122.57
1374.19	1248.4	1152.13
1374.19	1248.4	1152.13
1374.19	1248.4	1152.13
1292.38	1011.49	2968.03
1292.38	1011.49	2968.03
1292.38	1011.49	2968.03
969.027	1101.22	1264.11
969.027	1101.22	1264.11
969.027	1101.22	1264.11
1693.27	1328.54	1667.73
1693.27	1328.54	1667.73
1693.27	1328.54	1667.73
1165.92	1406.22	1155.97
1165.92	1406.22	1155.97
1165.92	1406.22	1155.97
1267.49	1395.16	1336.11
1267.49	1395.16	1336.11
1267.49	1395.16	1336.11
1245.38	1152.95	1287.78
1245.38	1152.95	1287.78
1245.38	1152.95	1287.78
1024.16	1581.46	1273.87
1024.16	1581.46	1273.87
1024.16	1581.46	1273.87
1389.87	1470.51	1082.92
1389.87	1470.51	1082.92
1389.87	1470.51	1082.92
1751.38	1106.97	1166.32
1751.38	1106.97	1166.32
1751.38	1106.97	1166.32
1196.27	1689.81	1846.27
1196.27	1689.81	1846.27
1196.27	1689.81	1846.27
1538.92	1349.06	1769.13
1538.92	1349.06	1769.13
1538.92	1349.06	1769.13
1478.95	1182.51	1291.35
1478.95	1182.51	1291.35
1478.95	1182.51	1291.35
2168.11	1087.78	1872.08
2168.11	1087.78	1872.08
2168.11	1087.78	1872.08
1548.08	1203.22	1177.7
1548.08	1203.22	1177.7
1548.08	1203.22	1177.7
1216.05	1308.4	1167.62
1216.05	1308.4	1167.62
1216.05	1308.4	1167.62
1229	1756.57	1299.73
1229	1756.57	1299.73
1229	1756.57	1299.73
968.108	777.027	1133.84
968.108	777.027	1133.84
968.108	777.027	1133.84
1061.76	1194.32	1767.57
1061.76	1194.32	1767.57
1061.76	1194.32	1767.57
1248.62	1613.4	1116.38
1248.62	1613.4	1116.38
1248.62	1613.4	1116.38
1173	1510.13	1125.51
1173	1510.13	1125.51
1173	1510.13	1125.51
1128.65	1288.05	1195.11
1128.65	1288.05	1195.11
1128.65	1288.05	1195.11
1305.68	1016.7	1936.87
1305.68	1016.7	1936.87
1305.68	1016.7	1936.87
1274.62	1489.51	1637.65
1274.62	1489.51	1637.65
1274.62	1489.51	1637.65
1543.73	1332	1863.68
1543.73	1332	1863.68
1543.73	1332	1863.68
1325.08	1516.89	1387.3
1325.08	1516.89	1387.3
1325.08	1516.89	1387.3
1187.11	1576	1265.84
1187.11	1576	1265.84
1187.11	1576	1265.84
1547.95	1566.27	1753.24
1547.95	1566.27	1753.24
1547.95	1566.27	1753.24
1743.4	1156.49	1279.22
1743.4	1156.49	1279.22
1743.4	1156.49	1279.22
1623.3	1735.6	1743.92
1623.3	1735.6	1743.92
1623.3	1735.6	1743.92
1263.32	1312.92	1642.49
1263.32	1312.92	1642.49
1263.32	1312.92	1642.49
1150.81	1387.08	1009.3
1150.81	1387.08	1009.3
1150.81	1387.08	1009.3
1095.97	1176.43	2113.08
1095.97	1176.43	2113.08
1095.97	1176.43	2113.08
1530.65	1404.03	1863.84
1530.65	1404.03	1863.84
1530.65	1404.03	1863.84
1194.94	1291.89	1615.57
1194.94	1291.89	1654.97
1194.94	1291.89	1615.57
1617.38	1753.76	1654.97
1617.38	1753.76	1615.57
1617.38	1753.76	1654.97
607.649	1174.68	1305.87
607.649	1174.68	1305.87
607.649	1174.68	1305.87
1341.51	1766.68	1304.65
1341.51	1766.68	1304.65
1341.51	1766.68	1304.65
1649.73	1344.7	1197.92
1649.73	1344.7	1197.92
1649.73	1344.7	1197.92
1075.3	1390.43	1309.84
1075.3	1390.43	1309.84
1075.3	1390.43	1309.84
1041.48	1331.19	1418.46
1041.48	1331.19	1418.46
1041.48	1331.19	1418.46
1363.22	1223.76	1225.95
1363.22	1223.76	1225.95
1363.22	1223.76	1225.95
1617.87	1173.08	1333.54
1617.87	1173.08	1333.54
1617.87	1173.08	1333.54
1226.13	1561.46	1382.76
1226.13	1561.46	1382.76
1226.13	1561.46	1382.76
1372.35	666.243	1191.46
1372.35	666.243	1191.46
1372.35	666.243	1191.46
1397.3	1262.03	1182.6
1397.3	1262.03	1182.6
1397.3	1262.03	1182.6
1354.16	1356.03	1223.38
1354.16	1356.03	1223.38
1354.16	1356.03	1223.38
1342.73	1438.3	1584.22
1342.73	1438.3	1584.22
1342.73	1438.3	1584.22
1242.78	1325.13	1306.78
1242.78	1325.13	1306.78
1242.78	1325.13	1306.78
1227.08	1597.38	1208.19
1227.08	1597.38	1208.19
1227.08	1597.38	1208.19
970.269	1121.84	1400.68
970.269	1121.84	1400.68
970.269	1121.84	1400.68
1491.76	1249.49	1235.35
1491.76	1249.49	1235.35
1491.76	1249.49	1235.35
1564.03	1145.78	1779.08
1564.03	1145.78	1779.08
1564.03	1145.78	1779.08
2299.43	1033.05	1714.76
2299.43	1033.05	1714.76
2299.43	1033.05	1714.76
1649.95	1097.51	1597.89
1649.95	1097.51	1597.89
1649.95	1097.51	1597.89
1525.22	2019.43	1308.73
1525.22	2019.43	1308.73
1525.22	2019.43	1308.73
1563.88	1974.95	1844.43
1563.88	1974.95	1844.43
1563.88	1974.95	1844.43
1689.73	1206.92	857.108
1689.73	1206.92	857.108
1689.73	1206.92	857.108
1736.08	1355.05	1292.11
1736.08	1355.05	1292.11
1736.08	1355.05	1292.11
1480.11	1425.95	1257.95
1480.11	1425.95	1257.95
1480.11	1425.95	1257.95
1446	1392.57	1075.49
1446	1392.57	1075.49
1446	1392.57	1075.49
1366.3	1903.84	2467.03
1366.3	1903.84	2467.03
1366.3	1903.84	2467.03
1620.51	1626.08	1355.65
1620.51	1626.08	1355.65
1620.51	1626.08	1355.65
1316.73	1435.84	1259.51
1316.73	1435.84	1259.51
1316.73	1435.84	1259.51
1650.6	1408.87	1155.08
1650.6	1408.87	1155.08
1650.6	1408.87	1155.08
1402.4	1595.27	1177.73
1402.4	1595.27	1177.73
1402.4	1595.27	1177.73
1285.76	1525.65	1250.81
1285.76	1525.65	1250.81
1285.76	1525.65	1250.81
1148.65	1323.13	1989.21
1148.65	1323.13	1989.21
1148.65	1323.13	1989.21
1683.75	1365.87	1623.62
1683.75	1365.87	1623.62
1683.75	1365.87	1623.62
1826.76	1172.76	1530.3
1826.76	1172.76	1530.3
1826.76	1172.76	1530.3
1501.87	1011.38	1331.05
1501.87	1011.38	1331.05
1501.87	1011.38	1331.05
1359.13	3074.89	1150.81
1359.13	3074.89	1150.81
1359.13	3074.89	1150.81
1256.24	1160.08	1006.57
1919.54	1160.08	1006.57
1256.24	1160.08	1006.57
1919.54	1177.54	1471.49
1256.24	1177.54	1471.49
1919.54	1177.54	1471.49
1110.05	1820.38	1823.22
1110.05	1820.38	1823.22
1110.05	1820.38	1823.22
1371.35	1325.3	1586
1371.35	1325.3	1586
1371.35	1325.3	1586
1317.38	1164.97	1474.78
1317.38	1164.97	1474.78
1317.38	1164.97	1474.78
1221.62	1249.16	1227.92
1221.62	1249.16	1227.92
1221.62	1249.16	1227.92
1279.15	1317.38	1474.68
1279.15	1317.38	1474.68
1279.15	1317.38	1474.68
1178.84	1745.76	2356.59
1178.84	1745.76	2356.59
1178.84	1745.76	2356.59
1253.05	1525.05	958.162
1253.05	1525.05	958.162
1253.05	1525.05	958.162
1584.57	1330.87	2971.35
1584.57	1330.87	2971.35
1584.57	1330.87	2971.35
1498.84	1674	1795.54
1498.84	1674	1795.54
1498.84	1674	1795.54
1355.68	1125.95	2016.22
1355.68	1125.95	2016.22
1355.68	1125.95	2016.22
1201.3	2020.05	1906.38
1201.3	2020.05	1906.38
1201.3	2020.05	1906.38
1628.68	1321.16	1607.11
1628.68	1321.16	1607.11
1628.68	1321.16	1607.11
1312.24	1206.92	1018.62
1312.24	1206.92	1018.62
1312.24	1206.92	1018.62
1102.92	1166.03	1381
1102.92	1166.03	1381
1102.92	1166.03	1381
1483.68	1784.11	1938
1483.68	1784.11	1938
1483.68	1784.11	1938
1087.32	1323.87	1097.05
1087.32	1323.87	1097.05
1087.32	1323.87	1097.05
1701	1453.35	758.486
1701	1453.35	758.486
1701	1453.35	758.486
1884.54	1329	1563.73
1884.54	1329	1563.73
1884.54	1329	1563.73
1354.7	1540.38	1216.13
1354.7	1540.38	1216.13
1354.7	1540.38	1216.13
948.73	1180.49	1601.11
948.73	1180.49	1601.11
948.73	1180.49	1601.11
1492.97	1463.19	1217.05
1492.97	1463.19	1217.05
1492.97	1463.19	1217.05
1723.95	1265.84	1729.78
1723.95	1265.84	1729.78
1723.95	1265.84	1729.78
1524.62	1962.3	1909.16
1524.62	1962.3	1909.16
1524.62	1962.3	1909.16
846.324	1330	1193
846.324	1330	1193
846.324	1330	1193
1538.49	2284.05	2172.62
1538.49	2284.05	2172.62
1538.49	2284.05	2172.62
1623.11	1290.32	1239.57
1623.11	1290.32	1239.57
1623.11	1290.32	1239.57
1628.11	1044.92	1172.54
1628.11	1044.92	1172.54
1628.11	1044.92	1172.54
1482.03	1237.51	1282.92
1482.03	1237.51	1282.92
1482.03	1237.51	1282.92
1312.24	1543.13	5046.36
1312.24	1543.13	5046.36
1312.24	1543.13	5046.36
1342.54	1590.68	984.243
1342.54	1590.68	984.243
1342.54	1590.68	984.243
860.54	1483.76	1298.97
860.54	1483.76	1298.97
860.54	1483.76	1298.97
1205.08	1063.95	2343.32
1205.08	1063.95	2343.32
1205.08	1063.95	2343.32
1329.51	1841.03	2329.62
1329.51	1841.03	2329.62
1329.51	1841.03	2329.62
1463.49	1350.65	2559.67
1463.49	1350.65	2559.67
1463.49	1350.65	2559.67
1530.6	1273.54	1480.32
1530.6	1273.54	1480.32
1530.6	1273.54	1480.32
1192.92	4350.72	1163.51
1192.92	4350.72	1163.51
1192.92	4350.72	1163.51
1419	1350.97	1206.49
1419	1350.97	1206.49
1419	1350.97	1206.49
994.514	793.676	1195.73
994.514	793.676	1195.73
994.514	793.676	1195.73
1149.16	1752.87	1136.92
1149.16	1752.87	1136.92
1149.16	1752.87	1136.92
1509.92	1539.4	1512.84
1509.92	1539.4	1512.84
1509.92	1539.4	1512.84
1160.08	1192.73	4132.52
1160.08	1192.73	4132.52
1160.08	1192.73	4132.52
1442.65	1131.62	1408.38
1442.65	1131.62	1408.38
1442.65	1131.62	1408.38
1302.92	1219.57	1362.89
1302.92	1219.57	1362.89
1302.92	1219.57	1362.89
1296.38	1081.05	1286.24
1296.38	1081.05	1286.24
1296.38	1081.05	1286.24
	1625.67	1549.35
	1625.67	1549.35
	1625.67	1549.35
	1193.4	1129.97
	1193.4	1129.97
	1193.4	1129.97
	1333.4	1163.81
	1333.4	1163.81
	1333.4	1163.81
	1272.16	1741.49
	1272.16	1741.49
	1272.16	1741.49
	1707.42	3337.22
	1707.42	3337.22
	1707.42	3337.22
	1776.21	1218.05
	1776.21	1218.05
	1776.21	1218.05
	1605	1531.3
	1605	1531.3
	1605	1531.3
	1359.7	1227.95
	1359.7	1227.95
	1359.7	1227.95
	1500.43	1786.73
	1500.43	1786.73
	1500.43	1786.73
	1313.32	1242.63
	1313.32	1242.63
	1313.32	1242.63
	1174.68	1334.19
	1174.68	1334.19
	1174.68	1334.19
	1476.11	1287.16
	1476.11	1287.16
	1476.11	1287.16
	1538	901.54
	1538	901.54
	1538	901.54
	1739.4	1457.57
	1739.4	1457.57
	1739.4	1457.57
	838.892	1221.38
	838.892	1221.38
	838.892	1221.38
	1164.95	3089.19
	1164.95	3089.19
	1164.95	3089.19
	1432.22	1363.6
	1432.22	1363.6
	1432.22	1363.6
	1331.54	1524.19
	1331.54	1524.19
	1331.54	1524.19
	1502.54	2333.68
	1502.54	2333.68
	1502.54	2333.68
	1560.97	1672.78
	1560.97	1672.78
	1560.97	1672.78
	1407.3	1719.19
	1407.3	1719.19
	1407.3	1719.19
	1696.3	1493.95
	1696.3	1493.95
	1696.3	1493.95
	1679.11	938.784
	1679.11	938.784
	1679.11	938.784
	1009.08	1986.68
	1009.08	1986.68
	1009.08	1986.68
	1260.05	963.865
	1260.05	963.865
	1260.05	963.865
	1462.76	1562.6
	1462.76	1562.6
	1462.76	1562.6
	1619.16	2318.68
	1619.16	2318.68
	1619.16	2318.68
	1389.03	1404.54
	1389.03	1404.54
	1389.03	1404.54
	1426.43	1738.7
	1426.43	1738.7
	1426.43	1738.7
	1466.84	1142
	1466.84	1142
	1466.84	1142
	1238.7	1097.19
	1238.7	1097.19
	1238.7	1097.19
	1414.58	1827.76
	1414.58	1827.76
	1414.58	1827.76
	1194.35	3077.11
	1194.35	3077.11
	1194.35	3077.11
	1586.51	1202.3
	1586.51	1202.3
	1586.51	1202.3
	1283.78	1470.84
	1283.78	1470.84
	1283.78	1470.84
	1126.95	1278.87
	1126.95	1278.87
	1126.95	1278.87
	1619.38	1379.35
	1619.38	1379.35
	1619.38	1379.35
	1545.62	1477.13
	1545.62	1477.13
	1545.62	1477.13
	1843.95	1930.35
	1843.95	1930.35
	1843.95	1930.35
	1311.3	1474.11
	1311.3	1474.11
	1311.3	1474.11
	1467.35	1136.95
	1467.35	1136.95
	1467.35	1136.95
	1072.4	901.081
	1072.4	901.081
	1072.4	901.081
	2219.59	1812.78
	2219.59	1812.78
	2219.59	1812.78
	1238.38	1341.35
	1238.38	1341.35
	1238.38	1341.35
	889.46	5516.08
	889.46	5516.08
	889.46	5516.08
	1641.76	1709.54
	1641.76	1709.54
	1641.76	1709.54
	1363.13	1211.62
	1363.13	1211.62
	1363.13	1211.62
	1410.46	1403.87
	1410.46	1403.87
	1410.46	1403.87
	1371.08	1677.46
	1371.08	1677.46
	1371.08	1677.46
	1443.62	1174.73
	1443.62	1174.73
	1443.62	1174.73
	2233.27	1218.35
	2233.27	1218.35
	2233.27	1218.35
	1513.16	1474.27
	1513.16	1474.27
	1513.16	1474.27
	996.054	1241.95
	996.054	1241.95
	996.054	1241.95
	1422.62	2228
	1422.62	2228
	1422.62	2228
	1305.27	1124.08
	1305.27	1124.08
	1305.27	1124.08
	1987.03	1581.51
	1987.03	1581.51
	1987.03	1581.51
	1350.54	1692
	1350.54	1692
	1350.54	1692
	1232.46	1854.62
	1232.46	1854.62
	1232.46	1854.62
	1196.19	1224.87
	1196.19	1224.87
	1196.19	1224.87
	1508.08	1213.46
	1508.08	1213.46
	1508.08	1213.46
	1575.68	1957.68
	1575.68	1957.68
	1575.68	1957.68
	1272.11	1909.46
	1272.11	1909.46
	1272.11	1909.46
	1399.54	1230.13
	1399.54	1230.13
	1399.54	1230.13
	1479.54	2312.14
	1479.54	2312.14
	1479.54	2312.14
	1557.08	1858.92
	1557.08	1858.92
	1557.08	1858.92
	1129.65	2161.03
	1129.65	2161.03
	1129.65	2161.03
	1090.08	1266.32
	1090.08	1266.32
	1090.08	1266.32
	1433.62	1691.38
	1433.62	1691.38
	1433.62	1691.38
	1460.98	1253.95
	1460.98	1253.95
	1460.98	1253.95
	1503.95	1078.32
	1503.95	1078.32
	1503.95	1078.32
	1083.54	1701.54
	1083.54	1701.54
	1083.54	1701.54
	1174.46	1143.84
	1174.46	1143.84
	1174.46	1143.84
	1200.08	1253.32
	1200.08	1253.32
	1200.08	1253.32
	1294.65	1493.87
	1294.65	1493.87
	1294.65	1493.87
	1830.54	1267.81
	1830.54	1267.81
	1830.54	1267.81
	1416.78	2376.52
	1416.78	2376.52
	1416.78	2376.52
	1159.24	1688.89
	1159.24	1688.89
	1159.24	1688.89
	1118.92	1296.81
	1118.92	1296.81
	1118.92	1296.81
	1443.38	1450.27
	1443.38	1450.27
	1443.38	1450.27
	1483.81	1168.05
	1483.81	1168.05
	1483.81	1168.05
	1260.95	806.054
	1260.95	806.054
	1260.95	806.054
	1111	1390.6
	1111	1390.6
	1111	1390.6
	1605.35	1149.76
	1605.35	1149.76
	1605.35	1149.76
	1267.51	1305.76
	1267.51	1305.76
	1267.51	1305.76
	1628.3	2238.3
	1628.3	2238.3
	1628.3	2238.3
	1316.46	1471.11
	1316.46	1471.11
	1316.46	1471.11
	1095	1144.05
	1095	1144.05
	1095	1144.05
	1338.05	855.703
	1338.05	855.703
	1338.05	855.703
	2228.27	1705.19
	2228.27	1705.19
	2228.27	1705.19
	1225.08	2015.43
	1225.08	2015.43
	1225.08	2015.43
	1275.49	1408.97
	1275.49	1408.97
	1275.49	1408.97
	1182.19	1042.27
	1182.19	1042.27
	1182.19	1042.27
	1300.03	1366.32
	1300.03	1366.32
	1300.03	1366.32
	1297.43	1919.11
	1297.43	1919.11
	1297.43	1919.11
	1334.19	1092.6
	1334.19	1092.6
	1334.19	1092.6
	1507.05	1642.54
	1507.05	1642.54
	1507.05	1642.54
	1668.72	1331.38
	1668.72	1331.38
	1668.72	1331.38
	1270.78	4905.39
	1270.78	4905.39
	1270.78	4905.39
	1350	1900.73
	1350	1900.73
	1350	1900.73
	675.973	1183.78
	675.973	1183.78
	675.973	1183.78
	1244.65	1221.35
	1244.65	1221.35
	1244.65	1221.35
	1228.51	1223.57
	1228.51	1223.57
	1228.51	1223.57
	1165.43	1281.08
	1165.43	1281.08
	1165.43	1281.08
	1462.32	1345.13
	1462.32	1345.13
	1462.32	1345.13
	1692.95	805.027
	1692.95	805.027
	1692.95	805.027
	1494.46	1212.27
	1494.46	1212.27
	1494.46	1212.27
	1423.62	2193.62
	1423.62	2193.62
	1423.62	2193.62
	1649.73	1211.38
	1649.73	1211.38
	1649.73	1211.38
	1176.89	1057.68
	1176.89	1057.68
	1176.89	1057.68
	1548.22	906.892
	1548.22	906.892
	1548.22	906.892
	1476.38	1172.13
	1476.38	1172.13
	1476.38	1172.13
	1124.81	1674.32
	1124.81	1674.32
	1124.81	1674.32
	1438.03	1127
	1438.03	1127
	1438.03	1127
	1370.73	1439.97
	1370.73	1439.97
	1370.73	1439.97
	1697.08	738
	1697.08	738
	1697.08	738
	1487.84	1500.08
	1487.84	1500.08
	1487.84	1500.08
	1098.95	3183.78
	1098.95	3183.78
	1098.95	3183.78
	1260.84	1613.24
	1260.84	1613.24
	1260.84	1613.24
	2024.4	1386.32
	2024.4	1386.32
	2024.4	1386.32
	1607.85	917.622
	1607.85	917.622
	1607.85	917.622
	1279.4	2140.54
	1279.4	2140.54
	1279.4	2140.54
	1146.49	2845.22
	1146.49	2845.22
	1146.49	2845.22
	1484.62	1635.57
	1484.62	1635.57
	1484.62	1635.57
	1731.73	1051.7
	1731.73	1051.7
	1731.73	1051.7
	1975.54	882.297
	1975.54	882.297
	1975.54	882.297
	1403.89	1441.89
	1403.89	1441.89
	1403.89	1441.89
	1534.68	1377.4
	1534.68	1377.4
	1534.68	1377.4
	1432.24	2320.73
	1432.24	2320.73
	1432.24	2320.73
	1583.89	1668.43
	1583.89	1668.43
	1583.89	1668.43
	1234.89	1199.87
	1234.89	1199.87
	1234.89	1199.87
	1096.62	1120.19
	1096.62	1120.19
	1096.62	1120.19
	1375.73	1232.68
	1375.73	1232.68
	1375.73	1232.68
	1561.03	1382.76
	1561.03	1382.76
	1561.03	1382.76
	1273.6	1360.87
	1273.6	1360.87
	1273.6	1360.87
	1441.87	1106.13
	1441.87	1106.13
	1441.87	1106.13
	1347.68	1505.3
	1347.68	1505.3
	1347.68	1505.3
	1406.3	1444.84
	1406.3	1444.84
	1406.3	1444.84
	1236.95	1864.73
	1236.95	1864.73
	1236.95	1864.73
	785.703	1373.05
	785.703	1373.05
	785.703	1373.05
	1722.7	1244.57
	1722.7	1244.57
	1722.7	1244.57
	1299.32	1880.57
	1299.32	1880.57
	1299.32	1880.57
	1188.57	2592
	1188.57	2592
	1188.57	2592
	1155.68	1534.35
	1155.68	1534.35
	1155.68	1534.35
	1072.6	1347.97
	1072.6	1347.97
	1072.6	1347.97
	1554.49	1261.27
	1554.49	1261.27
	1554.49	1261.27
	1451.22	971.243
	1451.22	971.243
	1451.22	971.243
	1237.84	1366.3
	1237.84	1366.3
	1237.84	1366.3
	1110.73	1343.92
	1110.73	1343.92
	1110.73	1343.92
	1448.97	1745.57
	1448.97	1745.57
	1448.97	1745.57
	1430.05	1364.11
	1430.05	1364.11
	1430.05	1364.11
	946.649	1459.84
	946.649	1459.84
	946.649	1459.84
	1661.16	2212.05
	1661.16	2212.05
	1661.16	2212.05
	1402.54	2794.65
	1402.54	2794.65
	1402.54	2794.65
	900.757	1137.87
	900.757	1137.87
	900.757	1137.87
	937.514	1443.57
	937.514	1443.57
	937.514	1443.57
	1566.35	1411.16
	1566.35	1411.16
	1566.35	1411.16
	1257.19	1192.95
	1257.19	1192.95
	1257.19	1192.95
	1134.84	1532.95
	1134.84	1532.95
	1134.84	1532.95
	1368.65	1322.4
	1368.65	1322.4
	1368.65	1322.4
	1408.46	1758.7
	1408.46	1758.7
	1408.46	1758.7
	1728.87	1821.24
	1728.87	1821.24
	1728.87	1821.24
	1970.51	1536.08
	1970.51	1536.08
	1970.51	1536.08
	1362.22	1049.3
	1362.22	1049.3
	1362.22	1049.3
	1357.46	2244.49
	1357.46	2244.49
	1357.46	2244.49
	1489.7	1144.27
	1489.7	1144.27
	1489.7	1144.27
	1223.97	1341.87
	1223.97	1341.87
	1223.97	1341.87
	1369.11	1820.92
	1369.11	1820.92
	1369.11	1820.92
	1463.22	1591.38
	1463.22	1591.38
	1463.22	1591.38
	1478.57	1936.94
	1478.57	1936.94
	1478.57	1936.94
	1152.62	1206.54
	1152.62	1206.54
	1152.62	1206.54
	1266.38	1365.08
	1266.38	1365.08
	1266.38	1365.08
	1874.89	1307.84
	1874.89	1307.84
	1874.89	1307.84
	1901.05	1064.62
	1901.05	1064.62
	1901.05	1064.62
	1853.94	976.216
	1853.94	976.216
	1853.94	976.216
	1248.46	1648.6
	1248.46	1648.6
	1248.46	1648.6
	1143.78	1198.97
	1143.78	1198.97
	1143.78	1198.97
	1523.46	1812.7
	1523.46	1812.7
	1523.46	1812.7
	792.919	1501.11
	792.919	1501.11
	792.919	1501.11
	1237.73	1174.46
	1237.73	1174.46
	1237.73	1174.46
	1317.03	1422.38
	1317.03	1422.38
	1317.03	1422.38
	1261.24	2281.78
	1261.24	2281.78
	1261.24	2281.78
	3121.3	1062.65
	3121.3	1062.65
	3121.3	1062.65
	1233.46	1493.95
	1233.46	1493.95
	1233.46	1493.95
	1248.81	1981.24
	1248.81	1981.24
	1248.81	1981.24
	1572.16	1740.35
	1572.16	1740.35
	1572.16	1740.35
	1168.62	1264.81
	1168.62	1264.81
	1168.62	1264.81
	1056.49	1236.68
	1056.49	1236.68
	1056.49	1236.68
	1208.35	3762.24
	1208.35	3762.24
	1208.35	3762.24
	1677.16	2185.51
	1677.16	2185.51
	1677.16	2185.51
	1513.03	908.784
	1513.03	908.784
	1513.03	908.784
	1288.81	1450.4
	1288.81	1450.4
	1288.81	1450.4
	1147.49	1310.84
	1147.49	1310.84
	1147.49	1310.84
	844.432	1836.73
	844.432	1836.73
	844.432	1836.73
	1036.05	1062.32
	1036.05	1062.32
	1036.05	1062.32
	1316.84	1455.6
	1316.84	1455.6
	1316.84	1455.6
	1490.03	1142.35
	1490.03	1142.35
	1490.03	1142.35
	1347.27	1724.89
	1347.27	1724.89
	1347.27	1724.89
	1450.78	2676.43
	1450.78	2676.43
	1450.78	2676.43
	2346.89	1527.62
	2346.89	1527.62
	2346.89	1527.62
	1428.68	1309.87
	1428.68	1309.87
	1428.68	1309.87
	1327.4	1507.22
	1327.4	1507.22
	1327.4	1507.22
	1675.54	1326.49
	1675.54	1326.49
	1675.54	1326.49
	1985.76	1092.78
	1985.76	1092.78
	1985.76	1092.78
	1372.3	1229
	1372.3	1229
	1372.3	1229
	1166.7	1701.62
	1166.7	1701.62
	1166.7	1701.62
	1596.54	1893.65
	1596.54	1893.65
	1596.54	1893.65
	1376.95	1644.49
	1376.95	1644.49
	1376.95	1644.49
	1210.62	1398.3
	1210.62	1398.3
	1210.62	1398.3
	1474.4	770.324
	1474.4	770.324
	1474.4	770.324
	1231.08	4403.56
	1231.08	4403.56
	1231.08	4403.56
	1074.4	1924.3
	1074.4	1924.3
	1074.4	1924.3
	1669.95	1229.08
	1669.95	1229.08
	1669.95	1229.08
	1147.78	1878.08
	1147.78	1878.08
	1147.78	1878.08
	1232.73	2939.95
	1232.73	2939.95
	1232.73	2939.95
	1271.7	1522.65
	1271.7	1522.65
	1271.7	1522.65
	1575.4	1003.92
	1575.4	1003.92
	1575.4	1003.92
	1475.76	1259.43
	1475.76	1259.43
	1475.76	1259.43
	1433.89	1718.38
	1433.89	1718.38
	1433.89	1718.38
	1586.54	2081.41
	1586.54	2081.41
	1586.54	2081.41
	1500.57	1751.46
	1500.57	1751.46
	1500.57	1751.46
	1140.68	2416.27
	1140.68	2416.27
	1140.68	2416.27
	2024.4	1885.46
	2024.4	1885.46
	2024.4	1885.46
	1102.6	1790.84
	1102.6	1790.84
	1102.6	1790.84
	1131.08	2892.76
	1131.08	2892.76
	1131.08	2892.76
	1197.54	1933.49
	1197.54	1933.49
	1197.54	1933.49
	1581.51	1277.05
	1581.51	1277.05
	1581.51	1277.05
	1908.11	1441
	1908.11	1441
	1908.11	1441
	1075.49	1917.13
	1075.49	1917.13
	1075.49	1917.13
	889.46	1109.68
	889.46	1109.68
	889.46	1109.68
	1170.95	1203.3
	1170.95	1203.3
	1170.95	1203.3
	1494.97	2069.08
	1494.97	2069.08
	1494.97	2069.08
	1305.76	1987.51
	1305.76	1987.51
	1305.76	1987.51
	961.73	1825.38
	961.73	1825.38
	961.73	1825.38
	1419.11	1414
	1419.11	1414
	1419.11	1414
	1167.24	1414.62
	1167.24	1414.62
	1167.24	1414.62
	1117.62	2091.11
	1117.62	2091.11
	1117.62	2091.11
	1229.19	1342.27
	1229.19	1342.27
	1229.19	1342.27
	1168.46	1881.51
	1168.46	1881.51
	1168.46	1881.51
	1601.4	1601.4
	1601.4	1601.4
	1601.4	1601.4
	1722.7	1660.03
	1722.7	1660.03
	1722.7	1660.03
	1450.54	2055.89
	1450.54	2055.89
	1450.54	2055.89
	1096.19	2069.32
	1096.19	2069.32
	1096.19	2069.32
	1135.78	1309
	1135.78	1309
	1135.78	1309
	1139	2018.87
	1139	2018.87
	1139	2018.87
	1676.08	1172.92
	1676.08	1172.92
	1676.08	1172.92
	1214	1113.49
	1214	1113.49
	1214	1113.49
	1420.13	1344.54
	1420.13	1344.54
	1420.13	1344.54
	1274.16	1411
	1274.16	1411
	1274.16	1411
	1805.32	1059.76
	1805.32	1059.76
	1805.32	1059.76
	1595.6	1908.73
	1595.6	1908.73
	1595.6	1908.73
	2252.14	2815.19
	2252.14	2815.19
	2252.14	2815.19
	1375.3	995
	1375.3	995
	1375.3	995
	1512.32	1665.46
	1512.32	1665.46
	1512.32	1665.46
	1439.49	3010.41
	1439.49	3010.41
	1439.49	3010.41
	1288.84	1551.11
	1288.84	1551.11
	1288.84	1551.11
	1771.89	1905.03
	1771.89	1905.03
	1771.89	1905.03
	1416.92	1693.43
	1416.92	1693.43
	1416.92	1693.43
	1520.4	2445.43
	1520.4	2445.43
	1520.4	2445.43
	1561.27	1652.95
	1561.27	1652.95
	1561.27	1652.95
	1511.4	1218.03
	1511.4	1218.03
	1511.4	1218.03
	1063.89	1092.84
	1063.89	1092.84
	1063.89	1092.84
	2042.04	2123
	2042.04	2123
	2042.04	2123
	1675.7	1459.84
	1675.7	1459.84
	1675.7	1459.84
	1925.65	1358.54
	1925.65	1358.54
	1925.65	1358.54
	1347.24	1281.54
	1347.24	1281.54
	1347.24	1281.54
	1302.54	1355.7
	1302.54	1355.7
	1302.54	1355.7
	1492.87	1408.22
	1492.87	1408.22
	1492.87	1408.22
	1491.11	1779.65
	1491.11	1779.65
	1491.11	1779.65
	1584.73	1450.08
	1584.73	1450.08
	1584.73	1450.08
	1512.27	1594.68
	1512.27	1594.68
	1512.27	1594.68
	1451.13	1348.46
	1451.13	1348.46
	1451.13	1348.46
	1560.16	1888.19
	1560.16	1888.19
	1560.16	1888.19
	1259.6	1330.68
	1259.6	1330.68
	1259.6	1330.68
	1487.4	1602.6
	1487.4	1602.6
	1487.4	1602.6
	1535.08	1380.05
	1535.08	1380.05
	1535.08	1380.05
	1570.03	2266.81
	1570.03	2266.81
	1570.03	2266.81
	1267	1139.65
	1267	1139.65
	1267	1139.65
	1166.79	1028.76
	1166.79	1028.76
	1166.79	1028.76
	1379.76	1367.76
	1379.76	1367.76
	1379.76	1367.76
	1256.73	2383.38
	1256.73	2383.38
	1256.73	2383.38
	1758.76	1192.38
	1758.76	1192.38
	1758.76	1192.38
	1232.16	3191.73
	1232.16	3191.73
	1232.16	3191.73
	1164.95	1591.4
	1164.95	1591.4
	1164.95	1591.4
	825.324	3331.43
	825.324	3331.43
	825.324	3331.43
	1421.78	1568.51
	1421.78	1568.51
	1421.78	1568.51
	1163.43	3089.24
	1163.43	3089.24
	1163.43	3089.24
	1166.4	1214.62
	1166.4	1214.62
	1166.4	1214.62
	1109.03	2482.84
	1109.03	2482.84
	1109.03	2482.84
	1686.16	1177.49
	1686.16	1177.49
	1686.16	1177.49
	1546.08	2151.08
	1546.08	2151.08
	1546.08	2151.08
	2144.14	1438.97
	2144.14	1438.97
	2144.14	1438.97
	1494.97	1348.27
	1494.97	1348.27
	1494.97	1348.27
	1283.76	1677.95
	1283.76	1677.95
	1283.76	1677.95
	1530.13	1699.35
	1530.13	1699.35
	1530.13	1699.35
	2531.86	1322.03
	2531.86	1322.03
	2531.86	1322.03
	1320.05	1117.81
	1320.05	1117.81
	1320.05	1117.81
	1223.92	1920.62
	1223.92	1920.62
	1223.92	1920.62
	1567.97	1438.13
	1567.97	1438.13
	1567.97	1438.13
	1261.6	1082.3
	1261.6	1082.3
	1261.6	1082.3
	1304	1729.24
	1304	1729.24
	1304	1729.24
	1701.38	1305.97
	1701.38	1305.97
	1701.38	1305.97
	921.189	1204.22
	921.189	1204.22
	921.189	1204.22
	1342.76	1576.4
	1342.76	1576.4
	1342.76	1576.4
	1307.57	1332.3
	1307.57	1332.3
	1307.57	1332.3
	1690.6	1291.3
	1690.6	1291.3
	1690.6	1291.3
	1197.6	5129.77
	1197.6	5129.77
	1197.6	5129.77
	1243.35	759.432
	1243.35	759.432
	1243.35	759.432
	1926.33	1370.57
	1926.33	1370.57
	1926.33	1370.57
	1252.27	1949.78
	1252.27	1949.78
	1252.27	1949.78
	1382.73	2124.08
	1382.73	2124.08
	1382.73	2124.08
	704.135	1431.35
	704.135	1431.35
	704.135	1431.35
	1366.95	2351.24
	1366.95	2351.24
	1366.95	2351.24
	1356.32	1242.6
	1356.32	1242.6
	1356.32	1242.6
	1188.68	1479.16
	1188.68	1479.16
	1188.68	1479.16
	1708.27	1669.08
	1708.27	1669.08
	1708.27	1669.08
	1826.13	2678.93
	1826.13	2678.93
	1826.13	2678.93
	908.946	1401.73
	908.946	1401.73
	908.946	1401.73
	1122.65	5870.25
	1122.65	5870.25
	1122.65	5870.25
	1178.73	1357.89
	1178.73	1357.89
	1178.73	1357.89
	1203.03	1421.05
	1203.03	1421.05
	1203.03	1421.05
	1251.19	1745.76
	1251.19	1745.76
	1251.19	1745.76
	1219.24	1822.51
	1219.24	1822.51
	1219.24	1822.51
	1226.7	1711.49
	1226.7	1711.49
	1226.7	1711.49
	1518.62	2168.62
	1518.62	2168.62
	1518.62	2168.62
	1334.54	2246.81
	1334.54	2246.81
	1334.54	2246.81
	1677.6	1498.16
	1677.6	1498.16
	1677.6	1498.16
	1249.19	1192.11
	1249.19	1192.11
	1249.19	1192.11
	1357.7	1118.7
	1357.7	1118.7
	1357.7	1118.7
	1903.98	1703.65
	1903.98	1703.65
	1903.98	1703.65
	1198.95	991.568
	1198.95	991.568
	1198.95	991.568
	1884.7	1190.46
	1884.7	1190.46
	1884.7	1190.46
	1936.1	1841.46
	1936.1	1841.46
	1936.1	1841.46
	1621.49	2796.21
	1621.49	2796.21
	1621.49	2796.21
	1596.3	1619.3
	1596.3	1619.3
	1596.3	1619.3
	1290.22	1337.89
	1290.22	1337.89
	1290.22	1337.89
	1392.95	1413.49
	1392.95	1413.49
	1392.95	1413.49
	1358.95	2968
	1358.95	2968
	1358.95	2968
	2093.78	959.54
	2093.78	959.54
	2093.78	959.54
	2023.89	1209.46
	2023.89	1209.46
	2023.89	1209.46
	1135.03	1010.84
	1135.03	1010.84
	1135.03	1010.84
	1236.35	1833.87
	1236.35	1833.87
	1236.35	1833.87
	1198.08	1043.19
	1198.08	1043.19
	1198.08	1043.19
	2228.84	1026.95
	2228.84	1026.95
	2228.84	1026.95
	1338.65	1435.65
	1338.65	1435.65
	1338.65	1435.65
	3148.95	1025.35
	3148.95	1025.35
	3148.95	1025.35
	1276.27	1702.73
	1276.27	1702.73
	1276.27	1702.73
	1173.57	1418.32
	1173.57	1418.32
	1173.57	1418.32
	1109.54	1370.54
	1109.54	1370.54
	1109.54	1370.54
	1455.81	1143.6
	1455.81	1143.6
	1455.81	1143.6
	1479.05	5820.73
	1479.05	5820.73
	1479.05	5820.73
	1182.16	1667.35
	1182.16	1667.35
	1182.16	1667.35
	955.865	1082.19
	955.865	1082.19
	955.865	1082.19
	1666.62	4299.28
	1666.62	4299.28
	1666.62	4299.28
	994.622	2852.41
	994.622	2852.41
	994.622	2852.41
	1489.95	1213.6
	1489.95	1213.6
	1489.95	1213.6
	1577.06	2286.95
	1577.06	2286.95
	1577.06	2286.95
	1449.6	1437.65
	1449.6	1437.65
	1449.6	1437.65
	1196.32	1564.49
	1196.32	1564.49
	1196.32	1564.49
	1911.4	1323.08
	1911.4	1323.08
	1911.4	1323.08
	1156.43	1175.62
	1156.43	1175.62
	1156.43	1175.62
	1385.3	1709.95
	1385.3	1709.95
	1385.3	1709.95
	1947.81	2358.15
	1947.81	2358.15
	1947.81	2358.15
	1076.3	1433.4
	1076.3	1433.4
	1076.3	1433.4
	1798.19	1804.81
	1798.19	1804.81
	1798.19	1804.81
	1097.38	1767.13
	1097.38	1767.13
	1097.38	1767.13
	3789.3	1245.35
	3789.3	1245.35
	3789.3	1245.35
	1166.19	1826.08
	1166.19	1826.08
	1166.19	1826.08
	1482.84	1074.6
	1482.84	1074.6
	1482.84	1074.6
	1467.6	3978.32
	1467.6	3978.32
	1467.6	3978.32
	1142.3	1354.27
	1142.3	1354.27
	1142.3	1354.27
	1082.65	1321.05
	1082.65	1321.05
	1082.65	1321.05
	1616.84	2544.35
	1616.84	2544.35
	1616.84	2544.35
	1054.95	1035.08
	1054.95	1035.08
	1054.95	1035.08
	1644.13	1468.76
	1644.13	1468.76
	1644.13	1468.76
	1423.13	1068.68
	1423.13	1068.68
	1423.13	1068.68
	1370.21	1183.57
	1370.21	1183.57
	1370.21	1183.57
	1751.92	1192.22
	1751.92	1148
	1751.92	1192.22
	1199.35	1148
	1199.35	1192.22
	1199.35	1148
	1287.16	7329.23
	1287.16	7329.23
	1287.16	7329.23
	1462.27	1605.22
	1462.27	1605.22
	1462.27	1605.22
	1206.84	1321.38
	1206.84	1321.38
	1206.84	1321.38
	1308.81	1157.49
	1308.81	1157.49
	1308.81	1157.49
	1328.6	1336
	1328.6	1336
	1328.6	1336
	1262.76	1905.22
	1262.76	1905.22
	1262.76	1905.22
	1619.13	924.351
	1619.13	924.351
	1619.13	924.351
	1341.65	1021.81
	1341.65	1021.81
	1341.65	1021.81
	1028.84	1856.96
	1028.84	1856.96
	1028.84	1856.96
	1556.03	1659.15
	1556.03	1659.15
	1556.03	1659.15
	1411.13	1432.38
	1411.13	1432.38
	1411.13	1432.38
	1161.32	1348.54
	1393.27	1348.54
	1161.32	1348.54
	1393.27	1478.35
	1161.32	1478.35
	1393.27	1478.35
	1435.43	1749.13
	1435.43	1749.13
	1435.43	1749.13
	1804.24	1447.95
	1804.24	1447.95
	1804.24	1447.95
	1170.27	1420.16
	1170.27	1420.16
	1170.27	1420.16
	1473.7	1430.51
[truncated: 6,008 more rows]

## Sheet: Intensity FBAR
< 1000	< 1500	< 2000	> 2000
44.678	117.243	175.173	87.6487
44.678	117.243	175.173	87.6487
44.678	117.243	175.173	87.6487
69.7007	212.526	76.973	224.487
69.7007	212.526	76.973	224.487
69.7007	212.526	76.973	224.487
77.8192	75.973	59.4595	1162
77.8192	75.973	59.4595	1162
77.8192	75.973	59.4595	1162
63.32	75.2703	86.7838	62.8108
63.32	75.2703	86.7838	62.8108
63.32	75.2703	86.7838	62.8108
63	281.459	94.8919	707.969
63	281.459	94.8919	707.969
63	281.459	94.8919	707.969
72.2044	140.108	69.1892	70.6757
72.2044	140.108	69.1892	70.6757
72.2044	140.108	69.1892	70.6757
74.9189	64.8378	66.5946	52.1538
74.9189	64.8378	66.5946	52.1538
74.9189	64.8378	66.5946	52.1538
61.4972	267.541	98.4595	69.8108
61.4972	267.541	98.4595	69.8108
61.4972	267.541	98.4595	69.8108
131.054	69.7027	101.784	77.5405
131.054	69.7027	101.784	77.5405
131.054	69.7027	101.784	77.5405
133.135	65.6216	61.054	84.9231
133.135	65.6216	61.054	84.9231
133.135	65.6216	61.054	84.9231
40.4324	466.108	63.1892	922.324
40.4324	466.108	63.1892	922.324
40.4324	466.108	63.1892	922.324
66.9167	242.297	226.784	156.081
66.9167	242.297	226.784	156.081
66.9167	242.297	226.784	156.081
72.7297	143.811	146.703	63.027
72.7297	143.811	146.703	63.027
72.7297	143.811	146.703	63.027
134	64.2703	69.4054	75.2703
134	64.2703	69.4054	75.2703
134	64.2703	69.4054	75.2703
65.3107	160.73	138.081	58.8919
65.3107	160.73	138.081	58.8919
65.3107	160.73	138.081	58.8919
65.25	471.077	62.6216	128.865
65.25	471.077	62.6216	128.865
65.25	471.077	62.6216	128.865
107.297	59	1190.91	702.054
107.297	59	1190.91	702.054
107.297	59	1190.91	702.054
51.3243	68.0541	67.4595	52.2432
51.3243	82.3243	67.4595	52.2432
51.3243	68.0541	67.4595	52.2432
52.2847	82.3243	201.432	161.513
52.2847	68.0541	201.432	161.513
52.2847	82.3243	201.432	161.513
102.213	66.027	74.973	91.0541
102.213	66.027	74.973	91.0541
102.213	66.027	74.973	91.0541
55.4054	153.216	42.7568	84.9459
55.4054	153.216	42.7568	84.9459
55.4054	153.216	42.7568	84.9459
152.919	143.054	45.027	67.4054
152.919	143.054	45.027	67.4054
152.919	143.054	45.027	67.4054
57.3955	45.8378	80.8649	61.4595
57.3955	45.8378	80.8649	61.4595
57.3955	45.8378	80.8649	61.4595
70.9887	57.4054	82.3513	54.0811
70.9887	57.4054	82.3513	54.0811
70.9887	57.4054	82.3513	54.0811
240.865	43.8649	50.6216	104.054
240.865	43.8649	50.6216	104.054
240.865	43.8649	50.6216	104.054
60.0875	80.4865	55.1351	330.25
60.0875	80.4865	55.1351	330.25
60.0875	80.4865	55.1351	330.25
156.027	58.2432	1245.73	488.135
156.027	58.2432	1245.73	488.135
156.027	58.2432	1245.73	488.135
70.5405	275.595	70.5946	58.7568
70.5405	275.595	70.5946	58.7568
70.5405	275.595	70.5946	58.7568
169.135	64.8108	50.7027	547.514
169.135	64.8108	50.7027	547.514
169.135	64.8108	50.7027	547.514
76.2162	65.5135	57.8108	191.243
76.2162	65.5135	57.8108	191.243
76.2162	65.5135	57.8108	191.243
56.7568	181.243	351.162	69.9459
56.7568	181.243	351.162	69.9459
56.7568	181.243	351.162	69.9459
117.811	48.8378	242.568	131.541
117.811	48.8378	242.568	131.541
117.811	48.8378	242.568	131.541
105.351	68.5946	65.8649	53.8649
105.351	68.5946	65.8649	53.8649
105.351	68.5946	65.8649	53.8649
77.2432	260.568	74.6487	60.3784
77.2432	260.568	74.6487	60.3784
77.2432	260.568	74.6487	60.3784
67.675	40.3784	64.3513	1599.89
67.675	40.3784	64.3513	1599.89
67.675	40.3784	64.3513	1599.89
52.5676	66.1081	551.378	283.269
52.5676	66.1081	551.378	283.269
52.5676	66.1081	551.378	283.269
129.541	514.096	328.946	98.9459
129.541	514.096	328.946	98.9459
129.541	514.096	328.946	98.9459
357.649	53.1081	45.973	92.0811
357.649	53.1081	45.973	92.0811
357.649	53.1081	45.973	92.0811
53.9562	60.2703	838.703	60.3784
53.9562	60.2703	838.703	60.3784
53.9562	60.2703	838.703	60.3784
134.27	111.216	53.5135	178.649
134.27	111.216	53.5135	178.649
134.27	111.216	53.5135	178.649
86.973	81.8649	42.2432	92.4054
86.973	81.8649	42.2432	92.4054
86.973	81.8649	42.2432	92.4054
227.595	55.6757	76.8108	219.676
227.595	55.6757	76.8108	219.676
227.595	55.6757	76.8108	219.676
75.5135	53.3513	147.189	60.6216
75.5135	53.3513	147.189	60.6216
75.5135	53.3513	147.189	60.6216
128.1	244.622	64.5135	62.054
128.1	244.622	64.5135	62.054
128.1	244.622	64.5135	62.054
301.757	71.2162	53.2162	50.8378
301.757	71.2162	53.2162	50.8378
301.757	71.2162	53.2162	50.8378
218.027	65.2973	241.865	59.4054
218.027	65.2973	241.865	59.4054
218.027	65.2973	241.865	59.4054
60.7568	71.4865	82.0541	48.054
60.7568	71.4865	82.0541	48.054
60.7568	71.4865	82.0541	48.054
260.676	48.5135	73.027	509.649
260.676	48.5135	73.027	509.649
260.676	48.5135	73.027	509.649
70.4599	378.73	343.568	467.757
70.4599	378.73	343.568	467.757
70.4599	378.73	343.568	467.757
51.8108	63.3243	698.189	56.3784
51.8108	63.3243	698.189	56.3784
51.8108	63.3243	698.189	56.3784
198.838	167.108	75	47.2703
198.838	167.108	75	47.2703
198.838	167.108	75	47.2703
170.297	74.1622	78.4865	421.838
170.297	74.1622	78.4865	421.838
170.297	74.1622	78.4865	421.838
62.2	87.973	80.7838	69.5135
62.2	87.973	80.7838	69.5135
62.2	87.973	80.7838	69.5135
56.6186	65.9189	53.946	73.4324
56.6186	65.9189	53.946	73.4324
56.6186	65.9189	53.946	73.4324
69.95	307.324	72.4324	938.216
69.95	307.324	72.4324	938.216
69.95	307.324	72.4324	938.216
171.351	271.892	59.8919	355.649
171.351	271.892	59.8919	355.649
171.351	271.892	59.8919	355.649
61.3243	62.973	58.8649	74.2973
61.3243	62.973	58.8649	74.2973
61.3243	62.973	58.8649	74.2973
175.946	109.189	64.0811	58.6487
175.946	109.189	64.0811	58.6487
175.946	109.189	64.0811	58.6487
73.0811	60.8919	2938.84	67.7838
73.0811	60.8919	2938.84	67.7838
73.0811	60.8919	2938.84	67.7838
112.622	54.5135	105.513	67.6487
112.622	54.5135	105.513	67.6487
112.622	54.5135	105.513	67.6487
53.6757	64.2432	203.892	62.8649
53.6757	64.2432	203.892	62.8649
53.6757	64.2432	203.892	62.8649
92.125	569.162	50.1081	524.649
92.125	569.162	50.1081	524.649
92.125	569.162	50.1081	524.649
63.8378	61.2703	78.4054	164.811
63.8378	61.2703	78.4054	164.811
63.8378	61.2703	78.4054	164.811
49.2432	61.0811	90.8108	51.1892
49.2432	61.0811	90.8108	51.1892
49.2432	61.0811	90.8108	51.1892
71.8378	65.7838	58.4865	129.378
71.8378	65.7838	58.4865	129.378
71.8378	65.7838	58.4865	129.378
123.892	53.027	61.973	805.622
123.892	53.027	61.973	805.622
123.892	53.027	61.973	805.622
51.3571	226.703	130.487	55.3243
51.3571	226.703	130.487	55.3243
51.3571	226.703	130.487	55.3243
326.946	77.3513	50.9189	711.892
326.946	77.3513	50.9189	711.892
326.946	77.3513	50.9189	711.892
61.2162	498.973	731.784	71.2703
61.2162	498.973	731.784	71.2703
61.2162	498.973	731.784	71.2703
63.5676	60.9189	48.7027	59.5405
63.5676	60.9189	48.7027	59.5405
63.5676	60.9189	48.7027	59.5405
54.054	78.4595	719.676	82.3513
54.054	78.4595	719.676	82.3513
54.054	78.4595	719.676	82.3513
72.1346	29.973	45.8378	78.7297
72.1346	29.973	45.8378	78.7297
72.1346	29.973	45.8378	78.7297
72.2	73.1351	73.027	201.784
72.2	73.1351	73.027	201.784
72.2	73.1351	73.027	201.784
234.784	64.7027	86.8378	52.3784
234.784	64.7027	86.8378	52.3784
234.784	64.7027	86.8378	52.3784
96.7853	63.5676	46.4324	654.27
96.7853	63.5676	46.4324	654.27
96.7853	63.5676	46.4324	654.27
151.973	167.199	58.1622	47.2703
151.973	167.199	58.1622	47.2703
151.973	167.199	58.1622	47.2703
86.5135	77.5676	67.1892	92.3269
86.5135	77.5676	67.1892	92.3269
86.5135	77.5676	67.1892	92.3269
62.6216	53.8919	105.946	60.8649
62.6216	53.8919	105.946	60.8649
62.6216	53.8919	105.946	60.8649
67.6346	70.5405	232.846	101.405
67.6346	70.5405	232.846	101.405
67.6346	70.5405	232.846	101.405
186.676	86.6216	60.054	65.5676
186.676	86.6216	60.054	65.5676
186.676	86.6216	60.054	65.5676
387.351	617.324	173.162	2954.62
387.351	617.324	173.162	2954.62
387.351	617.324	173.162	2954.62
195.919	64.8919	54.4054	57.973
195.919	64.8919	54.4054	57.973
195.919	64.8919	54.4054	57.973
46.027	148.919	115.784	287.297
46.027	148.919	115.784	287.297
46.027	148.919	115.784	287.297
63.3513	282.081	51.6757	64.9189
63.3513	282.081	51.6757	64.9189
63.3513	282.081	51.6757	64.9189
65.5405	247.541	88.7297	234.351
65.5405	247.541	88.7297	234.351
65.5405	247.541	88.7297	234.351
70.1856	69.973	48.8378	206.459
70.1856	69.973	48.8378	206.459
70.1856	69.973	48.8378	206.459
81.1081	59.9189	64.2973	79.0811
81.1081	59.9189	64.2973	79.0811
81.1081	59.9189	64.2973	79.0811
265.054	105.757	75.4595	69.027
265.054	105.757	75.4595	69.027
265.054	105.757	75.4595	69.027
53.9732	50.4865	68.1351	76.3784
53.9732	50.4865	68.1351	76.3784
53.9732	50.4865	68.1351	76.3784
53.5405	82.3784	83.1351	67.8108
53.5405	82.3784	83.1351	67.8108
53.5405	82.3784	83.1351	67.8108
85.2308	52.0811	49.8649	280
85.2308	52.0811	49.8649	280
85.2308	52.0811	49.8649	280
125.73	52.946	377.865	1089.62
125.73	52.946	377.865	1089.62
125.73	52.946	377.865	1089.62
62.2703	66.4865	77.4865	613.162
62.2703	66.4865	77.4865	613.162
62.2703	66.4865	77.4865	613.162
103.73	51.9189	497.595	77.4865
103.73	51.9189	497.595	77.4865
103.73	51.9189	497.595	77.4865
339.054	184.135	68.5676	1121
339.054	184.135	68.5676	1121
339.054	184.135	68.5676	1121
40.6487	513.486	302.757	229.649
40.6487	513.486	302.757	229.649
40.6487	513.486	302.757	229.649
77.4595	164.432	51.027	116.432
77.4595	164.432	51.027	116.432
77.4595	164.432	51.027	116.432
63.0375	58.6482	71.9459	143.27
63.0375	58.6482	71.9459	143.27
63.0375	58.6482	71.9459	143.27
63	349.054	58.4865	50.6487
63	349.054	58.4865	50.6487
63	349.054	58.4865	50.6487
59.7838	72.4865	78.6216	789.973
59.7838	72.4865	78.6216	789.973
59.7838	72.4865	78.6216	789.973
214.432	87.5135	583.649	52.5946
214.432	87.5135	583.649	52.5946
214.432	87.5135	583.649	52.5946
55.2432	56.3513	49.2703	96.1081
55.2432	56.3513	49.2703	96.1081
55.2432	56.3513	49.2703	96.1081
69.3625	65.8649	74.7838	59.8462
69.3625	65.8649	124.595	59.8462
69.3625	65.8649	74.7838	59.8462
73.1058	274.081	124.595	102.135
73.1058	274.081	74.7838	102.135
73.1058	274.081	124.595	102.135
53.4054	95.0541	78.5676	159.703
53.4054	95.0541	78.5676	159.703
53.4054	95.0541	78.5676	159.703
49.5405	75.8919	55.3243	57.5676
49.5405	75.8919	55.3243	57.5676
49.5405	75.8919	55.3243	57.5676
200.919	71.7027	78.1081	4747.62
200.919	71.7027	78.1081	4747.62
200.919	71.7027	78.1081	4747.62
58.5946	576.892	53	989.058
58.5946	576.892	53	989.058
58.5946	576.892	53	989.058
54.3036	57.5676	61.1351	70.5946
54.3036	57.5676	61.1351	70.5946
54.3036	57.5676	61.1351	70.5946
225.432	92.5676	68.8378	59.1892
225.432	92.5676	68.8378	59.1892
225.432	92.5676	68.8378	59.1892
59.8077	54.9189	67.2973	50.7297
59.8077	54.9189	67.2973	50.7297
59.8077	54.9189	67.2973	50.7297
79.3513	70.8919	61.8919	64.8108
79.3513	70.8919	61.8919	64.8108
79.3513	70.8919	61.8919	64.8108
198.432	99.5676	346.135	245.919
198.432	99.5676	346.135	245.919
198.432	99.5676	346.135	245.919
55.7838	60.7838	58.8654	73.4595
55.7838	60.7838	58.8654	73.4595
55.7838	60.7838	58.8654	73.4595
54.2973	487.135	75.8378	79.7568
54.2973	487.135	75.8378	79.7568
54.2973	487.135	75.8378	79.7568
229.333	303.324	56.2703	65.0811
229.333	303.324	56.2703	65.0811
229.333	303.324	56.2703	65.0811
135.189	336.081	40.1622	169.703
135.189	336.081	40.1622	169.703
135.189	336.081	40.1622	169.703
51.3513	535.189	45.8108	65.3784
51.3513	535.189	45.8108	65.3784
51.3513	535.189	45.8108	65.3784
66.925	79.5135	252.27	100.216
66.925	79.5135	252.27	100.216
66.925	79.5135	252.27	100.216
66.6757	76.7027	55.4324	79.2973
66.6757	76.7027	55.4324	79.2973
66.6757	76.7027	55.4324	79.2973
55.7838	371.405	156.216	75.8378
55.7838	371.405	156.216	75.8378
55.7838	371.405	156.216	75.8378
73.2432	65.8919	52.1351	54.5946
73.2432	65.8919	52.1351	54.5946
73.2432	65.8919	52.1351	54.5946
63.5375	179.676	55.7838	1457.81
63.5375	179.676	55.7838	1457.81
63.5375	179.676	55.7838	1457.81
65.2436	79.3513	64.7027	39.027
65.2436	79.3513	64.7027	39.027
65.2436	79.3513	64.7027	39.027
259.054	124.892	101.027	557.865
259.054	124.892	101.027	557.865
259.054	124.892	101.027	557.865
238.622	53.2375	69.3243	53.5405
238.622	53.2375	69.3243	53.5405
238.622	53.2375	69.3243	53.5405
50.1622	89.2973	197	491.73
50.1622	89.2973	197	491.73
50.1622	89.2973	197	491.73
124.108	135.297	74.2703	81.7027
124.108	135.297	74.2703	81.7027
124.108	135.297	74.2703	81.7027
150.838	61.5405	190.513	73.6216
150.838	61.5405	190.513	73.6216
150.838	61.5405	190.513	73.6216
193.703	57.3784	59.7568	54.973
193.703	57.3784	59.7568	54.973
193.703	57.3784	59.7568	54.973
67.4595	68.4595	59.6216	841.27
67.4595	68.4595	59.6216	841.27
67.4595	68.4595	59.6216	841.27
65.2432	82.2162	393.378	144.27
65.2432	82.2162	393.378	144.27
65.2432	82.2162	393.378	144.27
554	462.784	63.027	54.8378
554	462.784	63.027	54.8378
554	462.784	63.027	54.8378
127.892	71.8378	1508.46	75.8919
127.892	71.8378	1508.46	75.8919
127.892	71.8378	1508.46	75.8919
54.3243	50.5946	1322.12	539.811
54.3243	50.5946	1322.12	539.811
54.3243	50.5946	1322.12	539.811
67.1622	85.0541	58.0811	1255.16
67.1622	85.0541	58.0811	1255.16
67.1622	85.0541	58.0811	1255.16
46.3513	46.3513	51.8919	582.27
46.3513	46.3513	51.8919	582.27
46.3513	46.3513	51.8919	582.27
62.6757	82.973	68.5946	63.7838
62.6757	82.973	68.5946	63.7838
62.6757	82.973	68.5946	63.7838
161.763	71.4595	53.3784	1267.19
161.763	71.4595	53.3784	1267.19
161.763	71.4595	53.3784	1267.19
63.3077	235.568	71.4324	67.6487
63.3077	235.568	71.4324	67.6487
63.3077	235.568	71.4324	67.6487
68.7297	65.2703	59.2973	59.973
68.7297	65.2703	59.2973	59.973
68.7297	65.2703	59.2973	59.973
74.2973	91.275	97.973	114.568
74.2973	91.275	97.973	114.568
74.2973	91.275	97.973	114.568
42.925	68.1351	64.3784	62.8378
42.925	68.1351	64.3784	62.8378
42.925	68.1351	64.3784	62.8378
81.5135	48.8378	54.2703	65.8108
81.5135	48.8378	54.2703	65.8108
81.5135	48.8378	54.2703	65.8108
244.351	82.3513	78.3513	394.811
244.351	82.3513	78.3513	394.811
244.351	82.3513	78.3513	394.811
250	487.081	57.3243	307.649
250	487.081	57.3243	307.649
250	487.081	57.3243	307.649
109.189	214	52.2432	708.946
109.189	214	52.2432	708.946
109.189	214	52.2432	708.946
67.0811	276.568	48.4054	48.7297
67.0811	276.568	48.4054	48.7297
67.0811	276.568	48.4054	48.7297
70.2973	85.9459	217.757	924.432
70.2973	85.9459	217.757	924.432
70.2973	85.9459	217.757	924.432
79.5405	71.4054	82.8108	1424.38
79.5405	71.4054	82.8108	1424.38
79.5405	71.4054	82.8108	1424.38
210.216	240.054	50.8108	122.351
210.216	240.054	50.8108	122.351
210.216	240.054	50.8108	122.351
461.838	70.4595	150.568	104.173
461.838	70.4595	150.568	104.173
461.838	70.4595	150.568	104.173
73.5946	137.919	76.8649	63.7027
73.5946	137.919	76.8649	63.7027
73.5946	137.919	76.8649	63.7027
218.946	77.8378	71.5946	578.297
218.946	77.8378	71.5946	578.297
218.946	77.8378	71.5946	578.297
38.6487	132.297	48.2432	69.7568
38.6487	132.297	48.2432	69.7568
38.6487	132.297	48.2432	69.7568
58.2973	156.27	236.946	86.9459
58.2973	156.27	236.946	86.9459
58.2973	156.27	236.946	86.9459
106.27	63.2703	52.7838	87.6757
106.27	63.2703	52.7838	87.6757
106.27	63.2703	52.7838	87.6757
75.5135	42.6216	48.3243	95.5135
75.5135	42.6216	48.3243	95.5135
75.5135	42.6216	48.3243	95.5135
220.703	63.7297	65.7297	450.216
220.703	63.7297	65.7297	450.216
220.703	63.7297	65.7297	450.216
88.7027	57.4865	228.568	75
88.7027	57.4865	228.568	75
88.7027	57.4865	228.568	75
192	62.946	55.5405	75.5946
192	62.946	55.5405	75.5946
192	62.946	55.5405	75.5946
210.189	50.8919	46.6216	131.757
210.189	50.8919	46.6216	131.757
210.189	50.8919	46.6216	131.757
274.459	471.216	58.3513	55.6757
274.459	471.216	58.3513	55.6757
274.459	471.216	58.3513	55.6757
80.2973	59.5405	62.2973	153.568
80.2973	59.5405	62.2973	153.568
80.2973	59.5405	62.2973	153.568
75.973	58.9189	57.8108	407.973
75.973	58.9189	57.8108	407.973
75.973	58.9189	57.8108	407.973
61.5135	71	68.1622	1362.95
61.5135	71	68.1622	1362.95
61.5135	71	68.1622	1362.95
78.2973	71.1081	52.8649	145.676
78.2973	71.1081	52.8649	145.676
78.2973	71.1081	52.8649	145.676
89.2973	131.703	481.054	68.973
89.2973	131.703	481.054	68.973
89.2973	131.703	481.054	68.973
232.216	201.378	97.1622	4827.44
232.216	201.378	97.1622	4827.44
232.216	201.378	97.1622	4827.44
158.946	87.4054	111.324	75
158.946	87.4054	111.324	75
158.946	87.4054	111.324	75
77.8919	325.692	796.486	64.6579
77.8919	325.692	796.486	64.6579
77.8919	325.692	796.486	64.6579
64.1081	55.7027	96.2162	253.243
64.1081	55.7027	96.2162	253.243
64.1081	55.7027	96.2162	253.243
57.4375	67.6216	75.0811	656.351
57.4375	67.6216	75.0811	656.351
57.4375	67.6216	75.0811	656.351
72.8649	399.173	65.2973	82.6216
72.8649	399.173	65.2973	82.6216
72.8649	399.173	65.2973	82.6216
54.1892	284.973	193.243	172.459
54.1892	284.973	193.243	172.459
54.1892	284.973	193.243	172.459
84.9189	73.027	61	62.0577
84.9189	73.027	61	62.0577
84.9189	73.027	61	62.0577
111.487	720.635	607.946	1487.22
111.487	720.635	607.946	1487.22
111.487	720.635	607.946	1487.22
210.703	101.703	84.6216	127.919
210.703	101.703	84.6216	127.919
210.703	101.703	84.6216	127.919
143.838	116.919	69.1892	60.4595
143.838	116.919	69.1892	60.4595
143.838	116.919	69.1892	60.4595
55.425	81.4595	116.838	263.189
55.425	81.4595	116.838	263.189
55.425	81.4595	116.838	263.189
103.189	78.4745	58.7568	48.4595
103.189	78.4745	58.7568	48.4595
103.189	78.4745	58.7568	48.4595
69.8108	64.7568	61.946	71.6487
69.8108	64.7568	61.946	71.6487
69.8108	64.7568	61.946	71.6487
58.3513	92	69.1081	84.5946
58.3513	92	69.1081	84.5946
58.3513	92	69.1081	84.5946
77.7297	297.297	48.1622	47.1351
77.7297	297.297	48.1622	47.1351
77.7297	297.297	48.1622	47.1351
78.2432	136.973	269.216	57.946
78.2432	136.973	269.216	57.946
78.2432	136.973	269.216	57.946
118.27	85.1081	896.973	64.2973
118.27	85.1081	896.973	64.2973
118.27	85.1081	896.973	64.2973
222.541	52.2162	119.619	51.1351
222.541	52.2162	119.619	51.1351
222.541	52.2162	119.619	51.1351
64.4865	133.135	48.3513	85.0811
64.4865	133.135	48.3513	85.0811
64.4865	133.135	48.3513	85.0811
66.6216	86.6487	86.8108	1759.68
66.6216	86.6487	86.8108	1759.68
66.6216	86.6487	86.8108	1759.68
131	122.811	60.5946	74.4865
131	122.811	60.5946	74.4865
131	122.811	60.5946	74.4865
60.5946	70.1081	280.946	641.784
60.5946	70.1081	280.946	641.784
60.5946	70.1081	280.946	641.784
222.297	60.7027	64.3784	50.1622
222.297	60.7027	64.3784	50.1622
222.297	60.7027	64.3784	50.1622
264.027	99.027	88.0541	560
264.027	99.027	88.0541	560
264.027	99.027	88.0541	560
64.7115	115.243	83.7568	119.73
64.7115	115.243	83.7568	119.73
64.7115	115.243	83.7568	119.73
86.0811	51.4324	486.568	52.4324
86.0811	51.4324	486.568	52.4324
86.0811	51.4324	486.568	52.4324
56.7027	68.1351	630.27	104.811
56.7027	68.1351	630.27	104.811
56.7027	68.1351	630.27	104.811
88.4865	59.0811	69.2973	321.081
88.4865	59.0811	69.2973	321.081
88.4865	59.0811	69.2973	321.081
45.7838	808.189	53.2432	67.7027
45.7838	808.189	53.2432	67.7027
45.7838	808.189	53.2432	67.7027
51.3243	410.432	52.4865	508.054
51.3243	410.432	52.4865	508.054
51.3243	410.432	52.4865	508.054
72.7838	50.5676	60.2973	74.8919
72.7838	50.5676	60.2973	74.8919
72.7838	50.5676	60.2973	74.8919
54.575	412.216	57.1622	58.3243
54.575	412.216	57.1622	58.3243
54.575	412.216	57.1622	58.3243
133.865	126.27	82.8649	52.2703
133.865	126.27	82.8649	52.2703
133.865	126.27	82.8649	52.2703
53.5676	497.081	83.8919	62.2432
53.5676	497.081	83.8919	62.2432
53.5676	497.081	83.8919	62.2432
66.1892	65.7297	56.5676	213.73
66.1892	65.7297	56.5676	213.73
66.1892	65.7297	56.5676	213.73
82.7297	65.4054	64.2162	1837.3
82.7297	65.4054	64.2162	1837.3
82.7297	65.4054	64.2162	1837.3
172.027	63.946	182.757	275.703
172.027	63.946	182.757	275.703
172.027	63.946	182.757	275.703
369.054	59.946	65.7568	64.0541
369.054	59.946	65.7568	64.0541
369.054	59.946	65.7568	64.0541
227.108	63.2647	61.2162	1387.92
227.108	63.2647	61.2162	1387.92
227.108	63.2647	61.2162	1387.92
56.1081	57.4865	111.432	47.5946
56.1081	57.4865	111.432	47.5946
56.1081	57.4865	111.432	47.5946
69.2162	53.7027	205.108	573.081
69.2162	53.7027	205.108	573.081
69.2162	53.7027	205.108	573.081
54.5135	72.2703	56.1351	261.216
54.5135	72.2703	56.1351	261.216
54.5135	72.2703	56.1351	261.216
106.784	67.2432	63.2432	360
106.784	67.2432	63.2432	360
106.784	67.2432	63.2432	360
256.649	55.4595	72.3513	292.757
256.649	55.4595	72.3513	292.757
256.649	55.4595	72.3513	292.757
264.459	85.3243	55.7027	129.838
264.459	85.3243	55.7027	129.838
264.459	85.3243	55.7027	129.838
59.7838	146.757	65.5946	176.432
59.7838	146.757	65.5946	176.432
59.7838	146.757	65.5946	176.432
59.4865	36.5676	62.5405	123.46
59.4865	36.5676	62.5405	123.46
59.4865	36.5676	62.5405	123.46
64.027	82.7568	100.216	471.622
64.027	82.7568	100.216	471.622
64.027	82.7568	100.216	471.622
145.135	40.4865	43.8919	378.324
145.135	40.4865	43.8919	378.324
145.135	40.4865	43.8919	378.324
167.946	73.6216	133.73	155.405
167.946	73.6216	133.73	155.405
167.946	73.6216	133.73	155.405
457.108	54.1622	77.3784	62.3784
457.108	54.1622	77.3784	62.3784
457.108	54.1622	77.3784	62.3784
269.216	64.7297	82.9189	70.973
269.216	64.7297	82.9189	70.973
269.216	64.7297	82.9189	70.973
36.1081	70.1351	145.892	57.3784
36.1081	70.1351	145.892	57.3784
36.1081	70.1351	145.892	57.3784
52.946	48.1892	72.4595	935.162
52.946	48.1892	72.4595	935.162
52.946	48.1892	72.4595	935.162
102.946	78.5135	125.676	63.027
102.946	78.5135	125.676	63.027
102.946	78.5135	125.676	63.027
144.324	249	71.1622	80.8919
144.324	249	71.1622	80.8919
144.324	249	71.1622	80.8919
63.4595	66.9459	76.5135	63.1622
63.4595	66.9459	76.5135	63.1622
63.4595	66.9459	76.5135	63.1622
80	94.6757	244.027	118.595
80	94.6757	244.027	118.595
80	94.6757	244.027	118.595
69.0811	56.2973	78.8108	151.838
69.0811	56.2973	78.8108	151.838
69.0811	56.2973	78.8108	151.838
64.6907	50.2703	67.0541	49.1892
64.6907	50.2703	67.0541	49.1892
64.6907	50.2703	67.0541	49.1892
51.973	70.2703	201.27	75.3513
51.973	70.2703	201.27	75.3513
51.973	70.2703	201.27	75.3513
80.5676	358.892	607.378	372.865
80.5676	358.892	607.378	372.865
80.5676	358.892	607.378	372.865
65.8919	46.4865	58.027	168.919
65.8919	46.4865	58.027	168.919
65.8919	46.4865	58.027	168.919
273.649	366.135	70.5135	372.459
273.649	366.135	70.5135	372.459
273.649	366.135	70.5135	372.459
72.2973	364.081	67.0811	1622.24
72.2973	364.081	67.0811	1622.24
72.2973	364.081	67.0811	1622.24
57.1892	52.3513	77.5946	866.385
57.1892	52.3513	77.5946	866.385
57.1892	52.3513	77.5946	866.385
46.8649	67.8108	41.9189	648.243
46.8649	67.8108	41.9189	648.243
46.8649	67.8108	41.9189	648.243
110.838	55.5946	78.5135	435.595
110.838	55.5946	78.5135	435.595
110.838	55.5946	78.5135	435.595
52.7297	56.2432	70.1622	263.865
52.7297	56.2432	70.1622	263.865
52.7297	56.2432	70.1622	263.865
47.1081	96.8649	73.7297	296.135
47.1081	96.8649	73.7297	296.135
47.1081	96.8649	73.7297	296.135
203.27	68.4595	71.2432	48.4595
203.27	68.4595	71.2432	48.4595
203.27	68.4595	71.2432	48.4595
64.3784	87.4054	1202.89	712
64.3784	87.4054	1202.89	712
64.3784	87.4054	1202.89	712
71.5946	73.0541	576.75	783.46
71.5946	73.0541	576.75	783.46
71.5946	73.0541	576.75	783.46
52.4133	117.946	437.946	61.5135
52.4133	117.946	437.946	61.5135
52.4133	117.946	437.946	61.5135
221.459	313.541	66.7838	208.324
221.459	313.541	66.7838	208.324
221.459	313.541	66.7838	208.324
618.811	465.243	70.0541	899.108
618.811	465.243	70.0541	899.108
618.811	465.243	70.0541	899.108
50.2432	113.757	78.7838	375.378
50.2432	113.757	78.7838	375.378
50.2432	113.757	78.7838	375.378
184.595	103.865	73.3784	1518.81
184.595	103.865	73.3784	1518.81
184.595	103.865	73.3784	1518.81
76.1622	66.973	338.459	218.838
76.1622	66.973	338.459	218.838
76.1622	66.973	338.459	218.838
43.054	55.525	40.7568	61.2162
43.054	55.525	40.7568	61.2162
43.054	55.525	40.7568	61.2162
63.8108	357	107.162	167.703
63.8108	357	107.162	167.703
63.8108	357	107.162	167.703
278.784	230.73	48.973	51.946
278.784	230.73	48.973	51.946
278.784	230.73	48.973	51.946
103.919	461.595	67.7297	2005.73
103.919	461.595	67.7297	2005.73
103.919	461.595	67.7297	2005.73
55.4054	67.6487	75	237.351
55.4054	67.6487	75	237.351
55.4054	67.6487	75	237.351
45.054	62.4054	335.784	54.7297
45.054	62.4054	335.784	54.7297
45.054	62.4054	335.784	54.7297
138.459	407.108	71.7027	757.486
138.459	407.108	71.7027	757.486
138.459	407.108	71.7027	757.486
131.27	412.73	79.3513	64.4875
131.27	412.73	79.3513	64.4875
131.27	412.73	79.3513	64.4875
281.919	1264.27	96.8649	1377.22
281.919	1264.27	96.8649	1377.22
281.919	1264.27	96.8649	1377.22
62.4324	47.7838	61.8108	69.9189
62.4324	47.7838	61.8108	69.9189
62.4324	47.7838	61.8108	69.9189
216.432	73.1081	53.1081	132.432
216.432	73.1081	53.1081	132.432
216.432	73.1081	53.1081	132.432
160.892	112.378	356.946	1218.79
160.892	112.378	356.946	1218.79
160.892	112.378	356.946	1218.79
65.4054	86.8919	64.5135	79
65.4054	86.8919	64.5135	79
65.4054	86.8919	64.5135	79
67.3784	55.054	74.2973	1403.22
67.3784	55.054	74.2973	1403.22
67.3784	55.054	74.2973	1403.22
52.973	92.5135	73.1622	79.5135
52.973	92.5135	73.1622	79.5135
52.973	92.5135	73.1622	79.5135
66.6216	174.892	60.7297	46.2703
66.6216	174.892	60.7297	46.2703
66.6216	174.892	60.7297	46.2703
62.567	109.324	80.973	156.432
62.567	109.324	80.973	156.432
62.567	109.324	80.973	156.432
67.8875	243.378	86.1081	1636.08
67.8875	243.378	86.1081	1636.08
67.8875	243.378	86.1081	1636.08
66.6487	333.135	69.8919	72.5135
66.6487	333.135	69.8919	72.5135
66.6487	333.135	69.8919	72.5135
1392.84	71.5676	91.7838	68.2308
1392.84	71.5676	91.7838	68.2308
1392.84	71.5676	91.7838	68.2308
59.4595	280.692	47.8378	1174.7
59.4595	280.692	47.8378	1174.7
59.4595	280.692	47.8378	1174.7
85.2432	91.3784	456.568	897.595
85.2432	91.3784	456.568	897.595
85.2432	91.3784	456.568	897.595
219.892	74.0811	89.8108	54.6731
219.892	74.0811	89.8108	54.6731
219.892	74.0811	89.8108	54.6731
64.2703	68.7297	289.703	109.595
64.2703	68.7297	289.703	109.595
64.2703	68.7297	289.703	109.595
129.297	212.378	60.0811	1964.38
129.297	212.378	60.0811	1964.38
129.297	212.378	60.0811	1964.38
61.5135	58.9189	70.973	281.568
61.5135	58.9189	70.973	281.568
61.5135	58.9189	70.973	281.568
93.7027	63.9189	107.216	105.081
93.7027	63.9189	107.216	105.081
93.7027	63.9189	107.216	105.081
66.0811	83.3513	53.6487	291.973
66.0811	83.3513	53.6487	291.973
66.0811	83.3513	53.6487	291.973
61.35	56.7568	136.189	188.919
61.35	56.7568	136.189	188.919
61.35	56.7568	136.189	188.919
41.1081	128.757	53.3784	260.838
41.1081	128.757	53.3784	260.838
41.1081	128.757	53.3784	260.838
90.5676	189.243	87.3784	71.9189
90.5676	189.243	87.3784	71.9189
90.5676	189.243	87.3784	71.9189
235.541	107.216	167.487	60.1456
235.541	107.216	167.487	60.1456
235.541	107.216	167.487	60.1456
206.784	104.351	267.459	80.8649
206.784	104.351	267.459	80.8649
206.784	104.351	267.459	80.8649
276.432	69.2973	389.243	107.324
276.432	69.2973	389.243	107.324
276.432	69.2973	389.243	107.324
258.324	487.054	71.8919	67.575
258.324	487.054	71.8919	67.575
258.324	487.054	71.8919	67.575
71.7297	66.8108	580.622	2362.03
71.7297	66.8108	580.622	2362.03
71.7297	66.8108	580.622	2362.03
69.3513	134.432	47.7297	1692.6
69.3513	134.432	47.7297	1692.6
69.3513	134.432	47.7297	1692.6
130.027	498.378	78.8649	1626.49
130.027	498.378	78.8649	1626.49
130.027	498.378	78.8649	1626.49
60.973	77.1351	60.054	1045.43
60.973	77.1351	60.054	1045.43
60.973	77.1351	60.054	1045.43
59.0811	206.703	71.973	1489.45
59.0811	206.703	71.973	1489.45
59.0811	206.703	71.973	1489.45
247.784	1021.99	48.054	1932.65
247.784	1021.99	48.054	1932.65
247.784	1021.99	48.054	1932.65
66.7838	92.2432	52	572.189
66.7838	92.2432	52	572.189
66.7838	92.2432	52	572.189
186.757	45.0811	69.2432	1638.81
186.757	45.0811	69.2432	1638.81
186.757	45.0811	69.2432	1638.81
69.6757	93.2703	84.5405	97.1622
69.6757	93.2703	84.5405	97.1622
69.6757	93.2703	84.5405	97.1622
79.7027	60.946	66.3784	854.243
79.7027	60.946	66.3784	854.243
79.7027	60.946	66.3784	854.243
68.4536	98.4865	52.2162	68.7568
68.4536	98.4865	52.2162	68.7568
68.4536	98.4865	52.2162	68.7568
216.351	317.538	86.5676	74.2162
216.351	317.538	86.5676	74.2162
216.351	317.538	86.5676	74.2162
63.6487	534.622	795.135	66.0541
63.6487	534.622	795.135	66.0541
63.6487	534.622	795.135	66.0541
40.3513	129.405	49.4324	69.3513
40.3513	129.405	49.4324	69.3513
40.3513	129.405	49.4324	69.3513
78.5135	66	59.6757	239.676
78.5135	66	59.6757	239.676
78.5135	66	59.6757	239.676
95.2162	59.9189	120.703	1359.95
95.2162	59.9189	120.703	1359.95
95.2162	59.9189	120.703	1359.95
329.973	79.8108	62.2973	316.892
329.973	79.8108	62.2973	316.892
329.973	79.8108	62.2973	316.892
78.6216	60.1622	69.5676	2151.35
78.6216	60.1622	69.5676	2151.35
78.6216	60.1622	69.5676	2151.35
71.1081	73.3243	50.5946	533.54
71.1081	73.3243	50.5946	533.54
71.1081	73.3243	50.5946	533.54
319.595	57.1081	61.027	866.324
319.595	57.1081	61.027	866.324
319.595	57.1081	61.027	866.324
100.784	345.27	566.757
100.784	345.27	566.757
100.784	345.27	566.757
295.811	63.8919	171.297
295.811	63.8919	171.297
295.811	63.8919	171.297
401.423	70.4865	158.405
401.423	70.4865	158.405
401.423	70.4865	158.405
50.946	43.4595	555.919
50.946	43.4595	555.919
50.946	43.4595	555.919
77.1351	73.8919	94.3784
77.1351	73.8919	94.3784
77.1351	73.8919	94.3784
62.4595	78.4865	157.838
62.4595	78.4865	157.838
62.4595	78.4865	157.838
333.027	83.8108	60.8649
333.027	83.8108	60.8649
333.027	83.8108	60.8649
68.2703	86.4595	111.904
68.2703	86.4595	111.904
68.2703	86.4595	111.904
238.618	70	382.495
238.618	70	382.495
238.618	70	382.495
84.2703	451.811	102.351
84.2703	451.811	102.351
84.2703	451.811	102.351
87.1622	233.324	182.703
87.1622	233.324	182.703
87.1622	233.324	182.703
62.1346	163.108	67.4054
62.1346	163.108	67.4054
62.1346	163.108	67.4054
57.4865	385.73	73.2973
57.4865	385.73	73.2973
57.4865	385.73	73.2973
176.865	52.5946	195.692
176.865	52.5946	195.692
176.865	52.5946	195.692
85.3784	243.649	102.676
85.3784	243.649	102.676
85.3784	243.649	102.676
60.5405	110.649	56.7297
60.5405	110.649	56.7297
60.5405	110.649	56.7297
59.054	2459.05	339.673
59.054	2459.05	339.673
59.054	2459.05	339.673
437.459	131.405	86.9615
437.459	131.405	86.9615
437.459	131.405	86.9615
69.9459	100.135	75.4054
69.9459	100.135	75.4054
69.9459	100.135	75.4054
59.4865	79.8108	206.081
59.4865	79.8108	206.081
59.4865	79.8108	206.081
113.73	113.784	52.6216
113.73	113.784	52.6216
113.73	113.784	52.6216
69.2973	187.135	117.757
69.2973	187.135	117.757
69.2973	187.135	117.757
69.0541	124.46	67.0811
69.0541	124.46	67.0811
69.0541	124.46	67.0811
77.4865	98.1892	58.1351
77.4865	98.1892	58.1351
77.4865	98.1892	58.1351
78.9459	52.1892	1038
78.9459	52.1892	1038
78.9459	52.1892	1038
315.081	67.1892	1514.03
315.081	67.1892	1514.03
315.081	67.1892	1514.03
70.625	66.8108	203.038
70.625	66.8108	203.038
70.625	66.8108	203.038
62.973	310.622	66.0811
62.973	310.622	66.0811
62.973	310.622	66.0811
140.487	51.3077	643.216
140.487	51.3077	643.216
140.487	51.3077	643.216
45.2432	58.3784	65.4865
45.2432	58.3784	65.4865
45.2432	58.3784	65.4865
47.4595	689.514	595.811
47.4595	689.514	595.811
47.4595	689.514	595.811
67.4054	55.2703	91.7568
67.4054	55.2703	91.7568
67.4054	55.2703	91.7568
437.054	77.3513	45.5946
437.054	77.3513	45.5946
437.054	77.3513	45.5946
120.595	368.486	70.5946
120.595	368.486	70.5946
120.595	368.486	70.5946
78.2703	57.1081	157.378
78.2703	57.1081	157.378
78.2703	57.1081	157.378
110.757	46.5405	94.0541
110.757	46.5405	94.0541
110.757	46.5405	94.0541
82.2432	470.622	58.4865
82.2432	470.622	58.4865
82.2432	470.622	58.4865
77.7297	78.4865	275.297
77.7297	78.4865	275.297
77.7297	78.4865	275.297
61.7568	207.054	1784.87
61.7568	207.054	1784.87
61.7568	207.054	1784.87
61.2703	79.1625	65.9189
61.2703	79.1625	65.9189
61.2703	79.1625	65.9189
67.1622	65.2162	1052.97
67.1622	65.2162	1052.97
67.1622	65.2162	1052.97
68.4595	52.3513	72.0811
68.4595	52.3513	72.0811
68.4595	52.3513	72.0811
86.4324	165.027	97.7838
86.4324	165.027	97.7838
86.4324	165.027	97.7838
149.595	59.973	56.3513
149.595	59.973	56.3513
149.595	59.973	56.3513
63.1622	77.8378	102.784
63.1622	77.8378	102.784
63.1622	77.8378	102.784
103.676	88.1622	391.595
103.676	88.1622	391.595
103.676	88.1622	391.595
297.351	44.6487	53.1622
297.351	44.6487	53.1622
297.351	44.6487	53.1622
189.297	90.5405	59.1923
189.297	90.5405	59.1923
189.297	90.5405	59.1923
290.324	66.7027	51.1892
290.324	66.7027	51.1892
290.324	66.7027	51.1892
67.027	71.8378	59.0811
67.027	71.8378	59.0811
67.027	71.8378	59.0811
80.9189	60	49.9189
80.9189	60	49.9189
80.9189	60	49.9189
85.3243	55.3513	90.9459
85.3243	55.3513	90.9459
85.3243	55.3513	90.9459
64.3125	94.8919	88.7838
64.3125	94.8919	88.7838
64.3125	94.8919	88.7838
45.4595	215.568	861.919
45.4595	215.568	861.919
45.4595	215.568	861.919
54.0811	59.3784	90.6757
54.0811	59.3784	90.6757
54.0811	59.3784	90.6757
96.2432	45.7838	90.5135
96.2432	45.7838	90.5135
96.2432	45.7838	90.5135
57.6757	86.6216	235.243
57.6757	86.6216	235.243
57.6757	86.6216	235.243
49.8649	62.7297	87.4865
49.8649	62.7297	87.4865
49.8649	62.7297	87.4865
66.9459	185.243	602.243
66.9459	185.243	602.243
66.9459	185.243	602.243
163.324	80.5405	660.692
163.324	80.5405	660.692
163.324	80.5405	660.692
295.622	62.8919	51.0811
295.622	62.8919	51.0811
295.622	62.8919	51.0811
73.6154	85.0541	72.4595
73.6154	85.0541	72.4595
73.6154	85.0541	72.4595
203.973	235.432	62.5946
203.973	235.432	62.5946
203.973	235.432	62.5946
65.9459	62.8378	566.108
65.9459	62.8378	566.108
65.9459	62.8378	566.108
261.216	119.27	103.622
261.216	119.27	103.622
261.216	119.27	103.622
60.4324	62.4324	472.081
60.4324	62.4324	472.081
60.4324	62.4324	472.081
156.946	58.5135	64.2432
156.946	58.5135	64.2432
156.946	58.5135	64.2432
119.108	522.54	191.649
119.108	522.54	191.649
119.108	522.54	191.649
186.027	60.5135	46.0811
186.027	60.5135	46.0811
186.027	60.5135	46.0811
193.27	207.216	68.3513
193.27	207.216	68.3513
193.27	207.216	68.3513
40.4865	45.946	61.4054
40.4865	45.946	61.4054
40.4865	45.946	61.4054
54.5676	268.892	55.2703
54.5676	268.892	55.2703
54.5676	268.892	55.2703
200.541	83.8378	54.2432
200.541	83.8378	54.2432
200.541	83.8378	54.2432
73.5405	55.8919	318.027
73.5405	55.8919	318.027
73.5405	55.8919	318.027
148.946	62.6216	69.3784
148.946	62.6216	69.3784
148.946	62.6216	69.3784
64.4595	54.5676	177.216
64.4595	54.5676	177.216
64.4595	54.5676	177.216
214.703	53.1622	80.0811
214.703	53.1622	80.0811
214.703	53.1622	80.0811
68.8108	60.1351	73.8919
68.8108	60.1351	73.8919
68.8108	60.1351	73.8919
70.0577	100.216	301.486
70.0577	100.216	301.486
70.0577	100.216	301.486
102.838	89.1081	321.568
102.838	89.1081	321.568
102.838	89.1081	321.568
204.892	518.784	81.3513
204.892	518.784	81.3513
204.892	518.784	81.3513
64.973	62.1622	59.5135
64.973	62.1622	59.5135
64.973	62.1622	59.5135
66.1081	48.4054	151.838
66.1081	48.4054	151.838
66.1081	48.4054	151.838
154	129.108	98.8108
154	129.108	98.8108
154	129.108	98.8108
85.2432	63.5676	81.2703
85.2432	63.5676	81.2703
85.2432	63.5676	81.2703
89.5676	52.3243	69.8378
89.5676	52.3243	69.8378
89.5676	52.3243	69.8378
214.713	62.2703	61.1622
214.713	62.2703	61.1622
214.713	62.2703	61.1622
59.8649	64.6487	420.081
59.8649	64.6487	420.081
59.8649	64.6487	420.081
58.1081	378.676	255.108
58.1081	378.676	255.108
58.1081	378.676	255.108
252.784	239.784	100.487
252.784	239.784	100.487
252.784	239.784	100.487
63	87.4324	48.5676
63	87.4324	48.5676
63	87.4324	48.5676
89.5676	235.649	64.2973
89.5676	235.649	64.2973
89.5676	235.649	64.2973
259.081	632.054	67.8919
259.081	632.054	67.8919
259.081	632.054	67.8919
84.6487	92.4595	825.649
84.6487	92.4595	825.649
84.6487	92.4595	825.649
54.5405	232.568	241.676
54.5405	232.568	241.676
54.5405	232.568	241.676
79.3784	54.2432	69.7838
79.3784	54.2432	69.7838
79.3784	54.2432	69.7838
127.838	102.054	53.1081
127.838	102.054	53.1081
127.838	102.054	53.1081
82.6757	82.3513	80.4595
82.6757	82.3513	80.4595
82.6757	82.3513	80.4595
144.919	80.2125	73.2703
144.919	80.2125	73.2703
144.919	80.2125	73.2703
78.7297	1323.89	650.486
78.7297	1323.89	650.486
78.7297	1323.89	650.486
70.2432	47.7838	59.973
70.2432	47.7838	59.973
70.2432	47.7838	59.973
451.73	86	90.7838
451.73	86	90.7838
451.73	86	90.7838
71.5135	92.6216	61.2162
71.5135	92.6216	61.2162
71.5135	92.6216	61.2162
290.324	157.027	89.973
290.324	157.027	89.973
290.324	157.027	89.973
195.183	189.297	1056.11
195.183	189.297	1056.11
195.183	189.297	1056.11
94	73.6757	54.2973
94	73.6757	54.2973
94	73.6757	54.2973
129.513	174.351	94.8108
129.513	174.351	94.8108
129.513	174.351	94.8108
134.108	70.1081	76.7027
134.108	70.1081	76.7027
134.108	70.1081	76.7027
193.027	125.108	116.54
193.027	125.108	116.54
193.027	125.108	116.54
261.811	47.4324	50.2162
261.811	47.4324	50.2162
261.811	47.4324	50.2162
82.5946	74.7568	99.4324
82.5946	74.7568	99.4324
82.5946	74.7568	99.4324
72.027	64.9189	680.54
72.027	64.9189	680.54
72.027	64.9189	680.54
45.4054	257.649	598.378
45.4054	257.649	598.378
45.4054	257.649	598.378
70.5135	38.973	50.8108
70.5135	38.973	50.8108
70.5135	38.973	50.8108
61.8108	77.9459	780.595
61.8108	77.9459	780.595
61.8108	77.9459	780.595
92.9459	243.297	923.946
92.9459	243.297	923.946
92.9459	243.297	923.946
73	42.7027	88.421
73	42.7027	88.421
73	42.7027	88.421
61.4324	77.1892	71.1081
61.4324	77.1892	71.1081
61.4324	77.1892	71.1081
105.811	71.2432	64.3243
105.811	71.2432	64.3243
105.811	71.2432	64.3243
59.3784	79.8649	167.676
59.3784	79.8649	167.676
59.3784	79.8649	167.676
209.676	147.973	1264.57
209.676	147.973	1264.57
209.676	147.973	1264.57
73.0541	71.7027	83.7838
73.0541	71.7027	83.7838
73.0541	71.7027	83.7838
223.892	602.081	326.73
223.892	602.081	326.73
223.892	602.081	326.73
67.45	664.892	107.351
67.45	664.892	107.351
67.45	664.892	107.351
64.0541	93.2432	339.135
64.0541	93.2432	339.135
64.0541	93.2432	339.135
483.595	128.243
483.595	128.243
483.595	128.243
220.892	382.946
220.892	382.946
220.892	382.946
106.73	70.3513
106.73	70.3513
106.73	70.3513
62.8269	565.297
62.8269	565.297
62.8269	565.297
78.6216	83.4324
78.6216	83.4324
78.6216	83.4324
186.946	364.541
186.946	364.541
186.946	364.541
72.5135	58.7027
72.5135	58.7027
72.5135	58.7027
53.2125	60.5676
53.2125	60.5676
53.2125	60.5676
73.8108	57.5676
73.8108	57.5676
73.8108	57.5676
86.1081	71.9459
86.1081	71.9459
86.1081	71.9459
818.27	61.4865
818.27	61.4865
818.27	61.4865
195.811	69.7838
195.811	69.7838
195.811	69.7838
363.108	217.351
363.108	217.351
363.108	217.351
48.7838	102.568
48.7838	102.568
48.7838	102.568
513.649	156.649
59.054	156.649
513.649	156.649
59.054	66.973
513.649	66.973
59.054	66.973
96.1892	260.216
96.1892	260.216
96.1892	260.216
75.1892	54.6757
75.1892	54.6757
75.1892	54.6757
77.2162	97.7027
77.2162	97.7027
77.2162	97.7027
223.595	68.5946
223.595	68.5946
223.595	68.5946
145.513	69.2703
145.513	69.2703
145.513	69.2703
156.919	346.081
156.919	346.081
156.919	346.081
542.054	80.2432
542.054	80.2432
542.054	80.2432
83.8108	632.568
83.8108	632.568
83.8108	632.568
195.811	65.4865
195.811	65.4865
195.811	65.4865
100.513	123.135
100.513	123.135
100.513	123.135
320.595	52.6487
320.595	52.6487
320.595	52.6487
71.9459	48.2703
71.9459	48.2703
71.9459	48.2703
244.27	82.7027
244.27	82.7027
244.27	82.7027
104.622	63.027
104.622	63.027
104.622	63.027
209.135	343.703
209.135	343.703
209.135	343.703
82.2432	112.378
82.2432	112.378
82.2432	112.378
192.189	439.784
192.189	439.784
192.189	439.784
159.595	73.8649
159.595	73.8649
159.595	73.8649
76.3243	226.946
76.3243	226.946
76.3243	226.946
66.1351	74.5676
66.1351	74.5676
66.1351	74.5676
84	568.081
84	568.081
84	568.081
195.513	53.9189
195.513	53.9189
195.513	53.9189
76.4324	58.5946
76.4324	58.5946
76.4324	58.5946
84.3243	246.73
84.3243	246.73
84.3243	246.73
198.324	73.4054
198.324	73.4054
198.324	73.4054
186.676	71.6757
186.676	71.6757
186.676	71.6757
96.9189	55.5946
96.9189	55.5946
96.9189	55.5946
56.8649	70.5135
56.8649	70.5135
56.8649	70.5135
120.622	58.3513
247.757	58.3513
120.622	58.3513
247.757	43.7568
120.622	43.7568
247.757	43.7568
77.0811	416.676
77.0811	416.676
77.0811	416.676
150.865	48.1351
150.865	48.1351
150.865	48.1351
73.0541	417.135
73.0541	417.135
73.0541	417.135
54.1892	136.27
54.1892	136.27
54.1892	136.27
54.946	305.757
54.946	305.757
54.946	305.757
71.7297	58.7027
71.7297	58.7027
71.7297	58.7027
144.703	241.243
144.703	241.243
144.703	241.243
75.5946	66.1081
75.5946	66.1081
75.5946	66.1081
136.946	61.4865
136.946	61.4865
136.946	61.4865
174.973	62.7297
174.973	62.7297
174.973	62.7297
133.919	1143.92
133.919	1143.92
133.919	1143.92
270.73	60.1892
270.73	60.1892
270.73	60.1892
57.2308	56.4054
57.2308	56.4054
57.2308	56.4054
120.108	64.8649
120.108	64.8649
120.108	64.8649
159.757	50.946
159.757	50.946
159.757	50.946
86.7838	61.2973
86.7838	61.2973
86.7838	61.2973
67.9459	77.4054
67.9459	77.4054
67.9459	77.4054
184.054	197.378
184.054	197.378
184.054	197.378
76.1081	54.4595
76.1081	54.4595
76.1081	54.4595
168.595	55.3513
168.595	55.3513
168.595	55.3513
43.9808	84.5946
43.9808	84.5946
43.9808	84.5946
57.2973	52.5676
57.2973	52.5676
57.2973	52.5676
73.973	60.4324
73.973	60.4324
73.973	60.4324
318.73	102.054
318.73	102.054
318.73	102.054
69.5946	70.8919
69.5946	70.8919
69.5946	70.8919
103.162	359.541
103.162	359.541
103.162	359.541
39.5135	46.5125
39.5135	46.5125
39.5135	46.5125
76.8919	241.351
76.8919	241.351
76.8919	241.351
78.6216	63.8378
78.6216	63.8378
78.6216	63.8378
60.4324	134.946
60.4324	134.946
60.4324	134.946
74.0541	58.5676
74.0541	58.5676
74.0541	58.5676
62	79.2973
62	79.2973
62	79.2973
64.8108	63.6757
64.8108	63.6757
64.8108	63.6757
66.0811	175.108
66.0811	175.108
66.0811	175.108
77.2162	49.3784
77.2162	49.3784
77.2162	49.3784
65.6757	77.0541
65.6757	77.0541
65.6757	77.0541
60.6154	145.459
60.6154	145.459
60.6154	145.459
381.459	82.4324
381.459	82.4324
381.459	82.4324
99.2703	171.731
99.2703	171.731
99.2703	171.731
413.676	64.7027
413.676	64.7027
413.676	64.7027
67.8919	43.2973
67.8919	43.2973
67.8919	43.2973
110.216	1211.49
110.216	1211.49
110.216	1211.49
90.0541	1754.59
90.0541	1754.59
90.0541	1754.59
169.27	154.919
169.27	154.919
169.27	154.919
54.4324	289.595
54.4324	289.595
54.4324	289.595
234.487	122.432
234.487	122.432
234.487	122.432
268.297	722.096
268.297	722.096
268.297	722.096
73.0541	102.297
73.0541	102.297
73.0541	102.297
222	61.2703
222	61.2703
222	61.2703
60	447.363
60	447.363
60	447.363
135.432	78.1622
135.432	78.1622
135.432	78.1622
206.27	154.946
206.27	154.946
206.27	154.946
70.9189	66.2973
70.9189	66.2973
70.9189	66.2973
293.189	51.8378
293.189	51.8378
293.189	51.8378
257.703	157.865
257.703	157.865
257.703	157.865
293.541	63.8649
293.541	63.8649
293.541	63.8649
121.919	58.1622
121.919	58.1622
121.919	58.1622
284.514	58.5946
284.514	58.5946
284.514	58.5946
85	53.1351
85	53.1351
85	53.1351
64.525	58.1892
64.525	58.1892
64.525	58.1892
182.513	164.108
182.513	164.108
182.513	164.108
61.8919	125.46
61.8919	125.46
61.8919	125.46
217.513	621.946
217.513	621.946
217.513	621.946
60.3784	432.919
60.3784	432.919
60.3784	432.919
124.946	59.3513
124.946	59.3513
124.946	59.3513
68.9459	68.8108
68.9459	68.8108
68.9459	68.8108
228.135	141.135
228.135	141.135
228.135	141.135
140.784	71.3513
140.784	71.3513
140.784	71.3513
76.2162	113.676
76.2162	113.676
76.2162	113.676
83.7568	77.3513
83.7568	77.3513
83.7568	77.3513
109.75	59.2703
109.75	59.2703
109.75	59.2703
220.487	64.9459
220.487	64.9459
220.487	64.9459
75.5676	78.8108
75.5676	78.8108
75.5676	78.8108
169.027	373.811
169.027	373.811
169.027	373.811
46.4865	56.0811
46.4865	56.0811
46.4865	56.0811
76.7568	189.27
76.7568	189.27
76.7568	189.27
69	67.027
69	67.027
69	67.027
58.2162	163.946
58.2162	163.946
58.2162	163.946
100.189	56.3243
100.189	56.3243
100.189	56.3243
62.5405	377.297
62.5405	377.297
62.5405	377.297
161.892	124.081
161.892	124.081
161.892	124.081
71.3243	642.189
71.3243	642.189
71.3243	642.189
95.8378	81.1081
95.8378	81.1081
95.8378	81.1081
58	68.9459
58	68.9459
58	68.9459
166.459	98.3243
166.459	98.3243
166.459	98.3243
163.865	303.108
163.865	303.108
163.865	303.108
79.9459	119.135
79.9459	119.135
79.9459	119.135
175.297	57.8649
175.297	57.8649
175.297	57.8649
746	48.1622
746	48.1622
746	48.1622
183.216	310.378
183.216	310.378
183.216	310.378
52.2973	100.649
52.2973	100.649
52.2973	100.649
71.3784	163.324
71.3784	163.324
71.3784	163.324
98.1892	72.6154
98.1892	72.6154
98.1892	72.6154
74.5946	215.865
74.5946	215.865
74.5946	215.865
407.514	62.5946
407.514	62.5946
407.514	62.5946
73.3243	64.027
73.3243	64.027
73.3243	64.027
69.5946	293.297
69.5946	293.297
69.5946	293.297
108.135	71.027
108.135	71.027
108.135	71.027
62.5135	89.7297
62.5135	89.7297
62.5135	89.7297
85.5946	67.3784
85.5946	67.3784
85.5946	67.3784
74.7838	115.865
74.7838	115.865
74.7838	115.865
92.5405	56.1351
92.5405	56.1351
92.5405	56.1351
224.757	52.3513
224.757	52.3513
224.757	52.3513
188.216	135.054
188.216	135.054
188.216	135.054
154.243	106.892
154.243	106.892
154.243	106.892
61.2162	139.351
61.2162	139.351
61.2162	139.351
404.919	74.1622
404.919	74.1622
404.919	74.1622
362.405	72.8649
362.405	72.8649
362.405	72.8649
91.5135	563.135
91.5135	563.135
91.5135	563.135
48.9189	77
48.9189	77
48.9189	77
182.838	44.1892
182.838	44.1892
182.838	44.1892
150.757	90.1622
150.757	90.1622
150.757	90.1622
51.6216	58.8378
51.6216	58.8378
51.6216	58.8378
133.054	93.1351
133.054	93.1351
133.054	93.1351
84.2432	246.541
84.2432	246.541
84.2432	246.541
190.595	67.0541
190.595	67.0541
190.595	67.0541
85.3513	43.1622
85.3513	43.1622
85.3513	43.1622
75.6757	73.1892
75.6757	73.1892
75.6757	73.1892
108.703	223.216
108.703	223.216
108.703	223.216
46.6487	50.5135
46.6487	50.5135
46.6487	50.5135
98.8378	63.3513
98.8378	63.3513
98.8378	63.3513
224	58.1622
224	58.1622
224	58.1622
114.108	193.568
114.108	193.568
114.108	193.568
117.162	52.8378
117.162	52.8378
117.162	52.8378
58.3243	66.1622
58.3243	66.1622
58.3243	66.1622
83.027	61.3243
83.027	61.3243
83.027	61.3243
101.892	191.189
101.892	191.189
101.892	191.189
78.4595	45.8378
78.4595	45.8378
78.4595	45.8378
42.1892	371.189
42.1892	371.189
42.1892	371.189
155.054	63.6487
155.054	63.6487
155.054	63.6487
67.973	58.6487
67.973	58.6487
67.973	58.6487
80.7568	384.73
80.7568	384.73
80.7568	384.73
123.973	60.7027
123.973	60.7027
123.973	60.7027
59.0811	244.405
59.0811	244.405
59.0811	244.405
109.54	317.838
109.54	317.838
109.54	317.838
96.9459	1220.38
96.9459	1220.38
96.9459	1220.38
143.432	147.513
143.432	147.513
143.432	147.513
133.919	213.946
133.919	213.946
133.919	213.946
79.2162	62.5135
79.2162	62.5135
79.2162	62.5135
56.5676	70.3513
56.5676	70.3513
56.5676	70.3513
60.0811	59.946
60.0811	59.946
60.0811	59.946
67.2432	61.9189
67.2432	61.9189
67.2432	61.9189
57.1892	73.8649
57.1892	73.8649
57.1892	73.8649
60.027	122.351
60.027	122.351
60.027	122.351
139.216	107.324
139.216	107.324
139.216	107.324
57.8649	56.7568
57.8649	56.7568
57.8649	56.7568
61.7568	116.054
61.7568	116.054
61.7568	116.054
79.4595	59.8919
79.4595	59.8919
79.4595	59.8919
55.4054	93.5135
55.4054	93.5135
55.4054	93.5135
66.7838	48.1892
66.7838	48.1892
66.7838	48.1892
42.7838	160.595
42.7838	160.595
42.7838	160.595
57.946	72.8649
57.946	72.8649
57.946	72.8649
193.838	40.3513
193.838	40.3513
193.838	40.3513
74.2432	73.5135
74.2432	73.5135
74.2432	73.5135
104.365	60.2432
104.365	60.2432
104.365	60.2432
81.8108	69.8649
81.8108	69.8649
81.8108	69.8649
67.1892	75.2162
67.1892	75.2162
67.1892	75.2162
67.4595	674.54
67.4595	674.54
67.4595	674.54
195.838	43.0811
195.838	43.0811
195.838	43.0811
44.2162	771.784
44.2162	771.784
44.2162	771.784
96.4054	168.054
96.4054	168.054
96.4054	168.054
94.0811	76.5676
94.0811	76.5676
94.0811	76.5676
71.9189	76.0541
71.9189	76.0541
71.9189	76.0541
63.2973	149.297
63.2973	149.297
63.2973	149.297
73.0541	147.459
73.0541	147.459
73.0541	147.459
109.811	68.8108
109.811	68.8108
109.811	68.8108
336.811	66.6757
336.811	66.6757
336.811	66.6757
559.162	83.3243
559.162	83.3243
559.162	83.3243
500.297	57.3784
500.297	57.3784
500.297	57.3784
64.4039	162.189
64.4039	162.189
64.4039	162.189
154.487	59.973
154.487	59.973
154.487	59.973
80.0811	77.8919
80.0811	77.8919
80.0811	77.8919
57.7297	73.1622
57.7297	73.1622
57.7297	73.1622
85.5135	127.703
85.5135	127.703
85.5135	127.703
111.243	60.1892
111.243	60.1892
111.243	60.1892
50.5405	82.8108
50.5405	82.8108
50.5405	82.8108
789.703	76.1622
789.703	76.1622
789.703	76.1622
258.703	60.8649
258.703	60.8649
258.703	60.8649
82	598.216
82	598.216
82	598.216
58.4054	70.5946
58.4054	70.5946
58.4054	70.5946
110.811	56.7027
110.811	56.7027
110.811	56.7027
120.027	56.1622
120.027	56.1622
120.027	56.1622
57.6346	72.2162
57.6346	72.2162
57.6346	72.2162
206.784	65.3513
206.784	65.3513
206.784	65.3513
149.243	132.676
149.243	132.676
149.243	132.676
176.162	1978.89
176.162	1978.89
176.162	1978.89
122.622	1607.35
122.622	1607.35
122.622	1607.35
243.027	370.054
243.027	370.054
243.027	370.054
71.973	88.2973
71.973	88.2973
71.973	88.2973
187.811	824.351
187.811	824.351
187.811	824.351
97.4054	234.513
97.4054	234.513
97.4054	234.513
200.919	52.2973
200.919	52.2973
200.919	52.2973
78.4865	77.2162
[truncated: 4,700 more rows]
