# Supplementary material for: Structural organization and dynamics of FCHo2 docking on membranes
Source: eLife. 2022 Jan 19;11:e73156. doi: 10.7554/eLife.73156 (PMC8798043; doi:10.7554/eLife.73156)
Supplement: Figure 1—figure supplement 5—source data 1. [file elife-73156-fig1-figsupp5-data1.xlsx]

## Sheet: Feuil1
homogeneous	domain
2.6	4.55
4.03	4.55
3.51	4.55
4.55	4.55
4.55	4.55
4.55	4.55
4.55	4.55
1.3	4.55
4.55	4.55
4.55	4.55
2.6	4.55
2.6	4.55
4.55	4.55
1.69	4.55
3.38	4.55
4.55	4.55
4.55	4.55
4.55	4.55
4.55	4.55
4.55	4.55
4.55	1.3
4.55	4.55
4.55	4.55
4.55	0.78
4.55	4.55
4.55	4.55
4.55	4.55
1.82	4.55
4.03	3.51
4.03	4.55
4.55	4.55
2.34	4.55
0.91	4.55
4.29	4.55
4.55	4.55
1.17	4.55
4.55	4.55
4.55	4.55
4.29	3.12
2.73	4.55
3.77	2.73
4.55	4.55
4.55	2.99
4.55
4.55
2.99
1.69
3.12
1.69
0.91
