# Supplementary material for: Structural organization and dynamics of FCHo2 docking on membranes
Source: eLife. 2022 Jan 19;11:e73156. doi: 10.7554/eLife.73156 (PMC8798043; doi:10.7554/eLife.73156)
Supplement: Figure 1—source data 1. [file elife-73156-fig1-data1.xlsx]

## Sheet: Figure 1D
- FCHo2	FCHo2
912.062	3793.51
657.865	3621.81
635.748	549.075
504.375	4030.95
564.962	4250.97
533.838	5985.6
499.526	2561.46
446.919	3087.95
413.892	2893.65
402.196	3096.86
445.081	3241.89
379.188	3205.91
439.054	468.892
399.75	4297.73
424.811	4053.68
410.514	3273.35
383.3	610.054
377.596	4500.86
416.788	3601.84
429.649	1459.23
393.523	1410.84
489.346	2604.54
400.189	3065.97
415.595	3477.76
438.486	1799.46
334.568	1469.95
342.649	1794.46
620.862	2077.16
571.277	1042.13
461.062	2703.65
487.3	1271.13
432.9	836
480.837	3532.27
452.724	3656.35
393.288	4092.49
384.711	1084.95
407.459	671
361.892	3889.35
335.288	2724.38
391.514	1703.38
374	3466.73
319.019	3240.22
376.85	2138.38
393.054	2110.16
379.378	657.919
321.595	940.54
373.865	1198.32
321.378	1215.08
689.925	1288.62
570.673	695.703
498.27	2971.12
555.794	1373.71
474.973	2292.49
472.892	4304.89
370.595	2091.08
389.459	3179.43
337.676	2129.86
343.459	888.108
550.14	3298.03
501.108	3824.89
367.973	2612.11
356.892	970.757
353.135	4569.46
2779.95	478.653
1796.24	4006.3
1934.08	1332.24
1728.19	2514.92
1327.24	3781.92
1511.68	1194
1726	3758.54
1473.65	6440.68
1710.05	3073.86
1672.84	6040.74
1554.49	1679.38
1443.11	733.784
1093.73	2379.08
1286.65	446.038
1298.43	3933.22
1130.87	521.649
965.361	3449.65
1063.4	778.432
1246.32	1168.32
914.46	4209.46
1159.4	1834.73
831.54	1540.43
1225.51	842.975
1046.73	1495.76
939.838	2138.92
999.649	1302.62
1087.22	4776.68
1110.19	2476.03
972.216	660.288
815.162	3814.51
744.27	3450.68
662.919	2335.89
1107.57	3127.68
790.676	2358.11
734.622	1370.08
799.216	2115.97
826.622	4597.15
733.784	592.189
857.081	4079.76
869.027	5489.46
700.162	3482.32
857.027	2630.73
895.811	2655.03
682.892	2711.54
598.865	2861.49
902.757	3150.57
602.162	5150.05
625.432	3551.3
793.297	3345.89
783.108	1424.13
639.838	4263.51
673.486	3443.97
875.973	3679.32
855	3472.46
777.378	3784.81
591.486	3284.62
812.108	1611.27
676.703	881.135
798.297	520.438
724.027	399.541
559.216	3292.16
832.811	2227.11
663.189	3886.14
641.703	2947.59
701.838	2569.57
655.897	2769.89
980.676	3390.11
532.324	3079.35
807.595	1786.08
746.568	493.459
721.892	1190.81
735.568	1209
994.838	3613.22
694.135	4001.22
800.081	1298.89
649.405	364.892
811	3240.22
638.811	2383.49
655.703	3129.89
711.892	3398.86
686.324	731.622
614.486	2304.32
656.216	3274.92
705.054	3833.76
723.189	2939.16
601.973	7555.49
784.081	2820.97
866.162	2559.57
793.216	1209.81
685.784	4615.92
810.216	674.027
618.595	3061.62
743.405	1110.38
750.568	552.432
538.811	993.919
495.595	4739.65
669.865	1436.35
637.216	2156.65
561.973	2770.76
789.108	4302.05
656.981	3365.08
657.703	4911.22
676.676	1871.05
527.351	1307.11
586.649	1988.73
719.622	3499.81
553.378	3438.49
536.405	2179.59
760.054	991.95
530.378	4054.86
507.946	3267.89
793.135	570.865
651.486	748.703
633.676	3382.84
589.162	3832.86
673.811	2279.43
746.378	3472.05
613.054	2797.3
617	1058.35
826.027	3059.97
634.703	3082.73
817.765	2261.51
691.46	3920.78
539.162	6768.38
644.514	598.946
636.486	1031.95
684.351	2197.11
542.595	1524.43
572.892	1916.97
552.649	2436.7
535.676	1796.51
677.757	621.135
532.865	1705.84
572.757	5681.27
543.054	3806.3
586.189	3748.51
440.757	3352.51
614.919	4227.49
586.324	3303.19
600.46	1380.43
580.351	4488.62
610.973	3083.97
543.762	4303.4
479.27	3026.46
628.108	3717.14
816.622	4283.24
625.162	3068.81
598.54	950.027
632.649	1068.11
746.75	2061.92
580.676	3445.54
661.649	3992.84
558.405	665.514
578.919	472.27
539.081	633.514
669.054	1665.65
560.189	1404.62
573.568	3069.03
605.54	3854.11
597.838	2550.29
582.027	2040.68
601.189	4027.68
556.135	1622.38
442.405	6866.76
662.595	601.73
459.811	1089.81
589.27	2961
559.946	9737.92
808.27	2752.86
559.703	720.243
641.808	3117.81
582.973	6365.78
480.676	794.404
539.568	1929.79
633.135	2202.97
516.378	3275.59
491.865	3226.59
613.54	1823.65
571.973	2360.46
511.378	2224.24
628.865	2966.19
436.378	808.432
550.135	1295.35
455.676	3566.14
507.676	2091.65
515.243	531.081
541.757	3183.08
723.027	3567.62
555.351	654.297
602.568	1018.43
614.297	2180.59
471.946	533.243
439.324	2224.68
600.108	2673.46
526.027	3266.38
535.108	2624.46
532.54	862.216
428.027	1527.05
614.765	4818
422.946	2047.76
529.622	4529.76
514.189	2171.92
465.622	1363.4
429.432	3013.32
470.649	2478.32
557.784	2630.22
498.486	2394.68
471.054	3340.95
493.622	3998.3
504.514	4159.3
615.595	3533.05
495.351	1847.78
528.46	2335.3
382.73	4703.6
400.027	2924.35
518.622	419.243
440.568	5281.11
567.486	2648.59
523.081	3503.84
463.027	1777.81
489.054	4338
636.595	2984.32
583.378	603.135
454.054	3375.22
591.324	3323.35
414.811	1192.11
585.048	3287.08
499.676	2733.43
444.189	3809.24
416.027	3562.3
439.459	2307.41
518.865	4730.71
565.973	3505.19
542.108	496.892
556.324	1973.19
615.811	836.269
448.297	2780.22
615.622	2881.81
543.324	2302.14
729.351	1583.05
572.865	896.946
985.595	2381.84
1094.3	3823.27
847.486	2514.92
879.486	1190.05
1102.89	1954.68
874.622	1117.54
897.27	2594.65
715.622	4030.27
847.838	1260.79
796.514	3337.14
703.351	2577.97
758.243	477.541
892.838	3523.59
763.108	540.703
768.243	3920.73
727.189	5717.68
773.757	713.519
570.432	3381.57
751.622	835.27
758.912	2292.57
505	404.154
538.351	858.405
766.824	2182.97
860.135	2360.27
561.865	3994.19
545.27	613.162
720.108	1627.43
522.622	527.811
518.135	4072.08
562.405	3018.78
516.108	3954.54
570.054	2070.11
734.189	4423.68
540.838	4798.14
611.189	913.946
628.297	1831.3
672.486	3679.73
544.054	3314.78
504.432	1554.16
530.892	2528.78
524.243	2022.57
540.054	2161.41
473.135	4205.68
521.973	3734.89
616.973	1834.03
588.135	2298.76
595.027	2087.73
593.189	2498.24
608.892	2162.62
519.865	3860.78
558.46	3555.86
611.568	2653.59
567.865	3842.11
810.189	681.378
412.514	3505
501.351	3253.22
680.919	2566.7
450.324	1853.27
478.973	993.635
571.108	3137.97
413.514	1160.29
391.081	589.757
581.378	1338.87
561.216	2718.49
497.838	2917.97
429.973	3096.03
576.865	3394
486.081	2800.81
549.568	1853.32
540.135	3050.43
591.216	1843.27
593.649	457.108
487.676	3418.14
469.243	1386.3
473.784	2998.03
439.973	5765.41
533.649	1474.03
475.892	780.405
415.216	3367.24
655	569.622
457.946	2259
356.757	4205.4
647.676	4126.22
551.622	3707.81
587.595	2314.84
455.811	3261.62
500.838	2308.54
429.189	4212.49
482.757	1050.57
423.081	3705.43
526.622	2734.14
441.108	572.46
386.405	3056.54
558.135	1503.32
407.973	2037.3
1493.24	2937.57
1857.54	4169.62
1345.87	3011.22
1623.81	4549.86
1338.73	354.459
1325.89	4056.84
1033.68	2335.03
925.027	4026.48
973.216	3231.03
1132.03	2483.81
1365.65	2936.7
817.405	3008
1191.57	2487.35
1004.35	2249.76
1074.65	4547.27
772.486	3647.16
655.297	3373.7
727.243	611.973
946.162	2489.35
704.907	3935.97
858.351	2903.38
653.892	8372.76
655.973	567.351
693.27	1255.4
545.135	3358
669.135	3382.89
622.54	1290.9
602.081	835.149
655.73	1086.95
634.622	385.904
1075.54	4125.51
711.189	9073.59
631.919	4487.16
562.973	2897.57
548.324	2972.68
564.595	1950.62
651.784	1218.79
571.108	3500.7
619.27	3070.65
613.73	4523.95
670.622	1860.89
589.973	4190.84
568.324	3877.46
572.676	10016
543.73	3035.27
526.135	2274.43
668.811	3996.7
650.297	3880.27
593.54	3431.38
532.757	2783.16
609.838	1587.87
510.919	1379.97
553.838	4060.92
550.189	2974.97
566.595	3997.46
458.73	3367.35
447.486	1679.4
520.081	2992.92
557.054	3533.89
482.865	1638.43
445.919	2473.27
471.108	7640.54
472.027	562.162
492.405	1422.95
550.703	476.189
462.459	3151.97
790.838	361.316
721.568	4228.84
596.757	7091.27
586.838	2452.05
540.568	9203.27
544.703	3270.05
519.378	930.672
477.865	2521.24
809.412	1947.7
877.378	1961.3
2729.22	3441.54
2172.92	2373.22
2528.86	4089.7
2103.35	1648.22
2037.81	2016.13
2034.03	2638.14
1984.84	635.108
1769.4	4038.57
2130.59	4243.57
1876.51	2667.86
1831.65	3948.62
1674.54	3363.96
1434.57	3490
1423.65	4469.97
1301.03	2851.41
1462.24	5888.08
1226.24	9241.22
1189.68	3410.24
1038	578.757
1106.84	3505
1365.24	2836.7
871.486	4534.03
1127	3196.54
1048.43	3352.57
981.162	2387.32
825.892	2668.16
767.973	1550.62
920.703	579.175
1027.27	315.474
910.46	345.432
879.865	3794.65
942.324	741.405
822.108	2002.87
750.054	2873.89
892.108	2143.78
937.351	3003.76
929.135	1671.05
984.081	2420.68
834.297	1868.78
896.297	2764.78
1032.62	740.46
833.73	3798.92
734.054	503.486
964.378	2009.13
958.865	3255.05
1044.32	3191.89
986.216	1974.54
893.081	818.73
585.27	762.324
1151.89	4867.16
854.865	3014.51
1026.84	2331.89
1032.22	3793.24
854.135	3573.54
860.676	565.54
775.216	3402.49
864.054	3549.81
788.676	5148.86
834.162	1294.16
786.297	1541.89
841.486	2153.57
717.297	2377.38
865.73	2272.49
759.568	2708.65
841.162	3939.35
694.622	3276.05
738.649	2805
868.838	4150.92
872.676	1716.54
725.378	3545.05
813.838	602.378
835.946	1756.08
840.703	2242.54
766.838	4831.75
874.676	1576.02
881.432	1762.87
717.865	2886.58
669.324	4942.68
808.622	2239.97
543.568	4201.4
845.54	1189.16
862.838	2894.84
746	5000.46
820.54	2583.3
716.622	3571.08
810.649	3458.03
714.973	633.973
493.703	1183.16
729.081	2995.08
662.919	3445.65
687.432	2105.97
759.622	1845.89
765.432	4372
797.189	2876.84
825.087	3243.08
901.54	2882.24
636.784	2728.35
822.162	542.676
925.595	1401.89
807.412	541.189
754.297	1679.6
554.865	709.297
718.189	2237.84
771.108	4031.89
715.46	2831.84
719.649	1984.57
827.865	2979.57
753.162	2817.22
641.919	2724.41
911	3121.05
578.46	2022.65
563.882	1814.95
560.054	776.568
507.432	2920.11
795.297	3693.51
550.189	4218.81
609.46	3588.49
728.54	3541.32
1130.47	4225.73
1040.22	1637.24
835.838	17771.8
1000.16	619.216
946.378	1750.38
924.919	3318.46
703.162	4270.54
1089.16	4195.4
865.649	3347.57
826.811	477.865
882.811	3598.95
815.378	4819.97
893.108	1935.46
793.297	714.27
449.568	3093.19
800.162	1513.13
693.081	1707.11
713.243	1814.46
700.973	653.654
829	3257.08
558.216	4169.95
766.297	3972.89
699.486	3032.23
713.077	246.577
555.588	4096.76
3250.59	4311.03
2526.84	1506.6
2530.48	5825.38
1766.46	3699.92
1788	1256.8
1536.97	666.784
1248.12	2149.16
1131.74	3289
940.442	570.4
1053.53	2571.54
776.054	1904.87
863.865	9358.22
740.865	3796.62
805.865	4397.62
864.189	2975.97
900.838	3400.51
696.811	4967.57
944.596	354.038
874	2393
1038.95	2622.32
714.973	4256.86
628.622	4118.81
866.46	3141.11
780.027	1210.73
739.432	4407.86
699.703	1691.27
672.054	2521.68
577	1588.81
721.432	2161.59
707.757	2393.86
798.243	1998.19
563.405	762
707.162	1850.54
574.243	3817.78
762.784	2926.3
692.324	3623.97
625.892	3775.41
667.703	1979.33
667.595	538.351
818.378	2739.86
623.081	4519.85
675.108	3023.65
555.703	2229.24
549.919	380.73
694.432	508.27
607.811	2255.89
607.514	3853.35
633.324	1316.16
697.027	4070.95
597.324	4906.08
556.784	1014.05
606.649	3022.19
662.405	2047.6
680.081	3800.11
564.243	3079.68
534.865	1612.35
625.742	5598.24
605	1702.6
628.378	1179.03
561	2289.7
528.784	2394.19
639.67	1869.6
682.703	2980.92
584.135	3530.27
494.189	3848.3
602.486	2615.59
527.54	3702.38
651.568	3600.68
707.216	3342.62
701.784	4105.4
523.622	3334.78
535.432	3020.92
592.649	576.297
635.486	2719.65
757.054	1396.05
562.189	1354
613.676	3602.65
790.189	2170.68
531.108	464.459
548.865	3205.86
544.162	2749.89
722.788	1405.89
535.784	3528.14
640.919	1507.92
604.811	2338.49
497.038	2386.49
500.514	2245.05
635.27	2956.76
633.405	3523.68
547.243	2921.24
537.595	1226
472.514	416.459
576.865	1839.54
660.162	5226.27
675.189	3072.95
604.784	2613.08
553.054	1315.7
651.162	620.73
547.297	3529.54
606.514	666.811
555.46	6664.15
583.865	597.46
472.811	2087.22
559.919	2459.08
545.189	4049.3
535.919	758.838
444.459	3985.54
525.324	4576.76
461.108	3440.49
532.923	3310.11
610.378	2799.73
623.596	2663.54
546.25	2704.41
579.486	413.865
594.46	2847.16
476.162	877.568
672.811	7727.43
465.541	3806.14
507.737	857.885
484.676	2162.19
508.486	3438.08
566.019	1025.22
575.865	3887.3
447.162	2402.81
571.676	3476.08
517.243	543.515
542.919	3184.65
556	3672.97
510.162	2754.19
549.378	3082.54
511.108	529.027
555.838	3021.57
501.432	2965.05
513.378	540.189
449.486	3308.46
517.676	4222.76
437.838	1870
635.784	2381.43
508.108	3039.16
542.324	636.973
630.405	1662.54
411.27	8099.32
538.973	5231.84
481.919	499.838
538.622	1174.03
560.514	1178.54
478.108	308.887
444.324	1520.3
517.324	478.541
537.353	3158.78
470.946	4319.57
560.865	3569.22
584.595	2959.62
443.622	2304.78
527.892	2689.81
497.297	788.162
504.892	2824.68
570.811	3619.57
465.297	3271.3
405.838	4473.81
425.432	2603.03
426.324	3568.59
464.135	1676.49
411.649	2886.57
522.405	3453.78
479.108	2089.65
619.189	3668.92
694.297	3561.95
438.269	4330.95
448.811	2991.13
406.189	3425.54
509.757	4121.46
704.212	4668.95
555.135	3053.38
475.108	1359.32
461.595	3324.95
481.027	6773.19
442.865	2181.76
442.297	1981.35
377.459	2832.68
448.892	974.73
473.216	1129.73
440.73	1441.11
403.459	10086.8
474.027	4199.86
514.838	3888.16
573.486	632.568
398.297	6394.03
400.054	2955.12
442.811	12072.5
565.703	4849.02
527.919	2774.89
1255.73	3491.84
786	2196.57
965.838	2865.81
1854.48	2664.65
616.73	3116.35
654.808	2920.22
716.892	1836.19
619.973	2885.22
544.054	1067.65
671.676	2527.49
503	3051.16
488.541	4041.73
487.811	2437.08
454.216	2235.81
458.459	1340.32
572.595	3772.19
501.649	2511.84
536.757	2122.57
560.405	2381.68
677.892	2473.05
513.108	2503.14
471.811	2353.32
467.432	709.784
462.595	3672.38
598.486	725.919
470.054	455.432
510.622	460.541
795.568	338.928
582.405	674.514
534.297	527.243
618.622	2916.43
537.703	710.897
638.462	4185.32
580.486	3518.14
474.081	3580
465.385	3843.16
582.27	2885.95
535.946	997.892
499.324	2608.76
465.378	6952
465.514	4459.78
445.892	1569.6
423.162	3068.43
458.459	3451.86
430	4935.54
416.865	3181.22
466.027	3330.32
454.757	1952.62
450.784	4085.59
431.27	2995.88
452.432	2576.49
466.622	3877.14
456.135	1451.27
500.865	3055.68
472.541	4060.76
408.838	3120.86
483.081	1081.79
416	3172.22
583.514	604.484
491.027	4181.08
439.378	567.405
388.081	3223.89
391.541	3713.68
432.162	3775.32
518.892	5441.16
372.432	2126.67
476.973	4918.6
414.297	3760.35
399.703	2784.57
423.081	4843.22
438.054	4248.05
350.459	1308.19
448.622	2293.68
601.946	290.838
528.135	3317.32
405.919	3997.03
370.054	3163.08
455.784	1578.44
573.405	5036.85
489.027	3208.73
453.595	2801.05
18855.8	1807.84
3003.49	818.676
3197.97	4723.32
2002.05	2415.35
1928.65	2508.76
1606.4	1566.38
1937.72	3744.76
1862.04	2190.76
1434.49	575.054
1154.19	2522.57
1347.43	3648.62
1500.89	808.892
2132.62	1930.56
1782.08	1212.19
1404.51	3625.46
1108.16	1515.75
1157.4	687.811
1594.38	1471.11
1686.38	3676.73
1141.11	3471.22
1710.51	1211.49
1302.7	19329.1
1577.89	3890.84
1299.7	2859.14
1144.46	3591.57
1063.32	720.038
1377.7	1370.05
925.054	4187.35
1616.05	3510.46
935	3309.62
961.243	4684.81
842.568	3548.81
978.757	3771.57
919.216	758.46
936.378	3098.16
767.946	2528.32
762.351	2216.68
914.595	2317.3
903.432	2985.22
1058.05	1999.08
809.865	3875.3
730.297	1845.73
1130.19	733.054
920.649	3294
1026.35	284.962
722.297	3850.14
818.378	4051.08
1045.16	3917.08
851.838	2012.16
856.568	2031.35
615.54	2561.46
832.568	2439.51
696.757	2920.03
745.919	4148.92
852.135	2433.05
1313.13	1208.16
994.243	2655.92
1160.97	2822.08
873.46	2414.27
771.135	2691.78
819.54	3673.79
684.054	1523.7
715.676	2005.51
1013.32	3742.84
996.676	246.425
1124.43	1295.57
918.378	2079.97
745.784	2247.62
720.423	3336.54
560.027	907.486
708.378	1439.38
1244.08	2594.68
1104.54	453.73
710.432	3140
642.297	5700.32
683.703	3352.51
582.676	2852.43
906.676	2440.03
552.081	3761.05
644.189	3306.68
626.081	3727.97
623.784	2179.57
1016.65	2087.24
676.595	3167.38
611.324	495.486
694.811	1496.49
663.649	4560.92
643.946	586.892
699.73	3457.22
927.297	1813.43
1088.27	986.324
1029.87	3342.76
605.757	3767.84
661.703	4244.95
555.27	994.081
651.811	677.378
597.622	3387.24
604.027	4441.35
1031.78	3078.73
608.784	4003.05
645.838	1537.48
957.595	9539.05
898.351	672.676
710.568	4391.54
620.865	4020.16
607.757	620.622
963.054	3590.43
564.919	6889.35
918.919	3908.51
548	2091.54
880.892	6963.95
669.324	5182.78
627.973	3620.65
602.892	2262.97
560.811	743.351
532.676	2170.89
830.595	1254.35
850.54	3043.89
887.297	1445.08
588.378	3090.3
857.892	2425.88
588.054	4061.51
493.243	3456.81
578.135	1212.89
564.462	2824.03
529.135	3006.35
540.514	508.054
615.568	1349.19
657.405	7455.58
676.838	1116.87
620.351	3311.46
585.378	3217.89
635.919	2735.97
581.622	3488.46
508.486	2663.3
554.827	2420.84
579.865	2357.65
580.351	3441.11
817.811	5542.14
613.154	3433
897.432	1187.73
572.919	3703
550.216	3511.89
647.162	578.887
560.622	2844
651.946	3257.57
587.405	2992.24
525.189	4967.97
603.27	3340.95
674.676	1157.49
588.703	1447.16
555	2984.16
908.595	15697.4
852.568	2150.43
545.846	3576.65
665.162	871.022
531.54	3637.56
508.676	3204.86
523.622	764.811
469.135	2439.24
698.973	3633.89
510	1962.51
500.108	2113.97
597.189	615.757
511.243	16579.9
491.838	2345.41
593.432	4996.84
547.54	3073.14
572.757	2682.84
456.189	2717.95
580.378	2068.24
780.784	2285.49
581.351	3078.35
432.486	3185.35
610.189	3989.37
664.27	1861.54
430.649	1097.87
457.378	2836.43
830.243	2405.3
585.784	3252.65
440.838	3403.41
447.73	3044.97
912.317	2623.65
383.054	3357.78
534.162	488.475
357.297	3716.89
740.135	413.649
503.027	4837.53
1776.65	4323.05
1966.95	2489.41
1364.11	2468
806.441	3182.24
1273.38	2179.92
704.04	2362.57
1058.54	2452.7
1117.81	3109.51
673.892	3970
697.378	525.112
1102.62	1829.54
716.243	1277.75
792.243	1932.05
692.784	3087.41
647.135	1363.43
552.946	1350.95
824.892	1359.32
632.081	658.514
571.811	3426.27
594.486	3674.57
573.135	2001.6
1127.32	1788.62
550.46	3869.51
482.026	454.363
571.514	4523.38
633.784	2033.76
964.27	2838.51
538.514	3327.32
584.73	3380.41
519.703	1464.3
552	1979.02
787.784	3450.16
774.649	3022.68
542.649	2713.76
437.892	2612.05
801.784	3292.62
488.324	669.595
709.27	3399.3
615.622	567.892
541.73	4756.84
477.919	348.027
866.703	4529.35
647.108	3161.57
484.649	4055
563.081	513.673
495.459	3809.76
436.622	3604.3
463.946	800.009
615.324	2145.97
543.027	10151.7
487.351	3310.11
657.946	2407.78
557.351	3649.24
450.703	2646.46
889.973	2258.54
606.378	4770.08
834.865	3834.22
2211.73	1765.68
2702.95	2891.05
2793.51	5471.3
1709.92	852.115
1540.03	2263.16
1550.76	3271.62
1379.22	2655.32
1213.7	2246.14
1160.97	3997.62
1307.38	1101.76
1024.32	2169.51
1083.4	1457.05
974.243	964.103
908.622	3863.15
895.216	3463.35
868.081	782.216
890.108	4389.62
837.081	2866.57
871.054	1385.51
788.784	1507.62
961.378	1409.27
884.514	1344.85
994.595	2045.31
912.108	512.622
828.946	3495.92
762.514	2234.62
892.946	3324.92
821.757	1765.6
749.324	1255.38
878.324	3926.1
771.973	2247.97
789.946	1593.54
774.351	1789.43
690.486	5389.95
813.6	578.514
829.568	2957.54
757.351	4023.22
807.486	1205.22
751.432	695.703
811.243	1462.7
773.514	4284
736.73	3889.93
787.054	4751.05
806.297	707.027
910.703	1706.38
839.649	577.654
742.919	1197.97
901.946	3389.81
657.946	2405.89
673.081	4008.59
725.27	4474.92
841	4629.6
782.27	467.189
668.135	2826.65
628.432	1556.81
785.216	1157.03
715.973	3238.7
633.784	3450.19
677.703	3232.54
677.622	3127.73
627	2892.41
778.676	1714.68
703.027	590.703
756.27	2213.3
646.297	1594.11
656.486	3161.27
675.108	1834.06
683.811	3127.08
718.405	3524.51
737.46	2160.51
591.784	3610.43
639.703	1329.6
665.162	2429.76
653.919	1986.05
650.676	3434.05
918.27	4266.7
615.216	1231.4
690.324	2515.89
757.811	3431.27
686.73	776.486
710.486	326.096
703.216	2917.95
701.703	3539.24
617.486	4248.32
610.162	3487.27
647.351	7906.68
631.568	3173.11
738.162	1803.84
654.865	3915.49
650.892	3363.95
638.595	503.027
669.757	2861.97
609.946	1316.65
620.351	3111.19
636.757	3320.35
627.243	4189.81
638.757	2886.38
623	2469.11
650.811	655.788
587.54	1542.97
636.676	1798.3
610.324	1764.62
547.027	3327.03
599.595	3623.89
618.162	4002.76
611.027	2460.15
571.973	2883.22
558.973	3389.46
643.676	1329.08
650.892	3410.49
688	2829.41
598.324	963.351
598.216	1635.68
641.27	2928.95
487.811	995.486
638.946	2843.59
582.93	801.081
669.514	3397.05
524.108	2030.76
645.087	2873.35
618.517	815.54
679.973	3444.95
646.135	2159.3
566.73	3026.32
549.27	2527.24
507.622	3103.35
535.46	2554.51
490.486	4452.43
572.243	2974.92
545.189	5013.58
513.919	4426.68
476.514	3293.78
582.135	2307.38
567.46	1819.54
604.514	643.757
519.108	2681.92
506.649	4361.73
555.27	2887.68
447.27	1159.72
561.838	2461.84
604.622	4273.46
1359.3	3970.14
1074.46	3714.32
656.784	3935.78
717.46	587.54
798.27	3080
697.324	4090.89
666.676	2389.59
668.46	3269.62
689.081	2466.22
669.27	4679.97
625.216	1091.46
615.784	862.216
621.73	3642.32
551.622	2668.97
488.946	2933.81
640.622	2880.27
592.216	3435.52
602.108	2971.76
485.135	3444.62
488.541	4517.14
543.703	3030.57
402.054	923.757
610.189	2140.73
3576.3	766.757
3227.94	3900.7
2741.49	3148.59
2987.43	4180.22
2850.43	1513.62
2219.32	2418.43
2583.03	833.649
2109.97	543.946
2331.79	2190.32
1452.81	2911.3
1495.95	2848.86
711.351	3660.57
830.946	1409
807.7	3369.35
696.378	3904.05
929.216	4906.03
782.351	2159.65
807.514	2360.57
745.919	2479.08
645.892	1533.87
849.865	3185.41
855.919	3010.38
648.162	240.703
671.324	4368.51
752.757	974.54
648.892	2058.08
786.189	1569.03
717	2750.11
601.514	1876.62
636.432	3882.38
521	1954.51
577.432	723.081
740.757	955.054
629.054	2498.92
724.108	795.405
845	2878.54
718.973	3881.57
707	1483.75
614.676	600
728.216	2297.08
689.162	5023.73
597.892	2518.14
805.946	4134.7
571.351	1221.24
763.297	3205.22
636.622	2184.68
573.27	3593.76
728.216	2750.14
583.405	1844.13
591.946	3477.38
699.784	3172.84
690.54	1726.5
630.46	269.378
575.081	1870.27
463.027	530.975
575.946	3178.84
566.838	2689.7
586.676	681.75
517.676	1717.22
590.189	2755.27
578.676	2692.95
520.216	411.865
456.73	464.243
1929.08	1924.95
1719.22	2043.92
1515.32	3062.86
922.54	1909.3
854.919	2911.51
863.946	5031.65
627.135	645.211
623.54	1275.9
597.31	819.54
511.297	3886.14
553.919	3052.97
362.432	3036.46
344.081	1343.21
371.892	3203.22
362.514	1018.6
352.081	2592.51
306.973	2754.16
318.162	3047.65
362.324	1422.3
306.486	3095.78
321.135	3878.22
296.514	3557.11
295.811	4206.4
282.649	2954.65
335.189	2593.51
270.081	2501.38
287.027	1586.54
279.73	1970.46
299.892	1481.95
411.351	2966.43
327.459	3490
333.324	3637.68
293.27	869.27
283.243	4492.11
289.892	500.973
251.351	5495.24
270.486	1178.35
288.432	658.108
319	2940.92
330.216	1070.35
326.432	1725.33
352.514	4048.62
304.865	4697.86
305.703	1080.93
340.486	13219.3
374.108	3643.54
312.703	709.514
313.946	2419.37
304.405	3627.86
308.486	2887.73
326.703	4046.62
302.486	678.568
330.108	1573.73
318.351	3655.3
429.811	2741.78
289.054	4940.19
239.054	754.135
269.949	3802.62
226.081	4954.22
802.808	5136.3
584.536	6827.97
382.654	3470.89
399.288	1153.97
325.134	898.885
315.712	1168.16
263.866	2967.03
289.568	2929.89
324.062	1034.87
248.258	2016.92
266.712	2549.89
240.062	3932.49
241.243	1770.78
266.108	2139.78
236.825	3045.51
270.775	593.351
217.474	2617.57
217.662	1130.57
236.676	2782.11
234.488	1218.62
232.162	3079.89
254.923	1384.32
343.34	1177.46
537.225	1455.73
302.649	789.405
276.162	955.135
218.962	3310.73
242.613	7429.27
336.324	2994.57
240.685	1314.84
335.4	3738.86
381.192	5861.84
344.324	608.135
285.925	3037.65
291.462	1590.62
274.115	2253.35
269.738	12377.8
237.637	3353.76
316.327	2309.49
270.75	705.676
253.693	2297.22
261.703	2478.3
269.676	3217.54
255.188	1604.97
289.865	1779.03
288.27	4989.76
252.312	4041.59
261.275	2233.05
300.027	3126.95
267.054	3796.95
281.595	2158.81
238.981	3285.95
240.054	5502.89
286.519	563.243
256.639	3638.11
273.378	7215.49
437.241	2704.35
375.558	2004.11
316.288	4199.95
315.811	3473.68
277.541	2814.35
285.892	3426.08
269.577	520.938
295.938	2573.86
268.514	13957.2
234.459	1949.65
217.108	2735.3
229.081	694.865
1452.72	1622.08
1157.35	4893.24
1085.48	838.892
740.378	610.243
1031.73	1536.65
741.297	2990.57
673.525	4478.49
959.081	3692.65
612.195	3519.76
575.188	2776.49
592.405	3978.38
681.54	2802.24
791.622	2504.51
609.514	2069.08
607.154	2791.78
561.649	1418.23
642.054	4550.14
602.243	2433.97
533.378	3917.65
562.432	3296.19
678.027	3526.05
457.173	2349.86
533.568	3474.59
509.622	2313.95
494.27	2297.19
537.082	366.486
534.243	2281.97
492.27	6797.49
491.784	978.514
536.731	3848.73
504.811	2665
539.27	760
622.216	1331.22
549.519	785.766
526.513	3648.35
534.46	2609.41
456.541	4285.68
510	468.216
493.65	560.784
714.784	2697.86
576.784	2263.54
402.865	4837.89
528.962	3298.27
446.019	836.526
493.788	3295.43
493.432	1500.6
464.775	1530.89
471.919	2904.95
436.784	3688.59
541.216	3826.19
449.838	8073.46
490.297	3205.68
380.054	4272.08
480.462	1856.84
495.459	2081.59
417.775	6120.49
423.054	4192.49
496.811	3221.03
457.225	1990.92
578.784	2154.27
507.919	2268.51
513.058	2904.51
511	2494.65
440.558	2614.08
535.058	703.892
436.577	1378.4
422.865	2172.27
420.189	2002.58
418.27	3415.81
516.649	3733.57
450.162	3030.95
433.195	3439.16
507.514	1784.65
543.962	815.514
431.432	2472.86
411.162	3674.08
448.297	5180.81
565.405	555.757
533.216	5688.84
407.788	2538.11
564.918	2037.68
429.324	2635.81
556.324	1590.62
450.058	3266.31
473.081	2406.86
1771.92	2635.97
708.927	556.02
494.622	2093.86
511.108	1855.43
758.703	1629.3
533.019	2412.59
403.243	1033.08
530.324	3696.22
514.865	807.243
597.888	2773.22
476.568	1286.65
425.432	3418.51
537.081	556
405.081	901.808
451.784	1565
420.363	820.865
468.811	5016.49
564.351	3562.78
431.432	2168.73
393.919	2189.49
433.108	607.946
425.73	1770.08
536.73	767.595
419.486	972.875
467.811	848.638
339.622	3146.51
393.324	730.216
454.73	1611.44
345.108	1021.32
374.432	1353.87
492.354	3800.84
561.973	7020.89
465.432	449.378
390.378	1919.95
521.486	1068.4
410.135	1239.51
4631.98	3352.7
2532.06	1332.78
2005.77	464.811
1824.34	2774.22
1750.37	2095.65
1574.54	3700.89
1672.65	2734.32
1124.52	1441.78
1044.33	3866.38
1125.46	3190.43
1585.75	3307.22
933.612	1441.73
1467.89	3389.78
1354.91	2822.59
992.481	5467.57
1692.92	3588.7
983.481	2204.43
1007.75	1675.49
1245.91	1275.57
1148.54	4646
858.225	3545.24
947.412	1783.23
776.231	4535.49
827.175	2971.95
831.052	3372.7
972.907	4679.52
1311.05	2983.85
763.801	3181.7
920.781	744.27
1019.6	2755.43
1110.33	4326.84
840.893	3849.32
880.247	457.676
822.558	5710.03
995.11	2095.49
965.54	696.442
834.077	1491.76
836.558	3203.27
808.075	1669.24
756.231	3305.19
981.324	1762.62
1293.91	2776.92
744.5	2011.78
1162.68	882.73
661.405	3754.3
643.425	1952.27
871.019	441.946
1207.29	3980.76
779.763	3778.05
927.054	3094.51
683.625	1831.11
710.538	3751.76
953.596	2968.81
698.038	4652.7
764.154	262.216
1078.87	3468.92
703.515	2183.65
697.27	3340.24
643.212	1422.87
697.093	911.054
706.85	612.595
755.676	1715.11
721.361	2567.78
751.942	3418.59
570.577	3698.92
707.595	3655.16
610.351	470.676
710.907	3777.43
901.811	3501.65
665	4097.68
631.404	3490.73
722.649	6720.08
655.538	1377.58
658.615	3508.19
615.481	3332.86
621.784	2399.32
734.405	1663.11
530.649	1289.37
693.486	434
575.589	4551.65
696.327	2847.92
671.243	3562.32
538.54	3069.51
708.27	805.432
551.231	699.595
547.189	3214.92
691.73	999.703
498.45	1848.43
642.923	9471.05
633.243	4158.16
743.243	3647.81
557	1520.95
541.018	2405.92
509.405	720.351
558.27	2530.3
629.654	7904.38
572.946	3778.3
547.081	2161.14
564.351	2787.62
509.514	2597.65
457.027	3437.54
563.432	3139.35
474.919	982.378
538.005	4370.84
566.058	700.216
619.46	2406.19
642.54	3498.22
466.738	4038.35
483.946	3256.57
498.654	2091.27
625.216	605.243
586.811	614.649
536.189	3615.22
468.784	3503.84
555.807	1710.11
567.216	5395.11
524.622	1855.6
471.324	3750.91
416.027	4094.32
525.763	1443.92
538.946	3457.62
424.973	3493.11
589.676	3143.19
425.27	1278.67
572.115	854.568
501.775	3013.49
484.981	4884.81
448.595	1052.86
403.189	3159.05
493.378	638.081
516.259	3281.29
500.432	2085.95
509.486	2447.76
412.212	1249.16
418.173	5623.19
400.838	1310.23
503.808	3742.68
520.486	3278.57
480.757	1408.13
451.703	3881
459.865	3589.16
456.865	2186.56
453.216	2391.51
486.946	2692.89
398.216	5051.3
512.162	446.135
360.432	2555.43
1485.87	3117.05
1678.89	465.676
841.613	649.514
682.892	2362.92
738.135	1614.43
874.038	480.973
656.081	1862.32
733.514	265.432
751.676	4364.32
494.946	647.784
615.703	2884.46
671.875	404.73
898.243	3387.05
846.243	2777.81
697.568	2720.92
519.432	2071.32
541.027	3224.73
808.25	3494.46
693.784	5323.11
517.757	2717.73
487.189	2791.16
503.405	1236.92
699.243	2337.86
605.081	526.162
559.595	1368.03
546.514	3207.76
563.189	3444.95
542.162	2353.62
637.019	1957.87
483.622	3751.68
463.081	3383.46
506.541	2924.49
521.946	3095.95
497.378	4374.86
570.654	6484.68
387.405	762.297
499.595	7720.35
504.676	795.946
459.243	4214.68
651.568	944.432
562.125	2118.41
516.757	3791.14
541.46	3559.05
485.405	3665.46
396.054	1003.94
396.568	3157.19
419.027	3786.65
569.135	946.757
493.865	5489.43
437.432	4888.11
477.514	2581.57
455	3624.76
392.297	4173.32
476.378	2169.86
362.892	1176.24
437.318	687.703
470.054	3835.24
420.378	3651.49
510.811	2036.16
351.946	3587.43
790.595	3314.18
383.432	905.054
438	3356.89
400.838	3084
5110.76	4027.3
4464.14	2367.76
2972.82	3640.81
2748.02	3547.16
2255.84	3717.95
2124.54	3540.49
1993.83	3184.49
1966.49	2053.46
1772.03	1295.43
1558.29	7654.62
1543.51	4158.68
1667.92	4739.65
1357.49	4013.14
1592.95	3500.54
1110.98	3586.86
1127.81	1821.81
1387.54	623.108
1157.32	783.05
907.5	4421
1211.7	3081.97
1089.43	3107.27
1010.21	3634.97
945.55	1049.49
1024.05	5755.14
1008.4	2719.95
989.175	4270.46
1014.35	812.243
834.125	1196.4
1045.95	3239.49
1295.94	3431.43
906.432	3283.65
1158.32	6656.43
838.486	3435.78
875.562	3264.11
846.85	5335.84
929.216	3287.22
895.703	2622.7
952.77	2036.92
817.027	2719.64
780.654	3604.27
880.73	1512.03
733	3210.11
1096.08	1860.57
939.811	1871.87
966.425	3564.3
751.919	1256.19
1066.68	1411.27
900.138	3311.97
850.757	694.973
996.154	484.378
725.46	1574.38
743.27	1428.87
925.027	2164.95
680.676	1782.08
998.246	4062.11
922.27	1601.46
711.481	3793.03
902.212	1246.84
947.703	425.865
712.297	1329.87
716.189	3984.32
821.981	2593.27
889	3498.86
743.703	6452.11
705.703	9117.22
663.73	633.405
693.65	2256.08
688.237	3008.73
853.676	1674
827.486	3726.57
758.504	1738.84
799.784	1850.7
679.404	2462.95
853.297	2495.41
771.853	3625.51
660.6	641.595
677.027	7627.93
813.622	3143.6
757.162	2435.51
929.784	990.622
749.905	778.432
582.212	2249.11
673.019	3976.81
656.46	2346.59
789.46	2033.38
763.784	1487.7
735.189	1334.69
955.231	2480.08
650.108	4637.92
622.351	3729.95
678.027	2611.22
663.757	2978.05
832.45	3105.68
674.405	3861.7
696.711	3779.78
700.162	5601.76
618.432	2111.51
761.865	802.385
714.588	859.324
642.438	2068
737.827	3652.14
670.703	3389.11
659.378	5144.27
615.794	2509.27
717.3	2845.43
623.54	531.904
681.308	423.946
673.635	2419.7
677.108	3575.19
836.324	548.027
572.365	3128.19
662.514	4207
783.081	3870.41
736.275	2988.84
807.27	931.919
685.405	732.514
602.654	3745
700.297	3956.84
512.888	6632.46
574.405	3746.3
635.962	1030.24
731.568	1744.51
742.405	3924.76
757.108	1636.27
529.081	3340.03
693.54	669.027
739.955	4171.43
571.981	1827.87
648.568	2856.65
784.521	2560.49
796.27	1447.78
600.595	3700.38
687.676	3877.03
672.568	3248.05
536.838	2924.1
679.351	1408.95
566.173	2842.81
662.887	1616.75
654.981	2245.41
600.622	2220.32
644.763	4530.84
585.486	2024.11
609.712	763.216
632.514	1938.54
670.351	1542.81
635.904	652.9
588.536	3402.43
736.838	2656.7
577.243	1230.27
550.135	1075.84
586.243	509.65
691.54	1338.51
670.162	1131.4
676.154	1173.97
674.654	2281.08
589.725	3930.43
657.703	998.324
494.757	754.405
635.946	2539.86
773.189	1048.38
627.919	2580.27
613.351	3191.27
550.811	3701.78
614.2	4317.68
690.595	1609.35
629.54	3995.01
635.162	2347.03
530.125	3387.81
600.425	4014.3
543.375	3089.43
615.784	3848.73
549.712	3630.84
581.216	4311.24
530.385	2070.16
552.189	1665.57
598	3777.81
530.346	3028.62
[truncated: 31,816 more rows]

## Sheet: Figure 1F
empty	FCHo1	FCHo2
624.444	1368	2704.56
635.143	1333	2644.78
593	1335.4	3704.02
647.895	1410.57	3377.82
593	1341	2422.12
602.333	1358.83	2445.33
644	1430.67	2577.38
626	1644.74	2386
633.583	1389.71	2780.02
631.571	1971.2	2787.04
642.571	1343	2614.86
600	1349.75	3903.19
653.714	1583.71	3014.54
622.5	1353	3097.53
840.932	1677.83	2851.09
615	1330	2654.3
650.75	1403.62	2887.84
825.323	1815.56	2689
610.636	1323	3478.11
693.767	1311	2628.58
701.125	1449.1	2973.87
666.458	1369	2380
708.115	1384.8	2484
1000.05	1597	2537.88
802.25	1967.6	2528.83
606.5	1402	3039.59
624.25	1478.13	2878.34
685.9	1577.07	2410
638.105	2335.49	2585.79
667.179	1624.39	3325.32
852.519	1384.2	2679
690.5	1908.25	2641.67
623.5	1586.67	2611.75
712	1364.4	2470
720.783	1766.49	2455
690	1677.58	2682.33
604	1654.68	3825.63
722	1889.4	2803.36
598	1454.56	2775.18
688.957	1685.3	2577.18
604.5	1312	2886
728.524	2088.45	3059.27
974.3	1372.67	2499.89
657.571	1462.71	2908.26
682.894	1619.75	4016.49
609	1442.42	2431
609.875	1539.94	2929.25
778.373	1332	2542.75
617.143	1721.75	2791.87
623.167	1378.33	2796.31
744.25	1541.85	2448
636.846	2303.79	2867.37
643.1	1431.2	2692.82
610.8	1972.48	3298.89
810.709	1504.7	2486.85
805.25	1409.67	2484.86
668.471	1371	2517
605.333	1655.61	2670.21
664.308	1481.12	2657.25
715.949	1459.25	2453.2
615.6	1837.77	2434.9
775.354	1400.45	2430
616	1674.78	2813
734.526	1339	2782.7
781.615	1537.38	3335.42
596	1688.67	2802.49
656.182	1541.45	2486
595	1346.5	2923
593	1355.56	3008.34
971.837	1493	2781.93
606.5	1425.86	2499.33
995.312	1504.18	3046.34
641.833	1449.38	2874.07
631.167	1732.48	2437
604	1745.84	2612.9
753.333	1339.33	2598.57
968.352	1411.85	2700.53
646.421	1384.6	2531.23
943.771	1418.83	2954.71
826.963	1557.8	2862.5
684.667	1337.75	2428.5
644	2227.12	3159.54
648.111	1354.83	2693.94
687.708	1504.43	3231.36
634.5	1569.56	2441.5
631.3	1342	2651.62
658	1346	3712.79
815.233	1391.2	2527
618.667	1697.96	2658.07
603	1392.71	2547.8
595	2316.81	2587
727.824	1342	2475.5
798.505	1356.86	3522.89
681.12	1337	2700.77
784.579	1401.93	3014.76
920.452	1530.03	2477.71
694.407	2045.77	2566.71
776.667	1413.22	2962.9
767.125	1479.33	2537
607	1385.62	2540.33
712.7	1332	2551.33
597.667	1509.21	2843
771.085	1680.57	3004.8
699.412	1566.75	2465.5
717.2	1328	2647.62
601	1963.45	2635.83
619.2	1556.44	2641.4
713.681	1630.69	2434
745.69	1410.5	2493.33
651.588	1465.58	3005.88
746.933	1377	2506.5
830.366	1574.05	2431.33
688.943	1337	2740.24
1049.73	1362	2614.3
604.5	1384.62	2520.53
805.286	1353	3571.22
618.833	1635.29	3011.57
594	1565.18	3763.88
602	1545.12	3071.03
718.812	1504.88	2643.91
659.25	1392	2644.78
633.667	1790.09	2840.39
645.071	1400.71	2492.25
1310.56	1371.5	2426.33
810.14	1396.88	3160.14
947.59	1626.91	2981.18
611.2	2392.29	2417
711.526	1513.28	2842.93
824.071	1482	2469
647.167	1617	2597.8
593	2745.8	2982.82
618.667	1331.5	2538
617	1441.12	2761.77
621.5	1548.48	2833.26
685.45	1445.17	2482.6
917.667	1332.5	2506.25
651.545	1346	3560.53
647.167	1607	2454
1030.94	1407.67	2648.37
840.296	1408.44	3106.28
948.932	1376.5	2558.62
668.143	1539.8	2921.61
792.607	1397	2413
657.55	2498.45	2943.33
832.114	1571.6	2444
620	2554.8	2794.94
706.7	1411.5	2440
705.571	1315	2774.12
611.5	1334	2415
627.714	1538.2	3572.04
828.5	1362	2593.2
715.829	1703.16	2576
684.708	1374.17	3393.18
690.312	1418.38	2993.05
608.5	1444.55	3655.93
701.333	1500.53	2562.5
610.857	1736.68	2555.75
650.143	1396.8	2517
890.64	1418.12	2460.4
663.889	1372.12	2445.33
1074.94	1891.9	2989.75
631.5	1377.92	2958.7
714.158	2602.81	2633.83
611	1660.95	2628
598	1570.11	2493.5
620.2	1593.87	3332
958.241	1629.35	2393
638.25	1345	2466
870.57	1513.27	2593.76
762.404	1411.57	2642
676.429	1326	2798.12
708.815	1326.5	2611.88
698.409	1524	2625.83
648.143	1320	2408.5
745.078	1500.2	4219.4
671.333	1441.83	3216.96
597	1647.79	2441
618.167	1314	2523.17
698.75	1415.5	3161.46
722.4	1342	2849.5
673.643	1332.33	2572.5
650.385	1567.56	2526.4
796.25	1370.2	3369.19
694.278	1762.59	2623
608.333	1313	2545
621.333	1332	3316.98
647.2	1419.17	3070.98
638.222	1515.32	2592.17
701.188	1393	2482.93
698.145	1416.8	2611.57
738.55	1585.52	2429
645	1359.5	2486
663.571	1506.22	3044.29
694.542	2107.26	2486
833.978	1422.5	2470.8
753.204	1496	2555
638.8	1384	3902.01
1146.81	1406.4	3409.39
615.25	1370.88	2739.47
732.231	1432.33	2536.6
618	1899.59	3416.25
608	1942.62	2641.5
674	1322	2679.6
667.833	1345.33	2409.67
617	1648.07	3016
911.958	1335.5	2912.96
799.288	1596.16	3090.17
655.75	1665.34	2855.54
657.692	1529	3984.37
748.785	1864.48	2858.46
829.589	1370.75	2555.5
606.667	1556.23	2855.22
614	1647.03	2392.33
610.333	1454.5	3672.79
620.333	1468.25	3003.1
673.111	1621.27	2612
657	1696.74	2861.44
723.274	1548.71	4629.51
666.167	1402.92	2878.14
640.8	1384	2863.95
890.714	1540	2484
607	1368	2880.7
602	1490.8	2632.09
612	1332.5	2990.53
641	1496.4	3400.48
670.5	2009.69	2420
872.224	1466.2	2726.85
746.115	1485.5	4098.77
685.593	1486.83	4246.49
665.545	2554.66	4373.08
729.212	1448.12	2631.78
619.5	1456.2	3798.02
612.833	1351.4	2388
601	1571.93	3903.61
695.316	1575.12	2594.59
699.905	1398.62	3009.43
627.25	1318	3167.02
685.7	1806.44	2428.33
614.333	1684.56	3378.65
596.5	1823.71	2845.3
629.5	1797.33	2962.21
604	1428.88	3539.71
874.871	1667.07	3443.72
608.5	1553.77	2782.72
617.5	1531	2418
883.182	1351.2	2876.26
643.167	1349	2717.52
924.385	2219.82	2634.88
653	1455.25	2819.32
613.5	1350.5	2503
659.857	1359	2418
760.463	1433.88	2427
640.667	1356.5	3102.67
604	1439.14	2423.5
851.317	1347	3124.85
693.22	1385.33	2473.75
613.5	1388.69	3438.07
632	1519.33	3179.09
595	1336	2890.73
639.5	1554.08	3548.1
748.6	1534.55	2660.27
680.643	1410	2557.83
674.621	1398.67	2410.5
593	1373.8	4111.31
660.833	1785.39	3005.23
645.111	1434.7	2991.88
629	1696.03	3455.39
617.333	2076.14	2876.44
666.118	1498.12	2403
601	2821.8	2947.22
643.25	1384.25	2925.52
629.5	1465.67	3177.67
610.8	1701.31	2738.91
654.4	1625.63	3482.09
638.6	1500.1	2679.31
707.182	1478.56	2497
635.5	1479.47	3142.53
628.643	1421	2478.25
849.975	1791.73	2403
619.5	1634.92	2924.84
757.904	1461.12	4827.34
719.952	1460	3071.77
618.75	1505.67	2856.06
635.375	1834.6	2844.81
623	1390.75	2842.86
1059.1	1474.55	2587
604	1498.31	2704.09
684.643	1358.5	2827.68
618	1494.18	3239.93
691.985	1474.29	2550
666.769	1477.45	3163.15
602	1396	3635.73
664.808	1933.84	3564.14
611	1389	2827
699.567	1324	2718.73
606.333	1338	2409
768.052	1571.12	2516.25
681.75	1566.38	2436.67
628	2020.33	2558.5
698.929	1937.63	2670.11
612	1358.5	2429.5
785.065	1379.25	2468.25
624.125	2877.9	2534.94
722.98	1804.28	4860.07
738	1433.6	2953.8
601	1497.56	3383.63
627.545	1433.11	2581.39
609	2234.42	2577.43
968.16	2540.02	2668.39
638.667	1372.5	2703.9
661.357	1505.07	3241.39
612.6	1492.71	2838.89
700.706	1703.79	2758
644.875	1509.15	2605.56
638.667	1872.09	2510.2
623.667	1442.5	3296.62
665.647	1409	2693.85
613	1507.26	3879.02
663.214	1344.25	3235.79
606.444	1537.17	2582.61
618.667	1886.04	2411
609.5	1356.33	2696.3
609	1476.91	2572.83
846.41	1315	2605.67
602	1276.12	2560
622.714	1188.25	3023.09
912.542	1340.6	2400.5
958.395	1288.17	3670.92
801.667	1179.5	2633.92
615	1434.68	2811.54
655.818	1265.75	2574.82
595	1340.32	3001.78
608.5	1177	2439.17
668.5	1442.68	2749.69
667.222	1699.13	2828.86
603.5	1239.75	3316.11
628.077	1192	2785.14
720.5	1515.05	2658.57
709	1217.1	2837.09
708	1858.61	2636.84
825.632	1229.75	2642.71
705.5	1183.75	2946.84
1186.61	1237	2503
720	1227.8	2622.94
1354.98	1474.26	4431.71
717.667	1447.58	2640.38
802.816	1199.75	2515.11
723.5	1263.62	2557.69
811.059	1160	2557.67
739.714	1159	2477
815.4	1825.43	2563.33
793.714	1213	2577.71
744.8	1375.17	2674
845.435	1757.87	2701.83
810.741	1283.4	2583.5
915.279	1671.43	2745.04
815.436	1174	3023.23
758.963	1353.5	2609.67
723.8	1395.97	2885.39
855.429	1788.04	2572.76
939.273	1472.15	2691.25
770.733	1181	2738.86
1005.42	1235.33	2526.33
812.417	1268.5	2732.64
705.5	1248.5	2464
742.5	1492.46	2831.17
900.722	1151	2495
802.514	1418.5	3260.86
792.529	1512.23	2504
705	1291.45	2585.44
795.412	1610.88	2616.62
761.6	1297.33	2893.36
872.897	1204	3066.15
818.464	1489.82	2781.88
882.576	1423.81	2503.88
730.5	1188	2972
803.05	1253.7	2591.5
762.381	1251.56	2568
713	1728.9	2840.22
727.714	1207.86	2609.88
767.833	1259.33	2818.2
872.362	1184.71	2530.67
760.357	1235.25	3042.45
754.667	1319.27	2722.5
783.067	1656.45	2570
710	1349.94	3500.11
735.75	1177.67	2606
900.351	1384.85	2554.44
886.432	1800.3	3113.07
792.111	1173.8	3137.24
1068.76	1563.94	2494
890.432	1198.2	2914.61
800.714	1155	3016.8
859.163	1408.41	2913.4
737.25	1183	3560.12
725.25	1203.75	2802.83
865.562	1169.5	2572.5
738.833	1184.67	2532.43
984.75	1202	2676.07
823.156	1328.18	2774.57
754	1254.56	2573.5
708	1306.83	2869.09
794.308	1257.71	2576.14
728.4	1172.33	2831.15
718.875	1273.23	2597.67
736	1315.38	2738
753.9	1232.33	2465
952.242	1197.5	2647.89
747.6	2161.85	3037.64
728.5	1213	2849.59
717.5	1590.78	3358.05
825.395	1649.63	2580
721	1785.4	2481
744	1329.27	2517.75
744.444	1454.25	2785.77
709	1721.76	2794.15
789.556	1198	2713.36
753.5	1151	2606.33
777	1543.96	3532.41
856.333	1434.77	2812.2
723	1226	2678.33
739.667	1202.33	2962.33
736.667	1283.82	2654.12
733.5	1424.77	2678.8
720.333	1261.14	3818.55
766	1304.55	2483
994.126	1785.64	2867.11
712.5	1260.25	2491
777.846	1164	3125.07
756.6	1191.5	2553
810.85	1363.64	2773.42
965.206	1151	2947.14
1025.93	1178.67	3045.61
951.075	1351.08	2735.97
725.143	1262.5	2512.33
761.625	1334.48	3047.62
703	1191	2624
764.6	1449.07	3344.02
972.63	1183.33	2784.55
790.75	1465.4	2793.54
785.643	1154	2785.56
727.667	1244.8	3644.85
874.742	1176	3336.42
785.61	1286.22	2927.17
792.895	1192.88	3648.89
775.731	1173.5	2528.12
792.25	1456.26	2914.82
733.8	1777.08	3250.42
794.167	1195.67	3493.77
723.25	1559.72	3430.22
769.586	1346.63	2725.18
956.729	2804.4	2857.7
768.857	1261.57	3010.15
747.625	1489.58	3324.67
888.235	1759.86	3422.57
737.333	2137.14	2636.5
738.286	1298.67	3300.9
1006.61	1247.73	2875.15
850.895	1515.2	2489
708	1171	2536
782.933	1489.42	2573
788.769	1196.2	2952.88
747.364	1272.83	2689.89
726.25	2127.32	2739.2
948.714	1835.95	2936.76
809.231	1273.38	2585
1023.25	1516.62	2469
770.607	1235.75	2493
811.862	1198.5	2798.67
887.8	1525.83	2495
778.769	1541.98	2625.29
802.25	1811.59	2740.3
753.786	1787.2	2673.9
719	1291.75	3184.87
899.347	1158	2621
711	1295.7	2572
804.283	1221.88	2599.6
735.6	1601.18	2800.07
710.6	1218	2472
797.111	1239.57	4457.12
787.688	1241.3	2520.5
737.444	1235.71	2639.25
740.4	1440.2	3071.52
788.562	1351.65	3290.06
874.471	1622.25	2745
807.6	1522.92	3434.68
764.9	1200.5	2588
725.667	2075.4	2522
713	1772.8	2536.5
703	1158	2836.31
706.5	1157.5	2739.9
874.087	1311.45	3474.56
761.405	1178	2628.6
780.25	2031.73	3054.88
973.146	1488.02	2487
798.7	1292.43	2651.5
989.963	1224.75	3358.69
729.667	1552.53	2747.77
770.529	1172	2473
1316	1477.81	3009.11
1031.89	1191	2918.22
727.667	1306.82	2567.17
725.5	1304.14	3050.38
711	1673.42	2488
886.08	1247.33	2595.4
705	1239.5	4711.65
776.583	1488.72	2513.67
781.067	1157	5106.32
708	1183.33	2912.47
745.75	1409.67	2795.67
750.5	1303.27	4056
783.091	1312.38	2454
707	1799.73	3062.02
812.333	1248.44	2512.75
937.872	1475.28	3102.28
1294.29	1374.5	3455.35
801.652	1265.8	2462
753.875	1419.43	3041.94
739.889	1716.79	2695.17
726.4	1162	2526.5
815.882	1644.21	2664.91
752.571	1294.75	2862.33
840.667	1537.95	2989.22
747.733	1365	2913.59
788.382	1350.96	5908.41
731.125	1316	2477
739.111	1214.83	3962.87
716	1167.5	2498.6
816.615	1181.57	2523.33
757.545	1361.07	2584.8
726.75	1218.33	3075.79
880.276	1212.67	2898.94
900.076	1273	2635.43
751.5	1274.3	2496
879.241	1430.78	2708.86
727	1310.06	2609.38
707	1231.67	3532.17
720	1309.03	2783.6
782.889	1169	3383.14
786.667	1497.35	2565.5
848.68	1183	2679.43
720.8	1501.95	2558.2
1218.37	1189.5	2671.9
756.2	1188.5	2493
1157.92	1266.86	3978.43
721	1310.79	2778.6
1104.14	1252.55	2917.39
797.357	1445.05	4046.72
822.679	1300.56	2730.58
797.818	1614.6	3743.49
916.086	1208.4	3530.53
987.829	1172	4907.7
755.125	2080.68	3783.06
719.333	1253.67	2901.87
721.5	1179	2489.33
1517.83	1577.82	2570.29
1074.09	1272.44	3340.9
1496.76	1435.94	3432.27
717	1361.46	2736.88
1117.36	1395.84	2767.31
767.286	1565.14	2911.12
735.353	1550.41	2984.11
742.9	1167.5	2492.33
971.748	1226.38	2528
771.357	1159	3083.57
739.444	1410.46	2559.31
718	1162	2899.21
732.6	1184.33	2843.48
737.333	1156	2494.5
760.143	1305.02	3094.4
736.8	1256	2522.33
895.348	1286.44	2581.2
703.5	1208	2558
740.5	1373.55	3083.41
722.25	1287.57	2604
724.375	1278.25	2844.18
716	1446.67	3763.84
730.857	1475.23	3149.3
900.457	1580.76	2593.7
703	1909.44	3096.14
918.41	1303	2503
718.333	1357.2	3056.37
824.476	1198.33	4180.12
780.889	1275.82	2552.75
812.5	1226.14	2530
766.083	1201	2474
722.2	1300.89	2782.95
716.2	1364.75	2810.62
760.4	1673.28	2815.57
717.5	1324.14	3579.97
777.314	1287.71	3675.79
800.091	1384.18	2526.5
734.5	1409	3502.26
1036.11	1652.9	5438.06
756	1407.71	2552
817.2	1250.71	2527
767.267	1282.83	2704
869.793	1168	3462.01
888.67	1191	2779.86
736.167	1293.1	2503
725	1197	4486.26
773.235	1540	2533.25
839.943	1313.5	2793.15
1129.46	1405.2	2903.06
746.312	1174	4235.59
773.333	1158	2555.33
735.333	1382.14	2711.62
721	1386.27	2739.77
854.207	1198.8	2554.86
773.818	1165	2674.9
757.417	1390.64	3386.1
745.571	1259.75	2571.78
745.941	1534.35	2586.6
902.115	1456.38	2836.49
924.728	1247.17	2594.47
774.492	1181.5	2668.78
714	1545.27	5149
777.426	1225	2563
721	1447.28	2792.07
882.062	1969.07	3128.63
877.672	1339.59	3310.52
704	1461	3310.43
714	1554.27	2647.12
733.167	1346.22	2550.64
892.429	1205.75	2552.17
736.5	1178.67	3958.98
996.943	1159	2804
753	1317.67	2847.89
716.5	1410.5	2503.67
801.602	1383.59	2508
818.85	1253	2656.5
760	1257.21	2513.6
757.562	1216.88	2644.75
740.2	1547.05	2569.75
743	1394.91	2911.12
875.15	1208.6	2505.5
1211.11	1188.8	2971.04
713.5	1300.56	3536.74
937.279	1340.37	3396.65
709	1214.29	2699.79
732.2	1220.56	4219.98
922	1604.23	2968.29
928.184	1730.19	2812.67
724	1170.33	2793
745.643	1158	3122.24
824.977	1293.27	3491
708	1156	2959.75
736.636	1211.29	3075.93
717.5	1489.21	2983.31
753.2	1241.5	4469.99
709.333	1201.33	3119.14
878.778	1289.43	2969.11
558.333	1170	4783.32
560.833	1168	3240
948.864	1492.88	2748
593	1264.17	3863.76
766.528	1368.7	2944.57
660.324	1346.84	3106.11
702.6	1259.56	2827
587.429	1588.4	2919.67
551	1259.91	3205.67
610.128	1303.9	2891.29
592.625	1456.42	2783
788.486	1190	3129.07
548	1320.29	4177.38
618.976	1351.84	3783.98
564.833	1780.15	2996.33
593.889	1224.5	3056.71
567	1590.15	3048.8
693.649	1339	3366.04
685	1469.64	2774
757.358	1188.33	3022.67
722.918	1239.75	2962.2
662.373	1197.67	3635.09
572.2	1280.75	5099.82
607.222	1212.4	2850.5
578.4	1304.08	3038.75
611.3	1262.38	3635.34
553.5	1214	5139.16
771.306	1466.31	4113.23
778.781	1603.09	2855.33
630.37	1529.44	3350.25
598.25	1208.67	3114.64
552	1162	4379.46
647.957	1187.89	3618.23
661.235	1154	3163.71
579.571	1302.67	2948
749.181	1425.81	2991.67
759.561	1999.75	3440.13
683.25	1426	3499.67
659.571	1862.14	3430.85
646.159	2312.33	3386.94
610	1791.95	2732
577.5	1424.75	2951.71
630.704	1370.65	5254.19
552.333	1632.55	3273.12
557	1373.43	3720.09
643.075	1353.12	3759.13
549	1378.4	2831.75
660.036	1392.83	2947.12
741.333	1249	2876.67
696.419	1489.27	3079.71
590.25	1370.4	4451.38
560.25	1425.52	2781
697	1479.17	3804.09
630.52	1456.2	3020.14
564.125	2174.48	3177.56
591.083	1386.75	3105.28
664.611	1675.04	4287.48
566	1293	3456.9
627.731	1818.39	2910.67
603.917	1904.12	3177.29
740.559	1336.33	3796.11
549	1253.5	3050.5
603.7	1646.77	3525.24
593.875	1323	3415.44
571	1765.04	3143.28
564.333	2464.23	2801.6
581.5	2204.09	2993.25
628.256	1492.88	5366.09
588.36	1410.86	3152.97
607.778	1314.75	2854.6
567	1501.17	3710.51
604.2	1448.08	3283.22
569.417	1448.6	3320.93
749.933	1262.5	2787.25
652.68	1556.09	2957.8
600.7	1318	2795.5
741.7	1630.38	5238.22
696	1345.17	3578.32
656.504	1347.29	2867
828.083	1702.89	3835.18
667.667	2097.55	4117.12
570.667	1380.86	3707.28
585.938	1433.78	3562.67
549	1643.45	4528.73
588.8	1701.15	3217.67
596.6	1505.97	2804.25
577.833	1397.88	3412.89
565	1465.88	3726.33
672.865	1402.92	3538.93
801.296	1402.75	3475.31
617.438	2266.93	3144.11
633.13	2447.32	3060.33
573.286	1491.34	3005.45
572.667	1710.25	4041.61
670.043	1263.5	2800.67
717.468	1263.33	3036.65
842.523	1259.67	2847.22
846.289	1370.67	2820.09
574.667	1282.5	3554.89
580.571	1290	3884.58
550	1340.64	2842.83
556.333	1317.67	2934.14
639.783	1246	3117.5
572.714	1253.33	3148.83
698.95	1383.8	3202.85
830.957	2215.29	4028.41
652.143	1282.5	4098.9
603.077	1259	3003.36
567	1271	3446.74
597.714	1364.1	3167.17
693.429	1349.4	2783
570.25	1443.59	4018.28
639.067	1334.67	3689.7
602.45	1389.79	2768
668.781	1296.5	3770.25
597.455	1351.5	2864.71
681.191	1246	2816
564.5	1369.77	2754
551	1440.6	3288.64
674.278	2241.57	3334
586.667	1242	2862.88
629.652	1766.33	2784.43
575	1274.5	3165.38
659.385	1429.9	4145.45
773.617	1581.58	3585.6
769.977	1547.13	2788.75
611	1259.67	3532.62
586.28	1735.79	4471.39
591.6	1334.62	4072.07
642.429	1660.06	3173.82
699.471	1986.21	3155.91
554	1593.89	4105.27
647.172	1408.11	4886.36
659.048	1262	2738
739.174	1361.3	4292.57
566.5	1369.43	3696.16
597.5	1481.55	2961.5
628.577	1350.92	4168.07
767.959	1503.37	2930.71
640.222	1380.82	2770
596.4	1270.33	2835.33
564.667	1307.6	3692.64
603.444	1528.86	3051.62
682.115	1282.67	2829.8
592.5	1355.36	3847.82
691.623	1279.17	3833.17
615.074	1386.67	2971.5
571.571	1347	3008.88
578.4	1314	3687.53
606.692	1273	2906.5
592.143	2153.88	3322.76
718.862	1658.97	3120.45
568.75	1322.5	3225.23
558.5	1531.05	3192.84
724.756	1393.44	2767
629.781	1352.88	2735
554	1568.2	3094.18
620.571	1312.64	2809
699.192	1286.8	2931.17
736.055	1249.5	3022.56
636.118	1389.77	3734.74
551	1278.67	3065.15
633.957	1331	2901.93
559.75	1318.33	3678.5
565.667	1770.26	2972.44
689.48	1507.38	2915.71
630.656	1444.04	2748
587.643	1310.4	3692.15
689.826	1370.05	3248.66
676.6	1345.5	3003.25
698.853	1333.44	2882.33
596.75	1281.75	3122.09
620.917	1334.25	3002.7
657	1364.53	3171.56
557	1325.78	2945.83
692.265	1809.75	2802.33
669	1979.1	3546.61
619.154	1994.49	3009.12
615.48	2266.99	3108.64
668.592	1389	3562.65
563.4	1457.7	3954.69
720.576	1353.25	4716.65
575.333	1425.53	3216.23
797.18	1340.12	3707.12
566.75	1385.2	2969.13
694.576	1352.12	3771.75
670.089	1827.77	2842.75
816.94	1811.86	2924.83
614.417	1391.33	2792
591.812	1390.78	2931.33
753.121	1316	3347.18
664.778	1356.25	3597.68
557	1425.5	3201.2
644.263	1268.5	4387.07
644.645	1268.67	2785.5
660.75	1290.2	2866.12
549.5	1406.09	2766.5
788.529	1391.75	4010.79
590.25	1330.75	3287.17
555.5	1523.46	2788
694.417	1463.44	2829.33
688.154	1307	3470.68
715.66	1240	3039.39
675.462	1360.38	3731.12
701.833	1365.83	3932.15
720.663	1328	2852.25
781.216	1264.5	3194.92
616.292	1275.67	3342.82
708.209	1653.16	3131.8
601.222	1368.92	2976
552.5	1304.6	3125.93
762	1437.07	3463.11
658.229	1412.36	3130
639.028	1554.87	6493.65
657.65	1791	2750
568.462	1251	3632.83
550.5	1259	3608.53
802.462	1945	3873.06
592.357	1336.82	2745
595.75	1253.5	2853.2
592.842	1471.06	3019.88
586.193	1362.91	2729
624.351	1350.78	2823.5
671.154	1434.27	2835.4
551	1266	2924.11
606.583	1277.75	2796.5
573.4	2087.8	3412.15
595.4	1802.44	2932.67
563.5	1433.56	3492.66
551	1484.58	3932.82
569	1258	2758
656.324	1263	2987.32
565.5	1450.92	4387.98
551	1255.33	3446.1
564	1609.6	3415.62
618	1409.5	2890.71
663.484	1373.56	2792.67
559	1552.29	2907
598.975	1261.4	3506.14
565	1351.83	3048.75
554.5	1376.5	2840.5
628.789	1640.61	3017.67
859.97	1310.67	2928.33
573	1349.9	3545.27
619.074	1339.7	3996.79
668.222	1395.14	2863.5
606.306	1359	3258.32
573.833	1265	2802.56
588	1245	3217.95
689.841	1269.5	4016.7
570.4	2905.56	2858
615	1245	2912.75
697	1295	4345.7
625.722	1676.13	2969.18
687.225	1649.74	2984
561.333	1270.8	2832.86
650.9	1748.3	3055.64
554.333	1536.78	3962.36
588.286	1473.33	2955.6
559	1287	3092.22
561.5	1386.75	2919.56
677.867	1265.33	3039.86
639.037	1245	2976.2
560	1260	2829.86
568.5	1343.02	3243.13
685.703	1334.69	2971
638.391	1309.17	4287.61
548	1429.48	3988.72
566	1250	3035.56
552	1353.5	3686.39
559.8	1948.73	3165.21
370.529	1415.81	2847
370.529	1438.19	2747
333.071	2764.41	2991.27
370.375	1384.35	3131.86
393.857	1529.43	3117.81
365.375	1385.88	2902
329.714	1379.22	3113.68
370.062	1468.71	3384.86
320.75	2180.6	2899.25
436.905	1300.44	4219.28
344.75	1386.19	2783
331.833	1384.38	3836.8
334	1384.33	3979.6
427.259	1325.5	4428.61
470.605	1264	2875.8
342.818	1321.12	3091.1
315	1461	2932.25
646.879	1243	2862.6
328.5	1635.16	4126.37
430.136	1271	3125.92
324.75	1264	2996.57
330	1251	3679.15
454.275	1490.1	3915.2
451.75	1378.86	3540.31
339.231	1451.47	2786
324.6	1323.33	3543.47
384	1689.58	3013.5
363	1341	2729
354	1446.3	2878.2
328	1336.33	3034
330.555	1790.44	2787.5
383.188	1393.22	3350.6
383.348	1529.71	2816.08
373.055	1259	2897.8
333	1292.8	2856
567.836	1298.75	2799.33
332.333	1317.14	3998.62
327.5	1389.25	4259.83
516.833	1310.73	2733
355.846	1315.33	2774.33
343.889	1244	2783
522.46	1382.62	2824.4
321.667	1566.55	2880.95
389.762	1355.92	2813.67
414.769	1378.12	2908.88
325	1293.22	4035.63
324.2	1322.67	3521.24
467.512	1522.76	3376.52
390.559	1325.44	3046.94
319.75	1644.2	2959.71
336.75	1293	2758
329.25	1787.45	4046.89
320	1284.5	3377.55
332.833	1275.25	2805.5
330.455	1414.08	3789.97
331	1313.33	2878.5
358.786	1350.5	3878.62
353.935	1249	2983.09
471.854	1694.61	2734
564.495	1919.68	2770
348.143	1466.62	3252.62
329.2	1559.5	2747
317	2293.39	4737.25
320.8	1596.8	2788.17
369.083	1348.43	3020.33
324.5	1307.62	3668.31
365.083	1866.37	2827.5
322	1556.08	3756.87
325	1333.86	3072.91
316	1622.08	3636.39
404.762	1325.89	2803
316	1807.79	3773.75
421.676	1247	3273.47
487.083	1266	3183
381.174	1380.33	3844.86
408.143	1248	3117.67
407.567	1654.12	2850
360.455	1295	4514.48
339	1327.75	2779
389.667	1571.53	3185.35
332.167	1352.44	3709.92
332.25	1523.59	2826.5
344.154	1633.56	2952.57
472.212	1378.33	3042.55
368.278	1505.93	3406.45
321	1247.5	2970
322.6	1407.33	3266.85
335.625	1460.48	3459.64
370.125	1355.6	3019.5
378.773	1400.93	3967.36
342.786	1400.2	2943.5
338.833	1277.12	3111.3
326	1169	2840.67
447.56	1302.84	2860.6
338	1250.27	2792.5
358.421	1276.86	3339.85
361.857	1416.14	4146.3
367.417	1488.86	3166.09
343.818	1159.5	3044.12
352.136	1196.8	2747
317	2092.3	2873
486.688	1345.25	2873.33
398.042	1175	3140.14
407.607	1607.21	3388.38
321.5	1167	3444.44
363.714	1311.67	4550.95
393.609	1418.92	3411.18
379.222	1198.5	2887
338.25	1252.1	2927
342.1	1455.54	2825
362.576	1207	2976
390.357	1342.97	3340.53
352.667	1418.82	3099.22
352.222	1172.67	3297.56
630.788	1182	5195.54
624.201	1184	2969.33
323.667	1151	2966.6
373.367	1552.24	2978.67
458.37	1394.62	3476.68
332.25	1306.73	3277.22
373	1189	2831
460.849	1171.33	5137.32
356	1481.66	3492.22
324.333	1313.91	3131
367.154	1932.69	3169.79
319	1213	2890.75
412.538	1178.5	3495.25
324	1551.65	3017.8
397.967	1324.36	3110.25
320	1454.39	2856
382.727	1238.7	3006.89
341.625	1230.5	3360.36
536.809	1308.57	3477.17
484.63	1216.4	4763.16
322.571	1447.33	3853.07
424.021	1396	3136.54
322.4	1314.31	3724.2
355.969	1202.43	3399.08
341.571	1220.1	4334.68
383.45	1163	3011
464.427	1894.05	3067.88
569.075	1289.82	4228.65
347.75	1474.14	2852.5
391.794	1308.38	3108.33
509.544	1253.2	2857
344.667	1156	3166.29
320	1428.69	2898
317.5	1274.12	4553.67
355.067	1147	2857.5
394.286	1167.25	3510.31
319.5	1813.55	4252.54
325.5	1176.8	2969.75
323.5	1541.86	3064.75
357	1416.94	4363.5
386.518	1191	2892
343	1267.25	2874.5
345.379	1276.7	3110.36
329	1348.29	3448.83
346.917	1188.44	2980.4
504.4	1432.93	3248.72
336	1229.7	2956
337.286	1174	4076.49
516.345	1615.89	3767.97
335.667	1178	4066.54
357.867	1451.44	4317.63
389.342	1222	3426.09
402.75	1182.33	3263.8
330	1224.69	3015.5
317	1303.07	3315.33
319	1162	3646.37
463.5	1292.67	2979
449.932	1163	4868.26
330	1601.64	3912.54
334.667	1291.08	2855.5
434.387	1513.37	3660.57
337.6	1210.8	2874
348	1456.86	2933.67
432.333	1162	2904.25
315	1389.06	3522.16
431.231	1188	2868
353.593	1173	2989
1669.08	1425.67	3098.75
390.833	1207	3360.23
731.679	1956	3387.51
406.583	1231.67	2976.4
337.455	1816.48	4663.68
315	1636.25	3331.92
327.5	1228.1	6137.75
416.504	1460.42	4171.11
335.714	1351.42	2893.33
454.197	1234.92	3993
348.75	1147	2821
382.175	1278.58	4485.78
505.364	1145	2907.17
364.667	1584.76	3026.83
367.095	1627.73	3191.85
417.006	1257.45	3776.71
429.472	1251.33	3007.83
320	1172.62	3094.9
411.038	1293.55	4840.21
425.812	1658.77	3506.05
334	1320.5	5058.41
319	1258.71	2912
436.928	1152.5	3801.35
319	1545.05	3226.94
363.857	1259.43	6902.08
400.407	1171.5	3005.8
455.086	1229	2869.5
343.467	1904.74	2817
367.316	1586.14	2875.4
317	1669.29	3255.06
340	1218	2978.4
461	1282.88	2926.5
344.946	1239.56	3931.17
329.8	1569.77	3254.15
430.435	1153	3126.29
360.267	1216	3001.94
341.333	1392.67	2880.6
383.312	1179.45	3040
376.784	1596.12	3036.6
460.457	1314.52	3078.88
394.03	1241.2	3586.44
834.812	1162	4701.05
335.385	1258.08	4202.89
323	1233.67	4196.67
335.25	1505.33	3872.48
317.5	1447.67	2926
423.382	1269	3171.81
348.6	1208.7	3948.7
362.733	1351.07	5626.46
315	2065.14	3659.8
343.565	1540.89	2857.33
327.6	1366.32	5218.37
316	2408.43	4683.55
348.167	1212.2	3060.62
333.5	1207.2	4395.85
315.5	1159.33	3876.16
318	1270.64	3183.57
468.154	1206	3048.5
346.583	1275.55	2965.75
356.719	1323.46	3827.48
347.6	1326.74	3124.71
386.425	1233	3297.59
341.385	1171	7270.95
355.555	1343.55	3554.56
345.375	1414.6	4864.17
368.412	1456.24	5494.72
363.442	1180.75	3801.82
330.333	1221.25	3773.54
317	1410.12	2877
342.667	1377.35	5222.91
354.467	1401.35	2965.4
324.5	1443.3	3528.43
392.333	1183.25	3273.89
421.903	1502.63	5653.4
435.746	1261.24	3936.91
321	1203	4762.36
342.667	1140	3680.64
376.3	1233.12	3255.9
476.117	1309.07	3665.14
381.75	1168	3864.98
352.474	1458.25	3477.92
321	1214.5	2983.67
344.9	1424	3775.72
390.217	1141	2879.2
464.98	1141	2886.4
341.385	1352.62	2332.06
448.455	1194.4	2887.34
326	1268.82	2275.75
447.923	1210	2356.32
344.167	1407.5	2156
331	1159	2457.67
448.032	1145.5	4174.57
319.2	1671.37	2118
325.286	1178.4	2272.74
323.5	2147.12	2215.83
412.193	1187.5	2139
381.839	1528.18	2190.71
425.12	1657.41	3303.57
325.286	1171.8	2837.18
490.676	1400.35	2388
402.226	1233.21	3243.63
415.519	1189.5	2363.62
344	1293	2188.25
435.109	1464.43	2194.5
332.5	1603	2154.33
319	1249.26	2275
359.182	1559.65	2727.83
485.204	1577.41	2457.82
367.292	1735.48	2227.86
366.471	1166	2155.5
326	1244.33	2129.33
410.333	1164.67	2664.74
402.667	1778.55	2182.8
402.667	1306.5	2653.38
393.3	1298.39	2142
424.154	1275.82	2476.44
410.815	1387.74	2252.17
383.5	1175.33	2271.8
385	1629.96	2498.71
387	1260	2869.18
475.169	1478.25	2443
454.647	1554.5	2477.42
453.8	1316.64	2141.5
1084.12	1247.14	2352.67
404.684	1203	2592.53
398	1711.85	2331
568.81	1177.75	2167.5
433.555	1331.16	2202.25
473.088	1163	2232.17
399.6	1261.75	2715.54
429	1797.13	2252.38
512	1189.27	2135
729.489	1197.67	2250.57
464.667	1157	2431.33
475.273	1372.44	3979.76
581.585	1296.31	2257.12
378	1164.5	2289.37
564.107	1158	2165
420.333	1192	2599.58
484.755	1172.4	2126
424.5	1185.33	2273.25
386	1305.43	2231.2
390	1316.53	2188
392	1294.57	2241.43
463.792	1514.72	2435.32
426.6	1347.62	2144.4
577.914	1166	2346
407.784	1158	2221.5
582.865	2031.62	2221.5
432.125	1458.48	2310
619.577	1168	2653.55
396.231	1434.74	2365.45
387.4	1243.71	2943.2
458.227	1270.64	2268
659.385	1489.68	2363.62
471.062	1288.22	2542.44
394	1811.66	2391.2
413	1310.62	2819.94
430.455	1284.45	2283.33
387.875	1237.33	2160
393.667	1504.35	2430.16
395.2	1272.62	3319.29
390.143	1211.8	2116
574.769	1794.81	3144.17
405.182	1440.68	2200.57
382.667	1251.29	2169.5
457.421	1336.39	2115
469.726	1259.26	2199.75
402.035	1223.25	2289.9
402	1256.2	2195.25
382	1461.61	2328.14
426.909	1287.8	3342.46
387.4	1205.5	2223.5
385.667	1231.88	2258.86
459.771	1750.92	2218.14
394.75	1219	2275.27
419.667	1228.22	2274.62
417.846	1457.36	2399.91
439.245	1499.35	2433.39
423.467	1280.92	2159
479.932	1334.48	2246
539.13	1360.82	2230.17
878.047	1272.43	2241.08
398.5	1223	2194.5
401.125	1236.29	2115
401.714	1210.2	2469.37
390.75	1753.54	2281.33
423.529	1219.25	2169
564.517	1232.43	2140
401.6	1375.42	2342.92
397.286	1717.5	2287.83
552.593	1746.87	2178.33
408.59	1264.67	2326.2
425.5	1269.2	2120
460.842	1331.37	2332.1
395.667	1207	2269.12
487.455	1203	2202
517.952	1204	2195.8
378	1263.17	2394.8
439.393	1229.67	2395.17
393.375	1231	2562.93
555.615	1298.07	2289.92
521.484	1445	3151.22
669.038	1378.18	2256.55
497.214	1224.62	2191.25
385.667	1291.31	2878.4
388	1362.25	3254
455.31	1658.45	2139
384	1258.55	2155.33
399.692	1470.77	2228.8
510.615	1254.89	2400.69
405.4	1234.25	2648.1
458.833	1265.9	2560.63
464.419	1219	2157
428.474	1236.25	2343.27
531.536	1279.48	2318.62
396.286	1211.5	2140
414.333	1424.77	2128
394.25	1483.99	2585.3
517.844	1234.5	4695.64
505.757	1332.04	2273.43
402.375	1424.62	2147
444.15	1210	2133
450.875	1240	2300.61
383	1424.9	2187.5
499.793	1399.5	2437.72
414.222	1329.17	4057.62
380	1244.5	2253.62
528.489	1487.89	2597.68
465.25	1244.18	2161.6
432.182	1241	2994.28
384.667	1212.88	2177
498.724	1220	2584.3
470.5	1237.62	2603.06
418	1956.87	3012.99
586.072	1226.4	2453.59
431.2	1287.23	2178.71
492.873	1360.07	2214.86
475.041	1528.92	2271.04
386.667	1653.19	2160.25
483.7	1210.67	2134.5
450.575	1352.07	2162
378	1419.4	2718.04
454.667	1253.12	2358.45
403.571	1289.16	2235.68
379	1393.72	2205.58
398.5	1204.33	2176.17
429.071	1374.44	2607.11
438.067	1256.75	2419.61
725.451	1448.56	2516.23
405.25	1217	2148
504.481	1248.36	2412.6
569.295	1202	2159.67
956.094	1237	2341.75
409.286	1200.75	2225.57
442.609	1538.88	2186
432.533	1705.97	2216.36
396.833	1381	2258.33
542.491	1542	2177
506.211	1379	2260.87
466.875	1731.63	2641.68
443	1815.31	3127.15
467.833	2326.76	2206.43
525.976	2789.31	2135
433	2542.93	2476.43
459	1375	2340.04
461.927	1465.67	2146
380	1568.38	2318.89
407.667	1411.25	2202.29
547.957	1691.93	2185.33
382	1908.01	2139
497.75	1438	2405.19
762.193	1510.86	2724.63
381.5	2215.37	2368.53
378	1649.56	2286.17
418.846	1453.82	2652.31
442.414	1723.68	2466.7
380	1493.38	2120
431.458	1555.89	2724.33
501.324	1586.55	3430.83
412.6	1889.27	2142.5
572.722	1942.39	3002.07
407.4	1516.92	2358.42
771.068	1754.68	2163
475.083	2050.85	2216.73
419.833	1561.92	2707.39
418.15	1399	2331
428.75	1580.77	2885.41
413.7	1488.36	2275.68
425.857	2207.92	2190.5
780.809	1449.67	2298.22
509.308	1525.53	2296.33
443.4	1618.64	2165.33
670.258	2419.73	2367.55
523.574	1514.8	2325.69
379	1402.6	2297.81
378	1548.39	2116.5
380	1428	2245.26
767.117	1390.33	3996.27
460.32	1446.71	2436.55
489.185	1437.22	2528.29
695.426	1692.91	2207.5
464.307	1552.52	2297.31
616.56	2113.73	2459.07
473.414	1747.74	2777.56
494.82	1706.13	2202.43
463.098	1411	2185.5
387	1478.71	2471
405.917	2680.3	2455.31
380.5	1636.44	2353.8
386.333	1406.8	2346.2
403.5	1833.31	2291.33
744.383	1512.31	3073.42
470.842	1733.54	2166.67
401.5	1470.2	2159
609.357	1534.95	2495.49
473.28	1440.11	2610.7
421.75	1461.75	2287.75
449.533	1622.78	2148
489.651	1457.27	2174
655.192	1792.23	2373.62
524.304	1402.5	2231.12
399.9	1911.31	2236.17
379	1404.8	2472.4
386.25	1688.44	3472
521.717	1476	2554.59
564.65	1565.53	4095.31
913.7	1432.56	2453.93
396.25	2884.19	2336.62
387.636	1557.02	2158
452.583	2448.27	2553.48
559.667	1413.33	2277.43
411.571	1663.06	2207.11
380	1375	2817.22
386.429	1403	3115.54
406.2	1785.09	2129.5
473.368	1595.42	2510.79
391	1429	2132
353.9	1402.33	2427.64
353.9	1509.05	2161.67
348.632	1379	2630.57
343.122	1409	2217
348.396	2099.02	2744.49
310	1394.2	2328.81
372.278	2148.27	2228.12
384.625	1427	2242.91
332.708	1460	2229.29
330.75	1542.89	2185.57
377.472	1460	2639.08
326.2	1398.5	2312.2
309.75	1665.72	2231.14
313	1479.29	2337.32
359.907	2080.79	3443.05
321.555	1492.56	2363.2
460.769	1459	2809.58
333.5	1380	2214.8
321	1375	2121
322.5	2172.18	2262.93
407.438	1764.56	2199.5
310	1779.8	2485.94
311	1516.7	2324.85
314.667	1391	2950
395.215	1504.82	2193
365.926	1978.55	2543.72
311.333	1488	2180.25
303.5	1640.64	2122
316.353	1505.79	2129
318.667	1721.45	2230
325.909	1595	2139
318.368	2056.04	2181.91
335.643	1653.29	2393.23
333.471	1483.59	2330.5
352.24	1782.94	2477.54
328.4	2122.61	3552.92
342.41	1453	2126
331.445	1376	2160.67
357.71	1742.51	3230.05
323.111	2604.67	2595
354.949	1769.47	2489.89
378.536	1740.03	2297.94
339.967	1523.58	3226.24
355.55	1668.39	2177.33
393.99	1742.65	3916.62
343.105	1834.11	3590.73
322.1	1418.71	3236.04
350.692	1508.32	2984.15
326.1	1961.79	2675.6
310.25	1534	2384.86
315.765	2645.55	2311.08
346.6	2135.89	2454.9
306.5	2601.15	2205
349.434	1704.95	2209.75
369.389	1380	2185.25
376	1431.69	2738.1
355.322	1409	3936.4
369.484	1472.67	2348.36
322.445	1735.17	4580.44
428.557	1506.18	2401.29
475.822	1408	2176
336	1385	2180.83
347.2	1378.36	2140
334.765	1094.33	3166.48
309.2	1249.73	2300.77
413.919	1198.86	2546.07
313.75	1079	2212.5
334.923	1144.67	2193
324.545	1084	2186.5
310	1098	2547.65
390.634	1185	2327.17
317	1089.5	3472.55
342.29	1407.48	2402.91
341.727	1121.64	2475.1
310.333	1128.62	2427.26
346.471	1177.66	2526.19
403.643	1145.94	2304.73
358.03	1308.09	2692
304	1117.94	2282.83
323.167	1247.29	2254.33
333.286	1093	2360.17
305.5	1158.22	2861.76
447.175	1120	2236.25
333.8	1125.18	2197
337.538	1980.61	2501.43
328.8	1166.25	2364.58
305	1105	2178
304	1335.16	2267.75
305.5	1222.06	2217.33
396.508	1232.41	2175
344.445	1205.35	2596.8
351.643	1104.67	2270
439.758	1105	2696.63
326.25	1357.52	2927.52
383.129	1081.5	2464.5
387.462	1722.69	2195
347.804	1139.2	2244
437.4	1474.26	2651.9
308.5	1097	2261.12
309.5	1093	2875.09
312	1093.75	2211.75
359.538	1262.41	2609.81
341.2	1245.64	2415.49
351.926	1431.3	2866.55
350.818	1187	2360
345.872	1178.68	2649.81
316	1291.42	2217.67
386.488	1385	2244
324.222	1189.96	2166
323.167	1100	2301
308.4	1137.9	2232
391.129	1108.71	2243.14
311.333	1721.51	2917.2
337.5	1094.33	2575.99
438.778	1105.9	2818.65
337	1124.58	2515.04
366.792	1300.08	2359.82
386.792	1091	2170.5
375.037	1337.49	2166
308.333	1103.29	2396.67
424.167	1352	2407.4
350.762	1300.75	2317.55
341.571	1409	2546.62
356.867	1180.81	2192
421.196	1192.23	2310.58
324.889	1313.65	2240.67
334.065	1239.21	2206.5
316.333	1133.6	2395.6
314.667	1811.28	2309.6
330.417	1971.07	2211.5
320.75	1586.54	2555.81
413.651	1406.85	2560.12
622.423	1139.53	2227.2
390.12	1105.18	2245.83
335.588	1105.35	2448.04
322.6	1104.4	2228.5
304.5	1123	2436
310.429	1322.09	2305.75
303	1190.9	3763.87
316.8	1106.67	2452.39
312	1330.35	2478.39
308.5	1132.91	2583.26
316.5	1151.14	2633.77
311.429	1410.72	3226.94
420.113	1697.1	2293
356	1110	2327.54
355.945	1225.25	2217
338.945	1391.33	3469.79
354.818	1101	2545.11
377.241	1215.83	2428.95
333.5	1083.25	2647.35
354.562	1170.64	2323.92
363.905	1310.23	2199.5
438.111	1168.82	2273
304	1136.78	2430.64
331.667	1106.09	2441.6
323.375	1330.83	2301.2
429.251	1126.33	2734.49
326.154	1308.39	2424.67
395.067	1087.5	2274
346.8	1771.42	2625.2
316.727	1179.32	2311.33
317.97	1466.97	2298
315.143	1208.56	2189
359.7	1295.17	2482.29
341.565	1495.64	2188.33
357.423	1187.85	2231.33
454.726	1248.9	2793.94
384.95	1137.08	2343.24
396.059	1524.81	2397.44
322.231	1098	2305.12
351.833	1098	2358
321.727	2257.42	2253.17
305.5	1116.17	2299.25
324.143	1120.33	2901.46
351.222	1172.52	2642.87
308	1095.4	2222.67
388.488	1138.2	2439.73
321.5	1084	2533.14
306	1370	4021.49
420.761	1093.4	2240
387.193	1270.42	2588.33
386.905	1535.48	3824.09
388.493	1090	2181
371.265	1370.17	2261.12
372.818	1261.18	2435.96
311	1079	2219.75
304	1106.4	3165.47
328.5	1229.83	2529.52
319.6	1198.41	2457.83
403.887	1569.58	2247.33
320.714	1116.44	3100.82
437.514	1250.79	2250.5
370.143	2000.12	2185
326.649	1327.2	2210.25
326.143	2198.7	2787.91
313	1170.64	2254.33
362.055	1130.33	2947.59
321.929	1863.37	2326.75
327.12	1357.67	2182
331.059	1444.94	2214
385.35	1123.5	2248.83
305	1428.58	2372.5
320.462	1084.5	2786.6
333.25	1202.88	2175
	1215.83	2920.25
	1130.88	2177
	1696.48	2529.97
	1165.92	2306.45
	1132.12	2341.75
	1120	2203.8
	1181	3550.35
	1429.89	2208.33
	1392.06	2244.83
	1100	2220
	1502.6	2968.24
	1519.04	2222.5
	1547.68	2846.69
	1498.08	2219.75
	1116.8	2215
	1573.69	2482.05
	1103.43	2293.89
	1124.54	2193.75
	1382.93	3107.8
	1124.86	2280.64
	1082	2578.04
	1215.04	2673.07
	1172.69	2169
	1091	2190.33
	1154.71	2211.67
	1543.66	2316.46
	1091	2598.3
	1227.18	2422.95
	1149.47	2405.45
	1416.69	2570.08
	3712.68	2882.24
	2467.09	2326.12
	2208.5	2690.54
	3020.39	2196
	2403.4	2570.11
	2465.02	3179.19
	2991.96	2672.21
	2764.8	2285.67
	2419.92	2183.5
	2675.21	2169
	2432.22	2475.26
	2235	2246
	2210.5	2854.52
	3498.3	2620.12
	2324	2581.04
	2782.56	2239
	2318.27	2198.5
	2670.34	2324.43
	2265.75	2434.2
	2470.41	2503.52
	3198.49	2311.09
	2254.67	2620.63
	2697.58	3366.55
	2292.71	2224.29
	2244.67	2273.57
	2614.86	2593.95
	2342.3	2255.5
	2312.29	3019.05
	2804.77	2436.8
	2251.22	2293.17
	2436.26	2388.64
	2223	2694.79
	3084.8	2316.43
	2361.55	2208
	2432.44	2201.75
	2233	2610.3
	3136.51	2404.37
	2374.82	2304.75
	2220	2198.5
	2841.54	2193
	2572.17	2361.3
	2695.5	2324.6
	2439.36	3806.7
	2259.33	2333.9
	2237.33	3275.87
	2296.71	2443.22
	2519	5239.68
	2251	2112
	2527.56	2339.67
	2314.62	2484.61
	2303.75	3413.21
	2227.2	2095
	2266.92	3843.5
	2267.5	2435
	2803.39	2308.89
	2566.95	2314.33
	2299.88	2259.46
	2271.25	2128.75
	2290.71	2238.44
	2540.53	2112
	2667.88	2983.18
	2461.37	2468.43
	2272.6	3084.93
	2295.33	2271.22
	3999.6	2582.5
	2651.06	2144.4
	2270.25	2309.33
	2990.71	2177.19
	2212.5	2111.75
	2327	2463.14
	2507.44	2219.17
	2462.05	2250.83
	2662.85	2433.56
	2276	2866.21
	2355.03	2386.35
	2913.88	2958.35
	2723.3	2385.86
	4470.67	2245.25
	3106.21	3067.59
	2745.48	2163.62
	2519.73	2745.22
	2307.17	2241.78
	2257.86	2207.38
	2671.56	2306.85
	2632.22	2258.6
	2324.91	2410.78
	2612.93	2135
	3059.56	2448.43
	2231.25	3206
	2220	2239.14
	2240	2238.25
	2539	2641.08
	2260.67	2601.46
	2447.23	2221.43
	2931.09	2155.6
	2470.37	2532.03
	2271.8	3006.39
	2342.2	2277.75
	2218.5	2203
	2922.49	2747.28
	2940.39	2176.71
	2383.74	2461.67
	2255	2866.42
	2249.5	3701.23
	2326.11	2516.48
	2533.26	2140.83
	3982.21	3038.1
	2425.71	3055.3
	2265.89	2097
	2810	2616.24
	2395.05	2191.21
	2498.26	2155.25
	3355.29	2302.57
	2427.1	2415.94
	2431.54	3059.62
	2685.18	2836.01
	2780.94	2113
	2397.73	3386.02
	2466.19	2150.25
	2348	2102
	2235.6	2409.43
	2354.39	2184
	2644.32	2104
	2926.99	2323.27
	2737.48	2124
	2516.94	2314.22
	2299.33	2094
	2227.67	2218.33
	2355.33	2575.61
	2657.29	2174.29
	2394.33	2670.85
	2298.83	2118.5
	2205.5	2212.04
	2834.56	2153.67
	2414.5	3384.05
	2363.71	2163.2
	2507.36	2160.67
	2321	4259.38
	2310.92	2432.57
	2233.56	2091.5
	2495.43	2219.2
	2274.44	3261.16
	2422.29	2127.33
	2205	3025.84
	2226.5	2121.25
	3128.92	2145.33
	2326.44	2276.77
	2393.5	2149.25
	2608.97	2327.79
	2310.6	2081
	2842.76	2381.2
	2340.41	2348.39
	2640.44	2221.07
	2427.53	3180.1
	2314	2075
	2995.04	2642.38
	2693.43	2300.64
	2448.91	2288.93
	2268.2	2635.56
	2591.82	2921.11
	2268.17	2251.24
	2582	2396.65
	2199	2235
	2206	2100.5
	2478.27	2281.31
	2266.6	2104.5
	2552.25	2320.09
	2243.25	2354.42
	2317	2185
	2322.45	2087
	2513.86	2164
	2561.83	2298.04
	2276	2218.33
	2337.56	2079.5
	2296.6	2190
	2320.75	2134.67
	3145.1	2163
	2914.56	2457.92
	2306.8	2159
	2978.21	2157.86
	2311	2377.86
	2360.75	2138.71
	2371.75	2116
	2339.36	2185.75
	2356.83	2421.09
	2216	2569.14
	2451.78	2279.38
	2198.33	2146.2
	2195.5	2105.75
	2282	2147
	2477.53	2887.79
	2236.33	2380.04
	2459.87	2389.22
	2379.45	2110
	2498.69	2244.09
	2245	2110.67
	2343.73	2100
	2271.75	2072
	2598.44	2167.44
	2280.86	1452.43
	2737.34	1594.65
	2318.64	1578.82
	2307.85	1513.67
	2634.16	1416.67
	2484.72	1694.69
	2566.47	1564.3
	2308	1643.6
	2233.67	1522.31
	2725.64	1592.81
	2279	1401
	2234.38	1459.43
	2268	1460.62
	2333	1457.67
	2475.23	1511.55
	2238	1425.67
	2324.72	1482.85
	2331.13	1610.96
	2246.67	1493
	2266.22	1746.25
	2655.87	1405.25
	2550.43	1518.64
	2652.14	1420.39
	2238.43	1851.2
	2261.89	1496.58
	2303.4	1432.36
	2226	1613.75
	2262.12	1486.18
	2245.8	1592.18
	2209	1585.08
	2302.14	1410.4
	2307.27	1723.06
	2421.75	2248.62
	2453.2	1411
	2224	1470
	2270.5	1727.73
	2516	1438.25
	2286.83	1578.23
	2208	1446
	2623.35	1496.5
	2194	1401
	2270.6	1573.04
	2285.67	1475.7
	2377.27	2189
	2456.63	1409
	2297.38	1520.81
	2256	1651.46
	2223	1603.65
	2194	1445.56
	2186	1561.71
	2294.22	1735.78
	2369.82	1652.11
	2274	1624.59
	2219.33	1849.34
	2357.22	1497.55
	2201.25	1490.83
	2333.27	1392
	2885.5	1761.87
	3478.37	1498.94
	2335.67	1487.38
	2260.22	1477.9
	2323.67	1522.97
	2278.2	1447.1
	2828.21	1711.66
	2761.09	1507.53
	3665.26	1704.76
	2635.58	1637.27
	2394.33	1438
	2543.79	1984.37
	3140.88	1644.96
	2407.84	1584.16
	2241.25	1479
	2379.33	1489.25
	2220.57	1563.96
	4239.97	1428.89
	2644.88	1433
	2621.23	1575.56
	2613.14	1602.91
	2291.5	1881.84
	2370.63	1513.07
	2214	1420.17
	2236	1529.86
	2339.64	1621.27
	2335.4	1570.24
	2275	1447.1
	2253.5	1544.33
	2483.5	1489.29
	2220	1495.09
	2269.38	1763.21
	2443	1457.6
	2879.77	1481.77
	2192	1620.15
	2300	1419
	2440.67	1483
	2415.12	1765.92
	2221	2036.74
	2203	1641.63
	2550.8	1599.19
	1694.33	1512.47
	1662.73	1459
	3331	2385.26
	2119.88	2311.88
	1705.61	1943.98
	1542	1743.75
	1575.75	1529.29
	1558	1595.62
	1957.17	1485.08
	1733.59	1456.92
	1543	1449.33
	1648.67	1436.25
	1705.38	1437.43
	1871.38	1480
	1623.46	1558.97
	1600.12	1682.2
	1536.5	1408
	2194.76	1466.5
	1551	1839.8
	1764.75	2919.8
	1676.75	1402
	1749.83	1489.21
	1590	1664.52
	2178.61	1491.9
	1642.64	1442.86
[truncated: 609 more rows]
