# Supplementary material for: Structural organization and dynamics of FCHo2 docking on membranes
Source: eLife. 2022 Jan 19;11:e73156. doi: 10.7554/eLife.73156 (PMC8798043; doi:10.7554/eLife.73156)
Supplement: Figure 2—figure supplement 1—source data 1. [file elife-73156-fig2-figsupp1-data1.xlsx]

## Sheet: Feuil1
Energy	Cytosol
1881.08	2500.46
1605.43	2606.3
2154.54	1313.22
2090.49	3554.03
1765.38	1724.22
1698.97	1552.62
3137.24	1878.73
1752.3	1421.65
1676.35	2113.51
1524.81	2370.41
3182.08	1854.97
2860.54	1812.27
2280.32	3165.11
2115.86	3896.32
2002.54	1556.68
1805.13	1583.46
1839.35	1452.57
1658.4	1390.08
1500.03	1426.78
1460.54	1940.05
2621.49	1687.11
2158.08	1359
2385.14	1473.22
2038.27	3022.27
1914.08	4420.54
1871.62	1419.46
1959.78	2469.11
1646.81	2409.16
1606.19	1452.78
1550.27	2100.35
1605.97	5031
1502.11	1438.65
2856.97	1547.16
1887.95	3171.68
1476.68	2753.32
2476.03	2076.43
2173.24	1368.51
1591.24	1579.6
6145.35	2941.86
3255.81	1558.92
2214.86	1726.35
2197.89	1444.46
1973.78	1423.78
1941.81	1539.54
1829.24	1306.76
1806.35	2408.84
1779.3	4529.78
1701.81	1493.24
1683.65	2367.59
1641.05	2820.73
1623.49	2243.95
1618.03	5091.78
1664.95	2357.38
1392.81	1659
3197.78	1872.76
2605.41	1962.4
2471.84	1769.24
2047.92	1511.51
1740.76	1560.13
1762.46	1974.38
1746.62	2439.19
1639.3	1351
1565.43	1860.54
1423.4	2284.84
1440.97	3189.24
1381.73	2082.03
	1487.13
	2822.05
	4426.97
	5724.92
	1552.62
	3846.11
	1355.57
	1959.84
	3661.41
	2171.43
	1871.65
	1477.68
	2438.3
	4172.54
	1693.62
	2564.11
	4390.14
	1656.81
	1739.35
	1960.13
	2797.11
	3828.05
	3368.16
	2385.97
	1612.49
	1582.87
	3027.51
	4490.19
	2148.68
	2162.08
	2211.27
	1575.78
	1393.27
	1623.78
	1461.27
	5022.24
	1316.73
	1754.19
	2008.3
	1461.4
	3236.73
	2240.97
	1906.57
	3643.84
	1450.32
	1377.76
	1612.78
	1790.6
	1403.68
	1325.24
	1752.54
	1952.16
	1293.62
	1288.78
	1366.27
	1980.03
	1759.57
	2383.57
	4096.46
	1351.27
	1679.73
	1367.89
	2202.51
	2611.95
	4629.92
	1496.57
	2646.11
	3591.03
	3288.7
	2104.65
	1681.24
	2595.68
	2488.03
	6569.22
	2521.57
	1680.49
	1783.62
	3578.81
	2648.59
	1441.57
	1507
	3470.89
	2212.3
	2367.3
	1471.4
	1359.43
	2560.57
	1771.05
	3320.49
	8631.05
	1411.49
	1906.57
	1934.7
	1818.43
	2115.03
	1651.22
	1797.92
	1326.65
	3909.59
	2881.62
	2148.11
	1770.57
	5200.05
	1596.84
	7907.65
	1975.97
	1518.97
	2292.97
	3255.11
	1501.13
	2462.54
	3057.62
	2739.3
	1429.81
	2261.24
	1599.16
	2391.76
	2154.51
	2484.35
	2217.27
	1372.97
	1407
	1800
	1537.4
	1299.46
	1934.78
	2557.03
	1614.81
	1325.13
	2338.7
	3592.38
	1944.65
	2413.22
	1638.62
	2014.76
	1621.08
	1374.81
	1373.54
	1707.08
	2927
	4471.38
	1576.95
	4242.95
	2021.95
	1725.05
	5065.73
	1415.32
	1541.87
	3088.57
	2349.16
	2214.05
	2094.59
	2834.08
	2534.97
	1763.51
	2136.95
	1365.46
	2045.65
	1377.46
	1791.43
	4295.08
	1378.54
	1996.27
	1462.08
	1541.97
	1323.27
	1559.87
	2355.89
	1448.84
	2320.78
	1676.08
	1977.54
	1639.27
	3678.97
	2206.41
	1819.51
	2258.41
	2999.57
	2287.03
	5117.08
	1536.43
	1687.97
	1619.81
	2154.24
	1397.35
	1352.16
	1497.76
	1533.49
	2321.05
	1791.32
	1649.65
	7781.7
	3978.43
	2616
	1422.27
	2348.35
	1893.51
	3054.92
	1372.16
	1530.87
	5021.84
	1535.51
	1532.87
	3441.84
	4854.14
	4201.51
	2991.84
	4918.46
	1692.11
	1792.05
	1702.7
	2055.43
	1798.97
	1862.05
	1835.3
	1286.6
	3787
	1413.43
	1507.95
	1497.81
	2977.3
	1699.3
	2022.43
	3302.57
	1546.22
	1383.65
	1385.89
	2942.54
	1403.7
	1497.51
	3315.81
	1384.08
	1749.16
	5642.32
	2363.38
	3258.16
	2661.7
	3037.57
	2055.76
	1412.95
	1492.3
	1425.24
	1935.6
	1624.49
	1621.68
	1849.57
	1528.03
	4039.92
	1425.16
	1633.13
	1906.32
	1771.46
	1384.46
	2609.76
	1883.73
	1536.03
	2041.46
	3970.86
	1950.35
	1539.62
	2790.68
	1424.43
	1574.13
	3211.84
	5490.86
	1717.62
	2924.92
	1501.87
	6869.4
	1590
	2381.86
	1581.49
	6156.7
	3974.95
	1495.43
	2465.57
	1584.19
	1619.19
	2591.68
	1603.84
	2720.32
	3605.89
	1809.27
	1461.57
	2703.19
	3330.7
	1618.27
	1511.62
	1561.76
	2930.11
	4452.7
	2649.38
	2560.3
	3736.57
	3354.7
	2099
	2134.41
	1329
	2074.81
	1888.51
	1373.24
	2488.92
	3983.32
	1644.22
	3420.3
	1791.89
	3477.57
	1384.97
	1942.87
	2396.08
	2312.97
	2275.92
	6781.89
	2149.11
	1701.57
	2404.62
	1528.16
	2271.32
	1500.62
	2304.03
	1927.16
	2924.76
	3138.41
	3417.59
	1610.6
	2435.41
	1714.13
	2754.24
	2478.14
	2221.03
	2878.62
	1452.05
	2281.32
	2119.14
	1466.11
	2298.03
	1673.78
	1520.05
	1363.4
	2332.41
	3607.41
	1822.76
	3301.16
	2997.54
	2172.46
	1383.78
	1543.3
	4222.76
	2926.95
	1461.97
	2269.62
	1643.38
	3036.03
	1567.81
	1498.05
	1866.4
	1472.89
	2109.57
	1372.81
	1493.89
	1637.4
	2879.32
	2064.95
	1899.08
	1508.97
	1711.19
	4152.24
	1802.81
	1510.11
	1264.95
	1619.57
	1544.97
	1661.13
	5327.6
	1341.35
	1843.03
	1589.4
	2735.73
	1650
	2260.24
	2628.65
	1890.4
	2828.89
	1838.3
	1814.32
	2311.32
	1702.38
	2106.76
	4334.19
	1570.78
	1786.43
	1844
	2288.41
	4719.84
	1468.6
	3034.54
	3498.76
	1655
	5011.49
	1530.54
	1944.95
	1753.7
	2291.95
	1822.87
	2063.57
	2059.54
	1434.65
	1399.51
	3071
	1647.19
	2899.81
	4229.65
	1484.51
	1415.43
	1654.57
	1515.38
	1477.87
	2865.11
	3776.62
	1373.08
	4076.84
	5284.46
	3028.27
	2093.03
	2543.16
	1724.84
	2802.49
	1757.46
	1830.32
	3713.95
	1733.81
	1719.46
	2360.16
	4131.43
	1692.16
	3309.59
	5936.14
	1364.32
	3361.57
	2223.78
	1421.78
	2287.43
	1497.68
	2008.46
	2664.41
	1696.6
	2299.32
	2820.14
	1548.68
	5231.32
	2410.54
	3039.89
	3490.49
	1946.81
	1713.97
	1393.13
	2964.43
	3707.32
	3377.19
	1504.38
	3232.97
	1656.7
	3696
	2883.32
	1660.03
	1821.11
	2627.19
	1803.27
	3094.86
	2703.41
	1338.92
	1848.05
	1732.76
	1613.65
	1559.46
	1666.76
	3026.19
	2391.76
	2173.49
	1864.19
	1650.92
	2359.46
	1399.7
	2416.41
	1491.19
	1556.24
	2601.35
	2175
	2600.43
	3298.32
	4348.11
	1414.35
	1659.11
	1610.6
	1516.19
	1461.24
	3174.65
	1490
	4326.35
	1510.92
	2682.76
	1899.54
	1596.78
	2193.27
	3030.73
	1680.24
	1684.87
	2892.03
	2354.7
	4403.46
	1579.22
	1477.89
	2603.16
	2821.89
	1536.13
	2496.68
	2588.49
	4808.49
	3250.62
	1887.81
	1441.46
	3022.03
	1325.35
	2529.03
	1666.3
	1684.51
	3530.11
	4383.97
	2287.24
	2119.7
	4581.62
	3163.59
	1369.54
	2857.3
	3111.16
	2073.51
	1971.65
	1353.89
	1731.24
	2335.16
	1849.92
	1629.38
	1727.65
	1386.24
	3350.46
	2240.38
	3310.3
	1889.38
	3243.08
	1378.95
	2374.7
	1630.05
	4234.78
	2800.04
	3184.65
	1512
	1657.73
	1669.92
	4401.24
	2174.03
	1364.97
	1865.7
	1831.19
	6497.92
	1567.89
	1801.89
	2662.19
	1480.4
	2253
	5523
	1368.95
	1370.3
	1381.78
	2911.86
	1801.46
	1825.54
	2714.68
	1937
	1977.89
	1489.38
	3438.24
	3897.97
	1506.05
	1520.84
	1532.51
	2088
	1692.57
	3149.49
	2646.3
	1676.84
	2348.65
	1577.57
	2388.32
	2375.57
	1934.7
	1735.7
	6139.14
	1582.65
	1748.65
	1281.65
	1673.13
	2054.38
	1945.46
	1783.11
	2337.38
	2509.35
	4974.35
	4902.32
	1821.84
	2186.65
	2113.14
	2034.97
	1408
	1664.49
	2990.03
	1626.43
	1749.7
	2645.65
	1890.97
	1656
	2431.05
	4730.65
	1502.3
	1754.95
	1736.46
	2251.19
	1857.43
	1450.4
	4376.7
	1812.43
	1762.87
	2474.57
	2333.92
	2952.41
	1686.49
	3845.49
	2343.81
	1867.03
	1789
	1887.51
	1579.62
	1818.13
	6460.86
	1505.65
	1629.3
	2389.68
	4771.57
	2297.35
	1395.32
	1658.43
	1666.19
	2964.32
	1389.62
	5959.11
	1652.51
	1504.68
	1684.03
	1316.81
	1898.03
	2419.73
	1468.78
	1578.13
	4544.27
	1339.6
	1487.6
	2390.86
	2990.38
	1368.19
	1462.95
	1592.68
	3244.05
	1828.27
	2581.03
	1753.38
	2183.35
	1584.78
	1348.57
	1719.05
	1332.51
	2862.22
	2402.3
	1406.76
	2383.76
	1341.97
	1336.81
	3971.76
	3071.38
	1381.97
	1869.49
	3479.57
	1400.13
	3431.05
	1315.73
	3180.57
	1905.05
	1333.3
	5287.43
	4487.16
	3016.51
	1811.57
	2062.89
	5200.35
	1904.16
	1878.3
	1994.81
	4092.11
	2103.54
	5645.68
	4548.24
	2186.86
	1641.03
	1894.46
	2468.92
	1675.35
	1499.27
	3518.19
	1462.08
	1749.24
	1807.05
	1697.38
	2031.84
	1298.11
	1551.38
	5576.16
	1998.4
	1777.95
	2723.65
	1593.16
	1411.84
	1498.95
	3167.35
	2419.97
	2953.95
	5307.57
	4255.08
	1623.3
	3937.7
	2526.86
	2432.78
	4598.19
	1858.43
	6135.43
	3537.22
	2007.46
	1806.13
	3036.22
	1476.35
	1613.92
	2807.95
	3716.22
	2913.35
	1809.19
	2950.32
	1593.76
	3054.92
	1614.68
	1552.19
	1525.87
	3305.49
	2807.73
	1867.3
	1387.13
	2679.16
	3886.62
	3633.05
	3187.92
	1808.08
	2430.68
	3032.49
	1436.46
	1634.54
	5637.46
	4256.43
	1912.81
	1411.6
	1402
	3508.16
	3083.49
	4292.16
	1931.7
	5718
	1779.78
	2742.89
	2770.49
	1522.32
	1505.38
	2111.86
	4128.86
	1353.46
	5049.62
	4372.6
	1363.32
	3290.16
	3523.73
	1498.62
	3841.84
	3273.7
	2789.68
	3416.92
	1957.84
	2703.46
	3479.38
	5663.81
	3539.11
	1428.54
	2035.24
	1518.95
	2502.59
	1483.6
	1394.16
	3104.24
	2362.46
	1451.87
	2354.92
	1360.35
	2036.22
	3294.46
	1805.51
	1634.7
	3106.65
	2040.49
	2135.78
	1386.7
	1446.08
	1655.62
	1785.32
	2832.81
	1938.49
	2810.38
	1924.08
	4770.19
	1582.03
	1589.19
	1348.95
	2307.62
	3479.11
	3177.46
	2269.3
	2141.35
	1588.57
	2487.3
	1792.87
	3319.78
	1919.46
	1395.65
	2052.73
	4065.86
	1623.81
	1472.57
	1977.3
	1656.78
	1592.92
	2158.65
	1684.11
	2385.41
	2035.95
	1836.68
	5540.86
	6059.76
	4392.84
	1581.92
	1359.81
	1478.32
	1306.22
	1979.65
	1550.92
	1919.22
	1954.3
	1638.49
	2652.24
	1925.32
	1701.68
	1453.62
	1984.68
	1412.32
	3909.68
	1474.4
	1867.54
	2400.59
	2303
	4537.97
	1499.87
	1442.6
	2131.65
	2744.59
	1924.54
	1534.68
	3200.84
	2399.7
	1988.03
	1428.54
	1425.7
	1977.54
	2249.84
	2834.11
	2968.24
	1440.49
	4834.43
	1709.97
	3331.62
	2004.03
	4841.19
	1998.38
	3127.65
	2030.11
	4695.27
	7392.95
	6592.65
	1374.08
	1818.3
	2938.68
	1342.19
	1394.95
	2571.38
	4374.65
	1411.19
	4179.19
	5538.62
	1513.54
	1985.97
	5071.95
	6528.43
	1895.4
	1951.24
	2250.05
	1443
	2722.76
	1509.78
	3839.57
	1432.49
	2356.57
	3107.32
	1948.38
	1698.92
	1588.76
	3089.19
	1746.62
	1670.05
	1544.3
	1952.38
	2388.19
	3209.46
	1591.27
	1499.32
	1465.49
	1825.11
	1659.24
	1361.89
	2821.89
	1567.87
	1595.65
	2594.11
	1705.76
	1540.08
	4943.73
	2422.27
	4370.32
	1930.84
	2054.19
	2157.3
	1807.76
	3014.46
	1746.08
	1837.11
	1821
	1667.16
	1494.05
	1859.3
	6584.4
	1611.95
	2815.03
	1879.6
	1598.32
	1562.19
	1815.19
	1899
	1772.08
	4010.16
	1678
	2980.89
	1394.65
	4812.05
	1662.92
	2517.41
	3045.35
	3165.32
	2045.95
	4497.05
	2929.95
	2941.51
	1309.65
	1703.81
	1652.57
	1942.76
	4510.86
	1275.38
	4315.76
	1342.35
	1715.65
	1760.68
	2862.76
	2031.05
	2912.08
	2582.78
	1926.22
	1787.4
	2456.84
	2072.41
	1299
	1427.62
	2956.43
	1361.73
	3047.03
	1434.19
	2249.43
	1378.43
	3609.89
	1796.95
	1914.57
	1446.4
	2802.76
	1432.81
	2317.27
	2809.51
	1577.49
	1809.35
	1619.08
	1475.38
	1452.57
	2384.95
	2237.41
	1672.54
	1683.51
	2976.46
	1442.16
	1398.08
	1805.78
	1917.51
	3940.7
	1906.49
	2517.05
	1503.32
	1558.78
	1867.16
	2127.51
	5113.92
	3880.11
	3403.81
	7544.22
	4235.86
	1385.38
	2910.68
	1762.95
	2427.7
	3537.95
	2480.43
	2805.78
	1465.76
	1604.49
	5796.14
	1326.19
	2858.32
	2190.05
	1949
	4024.08
	2048.08
	1712.27
	4488.32
	1301.89
	2369.08
	2370.05
	1693.78
	4555.84
	2525.65
	1897.73
	1631.7
	1965.3
	3062.89
	1706.38
	6126.84
	3664.24
	1941.95
	2375.62
	2429.49
	3563.54
	1945.73
	1665.03
	1347.3
