# Supplementary material for: Structural organization and dynamics of FCHo2 docking on membranes
Source: eLife. 2022 Jan 19;11:e73156. doi: 10.7554/eLife.73156 (PMC8798043; doi:10.7554/eLife.73156)
Supplement: Figure 2—source data 1. [file elife-73156-fig2-data1.xlsx]

## Sheet: Figure 2D
only Cyto	F-BAR	F-BAR-x	FCHo2
1.11391	0.726345	2.97528	1.4142
1.28434	2.02905	1.20968	2.60563
0.548991	1.50341	2.39068	0.961164
0.798271	1.6369	2.53186	2.74155
0.973801	1.58502	3.4086	1.28171
1.03602	0.918831	3.18593	1.69518
1.14453	1.68182	1.62903	1.20844
1.00048	1.61039	2.20645	2.23294
1.10759	0.984416	2.17281	1.39477
0.990943	2.1859	3.349	1.42704
1.15435	1.44026	2.8739	1.67741
0.607718	1.12338	2	2.00957
0.740474	1.68101	1.29435	0.973545
1.4013	2.63725	1.4121	1.97912
0.99097	1.24782	3.02937	1.65432
0.858256	1.95011	3.09498	1.61434
1.14805	1.81345	2.434	1.10652
1.26551	1.00286	2.53629	1.41773
0.783141	1.1706	2.16283	2.23473
0.995773	1.76626	1.22581	3.20886
1.4438	1.11555	1.23963	1.40313
1.10375	1.98439	2.60044	2.83854
1.18732	2.15821	1.69355	1.62857
0.973314	1.37468	1.2765	1.20988
0.914947	1.59707	3.13765	1.73108
0.683718	1.67838	2.54158	0.793416
1.40484	1.72574	0.903226	0.792524
0.546974	1.6809	0.865591	2.4175
0.823899	1.55809	1.22581	4.24473
1.22054	1.20679	1.73081	2.89911
0.908992	1.90392	0.891496	1.29052
0.944497	2.10321	1.40143	1.04321
1.15584	2.35184	2.2621	1.02664
1.261	2.18962	3.63502	0.885297
0.73169	0.65317	1.67608	0.922986
0.879363	2.32455	2.02581	1.96287
0.979547	1.35419	1.49516	0.993141
0.929573	2.7684	2.78282	1.67323
0.889049	1.30895	1.90121	2.41092
1.05309	1.47403	7.39631	1.10226
1.01216	0.746032	3.05376	2.50602
1.1946	2.54287	2.2129	1.2338
1.00483	1.04329	1.25806	1.16146
1.11509	1.35619	1.18548	1.07771
0.62805	1.76263	1.25806	1.30338
1.3391	1.69293	1.7871	2.35608
1.1535	1.93945	2.00645	2.6037
1.12053	1.34295	2.35624	1.15969
1.09685	1.28226	2.02452	1.16306
0.766571	1.06154	1.72258	1.66375
1.33059	1.50091	1.32258	2.74944
1.17718	1.51732	2.04871	1.07743
0.876904	3.10621	1.92817	1.68313
0.727612	1.24522	1.70392	1.49185
0.873343	1.16974	0.816129	3.07597
1.55109	1.79333	3.8425	1.88448
1.05771	1.74412	3.16308	1.57256
0.748756	1.00826	2.29211	0.877719
0.941204	0.851948	2.34618	1.19488
0.998236	1.99351	2.68352	2.02689
0.952738	1.19107	3.35089	1.22757
0.67745	1.56905	1.34491	2.50226
0.577155	3.09896	2.20072	2.25721
0.847076	1.34879	1.33251	1.87654
0.935841	1.77552	1.43695	1.0416
0.934678	1.37557	2.44854	1.39673
0.909091	1.15584	1.11205	1.01635
1.17189	1.85847	1.08065	0.716049
0.990994	1.74162	1.92649	2.60503
1.09054	1.18831	2.80287	2.34682
1.08272	1.28182	2.55871	2.57516
1.23676	0.568287	0.940092	1.22149
1.08357	2.54961	1.41129	2.40486
1.19164	1.31558	1.21005	1.07284
0.632186	1.52162	2.11613	2.40662
1.01019	1.2226	1.58065	2.10304
0.601312	1.0405	2	1.00823
0.746718	1.13058	0.955857	2.29073
1.07286	1.48367	0.903226	1.29414
0.775937	1.51745	1.15613	1.58915
0.45389	1.63727	2.47235	1.09124
1.09894	1.29819	2.66444	1.38855
0.95436	0.987013	2.96456	0.744108
1.01867	1.19037	2.98974	1.72153
1.22176	0.455844	1.93728	0.655423
0.868007	2.3672	1.67097	1.34267
1.03833	1.90419	2.6129	2.56035
0.940879	0.638725	1.39516	1.17571
0.550506	1.31136	2.01075	0.631916
1.04117	1.2018	1.98925	1.13914
0.844979	2.3924	1.15023	1.92318
1.6317	1.76623	1.33935	2.41152
1.22141	1.37013	1.50413	1.07682
1.09414	1.21788	1.88065	3.70602
1.25818	3.23247	1.41478	1.16122
1.05043	0.842105	1.80645	1.16385
1.08648	1.97121	2.09065	1
0.842208	0.976162	0.785414	2.01901
0.24928	1.35655	3.08333	1.06173
1.16086	2.4513	1.64902	1.16583
1.10663	1.01748	0.88172	1.76987
1.41659	0.74026	2.74962	2.81893
0.940736	2.01864	1.74194	1.13387
0.943138	1.22824	1.7065	3.3325
0.797606	0.923469	2.00922	1.20202
1.27928	1.70668	1.08325	0.950617
0.936119	1.38896	2.55633	1.47309
0.917227	2.19399	1.92375	1.46253
0.710301	1.49351	0.896278	1.38496
1.17237	1.07267	2.1694	1.18107
1.01279	2.30793	1.51999	0.770062
1.04364	1.19714	2.18454	2.40329
0.884339	0.836482	2.14611	1.07407
1.1363	1.20802	1.32903	3.39571
0.833192	1.99992	1.46595	2.374
1.31017	2.27033	5.77204	2.65197
1.00841	1.43682	2.05538	1.06227
0.986507	1.84416	1.53226	1.46069
1.29385	1.30241	1.23963	1.28785
0.80871	1.36482	2.56075	0.938624
0.569885	2.37466	1.5568	2.18106
0.735325	0.956915	1.0871	1.56033
0.777137	1.59381	1.16129	2.11184
0.739113	1.65236	1.32111	1.60309
0.749664	1.25974	3.1353	1.97119
0.913004	0.991979	2.42229	1.43997
0.912346	2.32921	0.957478	1.75309
1.13531	1.33586	1.03687	2.82369
0.884601	1.41354	2.14237	1.56629
0.933028	1.80758	2.3871	1.62654
1.17611	1.13771	2.01446	1.94753
1.15877	1.34437	1.55925	1.16173
1.50103	1.78305	1.1371	2.53375
0.964306	2.16529	2.22514	1.22373
1.17121	1.7308	2.97032	3.45767
1.06587	0.733148	4.87097	1.40928
1.21775	1.48494	1.7817	1.4563
1.24184	2.86339	2.52742	2.86476
1.02981	0.965677	1.19795	1.34298
0.761485	1.73249	2.09677	1.09828
1.38016	3.36352	2.1362	0.938272
1.02882	2.03531	1.99224	1.8433
0.776433	1.56334	2.32736	1.1358
0.757925	1.10506	2.8641	1.28585
0.644092	1.79582	0.935484	1.20058
0.669142	1.37837	1.25422	1.64691
0.575648	1.52029	1.15625	1.07104
0.901796	1.61072	2.35484	2.71631
0.944086	1.03856	2.38221	1.2284
1.07038	1.1655	3.13882	1.94611
1.06806	1.48368	1.8871	1.85932
0.851836	1.22439	2.94399	4.04374
0.921249	1.9697	1.16308	1.04049
0.839003	2.8961	1.23502	1.99101
0.772719	1.68774	1.72645	0.909549
0.576945	2.38961	1.9364	1.4465
1.06828	1.19953	1.67742	1.00322
1.20478	1.28139	4.06452	2.09379
0.807097	0.719824	1.28252	2.93178
0.97592	1.7746	1.62779	1.18056
0.903569	0.910482	1.63656	0.728395
1.10217	1.28683	1.5416	2.36057
0.804278	0.75487	1.69032	0.969136
1.17233	0.887581	1.08065	3.4039
0.716344	0.662338	3.05396	2.52131
1.20651	1.03812	2.54888	1.96296
0.791848	2.14568	1.02903	3.25446
1.33835	1.19876	1.99057	2.35788
0.754576	0.745826	1.04501	1.78738
0.948271	0.876623	2.62942	0.981315
0.87143	2.32374	1.64315	1.31975
1.4927	1.23887	1.53156	1.21271
0.993756	1.10373	2.83645	2.25116
0.77604	1.40702	2.05645	3.02815
1.13824	1.39395	0.8	1.3114
0.881124	1.37172	1.67564	2.02932
0.964999	1.07792	1.84129	1.74757
1.00281	1.31097	1.81275	0.98883
1.09383	1.58803	0.943548	1.23529
1.13998	1.78937	1.49462	2.87748
0.933679	1.60029	1.54839	2.00498
1.51297	1.30736	2.94555	1.4716
1.64697	1.69988	4.0681	2.2246
1.29843	1.11311	1.5	1.43386
0.634582	1.05547	1.5637	2.85877
1.09248	2.11612	2.81434	2.7763
0.851951	1.48949	1.6799	0.728395
1.53923	1.13077	2.18681	1.67407
0.979827	1.87622	2.1374	1.36885
1.40954	1.02656	1.09677	1.3048
0.776409	1.32353	1.36364	1.15117
0.799135	0.989965	2.38429	2.56967
0.874063	0.926948	1.73994	2.26612
1.14793	1.18425	1.897	1.39187
0.86513	0.917027	2.49111	2.93545
1.18206	0.996753	2.15731	1.33951
1.14837	1.59091	1.89516	0.877211
0.993916	1.78636	2.5902	1.03998
1.0879	1.49582	1.81127	1.08299
1.08718	1.0641	1.61613	1.22115
0.516943	1.73997	2.0818	1.69701
0.90607	0.882395	1.82543	1.3642
0.703541	0.862554	2.49843	1.04691
0.981137	1.44219	1.83871	0.622575
0.739811	1.4316	3.22636	4.7619
0.973343	1.13106	1.97097	1.54463
0.898249	1.1311	2.89971	1.16931
1.33078	1.33185	3.6996	1.51987
0.621518	1.64719	2.20114	2.71418
1.31895	0.962338	2.75484	1.04086
0.528098	1.17551	1.35484	0.704545
1.06168	2.19874	2.2509	1.42745
1.23555	1.86058	1.54378	1.95112
1.15812	1.67058	2.33017	1.01852
1.26977	1.26838	3.09637	1.33657
0.756262	0.736934	1.05511	1.42956
0.644485	1.32682	2.00717	1.43263
0.816783	0.758315	2.95863	2.70062
0.775216	1.59584	1.42652	2.07528
1.12546	1.26316	1.97723	3.63305
0.694551	1.80591	1.13405	2.48485
0.862392	2.07774	1.78198	1.21164
0.789625	1.40779	2.15385	2.24381
1.13067	1.18468	2.14171	2.02404
0.993164	1.36101	1.41475	2.42213
1.50925	0.725806	1.8629	2.09844
1.01794	1.1961	1.94132	4.41212
0.891598	1.26238	0.947891	2.57794
0.821432	2.25406	2.04934	3.06982
0.752605	1.10903	1.6841	2.10189
1.05007	1.88772	1.84332	2.14865
0.670275	0.950928	1.73446	1.06503
0.818326	1.17646	1.26788	1.21009
1.28058	1.72966	0.817204	1.2141
0.882291	1.0996	2.78543	0.990741
0.746094	2.23647	3.47312	1.80099
0.791636	1.23687	1.03226	1.23457
0.885207	1.4539	1.49032	1.78661
0.852677	2.92593	2.63151	1.17531
1.5653	0.937229	1.98387	3.78368
0.519452	1.18931	2.18216	0.91553
1.36274	1.01991	1.17339	1.65241
0.733978	0.823748	1.39785	0.957672
0.880934	0.711876	1.60887	1.63335
0.992012	1.23254	1.70415	0.863935
1.38486	0.910714	2.58954	1.47307
0.773732	0.925144	1.83871	0.759749
0.750904	0.600649	1.33871	1.96761
0.892219	1.15974	1.2754	1.23528
0.772334	1.16883	2.48113	1.49155
1.07653	1.00649	2.68356	2.19128
0.734341	1.05504	0.935484	0.856109
1.01132	1.52727	2.81191	1.39031
1.04139	0.984962	3.74136	1.29952
1.19693	1.60077	1.47005	1.0278
0.945245	1.1433	1.70683	0.992684
0.813808	2.27594	1.48387	1.72572
1.12354	1.51204	2.30479	1.03951
0.908864	1.8717	1.5871	2.43454
0.887608	1.46494	2.97974	1.12459
1.13681	1.75801	2.31484	2.42296
1.07262	2.14157	1.65233	2.24018
0.812225	1.06623	1.66129	1.48551
0.793948	1.39905	1.37097	2.77597
0.992762	0.880712	2.06452	1.60494
0.87554	1.0591	1.46595	1.80161
1.12142	1.2987	2.73491	1.31151
1.20449	0.888799	1.19265	3.28054
1.19147	2.15876	1.81221	5.2614
0.673775	1.69852	2.14747	1.84466
0.963936	0.827184	1.49731	1.51531
1.21936	1.9305	2.01075	1.45062
1.1149	1.41754	2.74669	1.24177
1.2171	1.48273	2.56625	2.39251
1.03602	0.802887	0.790323	0.710758
1.17053	1.99162	1.64516	2.26134
0.958501	2.3298	2.24014	3.69791
0.80527	1.62446	2.70447	1.4935
1.00252	1.41558	2.95341	1.23231
1.16212	0.638528	1.52438	1.92234
1.03222	2.69415	1.50538	1.42026
1.03674	1.67005	3.62309	1.26455
1.2732	2.21727	1.29724	1.14145
0.414986	2.07029	2.47581	1.01086
1.14753	0.982018	1.49247	1.98272
1.00317	0.93332	1.57823	1.80582
0.472262	1.05811	1.43952	1.64351
0.926513	1.64887	1.08871	1.84691
1.07587	1.07792	2.52581	0.857068
0.853136	1.38994	0.947581	1.96747
0.972099	1.44843	2.06855	2.18984
0.808864	1.78935	1.35777	1.53849
1.11018	1.16108	1.27419	1.29929
1.0752	0.897429	3.19355	0.982971
1.11229	1.49401	2.29839	1.47388
0.97219	2.47993	2.90153	1.25926
0.900341	1.52857	2.33259	1.97835
0.896254	1.88261	5.50403	1.3843
0.76603	1.08943	2.3995	1.6358
1.07081	1.48295	4.01165	2.27588
0.714164	1.00089	1.23118	2.269
1.17393	1.73044	4.13262	1.49808
0.714697	1.54412	2.52903	1.49136
1.09337	2.39899	1.74194	0.804527
0.747728	0.963913	1.72782	1.86008
0.882471	0.935065	2.11613	0.733333
0.991227	1.02754	2.64415	3.86265
0.94876	1.79613	2.11321	1.19522
0.61445	1.00682	1.59801	2.2026
1.08595	2.67857	3.05902	0.654321
1.0248	2.2906	1.77419	1.71225
0.91826	0.793831	1.3827	3.92218
1.12752	0.62987	3.79839	2.09886
1.21436	1.07143	2.72177	1.4222
0.807493	1.05108	2.04677	1.80329
1.17717	0.962302	1.35748	1.31693
0.960338	0.983766	1.77062	1.59873
0.772334	2.02779	1.7235	1.18574
1.06291	0.907407	1.70968	2.2769
1.23285	2.01155	2.29536	1.92458
0.702773	0.891775	1.17604	1.26876
1.01028	2.2506	1.74839	1.36531
0.862354	0.820013	1.6922	2.42358
1.33213	1.22224	3.0553	2.4321
1.11623	1.49538	3.12119	1.31242
1.0397	0.941558	1.97265	1.38785
1.08839	1.47845	1.73594	2.48114
1.02251	1.78283	2.31378	1.48412
1.0021	1.07761	4.35516	2.17022
0.98181	0.597403	2.10484	1.59199
0.994458	1.48721	1.95699	1.15344
0.803794	1.73639	2.5	0.875611
1.54014	1.32021	2.80069	1.39702
1.14819	0.884927	2.95968	0.574074
0.985426	2.68365	2.13113	1.58568
1.23092	1.18524	2.27823	1.81369
0.606513	0.987432	1.20507	2.03133
1.13962	1.91383	2.59839	2.12008
0.964677	2.11561	1.08933	0.902778
1.0945	2.17665	3.16129	2.53459
1.29779	1.71562	1.32488	1.08642
0.281392	1.13201	2.44118	2.01512
0.863977	1.07503	0.95416	2.55322
1.08493	1.11929	2.55601	1.06285
0.818837	1.37662	1.7866	0.79987
0.691162	0.690747	2.69512	1.00024
1.18494	1.51948	2.01926	0.977908
1.77522	1.0109	1.46774	0.982571
1.06433	1.27737	2.54252	2.67666
1.04265	1.43804	2.14516	2.49198
0.931282	1.22159	3.90065	1.78402
1.01566	0.920455	3.62968	2.04095
0.831059	1.26411	1.40726	0.711934
0.843612	0.916667	2.60345	1.31284
1.03406	1.22105	2.30578	1.36808
0.836444	1.8496	1.76498	1.88889
0.796761	2.08339	4.06489	2.57154
0.832985	1.87338	2.11976	3.02715
1.11887	1.76317	0.666667	0.84653
0.921151	2.89935	3.21059	1.27756
1.4976	1.31279	2.6126	5.13481
0.889265	0.72987	2.93297	1.20602
0.847839	0.980519	3.87097	1.90685
1.11467	1.81995	3.22663	1.91437
0.980049	1.34116	0.787097	1.78024
1.12459	2.22348	1.58669	1.79719
0.977426	1.71104	1.85663	2.97572
1.04478	1.10921	1.37634	1.91358
0.905324	0.884416	1.18433	1.49383
1.19455	0.960949	0.766129	1.43925
0.903897	1.0427	2.31855	2.08025
1.37889	0.615955	2.20923	0.786008
1.25379	0.914057	1.40207	1.76389
1.01254	1.28708	3.60518	1.74104
0.838217	1.13253	2.95778	1.50162
0.691503	0.960355	3.15695	1.56
1.21137	0.870206	3.05887	2.09619
1.21706	1.07143	1.41593	2.20635
0.892085	1.30649	1.9543	1.2332
0.815562	1.24977	1.34135	2.4932
0.755538	1.72436	3.40196	1.65079
0.926632	1.29004	2.31967	1.1608
0.881488	1.15311	1.35753	1.4321
1.30918	1.39492	2.63642	2.52626
0.978706	1.87059	2.9693	1.20451
1.25234	1.21396	0.819102	2.11959
0.840058	2.27273	1.23118	4.66079
0.74451	1.50866	1.58525	1.54938
0.772514	1.22045	2.32258	1.01852
0.880486	1.11195	2.23226	1.32584
1.02289	2.23469	1.79378	1.4633
1.0024	1.1089	2.05591	1.90867
0.721309	0.940809	2.51613	1.99118
1.0689	1.11511	3.10323	2.04399
0.759572	0.7	1.69231	1.85796
0.998725	1.09119	2.66325	1.26341
1.27405	1.22967	1.24373	1.40174
1.03618	0.35436	1.70968	3.6701
0.997983	1.20022	4.29954	1.40527
0.691584	1.14164	1.66876	1.10646
1.04844	1.10585	2.06891	1.00494
1.10346	0.652597	2.83871	2.27782
0.630163	1.73226	2.23821	1.18596
1.0534	1.16494	1.28315	1.61997
0.753335	0.956651	1.6907	1.60721
0.891451	2.90734	1.86022	1.72571
0.836266	1.44284	1.08602	1.18381
0.487992	1.7987	1.97849	2.05301
0.623713	1.10977	1.57166	2.11916
1.3071	1.48149	1.33871	1.53704
1.31982	1.27495	1.32258	3.08917
1.11356	0.741721	1.03226	2.7573
1.04673	1.12941	2.16549	1.07791
0.992338	0.938528	1.6371	2.72409
0.732565	0.749622	1.44028	2.44049
1.24928	1.17042	1.48925	1.96772
0.712296	2.49503	1.67581	0.972088
0.597022	1.32709	1.63167	2.28571
1.24166	1.31408	2.37496	0.971193
0.683958	1.42442	1.01001	1.67949
1.34011	1.25753	1.93548	1.81933
0.959517	0.84632	1.87419	2.35294
0.80599	1.62498	2.02593	1.40642
0.909372	1.35859	4.03226	1.44033
0.915218	1.93201	3.26667	1.08737
1.39193	0.525325	2.00461	1.9768
0.792811	0.763636	1.60764	1.04472
2.01441	2.61971	1.32903	2.7834
1.06665	0.877435	1.28831	3.87397
1.11481	0.665179	1.04301	2.77596
1.00238	0.634508	1.64794	2.05946
0.960868	1.29748	1.15543	1.75951
1.24376	1.34626	2.16075	1.07319
0.831604	2.042	2.01075	1.53039
0.98415	1.06087	2.02605	1.02482
1.32277	1.48189	4.1828	1.88148
1.02144	1.28293	1.60124	2.31521
0.779059	1.64809	2.66042	1.37531
1.44068	1.06444	1.35732	1.43416
1.05079	1.28766	3.43548	1.7383
0.835846	0.385281	1.92137	1.20547
0.837536	1.24067	1.9319	2.4184
1.22288	0.570376	1.16882	2.18042
0.956612	1.34023	2.54815	2.11977
0.635143	1.91107	2.25288	2.88017
0.874509	1.73377	3.1549	1.39437
1.40418	1.65624	1.20609	2.80429
1.2103	1.04677	1.35294	1.62128
1.08934	2.19201	3.89512	1.20504
1.14286	1.11364	2.06893	2.30428
1.04372	1.44264	2.5571	1.21943
0.95584	0.929915	1.59274	2.53598
0.495837	1.24047	2.00717	0.992659
0.879801	1.56674	2.85191	2.53368
1.45034	1.2013	1.93333	1.17284
0.486145	1.40944	1.36559	0.85571
1.22863	1.85622	3.27414	0.901235
1.5303	0.861558	2.85806	0.92861
0.912547	2.24768	0.636201	1.14668
0.763977	1.00143	1.92473	1.33242
0.906407	0.958593	2.41935	5.70408
1.2499	0.971563	1.35582	4.31865
1.15264	1.72422	3.79404	1.23945
0.961095	1.04312	3.14107	2.28362
1.14188	1.50325	2.59498	1.42906
1.19059	1.43377	1.04004	2.60907
0.839193	1.53094	3.00587	3.23104
1.22382	1.44194	2.07097	1.53301
0.884006	1.34405	1.74839	1.56889
0.674898	1.37054	2.21986	1.40555
1.26131	1.39086	2.65245	0.897805
1.16859	1.82305	1.4868	2.04862
0.81196	0.934137	1.39401	4.99833
0.870893	1.27706	2.05693	2.73013
0.986311	1.20162	1.14839	1.44304
0.706495	1.24242	3.04576	2.4174
0.987846	0.868275	0.76682	2.00221
0.917087	0.820779	2.15633	0.991486
1.08874	1.39246	2.04301	2.07662
0.929189	1.62176	1.74671	1.51704
0.78229	1.70947	1.02509	1.68897
2.48829	1.2013	2.55914	1.65824
1.14825	0.583874	1.94118	1.88755
0.699808	1.63047	3.60028	1.77898
0.957296	1.17931	3.58326	3.18575
1.39228	1.01812	0.967742	1.52117
0.99087	0.570582	1.74962	2.77649
1.01197	1.4013	2.39785	2.30927
1.0997	1.51299	1.99333	1.02794
0.846725	1.03419	3.67427	1.54453
1.06668	0.820656	1.75806	1.34234
0.5204	1.40909	0.935484	1.20433
0.973898	1.08847	3.35484	1.894
0.98612	1.27899	2.08336	1.22685
0.918729	0.823284	2.31613	1.22305
0.910482	1.25325	2.81886	1.62581
0.805726	1.75974	3.05255	2.30758
0.575648	1.58092	1.57816	0.632922
0.769041	0.858442	2.20645	2.30312
0.955171	0.950835	2.33067	2.06143
0.881106	0.818182	1.67742	2.41639
1.52492	1.50649	0.789082	2.09357
0.444216	1.00189	3.26641	1.36831
0.995145	2.4209	3.06452	1.08642
0.957324	1.44862	2.94032	2.51429
2.48127	1.52974	2.38446	3.99749
0.715658	1.06006	1.50509	3.0703
0.822343	1.5316	3.06978	1.53074
0.839016	1.1741	0.987097	2.17664
1.006	1.14935	1.00293	1.1467
0.767007	1.06818	1.27789	1.54471
0.5933	1.99573	1.5132	1.12346
1.14536	1.18074	1.37001	2.34347
0.989079	1.04236	2.57771	1.01372
0.695965	1.07443	3.09365	2.0988
1.0242	0.891402	3.18305	1.90883
0.628242	1.09263	1.44946	2.98333
1.12698	0.844156	2.74765	2.25182
1.12439	1.09731	2.06585	1.04588
1.05581	0.739261	4.17406	1.62364
0.675607	1.88451	2.45743	1.12346
2.13296	0.741883	1.59736	0.965517
0.63846	1.78893	1.1085	1.49206
0.599629	2.7724	2.29731	2.75101
1.07639	0.518553	1.43011	0.855967
0.706772	0.974954	2.29032	1.27407
0.821943	1.96562	1.52722	1.8547
0.752755	1.42243	1.14477	2.35485
0.776325	1.56995	1.93548	2.82531
0.990422	0.965267	1.90006	1.38025
0.873877	1.59868	2.0023	1.72531
0.920173	1.27387	3.53763	0.94213
0.933436	1.16522	1.53112	1.27889
0.816956	1.78749	3.35681	1.26599
0.960555	1.18047	2.58952	1.86667
0.936239	0.87987	3.82796	1.41369
1.33362	0.991775	2.62903	1.97398
0.775216	1.89204	1.31541	1.90359
0.927651	0.916976	2.66339	2.53371
0.907781	1.27771	2.28843	1.03288
1.49388	0.876623	2.55087	0.864672
0.703794	1.76984	2.6509	0.978395
0.689481	1.08222	2.93114	1.18076
0.808612	1.57143	1.66359	0.897531
1.08934	1.71961	3.46595	1.23142
1.24063	1.15422	1.61505	2.85597
0.886071	1.5843	1.96603	1.86559
0.594831	0.814077	2.13337	1.27837
0.994236	1.0763	4.19868	1.87764
1.05885	0.820779	2.30599	2.20204
0.921331	1.45333	2.87097	1.61661
0.843454	2.13727	1.24839	1.81924
1.04117	0.845974	2.89634	1.49418
1.21278	1.00361	0.912903	2.58974
0.831862	0.595238	1.80645	3.28855
1.18948	1.73305	1.53763	1.369
1.04771	1.56272	1.45968	3.78655
0.912104	1.14286	1.54839	2.07686
1.04966	1.43506	3.79032	2.25891
0.657061	2.16727	3.01787	1.76285
0.821737	2.07421	2.22544	1.87617
1.20749	1.29103	1.58504	1.30797
1.06796	1.40422	1.42652	1.24691
0.729467	1.45331	2.58993	1.22235
1.02502	1.20838	1.27343	2.96628
0.607589	1.18988	2.28001	1.11267
1.14185	2.08688	2.17647	1.33218
1.0208	0.951659	1.54839	2.72945
1.0399	2.9918	2.71409	1.50577
1.07029	0.866234	1.62366	1.69529
1.17032	1.14791	2.25806	2.83264
0.815802	1.7056	1.4572	0.989899
0.767901	0.818182	2.14785	2.1078
0.619597	0.674734	1.82863	2.54475
0.875797	0.673889	1.35373	3.78198
0.747659	0.874768	0.991511	2.28597
1.13147	1.10136	2.30645	3.49133
1.0016	0.798701	3.16562	2.05776
0.964697	1.50994	2.74902	1.20051
0.984025	2.04217	1.99247	2.5124
1.29798	0.698052	2.55161	0.924326
1.54611	1.01577	1.64516	1.35802
0.942939	1.30974	1.41129	1.2868
0.997821	1.06149	3.06855	1.80617
0.659521	1.08442	1.68475	1.09589
1.29662	2.32862	2.2993	1.3035
0.619258	0.954545	2.79869	0.773346
1.2508	0.733766	1.87814	2.02606
1.19481	1.71795	2.67509	1.23765
0.732547	1.54121	3.3617	2.09899
0.771374	1.56048	1.83871	1.04153
0.988518	1.73468	1.53576	2.11976
1.0846	0.997114	4.09288	1.84321
0.504755	1.36869	2.4108	4.21071
1.27089	0.937601	2.30968	1.34568
0.958143	1.76684	1.85515	1.98988
0.61449	1.88089	1.08483	2.3355
1.16073	1.18836	1.40553	2.49749
1.23106	1.42078	1.04839	0.973545
0.485591	1.0793	2.01382	1.6496
0.97818	0.840909	2.19502	0.944444
1.20379	1.06331	2.30886	1.44008
0.984726	0.955087	2.57103	2.32548
0.895435	1.6251	2.62023	1.89039
0.750055	1.6034	1.76393	1.03747
0.49084	1.07736	1.5529	0.694229
1.14601	2.16275	2.10887	2.38493
0.940315	0.983896	1.66129	3.52511
0.887992	1.68831	1.21659	1.15432
1.13698	1.19805	1.40323	1.37757
1.01335	1.44048	2.32576	2.48504
0.815135	0.722673	2.95308	1.3037
0.904393	1.22982	1.9725	1.70902
0.848613	1.42542	2.39188	2.1281
1.20503	1.15377	1.32258	1.09877
0.853432	0.749084	1.16129	1.97282
0.889822	1.02078	1.56452	1.66812
0.90387	1.67139	2.75101	2.11037
1.24326	1.52722	2.49677	1.66667
0.974994	1.16424	3.96152	1.80833
1.28448	0.916576	2.66129	1.43364
1.25532	2.05651	2.58266	2.0679
1.07989	3.36238	1.27599	1.42936
1.73103	1.2428	1.30005	1.84829
0.811239	0.722424	1.89762	1.85156
0.822622	0.882719	2.96898	1.2411
0.680612	1.93074	2.00348	3.54215
0.94601	2.77994	1.36774	0.695006
1.0941	1.78896	3.33892	3.47336
1.04774	1.68204	1.15484	3.12346
0.782133	1.02597	3.15668	1.35942
0.69425	0.991434	1.79409	1.4223
1.18955	1.24838	1.79156	2.80741
1.24917	1.02868	1.50538	0.822751
0.784124	1.42641	1.35253	1.17747
1.27583	1.9823	1.40375	1.81936
1.41925	1.3077	2.85602	2.68817
0.869783	2.94499	2.03226	2.32533
0.92438	0.885914	1.56452	3.59852
1.07434	1.44143	0.854839	0.842355
0.998611	1.3224	1.29032	1.39648
0.850629	1.48999	1.55218	2.24424
0.874686	2.61633	2.70484	3.3328
1.0494	1.70417	2.49104	1.41327
0.648415	1.25994	1.58065	1.12124
0.655712	1.27561	2.72581	2.16992
1.09087	1.52211	1.69355	1.11376
0.858671	1.37073	1.88805	1.56465
0.813421	0.834545	1.84487	3.95131
1.25919	1.00649	1.76344	1.69312
1.32334	0.932318	2.02285	1.18078
1.02869	1.57024	1.70096	1.94837
1.25766	1.94019	3.48144	1.59427
0.806916	1.36693	1.46505	1.55432
1.4834	1.53759	1.53019	1.1501
0.96233	0.590909	1.90673	1.57086
1.04805	1.29221	1.4319	0.989969
0.562536	0.865865	1.83871	2.19396
1.12436	1.10331	1.58468	1.34074
0.618025	1.05402	1.62227	1.89207
0.575216	1.03117	2.54667	1.95273
1.2809	0.906094	3.37807	1.16151
0.933031	1.77597	2.49194	2.29293
0.948127	1.34466	1.53372	0.701804
1.35414	1.62959	1.71889	1.51605
0.977151	1.15909	1.7208	3.15286
1.16201	1.45767	3.56129	1.67003
0.962147	1.42208	1.76083	1.69111
0.828024	1.12392	2.06452	1.08642
1.17646	0.759347	2.34777	3.03675
0.958546	1.7062	2.81302	2.66843
0.97189	1.01755	1.23408	1.08779
0.868813	1.50325	1.16129	2.09722
0.820853	1.41477	3.30756	0.794356
1.06779	1.32032	1.31452	1.37037
1.06178	0.88473	4.05882	2.47222
1.04788	1.47835	1.09879	2.19819
1.11084	1.30336	5.37473	1.46188
1.03278	1.33682	2.74194	1.15586
1.15247	1.856	3.14964	1.93597
1.1117	1.51372	3.60774	2.96414
1.30908	1.97082	1.55536	4.16866
1.03709	0.872294	2.52233	1.93827
0.77312	1.36662	2.41075	1.93373
0.837695	1.50446	2.19787	1.31373
0.941069	1.30195	2.6767	2.42204
1.63665	0.888112	1.32258	1.78312
0.910462	1.68279	3.25386	1.67179
0.991434	1.53287	1.44624	1.55617
1.14159	1.4328	2.96861	1.23457
1.05478	1.58205	1.71452	1.19429
1	0.837662	1.31378	1.40215
0.659119	1.01735	1.49194	1.41679
1.47746	1.2892	1.51192	1.43539
1.07274	1.44264	0.758065	1.28241
1.11745	1.03319	2.95392	3.63911
0.733576	1.75857	1.38364	1.66184
0.69823	0.505313	3.05425	3.28211
0.922845	1.20305	1.39687	2.93946
0.622478	0.529685	4.31028	2.20475
0.973437	1.52238	3.87097	2.66204
0.617458	0.871212	2.16602	2.33078
1.36704	3.58785	0.534946	2.01111
0.912917	0.741901	2.02673	1.92331
0.634006	0.792062	3.57478	1.29111
0.786398	1.30155	2.7043	1.46293
0.917497	1.98282	1.08656	3.00677
1.01681	1.61596	4.02179	1.23742
1.20336	0.900162	1.72664	3.78289
0.855414	1.38975	2.39931	1.41812
1.17699	1.42641	3.48387	2.25483
1.4366	1.21079	3.01613	2.00846
0.712968	0.718615	2.36333	1.2908
0.884006	1.22536	1.76578	1.57273
0.882717	0.821429	1.5871	1.84684
1.07578	2.52603	1.31239	1.43807
0.894854	0.735714	1.93011	3.17937
1.27305	1.26364	1.28172	2.34289
0.747916	1.2631	2.3782	1.11176
0.80441	1.40633	3.16329	1.16635
0.870797	1.58586	1.07742	1.06
1.38056	1.31743	2.29435	4.17596
0.803526	1.04943	1.06452	5.32618
0.571085	1.37662	1.36076	1.05074
0.917744	1.78844	3.05161	3.79979
0.859468	0.746753	1.70968	3.22604
1.14613	1.08389	1.7588	1.81911
1.10995	2.66925	1.85484	1.07245
0.681453	1.58247	0.83871	1.62742
0.793462	1.23007	1.26427	1.57259
1.01045	1.32468	1.77634	1.08232
1.04223	1.18885	2.32258	2.96597
0.847851	0.978127	1.01344	0.681917
0.762865	2.26168	1.70609	2.72978
1.11028	0.922078	1.99951	0.939236
1.21037	1.15643	1.56272	1.66742
1.05944	1.46076	1.6929	4.02193
0.571653	1.43831	3.50645	0.992982
0.581788	1.53474	2.21487	2.22067
1.1134	1.16617	1.53949	3.27304
0.799081	0.981508	1.52074	2.94392
0.794965	1.39163	1.95256	2.73778
1.38184	1.87662	1.3712	1.24444
0.834887	0.720077	2.34822	2.69306
1.3768	1.01169	1.05184	1.31173
1.07676	1.1282	1.8	3.19122
0.997823	2.09108	2.78609	3.15556
1.0339	1.90666	2.28536	1.06162
0.76632	1.83625	2.43604	1.48789
0.877402	1.49242	2.63343	1.46
1.03026	1.01169	2.35484	1.44222
0.788143	1.5681	3.45161	2.73018
0.694524	1.10789	1.84375	3.7537
1.10252	1.75392	1.00262	1.922
0.984356	0.785924	1.6871	4.23744
0.617014	1.82828	2.02487	2.19404
0.916548	1.2316	1.00806	1.70403
0.649685	1.04246	1.6129	0.703472
1.22753	1.18414	1.87903	0.944889
0.845341	1.27816	3.14939	1.32941
0.77094	2.05141	0.935484	1.04444
0.921296	0.85224	1.84041	1.32469
0.863002	1.2862	2.46898	1.07881
0.564841	0.538961	3.23656	2.07488
0.948511	1.77408	2.4129	2.10494
1.31409	1.26948	1.99671	2.84949
0.933914	1.45772	2.90323	2.21693
1.20379	0.669805	2.21337	1.20159
1.06016	1.78474	0.83871	0.954416
0.59438	1.05596	2.61022	2.74403
0.98415	0.718615	3.55576	0.788889
0.982709	2.15003	1.15939	4.82937
1.00712	2.6553	2.02581	0.753333
1.13538	0.99513	2.16422	0.82402
0.858233	1.49351	3.98883	1.70141
0.787464	1.05894	1.49462	1.40885
0.599167	1.83518	0.989247	2.3499
0.32853	1.04935	1.92151	3.33385
0.797709	2.31961	1.83382	4.56436
1.72097	1.09561	2.32598	3.5807
1.93193	1.56388	2.53516	1.33827
0.846782	1.50536	2.06452	3.01667
1.39162	1.2454	1.62097	1.21655
1.25892	0.90395	1.45776	3.08306
1.00116	1.9212	1	1.01197
1.14785	1.3375	1.84516	0.888889
1.17951	0.982801	1	3.14857
0.946766	0.885552	2.12903	1.53889
0.861671	0.815317	1.2805	3.43045
1.63016	2.20455	0.928315	1.50924
1.11079	1.0687	4.79516	2.02737
0.939893	1.15011	1.24731	2.43689
0.840367	1.00736	1.34946	2.0734
0.688539	1.16076	1.2397	2.4009
1.01345	0.987013	2.58065	1.95575
1.19081	1.14242	3.2346	1.39521
0.908182	1.21251	1.39862	1.65
0.710938	1.16827	2.46237	1.44286
0.778098	0.922078	1.3732	1.17296
0.826513	0.971336	3.261	1.57119
1.2183	1.41837	2.02581	1.21414
0.511658	1.83216	2.52984	3.27354
1.60775	1.64037	2.08504	2.80823
0.792603	1.12464	1.90481	1.4302
0.820328	1.50974	1.6129	3.34875
1.06202	1.56976	1.46774	2.3961
0.736792	0.887662	2.9019	1.36732
1.2219	1.47569	1.77581	4.957
0.800072	1.02173	1.90133	2.75956
0.859795	1.83983	2.60538	1.16101
1.00168	0.802164	1.22581	1.2984
1.05623	0.866883	1.77419	2.88356
0.710992	0.861472	2.21121	1.4258
1.13977	2.04475	2.44463	1.61111
1.00824	2	3.30471	1.26541
0.8409	0.777597	2.48992	1.37766
0.536362	0.953725	1.85081	1.83366
1.2049	1.06764	1.69824	1.80904
1.1075	1.33978	1.10323	2.0891
1.3487	1.25974	1.52927	0.873611
0.917451	1.0777	1.68578	2.63581
0.920453	0.751701	1.90323	1.20827
1.15807	1.11039	1.84677	1.23889
1.19831	1.11009	1.11214	4.30326
1.45648	1.12023	1.58065	2.40602
1.85303	1.41013	2.83912	2.66175
0.908919	1.27922	4.044	1.30992
1.03285	1.79191	2.36774	1.1603
1.02978	0.672294	3.65899	0.981313
0.689769	1.40738	2.26686	4.04138
1.13198	0.515844	1.16129	1.16654
1.01831	0.730114	1.41129	2.82101
1.20379	1.05626	1.6828	1.56321
0.733429	1.08915	1.46658	2.19947
1.20858	1.35222	1.54839	1.90685
1.12776	1.27771	0.992832	3.59691
1.00808	1.28636	1.38213	0.675397
0.662904	1.14407	1.47782	4.32593
0.58769	1.71446	2.98864	2.70514
1.21894	1.42411	3.55444	3.51922
0.947314	0.731331	1.30184	1.18519
1.20845	1.76998	2.48387	2.47942
0.749472	1.95315	1.53151	2.25756
0.617435	1.40115	2.01135	2.86944
0.927954	1.08104	1.10753	0.873016
1.00758	2.02545	1.0088	2.1876
0.79519	1.54047	1.09677	1.14593
1.01441	1.17695	2.64919	1.17715
1.46764	0.802947	2.71537	1.09667
0.903712	0.692208	2.53113	2.91342
0.56196	1.66484	2.26103	1.74444
1.03602	0.984061	1.77419	1.15964
0.932932	1.33862	1.98439	1.26
0.677233	0.73951	1.39785	1.45269
1.10948	2.12687	3.07697	2.0362
0.964337	2.11834	1.06452	2.1359
1.00339	1.11644	1.65548	0.713333
1.0598	1.13975	1.56452	0.992982
0.685467	1.53937	2.21774	1.82686
0.910663	1.35273	1.66129	0.837037
1.27954	0.665584	3.15752	1.53559
0.933892	1.1858	3.5129	1.57889
1.10172	0.707968	1.95766	3.64603
0.824784	0.923477	2.00614	1.02639
0.973103	0.646494	1.27773	1.32904
0.959654	2.22747	1.95131	3.21355
1.0623	0.543599	1.00516	1.72227
1.00259	1.28774	0.860215	1.1125
0.928134	1.45325	1.85698	2.7712
1.02332	0.844156	1.17302	2.83938
1.5389	1.16357	1.16129	1.25412
0.569164	2.421	1.25367	1.70568
0.725813	0.97952	2.77769	1.441
0.977906	1.20718	2.22488	2.44359
1.0085	0.882189	3.5476	2.83981
0.867755	0.919643	1.28299	2.23264
0.603636	1.12134	1.69892	2.61752
0.676333	2.07424	2.35547	2.49692
1.12414	1.51005	1.01075	4.81019
1.34755	1.51248	3.05853	1.0607
0.456155	1.5487	0.669355	2.13571
0.700614	1.35137	2.22849	0.956331
0.959078	1.28788	3.80008	1.80125
0.773328	0.844156	1.75853	0.796784
0.717291	0.905594	1.45246	1.43422
0.78194	0.697431	2.44046	1.01377
1.01326	1.86039	2.66174	3.14163
1.01991	1.7151	1.82513	1.07576
1.09931	1.43715	1.04106	1.01931
0.813961	0.654545	2.02151	0.934417
1.02562	1.20044	2.27199	1.09608
0.760455	1.23392	2.11828	3.14652
0.777802	1.67658	0.951613	0.994444
0.885046	1.74612	1.20912	3.10925
0.831052	1.22595	0.879032	0.898611
1.0748	1.52273	1.396	2.5041
1.19337	1.41518	0.548387	1.39949
0.946206	0.652192	1.65261	2.11799
0.764906	1.41883	1.84839	1.76667
0.790535	0.888393	2.24373	1.48376
0.888964	0.637047	2.27419	1.06795
0.663442	0.981046	0.840607	1.61875
1.10512	0.821892	1.01613	1.60686
0.942327	1.31674	1.45261	1.7715
0.733112	1.06205	3.70464	1.49463
0.99936	1.4632	1.58065	1.0266
0.907781	1.06671	1.22939	1.8237
0.902978	1.45787	2.96357	1.26861
0.543768	1.31364	0.903226	1.22211
0.734128	1.14868	3.68496	2.85576
0.882599	1.41883	2.12903	1.85139
0.922767	1.09664	3.71935	1.62778
0.904346	0.980568	2.98733	2.45708
1.11828	0.829787	1.52941	4.66664
0.871298	1.37987	1.4565	1.82587
0.946458	1.43155	3.11901	2.13045
0.937697	2.15516	3.14262	2.78707
1.00529	0.669913	3.07803	1.16453
1.49748	0.751948	2.53788	2.50217
1.00948	1.52553	1.73812	2.10404
0.684831	1.2529	1.29032	1.3011
0.648175	1.02458	1.35484	1.19986
1.20194	1.37384	2.88147	1.50089
1.05349	1.51705	6.12144	1.65669
0.89909	1.01008	1.29416	2.58609
1.13344	2.08658	2.62366	1.38333
1.70797	1.21284	2.30221	1.3133
0.815223	0.872331	1.19355	1.60128
0.607109	1.42857	1.2745	1.0283
0.941423	1.5488	0.924731	1.76118
0.760807	1.79569	1.97581	1.31515
1.53775	1.11888	1.17742	2.11111
0.887091	1.32219	2.84349	0.518889
0.784102	1.20358	1.3318	3.47079
1.12008	1.05739	1.87793	1.28889
0.901935	2.03719	1.74839	2.93915
1.03444	1.37389	2.54427	1.61439
1.13433	0.787338	2.10411	1.81973
1.19747	1.70832	2.29142	2.63169
0.961095	1.59416	1.8109	2.31466
0.958213	1.29004	1.87231	2.09754
0.993068	0.556818	0.870968	1.32037
0.70543	1.38427	1.62581	2.37139
1.14781	2.41687	3.04642	1.01317
0.92234	1.13226	2.91532	1.48997
1.09611	1.45225	2.44934	1.78151
1.33899	1.45278	2.09677	1.21944
0.960508	0.714668	2.50242	4.28842
1.08357	1.16956	3.38769	1.28184
0.892326	1.33257	1.6342	1.3009
1.16427	1.2707	2.49007	0.816667
1.16186	1.66081	1.27097	1.19399
0.870338	1.28233	1.33138	1.60774
0.698762	0.672542	1.10098	1.50872
0.892219	1.35548	0.973919	2.85778
1.04253	1.10016	1.84264	2.08889
0.712227	1	1.45027	1.28378
0.795847	1.08963	2.02373	0.952778
0.903939	1.01976	2.65916	1.69735
0.923467	2.15283	1.17701	3.57778
0.819885	1.58357	4.06452	1.55222
0.875897	0.408163	2.21198	0.952222
0.879625	0.618592	1.19892	1.9901
0.795506	2.20313	2.44964	1.43889
1.30901	1.26092	0.85044	0.836111
1.51841	1.62857	3.71613	3.28954
0.952425	1.64208	2.31919	1.38615
0.680311	0.811688	2.22533	2.79829
1.01138	1.33189	1.22581	3.7358
0.652578	1.66322	3.29032	1.73806
0.961032	1.00503	2.81672	0.838095
0.749891	1.07558	1.35539	1.18413
0.940998	1.05195	2.70968	1.54314
0.743254	1.4468	1.35135	2.14083
1.25907	0.938853	2.89762	2.52883
0.953453	0.663223	1.46474	2.95946
1.78936	1.65265	1.71774	0.944444
0.661864	1.06465	2.13821	2.80151
0.86986	1.12216	2.18427	3.7461
0.884447	1.47998	2.64516	1.10788
1.04806	1.90823	1.02509	0.586243
1.11112	1.64123	1.49664	1.26111
0.933118	1.69933	1.9172	1.67852
1.12853	1.35373	2.06452	3.85658
1.05249	0.733176	1.67742	0.863889
0.988473	0.778902	1.95341	1.81951
0.93503	0.734331	1.32651	1.79603
0.511527	1.51238	0.980645	2.11795
1.37349	2.04274	2.70748	1.34114
1.0386	1.33929	1.27599	1.084
0.824207	1.59307	2.08468	2.18639
0.828006	1.57699	1.60387	1.84861
1.14251	1.44237	2.06452	2.35634
0.887653	1.14462	1.47555	1.81689
1.04013	2.21362	1.33548	1.46389
1.09701	1.96032	1.47643	2.57486
1.0302	1.75557	2.95884	1.73019
1.29478	1.10462	3.49597	2.79055
0.64254	1.03896	1.54137	2.16349
1.16249	2.11527	1.20873	1.5559
0.675793	1.18768	2.04448	1.91339
0.814661	1.70346	3.25729	1.76542
1.03975	1.48701	3.16129	2.95443
0.700173	1.13822	3.22018	1.37678
1.13914	1.48638	2.00323	2.4437
0.829011	0.921488	1.44086	2.95854
0.570605	0.60582	1.86653	1.21833
0.772846	1.25613	2.04329	1.14598
1.1061	1.10884	2.24093	4.43491
1.03458	1.13203	3.70068	1.46667
0.927954	0.717532	1.04116	2.83452
1.08646	0.888083	1.60526	3.22778
0.970461	2.45675	1.74873	0.803567
1.31982	0.829245	4.12903	1.01481
0.919308	0.887162	1.61419	3.36589
1.12244	0.893201	1.36201	1.24188
0.794901	1.37054	1.36596	0.996296
1.07523	1.35778	1.09567	1.28519
0.889337	0.770563	1.19355	1.25468
1.23343	1.28808	2.1163	1.39185
1.09594	1.07089	2.10599	2.61269
0.824535	0.983332	1.30645	3.59578
1.01805	1.51039	2.8638	1.39259
1.41571	0.792208	2.86672	2.00978
1.15706	2.14026	2.77419	1.46972
1.15757	1.61763	2.41197	2.97354
0.573487	2.08435	2.31336	2.95652
0.956638	2.3324	3.65417	0.990404
0.919849	0.779396	4.76231	2.23001
0.530924	1.28553	1.72811	1.64292
1.14096	1.26407	1.33724	1.18376
1.34294	2.42082	2.48675	2.01824
1.08863	1.65474	1.16452	1.35897
0.914719	0.836678	1.96408	1.72343
0.668463	0.803896	1.5901	1.7086
0.770986	0.646753	0.982488	1.40926
1.18818	0.690476	2.26755	1.52814
0.914832	1.07851	4.45022	2.56424
0.960267	1.05519	2.59053	2.13636
1.07637	1.04422	3.9986	3.67978
0.800916	1.99903	3.15891	2.55897
0.706052	1.07443	1.64409	1.12456
0.889374	1.81429	1.49309	0.94386
0.910045	1.21299	2.55108	1.54118
0.581223	1.56277	0.83871	1.19576
1.06506	1.29983	3.20771	2.68328
0.766159	1.9636	2.67014	1.97222
1.4333	0.749459	1.5416	1.54603
1.02926	1.42208	8.25538	3.16111
1.05718	1.21526	1.45235	2.00824
1.14121	1.16839	3.11013	1.2549
0.932837	0.769805	2.95825	1.52444
0.844532	2.42359	1.14076	1.74021
1.06448	0.844545	1.15207	1.42222
0.84438	0.777722	1.72258	1.67899
1.03675	1.45887	1.58065	2.12222
1.122	1.09307	2.42097	1.98718
1.07862	1.03688	2.17951	1.19114
0.753026	2.78588	2.29959	1.34806
0.631124	1.2977	3.42415	1.39087
1.85339	1.43603	2.42065	1.94146
1.18751	0.786997	1.07618	3.99953
0.772334	1.21571	1.31762	2.46058
0.828602	1.08594	1.83315	2.27778
1.18252	0.720779	1.89841	2.33775
1.06312	1.6158	2.0511	0.974306
0.960702	0.678571	1.94877	2.55243
1.0634	0.867695	0.620968	2.6929
1.06207	1.3	3.57568	1.28291
1.06187	1.18182	1.77419	0.963296
0.998933	1.61563	2.32454	1.34992
1.11641	1.46558	1.42832	2.80302
0.744353	0.907143	1.92962	1.61471
1.501	0.392496	3.29326	2.59239
0.886647	1.0974	1.29032	1.67921
0.809716	0.943182	1.39445	1.80937
0.996295	0.944232	1.49286	2.66331
1.13492	1.36039	0.746544	1.88013
1.34396	0.900779	0.57945	0.885185
0.655331	0.915686	1.26672	1.63148
1.02112	1.80295	1.62426	3.21359
0.800734	1.03493	3.60332	1.57639
0.557637	1.75352	3.1914	2.22275
0.943804	0.611688	1.82258	2.07653
0.822664	1.66883	2.3723	2.83671
0.887968	0.896785	0.885305	2.08962
0.890712	0.810761	2.99761	3.59877
0.977982	0.645218	2.16989	1.75
0.708934	1.6829	2.56855	1.61696
1.42206	1.79173	3.62033	2.20691
1.33031	1.52876	2.04478	3.56697
0.727305	1.50834	0.989247	0.827778
0.863112	1.30652	1.43548	1.22529
1.28026	1.64046	3.73118	3.44535
0.963787	1.85656	2.01423	1.28056
0.990689	1.35433	2.34012	4.37057
1.10941	1.82633	2.49006	2.39279
0.723343	1.35502	2.18366	0.938138
1.43915	1.76623	1.63208	2.02746
1.19457	2.48864	1.6907	2.55139
1.01821	2.07049	1.95242	2.44795
0.870605	0.6125	2.10549	2.99889
0.657061	1.19944	1.64516	2.17469
1.05006	1.86194	2.14337	2.89107
0.968362	1.23958	2.23522	1.57019
0.5317	1.15396	0.852535	0.971111
1.32997	1.66353	0.626728	1.99145
0.388329	1.40925	1.99194	1.11923
0.747038	2.04318	1.37366	3.21758
0.549823	0.530209	3.19648	4.1205
0.89033	1.2379	1.47143	2.165
0.550576	1.5118	2.20968	1.43778
1.14279	1.01443	1.87097	1.03129
0.665706	1.08279	0.898618	2.99104
0.935074	3.20037	1.36089	1.12089
1.95839	1.02204	2.82084	1.40727
1.29412	1.88013	2.81096	3.09323
0.75	2.03711	1.51555	2.01928
0.874207	1.31394	1.97294	1.23889
1.1537	0.830087	1.29032	1.76144
0.952289	1.17752	1.99474	1.61778
0.800913	1.08676	2.20803	2.86083
1.04769	1.40742	2.71261	2.40694
1.03211	1.20034	2.19355	1.63623
1.26307	0.809876	1.27957	2.30676
0.857076	1.22078	2.68643	0.979762
1.09702	0.878788	1.01075	2.43687
0.85697	1.91023	2.20142	1.54495
0.721817	1.23848	2.3037	3.53384
0.988101	1.97209	1	0.96734
0.914745	1.39769	2.32031	1.8163
0.508069	0.792857	1.84516	1.03651
1.27542	1.02171	2.49677	1.06204
0.948703	1.70356	2.0408	3.14478
0.940122	1.28451	3.22258	1.67112
1.01577	1.19599	3.35484	1.36952
1.12083	2.03458	1.67742	1.70926
1.23586	0.783377	1.92627	1.05299
0.836074	1.90693	2.95864	1.14537
1.00247	0.835322	3.33333	3.17866
1.29203	1.69156	1.84025	1.84092
0.820332	1.08442	2.04637	1.09347
1.17315	1.04122	3.153	1.06481
0.877041	0.827458	1.36175	1.82514
0.67478	0.983921	2.52886	1.28889
0.933688	0.785714	2.61905	1.07132
0.768596	2.41288	1.56855	2.44403
1.22429	1.1233	1.49642	3.23076
1.32913	1.55708	3.03579	1.77083
0.916487	1.24857	2.79724	1.19945
1.35368	1.45188	2.45574	1.58111
0.792507	0.741954	2.2043	1.32676
0.972909	2.33929	1.71804	2.19879
0.594952	0.899863	2.01613	2.15439
1.10921	1.03041	0.753456	2.62229
0.664059	1.49038	1.92774	1.28547
0.816517	1.14268	1.50344	2.61685
1.1513	1.29804	2.9993	4.57302
1.20912	1.12338	2.95058	2.96412
0.686039	3.7003	1.03226	3.40454
0.783957	1.9404	1.11575	1.03086
1.29374	0.910967	3.72043	3.99743
0.394092	1.44612	2.87806	1.7426
0.855908	2.24613	0.892473	2.21783
1.09702	0.896104	1.49133	2.27531
1.10967	0.812987	2.24194	0.955556
1.195	0.819805	1.86022	1.06111
0.853746	1.72018	1.86022	2.16667
0.975607	1.2596	2.14516	1.1291
0.577246	1.05703	3.88065	2.53632
1.02888	1.63683	1.24597	1.5075
1.02612	1.16486	1.09429	3.57374
0.958419	1.6583	1.03226	1.41421
0.386911	1.20183	1.68548	2.73253
0.861565	0.928166	3.25773	5.04276
0.969741	1.57067	1.0091	2.22778
0.827089	2.14806	4.04839	1.63215
0.669869	0.841558	1.17742	1.24615
1.71182	1.07727	3.30997	1.55926
0.724244	0.793506	3.73628	1.28966
0.918028	0.858225	1.2596	2.89176
0.951009	1.66048	2.52628	1.38027
0.701666	0.661747	3.94355	2.63021
1.26859	1.07161	1.79092	1.53069
0.674352	0.776552	1.78495	1.6
0.840298	1.41043	2.88665	1.1
1.14413	1.21962	1.58313	1.25349
1.25216	0.949134	2.9776	1.35364
1.11332	1.22254	1.81161	1.56667
0.583055	1.53597	1.38527	2.10328
1.23061	1.38249	2.82158	2.19715
1.24207	1.22605	1.33424	1.75556
1.12879	0.971861	2.04628	2.16641
1.34534	1.74532	3.46679	2.34495
1.41106	1.9129	2.34946	1.8405
0.962762	1.09071	2.7072	2.89259
1.19445	2.5757	1.76959	1.33694
0.992075	0.892991	3.59313	1.92941
1.03723	0.83857	2.49138	1.45127
0.744017	1.06025	1.95308	1.40833
1.41031	0.980664	0.989247	3.05384
0.773482	0.882054	1.66978	2.23964
0.699928	1.76912	3.28051	1.18167
0.715521	2.06519	1.16605	1.21339
0.936706	1.04367	2.18157	1.04611
0.986115	1.40085	1.08756	1.95631
1.59608	2.11753	3.27741	1.71997
1.40927	1.08364	3.74731	1.216
1.25712	1.52192	2.10187	1.49615
0.791931	0.792525	2.70251	2.96782
0.953347	1.1039	2.57742	3.48128
1.23674	1.26244	9.97811	2.20529
1.25216	0.887446	7.16774	1.34444
0.870317	1.38002	1.85044	1.29444
0.95317	1.77801	1.99788	1.39931
1.18577	1.60927	1.75392	1.56198
0.743715	1.06638	3.58442	1.70432
0.900576	0.558856	2.1174	3.61139
1.1557	1.49494	1.48015	1.68333
0.777378	1.02098	3.04785	1.3037
1.02075	1.34416	2.78427	2.12358
0.693289	1.34976	2.65233	1.23472
0.728626	1.4265	1.4371	2.05168
1.27522	0.960941	1.82204	1.2325
0.808718	0.738753	1.13604	2.34522
1.20529	0.915584	1.19662	1.72844
1.10135	1.057	2.41514	1.41026
0.677714	1.57364	1.68238	1.84167
0.851218	0.88961	1.33065	0.622222
0.979656	1.09926	2.56237	1.78633
0.543948	1.22571	1.66452	2.2267
1.41804	1.88508	2.66129	2.69456
0.928261	2.07012	2.83686	2.58416
0.859898	1.32213	1.21994	1.15988
1.03062	1.6	2.99538	1.07708
0.743294	0.774351	1.1106	0.977213
0.876783	1.343	3.3871	1.74512
1.4562	1.33185	1.56048	3.446
1.01858	1.28503	3.18239	1.15556
0.541787	0.664425	2.81669	1.47566
0.979979	1.8782	2.60573	0.942857
1.24582	1.01494	1.97966	1.87485
1.00993	1.20876	1.47312	1.64444
0.89142	0.817022	0.892473	3.37407
1.53918	1.26589	3.89862	2.72886
1.40634	1.13297	1.14695	1.26284
0.870317	1.11587	1.24597	1.12381
0.874128	1.24799	2	2.10694
0.709681	1.8835	2.48775	1.15725
0.965782	1.10636	1.0121	1.3195
0.735998	2.09519	3.02823	2.5038
0.846774	1.05731	1.95161	2.3037
0.932071	0.862299	1.82769	1.17343
1.13318	2.96286	2.70532	1.54164
1.48868	1.37643	2.26788	1.37841
1.12418	1.56609	1.10753	1.12444
1.24363	0.961039	1.35924	1.25111
0.757061	0.853896	2.24442	1.39602
1.03584	1.03876	1.6129	1.37778
1.21314	1.57778	1.93338	1.54949
0.839481	1.21832	1.32616	4.53056
1.052	0.642857	1.55	1.3768
0.930879	1.33457	1.81613	4.17905
1.13545	1.59091	1.18011	1.50643
0.715685	1.76264	1.97438	1.49861
0.965418	1.3474	0.791219	1.95083
1.03167	0.980519	1.12903	0.954167
0.706647	2.39043	1.6127	1.54875
0.619597	1.33	2.73718	2.87694
1.11724	1.01853	2.21659	1.41111
0.918017	0.716691	1.33487	3.38126
0.962302	1.65909	2.83969	3.83312
0.770212	1.51791	1.47138	2.3336
0.574988	0.635931	2.16743	1.6003
0.810759	1.58384	3.34295	1.03831
0.633105	0.945642	1.60394	1.73583
1.07659	0.99513	2.82102	1.89068
0.742555	1.48446	1.35215	1.8
0.975298	1.19819	0.997519	1.33862
1.10253	1.54422	1.2043	2.59263
1.00842	0.743654	2.0681	1.20536
0.982901	1.39482	1.32052	1.23
0.910983	0.461039	2.59241	3.14543
0.964577	0.668831	1.64516	3.20608
1.04513	0.942127	1.97041	1.70741
1.12777	1.3961	2.07661	3.0404
0.882445	0.692641	1.44355	1.80355
1.06193	1.44144	2.98557	2.32427
1.12557	0.712662	1.4129	1.00519
1.5245	2.1158	1.21114	2.54148
0.870221	1.5218	1.99173	1.79758
0.747929	1.55087	1.18817	2.29136
0.854594	1.07148	1.21774	4.19125
1.64669	0.579115	2.48405	1.04737
0.926861	1.32052	0.935484	1.4828
0.909622	0.9646	3.26853	1.0037
1.09536	1.15314	4.2821	1.53333
0.949568	1.85305	2.42051	2.9697
1.19779	1.47159	1.5629	1.4781
1.29587	1.2262	1.47312	1.80357
0.944627	1.11854	2.78003	1.81919
1.08144	1.51389	2.31804	1.53333
1.04497	1.89827	2.69355	1.08364
0.60861	0.935268	0.984572	1.5037
1.0736	1.17096	1.33333	1.13222
0.854251	0.79798	3.49014	5.81556
1.17507	1.49174	0.815412	2.04797
0.689828	0.91546	1.3629	3.56058
1.16241	1.88522	2.67194	1.80114
1.47753	0.902597	1.96774	2.80701
1.19308	0.500749	2.8629	3.06
1.45778	1.57851	5.38123	1.14253
1.09827	1.51122	1.53226	0.915278
0.915651	1.69234	1.9	0.818519
0.825316	1.2125	1.87267	1.17833
0.868876	1.09655	2.13158	1.37037
1.02703	0.956044	2.28961	1.60635
0.588066	1.0974	2.78136	1.25633
0.930355	1.82263	2.95773	1.01667
0.753919	1.27922	1.42115	1.32014
1.15274	1.26948	2.89779	2.43027
0.572565	1.13787	1.68184	2.88988
0.813554	1.25758	1.13293	2.01238
0.969535	1.55558	2.08266	1.16667
1.1487	1.21639	2.16018	2.93627
0.612963	1.70464	3.60264	2.20444
0.818562	0.684332	2.61331	2.12778
1.08059	2.59497	1.11235	0.97037
1.03995	1.31241	2.00242	1.44573
1.21174	0.991883	3.11339	1.23333
1.51424	1.1527	2.86203	3.02917
1.21902	0.757421	3.21832	1.47374
0.844218	1.66861	1.35023	2.08203
0.96822	1.42668	1.3871	2.51125
1.04186	3.70253	1.1362	2.15912
0.539385	1.17715	0.854839	2.14895
1.2219	1.13701	2.61953	1.91492
0.535383	1.35	1.89247	2.42646
0.94438	1.12338	2.78436	0.943889
0.897983	2.06366	4.91338	1.8125
1.27954	1.39048	2.15379	2.59841
0.957518	0.996753	1.50691	2.82344
0.920185	1.33387	1.84834	1.89588
1.25871	0.819805	1.45161	1.04921
1.19593	1.37088	3.56649	1.49542
0.740984	2.88679	3.02549	2.76492
1.22494	1.22078	2.04683	2.84074
0.918794	1.67665	1.24731	1.28704
0.724784	1.03968	2.84119	2.00614
0.925853	1.95154	1.54685	1.36703
0.878855	0.837662	2.95423	1.37429
0.64121	1.16683	2.5	1.1269
0.792769	0.998609	1.48956	1.26667
1.04586	1.0276	1.76061	2.52593
0.873502	1.5617	1.58065	3.72854
0.768256	1.09416	2.00154	2.86625
0.988638	1.30357	2.08404	1.21098
1.10356	0.724954	0.975806	1.90472
1.38422	1.7473	1.21505	1.56559
0.942956	1.07706	2.95853	1.78534
0.764409	1.31104	2.52688	2.45541
1.13009	2.50106	1.02304	3.5144
1.16941	1.11905	2.03127	0.948746
0.478386	1.06818	4.8894	1.65333
0.795389	1.40866	3.40645	1.46543
0.721422	1.27037	2.51521	1.13333
1.19813	2.65152	1.80108	2.68889
0.822286	0.93146	1.82366	2.05259
0.782224	1.63815	3.81016	1.98133
0.880109	0.77551	3.05707	1.2547
0.840011	1.80734	2.22097	1.93937
0.685879	1.19968	0.833931	2.61001
0.79683	0.751299	2.77982	2.19829
1.04227	1.33323	3.19713	2.60479
0.93213	1.56009	2.49824	2.07834
1.21955	1.76554	2.44551	2.44009
0.737665	1.15025	4.92927	3.06521
0.630469	0.949405	2.54839	1.98352
0.80631	0.82743	0.786022	3.7
0.745178	1.0104	1.04443	1.08622
0.971182	1.56072	3.29642	1.64358
0.804858	1.80976	3.59801	1.12319
0.989433	0.997042	3.3871	0.841975
0.921451	0.731602	1.35125	2.62593
0.906432	1.37613	1.32834	2.15556
0.795965	1.12987	2.87097	2.61098
1.17177	0.55303	0.764268	1.15479
1.19258	1.12017	1.92238	1.24609
1.77194	1.4974	1.22043	2.53421
0.827089	1.22033	1.49597	1.76364
0.995735	0.883117	1.0129	2.41863
2.20946	2.07252	2.12903	2.04074
1.14579	0.938661	2.32346	1.68679
0.955645	2.30997	1.54839	1.89216
1.56398	1.02226	1.67552	4.06534
0.959654	0.67009	0.953827	1.58966
0.991643	2.2956	1.30792	1.76548
0.877762	1.87479	3.47738	3.20972
0.78491	0.714286	3.60887	1.07429
0.858069	1.24443	2.33827	1.77967
0.69139	3.0974	2.44547	0.788889
1.0688	1.09879	3.34767	2.24434
0.756504	0.899351	3.63802	0.963111
1.04287	1.15296	2.28204	3.01179
0.67728	1.89624	2.60829	2.90696
1.42235	0.849838	1.69806	0.920468
1.08617	0.746753	2.54959	1.54758
1.10677	0.923259	2.43978	3.12527
1.23021	1.44147	3.39917	3.73902
0.700058	0.848485	0.895161	1.09506
1.02359	1.37754	3.40901	1.55864
1.02978	1.45943	2.32323	2.12774
0.771974	0.996244	1.74024	1.01389
0.946063	1.017	2.54032	1.86605
0.949087	1.36905	0.917051	2.88384
0.782997	0.725325	2.01843	3.46937
0.828203	1.38089	3.44567	2.03333
1.32421	1.38052	2.61111	1.10715
0.917195	2.20655	1.03226	2.87016
1.20696	1.41986	2.63518	1.11481
0.656302	0.836851	3.22531	1.02797
0.90618	0.989405	1.99194	0.722222
0.881934	1.82395	0.790323	2.33434
0.941392	1.50548	1.20235	2.11587
0.815734	1.44295	1.94428	1.18642
0.654703	1.06862	0.975806	1.59469
1.37269	0.981494	2.72434	1.52319
1.72229	0.750061	1.09032	2.31992
1.20916	0.62013	2.24328	2.44792
0.867339	1.68636	3.48925	4.18724
1.22349	0.918831	1	2.72089
0.622478	0.886604	2.91845	2.06111
0.900922	1.63892	2.75186	1.59385
0.895024	1.96533	3.25145	2.77622
1.14018	0.972403	2.58913	1.50159
1.04073	3.5186	1.40577	1.64198
1.15992	1.07984	2.96406	2.9063
0.909612	1.06694	2.91365	2.36724
1.16634	1.59156	3.26344	2.37341
1.19007	1.52857	1.07258	2.69497
1.29637	1.60065	3.58326	2.09948
0.915243	1.34897	3.31621	1.61543
1.05249	0.797403	2.76819	4.12032
0.934137	1.85248	2.32022	2.78078
1.26081	2.24675	1.75806	2.28491
0.893372	1.28525	1.28341	2.24786
1.32257	1.17236	3.19503	1.73333
1.22994	1.41477	2.9995	2.08283
0.769879	0.602679	1.21526	2.39841
0.879539	0.836445	2.36325	1.16173
1.01297	0.922504	1.19355	1.5586
0.894897	0.723377	2.218	3.18954
1.19349	1.03247	1.06452	2.6027
0.812508	2.17735	2.21774	1.62886
0.774256	0.974329	1.27419	1.525
0.986187	1.11223	1.60555	2.20989
0.950086	0.877468	1.40783	1.23248
0.930355	1.63757	2.56643	1.95214
0.788935	0.798701	1.09926	1.59778
0.958818	0.751771	3.06912	2.59566
0.668012	1.58486	1.91101	1.54141
0.804035	1.78985	1.00806	2.2
1.06592	1.35471	0.548387	2.4834
0.76513	1.89895	5.54194	1.97733
0.612261	0.952547	0.576037	1.78843
1.07541	1.46729	1.87097	2.44012
0.666094	1.14106	1.65323	2.31111
0.845533	1.24978	1.68238	2.92268
1.35447	2.35273	2.05279	2.18007
0.761527	0.746197	1.19816	2.31667
1.31672	0.913358	0.905707	2.19902
0.983748	0.818049	1.73226	1.34148
1.24915	2.32268	2.52043	1.86296
0.692973	1.0355	1.56989	1.19889
1.24157	1.1973	1.87231	1.62281
0.866259	1.24148	1.03795	1.801
0.99969	1.26369	1.71516	1.79713
0.871758	0.628459	2.58044	1.15351
1.06102	1.97501	1.3871	2.49157
0.947166	2.07532	0.724014	1.54762
0.901681	2.12909	2.46648	1.32102
0.983415	1.23332	1.82944	1.60595
1.33592	1.06926	1.95076	1.02328
0.597898	0.924675	1.62227	3.27009
1.39866	0.97718	1.19809	1.54646
0.690739	0.749809	2.14194	2.82919
1.06597	1.14561	0.849462	1.14795
0.770238	1.12127	1.87005	2.39273
0.587896	0.901122	2.84516	1.02222
1.03314	0.806194	1.78592	2.69899
0.911734	0.789823	1.85887	2.48092
0.643372	1.17591	1.27566	1.09365
1.04334	0.889315	0.951613	1.54561
0.781427	1.94596	1.19468	3.57678
1.27762	1.02597	1.50452	2.08801
0.822478	0.630748	1.60215	1.65185
1.17243	1.46738	1.15185	0.955556
1.1854	1.00649	2.01344	1.68889
1.28229	0.990759	2.54102	1.30556
0.53152	1.5059	1.79689	1.22016
1.01005	0.987679	2.29326	1.30873
1.40504	0.881543	1.54032	3.24877
1.05022	2.38929	2.04748	1.78717
0.981407	0.764069	2.6108	1.20719
1.07228	1.07792	2.59478	1.77824
1.03252	0.756494	2.23816	1.51389
0.850406	1.47844	2.22305	1.63824
0.85879	1.0259	2.1457	2.6188
1.18444	1.30519	1.41185	3.53312
1.00569	1.17828	4.40645	2.07141
1.15401	0.467532	3.49798	1.87516
0.68163	1.70632	2.74385	2.22
1.62618	1.0358	1.46544	1.18824
0.85879	1.67108	1.87455	1.72727
1.10469	1.43059	1.66667	3.62069
0.963281	1.32681	1.42483	2.40549
0.873383	2.99009	2.19355	1.57778
0.620252	0.846714	1.58525	2.08472
0.987636	0.947532	1.67256	0.566667
0.929917	1.95758	3.62903	3.2083
0.935298	1.25	3.94236	1.46918
0.950795	1.49979	1.90207	1.55556
1.18876	0.970121	1.21976	1.76528
0.948506	1.01515	1.7276	1.12913
0.901504	0.980519	2.48268	0.550347
1.0722	1.37338	3.1784	2.47467
1.90541	1.40866	2.87097	1.48294
1.03929	1.29067	3.5119	1.73086
1.09772	0.648352	2.15332	1.24444
1.27419	0.683589	3.6129	2.13377
1.15361	0.959268	1.67372	2.87451
0.961095	0.656025	2.00124	2.61739
1.1988	0.893344	4.24516	1.82619
0.829011	1.21222	1.04147	1.7835
1.50327	0.599026	1.69032	2.26556
0.674352	1.46846	2.23808	0.92037
0.992284	0.918277	2.56125	3.60025
0.992075	0.974847	1.27419	1.55812
0.706532	1.15844	3.12657	2.15
1.08486	1.50527	1.76959	2.341
0.527984	1.01193	1.54839	1.45432
1.39817	1.14286	1.69892	1.38148
0.640339	1.22732	2.45079	1.26746
0.933992	0.510766	1.73878	1.72478
1.1486	1.39821	3.42556	1.49167
0.983763	1.54772	1.67097	1.84052
0.853821	0.887583	2.32916	2.33187
1.44885	1.66647	2.46882	1.15875
0.889274	1.03474	1.96472	1.83064
1.11958	0.793103	2.28463	1.5363
1.1789	0.804785	1.88387	2.64318
0.939481	1.41888	2.23963	1.44444
0.887346	0.846104	2.14888	2.13938
0.783628	2.10383	2.31183	0.883092
1.01153	0.608586	1.99395	1.45607
1.30054	1.28368	0.933002	1.79715
1.0652	1.11132	1.49194	0.863248
1.05806	1.05806	2.12194	2.11164
1.3407	0.913379	0.516129	1.88264
0.871071	1.40538	1.37419	0.918519
1.21692	1.05357	1.60117	4.96852
0.59366	0.993948	0.806452	2.04514
1.19503	1.08437	1.48387	2.37389
0.766504	1.26705	1.41935	1.87037
0.931716	0.617771	2.52241	2.66667
0.765241	0.845336	1.24286	2.05277
0.687002	1.60714	1.84209	2.05237
1.44957	1.20961	1.1079	2.27686
0.618316	1.24901	2.51088	1.29571
0.932277	1.73923	1.24708	2.2
0.992964	1.12651	1.67339	1.07399
0.936888	1.1766	2.43548	2.01072
0.939827	1.29013	2.52786	1.00333
0.587176	2.12737	1.98387	2.13951
0.848883	2.00071	1.55081	1.72143
0.988614	0.882035	1.29922	2.60556
1.11939	1.28419	1.64865	1.95543
1.30375	1.13295	1.12442	1.48956
0.87269	0.875325	1.98925	1.99351
0.839769	1.46439	1.45161	1.3963
0.741194	1.22701	2.14286	1.24538
1.13654	1.01623	2.17776	1.98532
0.793365	1.03206	1.44575	1.21169
1.2106	0.77956	3.20873	0.861111
0.87202	1.84393	1.00717	0.655778
1.16282	0.415584	2.03333	1.44405
1.17891	1.25601	1.32258	0.871107
0.825443	1.13753	1.22903	1.4448
1.24978	1.44697	2.5121	1.9619
0.743104	1.81818	1.85484	1.175
0.923241	1.06331	2.92638	1.84456
1.17578	0.923779	1.14919	1.68981
0.704964	1.36776	1.18915	1.34487
0.881227	1.03084	1.96371	1.44508
0.960868	0.956876	1.81413	1.20984
0.670893	0.504329	3.76533	1.37907
1.06559	1.01186	2.40355	2.26887
0.995504	0.71769	2.49707	1.31389
1.03858	1.63881	2.81774	1.23796
1.08912	1.22403	1.84615	2.80215
0.710375	0.99001	2.77419	3.14473
0.887429	0.778087	0.707527	1.444
0.978762	1.76555	2.71774	1.05729
1.27513	1.46223	2.02744	0.8375
0.441563	0.95184	3.25056	1.09311
1.20256	1.31169	3.03555	1.21296
0.805365	1.1318	1.02581	2.315
0.846195	1.21591	2.26493	0.911538
0.911697	0.866498	1.19355	1.98359
1.14651	0.71388	0.572156	1.20278
0.705387	1.94356	1.70968	2.21494
0.711404	0.847403	3.26896	1.17157
0.495497	1.30037	2.331	1.99299
0.919609	0.914286	0.704301	0.810825
0.709605	0.941558	2.03943	1.61303
0.965504	1.23539	2.26497	2.65538
1.01024	1.70356	2.55664	1.84791
0.923919	1.09091	2.97696	1.5664
1.24131	0.855844	1.55484	1.02339
0.90351	1.12616	1.25806	1.06778
0.685879	1.41668	2.94839	2.27778
0.692775	1.00318	3.54509	2.51739
1.0419	2.40165	2.20341	1.01111
0.772883	0.812727	1.26825	2.25944
1.14813	0.785714	2.50264	1.23542
1.15562	0.962733	3.70968	1.56335
1.7659	1.45677	2.5285	0.955556
0.86577	0.574675	1.13105	2.65761
1.22423	1.70563	1.06989	1.39831
1.45605	1.52525	1.44516	1.0125
0.838219	0.915584	1.67226	1.56529
0.651975	0.639069	1.13978	0.971914
1.00134	1.24513	1.99707	1.72407
1.30183	1.5674	3.13025	0.98253
0.859339	1.65426	1.70019	1.77099
0.777017	1.06169	2.43063	1.94159
0.977018	1.62488	1.8376	1.55527
0.824441	1.04658	1.03226	2.2108
0.886134	1.06115	1.95806	0.675
0.962654	0.629542	2.75115	1.69812
0.853438	0.968123	1.89247	0.891111
1.33486	0.708514	2.30415	2.25929
0.89049	1.46158	1.58928	1.15861
1.12063	0.759178	1.53548	1.83585
0.794428	0.720779	1.95095	1.79038
0.753242	1.24513	3.28779	1.57608
0.702773	0.843885	1.69677	2.56448
0.836285	1.06118	1.02419	2.50139
0.634714	0.827922	2.527	1.18748
1.22882	1.53247	2.32764	2.05189
0.69027	1.19555	1.3957	1.05794
1.03833	0.606972	2.24805	0.705556
0.836863	1.02597	2.08697	1.89839
1.18492	1.0872	2.9956	2.48669
1.00799	1.59787	2.69334	1.06944
0.804601	0.888248	1.36045	0.494444
0.827428	1.30195	2.1828	1.22974
0.987832	0.929128	1.98771	2.26808
0.656026	0.917355	2.45161	0.831481
0.642913	1.49351	2.45341	1.26778
1.09166	0.842385	2.54839	1.32556
0.925232	2.01273	1.3129	1.29959
0.846254	1.20292	1.47419	2.06853
1.04083	0.694122	2.52933	0.922117
1.03977	0.649351	2.23573	2.23594
0.850144	0.522345	1.15054	0.938889
0.940534	1.80025	3.23041	1.24765
1.37349	0.77408	2.84874	1.28952
1.09306	1.42031	2.92087	1.50235
0.605187	2.11185	2.17939	1.43426
1.21037	1.06656	1.7475	1.05833
1.35224	1.15211	1.93548	1.82312
1.13521	1.29931	3.83431	1.88822
1.37773	2.32014	1.97849	0.970644
1.20876	1.27013	2.1129	1.37932
1.08313	1.46422	0.979263	1.95621
0.877522	1.01623	2.50806	2.28752
0.743124	1.49417	2.23607	2.1306
0.867715	0.96026	1.69727	1.56273
0.773055	0.903341	3.17563	1.14722
1.3957	0.533911	0.876344	1.49686
1.09039	1.02694	1.70699	1.09323
1.30548	0.554446	1.27419	2.17533
0.517662	1.82186	1.00968	1.31597
0.773633	0.730553	3.91563	2.04691
1.07889	1.34398	1.51613	2.36581
0.691939	1.71825	2.23387	1.17284
0.996314	0.746753	2.96702	1.68796
0.945965	1.7094	1.79487	1.02751
1.11527	1.10879	1.13262	0.948889
0.898511	0.74531	3.05588	1.06111
1.51592	1.11688	1.7788	1.45625
1.01101	1.82424	2.34029	1.61564
0.962741	0.921733	2.72581	1.83056
1.14006	1.3081	2.16129	1.343
0.555812	1.57581	1.40762	1.14127
0.892411	0.733766	1.79032	1.35
1.11718	1.72308	3.13268	1.00618
0.898362	1.62215	1.36559	0.975926
0.949087	0.864494	3.6129	1.49501
1.21943	1.01577	2.46505	1.05453
1.25759	0.827781	0.867742	1.32348
1.11073	0.903463	1.34604	2.04198
0.913311	1.07539	1.81973	1.10323
0.98689	1.29149	2.79317	1.27311
1.15904	1.35343	1.67241	1.22578
0.642208	1.98827	2.76999	1.03522
0.805939	0.830049	1.72486	1.13235
0.581556	1.32693	1.17097	2.93902
1.14772	1.20698	1.50706	1.0537
1.39984	2.67053	2.16337	1.40278
0.940922	0.849533	2.63575	2.08395
0.969741	0.938312	1.02722	3.65266
0.841883	1.51818	1.26421	0.86881
0.596542	0.865204	0.645161	0.933333
0.478386	0.907433	1.27419	1.75694
1.28057	1.80379	2.07583	1.32968
1.12896	0.36901	2.14464	1.88256
0.998112	1.49627	1.22043	1.28542
1.32119	0.731602	2.95338	1.08667
1.05115	1.11005	2.75246	1.73463
1.64862	1.11039	2.61674	1.17762
1.23725	2.54788	1.04227	0.818272
0.67179	1.26434	2.21121	0.771795
1.14409	0.82672	1.70447	1.20734
1.2235	1.39172	1.2436	1.10085
0.542295	1.50747	2.87076	1.68436
0.729107	0.742267	1.65899	1.53889
0.838797	2.26652	1.64516	1.2866
0.644813	0.539185	2.12725	1.40217
1.36698	1.2722	1.18433	1.236
0.690202	0.727273	2.59379	1.18403
0.669452	1.01883	2.24368	2.18095
0.597777	0.662479	1.69355	0.951533
0.847646	1.09416	1.79032	0.820833
0.622659	0.597021	1.80765	2.03981
0.91826	0.809524	1.79355	1.58181
1.09177	0.741883	1.77419	1.32361
0.735831	1.41558	2.02419	1.89928
0.899904	1.46266	1.67212	1.55325
1.11965	1.0729	1.15387	0.897531
3.54594	0.580808	2.23706	1.53551
0.798349	1.02318	2.07885	1.2641
1.22616	0.949211	1.45012	1.52717
0.849622	2.2371	2.02823	1.35389
0.684225	0.717532	2.16449	1.20833
0.857807	1.20563	2.56774	1.3422
0.67219	1.42656	1.76498	1.12871
1.11762	1.78816	0.881154	0.966667
0.929528	2.76661	2.98025	1.55556
1.31412	0.968322	2.83559	2.70623
1.09668	1.27716	3.4097	0.834325
1.19829	1.38149	2.51165	1.80961
0.96257	0.905438	1.51266	1.50704
0.943004	1.21775	2.26327	1.61227
1.0797	0.907592	1.77419	1.68788
1.79447	0.467532	1.56129	0.736111
0.746791	0.562771	1.60531	0.765833
1.21536	0.934161	2.64286	1.47727
0.838989	1.02428	3.1129	0.734259
1.17507	1.31981	4.52419	2.70748
1.13012	1.46476	1.54224	1.45352
1.02254	1.75898	2.07814	1.73925
2.35943	1.30782	2.5672	1.05264
0.748662	1.12446	1.89452	1.88926
0.99152	2.01398	1.91234	1.42589
1.10231	1.33882	1.96774	1.09167
1.03253	0.594156	2.32286	0.749206
0.806473	0.770455	2.87836	0.605556
1.02251	0.711688	2.73339	1.54167
0.635971	0.632484	3.17231	1.87713
0.777778	0.844763	1.21806	0.623545
1.01627	0.603896	2.17536	1.06667
1.08742	1.02223	1.94048	1.19611
1.07264	1.41683	2.64626	1.13077
0.670029	1.53247	1.09677	1.96536
1.68933	1.67339	3.47031	1.47609
1.04882	0.87987	0.670251	0.997222
0.966425	2.528	1.69355	1.24315
1.19588	0.902371	2	0.855556
0.631124	0.920813	2.4124	0.918676
0.710205	1.271	1.37788	1.15348
1.13732	1.31999	2.00346	1.18889
1.30361	0.877967	2.4239	2.15397
1.28359	1.32421	2.07897	1.14203
0.914046	1.59878	1.58065	1.20556
0.782009	1	0.8	1.225
1.17245	1.45199	1.67339	2.51193
1.41504	0.49375	3.8086	1.08333
1.58007	0.754067	2.5129	2.51447
1.20797	0.996591	1.69287	1.37738
0.826678	0.621228	2.5749	1.97715
0.721542	0.791032	2.73628	1.33111
0.802079	1.83598	5.21129	2.14294
1.00139	1.40402	1.88625	1.47222
0.992632	1.69394	1.82089	0.847778
0.954141	1.02662	3.20161	3.15372
1.2047	0.60303	2.56183	0.882236
1.11142	1.39006	0.984946	1.29259
1.04867	1.50216	3.20868	1.24316
0.806837	1.10606	0.898618	1.50822
1.36578	0.947745	4.35945	1.9572
1.30173	1.47424	1.96015	1.09
0.957743	0.363636	1.05671	1.41948
0.736922	0.86402	1.83667	1.50464
1.02552	1.21924	2.62769	1.6012
0.823595	0.944091	2.85879	1.31356
1.20399	0.821261	1.51548	1.27889
0.808116	0.939558	0.935484	1.3035
0.991516	0.896496	2.66088	1.12623
1.28641	1.1803	1.27616	1.35719
1.47622	1.09934	2.44921	1.27647
1.22574	0.943957	2.32719	1.07222
1.05107	1.99074	2.47581	3.11622
0.806459	1.07717	1.03226	1.75278
1.27501	0.975862	2.68356	1.21389
1.28612	1.08967	1.05425	1.35944
0.656484	1.8298	2.02903	1.15879
1.354	0.892857	1.81797	1.35191
0.809478	0.814613	1.97984	1.22389
0.867147	1.76872	1.66878	1.18992
1.0782	0.973587	1.02218	1.46173
1.3837	1.26913	3.08034	1.26901
1.14094	1.47121	3.28608	0.946429
1.0951	0.723636	2.83871	0.825926
1.28564	0.86371	1.47581	0.895833
1.11918	1.47612	4.36537	1.40654
0.76561	1.45101	2.45597	1.29398
0.645646	1.64318	1.91786	1.74159
0.978883	1.15572	1.46894	1.20298
0.903446	1.07478	1.97581	1.00051
1.04496	0.968939	2.72043	2.05544
0.626595	1.04336	3.4035	0.963889
0.754163	1.26608	2.53595	1.20278
0.808646	0.760526	1.51233	1.05366
0.973625	1.61733	1.46356	1.46931
1.18509	1	1.89642	1.93455
1.20831	1.20056	1.87097	2.51852
1.05467	0.71153	3.51382	1.25931
1.14086	0.893939	3.15962	1.03165
1.0185	0.656098	1.42294	1.25004
0.895417	1.02486	1.80637	0.931609
1.17042	0.821168	1.36804	0.809259
0.535223	0.863182	2.71356	0.828704
1.07027	1.11076	2.2566	1.33992
1.26137	0.835101	1.27957	1.60455
1.0669	1.05038	2.31452	0.45
0.871536	0.738636	1.78495	1.12677
0.773955	1.15088	2.77245	1.09444
0.718638	0.990458	2.64516	1.55977
0.619597	0.943922	1.96188	0.760185
0.861822	0.897222	0.767281	2.11613
0.750371	1.52294	3.8894	1.78687
0.817603	1.3837	3.08817	1.26032
1.06813	0.916529	1.30792	1.12139
1.15359	1.04901	2.01489	1.02581
1.82316	1.51049	2.3527	1.00058
0.963359	1.20303	0.889401	1.59891
0.897958	0.863737	1.58065	1.03333
1.31873	0.757273	1.59922	3.07858
1.23759	0.946172	3.14113	1.72322
0.59281	1.23027	2.13978	1.25499
0.948305	1.12134	1.20099	1.61111
0.566643	1.18684	2.18728	2.22756
0.771403	0.659366	2.02304	1.46699
1.60903	0.547218	1.70323	1.05278
0.622478	0.509917	2.30469	1.56713
0.820882	0.721901	1.08009	1.15065
0.973103	1.65737	3.96971	0.883626
0.906594	0.77972	1.05645	1.37248
0.94711	0.772727	2.31004	1.41623
1.08858	0.492532	1.61505	1.31202
1.03423	1.20227	2.49925	1.75447
1.01786	1.49618	4.14401	1.41778
1.24624	2.2958	0.872468	1.35862
2.12986	1.17614	2.61969	1.47222
0.944971	0.915909	1.81419	2.60144
0.962875	1.5251	2.01075	1.32694
1.07335	1.12607	3.51075	1.59367
0.898914	0.86405	2.32258	1.14444
0.869652	0.751515	3	0.790278
1.08244	0.472727	2.50968	1.52527
0.703631	1.07397	2.16129	1.68845
1.0449	1.09532	1.86104	1.62143
0.793148	0.968182	1.29701	1.13545
1.14385	0.290909	2.80222	1.0784
0.947476	1.02505	1.44839	1.7479
1.2	0.642905	1.59439	1.43869
0.792827	1.05809	2.22906	1.06208
0.92715	0.917433	2.4238	1.70894
0.859774	0.902686	1.5623	0.828205
1.59218	0.555992	5.96371	0.944444
1.09687	1.6867	1.01873	1.05571
1.14879	1.19422	1.85968	1.53636
0.975264	2.94286	1.22043	1.32684
0.925533	1.34481	1.21994	1.66145
0.752895	1.21415	1.76959	1.21686
1.4692	0.897934	3.21223	1.308
1.0075	1.0803	1.53226	1.28981
1.0667	1.1204	1.31452	1.51905
0.705749	1.17532	2.13098	1.35556
1.5045	1.6625	0.814516	1.28376
0.940618	1.16273	2.35207	3.28655
1.1268	0.86	1.53848	1.16627
1.1286	0.97	1.41551	1.59722
1.13421	1.10848	2.31541	1.4331
1.04019	1.20637	3.2765	1.47569
1.17015	1.41916	2.32302	1.26953
1.12139	1.22141	0.725806	0.861333
1.35099	0.917703	2.53598	1.46457
0.757401	0.833971	0.790323	1.42622
1.27763	1.48785	1.83871	1.21587
1.1202	0.685702	1.46841	0.772797
1.29014	0.586364	1.43856	1.92111
0.675163	0.691126	1.10129	1.14632
0.818665	0.573354	2.80048	1.49732
0.735282	0.607955	2.8882	1.11944
1.02932	0.521212	2.20968	1.23718
0.927467	1.24045	2.3629	1.0216
1.33457	1.13561	1.79773	1.16892
1.05935	1.32644	1.59231	1.25037
1.02603	0.672078	1.64839	1.06543
1.21943	1.15901	2.60161	1.00174
1.00173	1.31761	3.93238	2.4142
0.919456	0.730114	1.83213	1.42726
1.12168	0.971212	2.52357	1.82608
0.876302	0.95	3.97922	1.08889
1.32565	0.73961	2.12903	1.19873
0.946686	0.727951	2.14393	2.76778
0.831497	0.78549	1.82003	1.2064
0.837244	1.24523	0.832258	1.64369
0.608429	0.811364	2.6039	1.39709
1.23445	1.0375	3.8827	2.16441
1.18504	1.05946	1.03226	1.1213
1.59372	0.926738	2.42966	1.02222
0.863932	0.507045	4.18996	1.27569
0.93606	1.21283	5.44355	0.683951
1.41602	0.492541	2.68111	1.71774
1.16645	1.36818	3.2888	1.08299
0.829061	0.892022	2.4552	1.59959
1.36529	1.26035	2.72258	1.15073
0.756394	0.668939	1.4552	1.23939
1.01792	1.01065	3.36022	0.916349
1.0964	1.26718	3.28784	0.874444
1.26112	1.0075	2.20782	2.17488
1.1406	0.900699	2.61071	1.89418
0.805187	0.804429	2.41326	1.78567
1.71516	0.648864	2.96891	1.00556
0.993786	1.40842	1.91248	1.73029
1.2163	0.885526	1.93917	1.39167
1.03001	0.944074	1.18952	1.41528
1.18186	1.55127	0.5	1.25139
0.882375	0.738278	1.57796	0.813675
1.19391	0.42399	1.75	1.22591
1.69395	1.11232	0.582949	0.960833
1.06926	1.41111	3.21909	1.66248
1.05023	0.831327	1.54916	1.05278
0.895019	1.55163	2.22581	1.0963
0.519967	1.0487	1.91039	1.36086
0.850144	1.07506	2.27057	1.15333
1.05965	0.988485	1.73417	1.02778
0.958373	1.03646	1.74654	2.01122
1.04342	0.861884	1.57537	1.13163
1.0861	0.841193	1.901	1.61667
0.996371	0.848848	1.03226	1.04653
0.804323	0.35303	3.40275	1.51273
0.98681	0.785455	2.50861	1.92966
1.26983	1.04634	1.14586	1.08811
0.767851	0.732848	1.48029	1.75556
0.929517	1.125	2.54384	1.33285
0.579929	1.21342	2.70108	0.736111
0.779428	0.975	1.93947	1.44833
0.843529	1.12273	1.43871	1.62718
1.2514	0.823967	3.22581	1.13492
0.892754	1.22179	2.63025	1.45309
1.00384	0.650699	1.50645	1.94259
1.1838	0.803737	2.68395	1.37222
0.898489	1.03353	1.28817	3.91827
0.87795	1.36066	1	1.36104
0.775024	1.07977	2.41349	1.37799
0.943652	1.436	1.17657	1.31895
1.41758	0.937626	2.09772	1.2162
1.61436	1.50586	1.72739	0.994444
1.00114	1.64068	1.73488	1.93299
0.774856	0.813636	1.15633	1.06205
0.95914	0.701732	2.37814	1.26318
1.05637	0.797677	1.97067	1.12039
1.02518	0.815909	3.09677	1.00212
1.10086	1.21024	2.29633	0.905
0.740459	1.2927	1.25	2.62565
0.680856	1.61511	1.04249	2.46505
1.4761	1.63182	1.65355	1.30556
1.1329	1.08561	2.00526	1.92053
0.946575	0.893823	2.29111	1.23853
0.726011	0.85697	1.01434	1.47158
0.743516	0.923427	2.11521	1.25647
0.717626	1.31633	1.15054	0.747531
0.792507	0.577033	1.48963	0.938889
0.596462	1.12118	2.99835	0.874177
[truncated: 9,564 more rows]

## Sheet: Feuil1
only Cyto	F-BAR	F-BAR-x	FCHo2	FCHo2 - PS
1.11462	1	64.405	9.20494	0.178602
2.54792	1.36425	26.1989	12.4495	0.090721
1.35906	3.41078	23.2222	5.89191	0.105292
2.71246	2.04951	49.8303	10.7603	0.178712
2.52657	1.64935	23.8925	4.84512	0.0842199
1.37529	1.7987	66.7545	5.63644	0.163332
1.1462	1.26948	25.6989	9.0119	0.101579
2.01072	1.72196	34.1097	12.1771	0.196127
1.02924	1.36364	27.7143	6.95033	0.253326
2.72775	1.47662	74.8822	6.52357	0.0882585
0.976608	3.08776	31.5015	7.98936	0.0780142
1.10283	1.71688	21.3548	10.3672	0.0886525
1.05764	1.25108	25.3508	4.35802	0.0789007
2.66733	1.38068	44.2239	11.2411	0.0784082
1.97883	2.42878	73.1861	4.30864	0.15665
1.26316	1.51995	26.3082	4.87066	0.100824
3.48839	2.86683	53.4778	6.31252	0.105454
2.86682	2.70782	25.1835	7.97009	0.112669
1.32749	2.76704	27.3625	10.5781	0.118931
1.42203	1.52696	22.3387	9.48703	0.085328
1.1384	2.58923	27.7811	4.98481	0.0884161
1.18656	2.80742	51.2915	6.31397	0.264879
1.50256	2.61656	21.9032	7.45785	0.108245
1.33408	2.4155	23.7581	5.03652	0.119875
1.75736	2.42726	49.0773	8.07187	0.101225
3.60618	2.51355	52.5721	5.91317	0.221702
1.10346	3.53557	22.2581	5.56379	0.106494
1.08041	2.01552	23.1882	8.29071	0.0744681
1.66001	2.54936	26.3703	4.9528	0.0916076
2.93494	1.2557	42.6357	5.09664	0.338013
1.08772	1.58516	23.7771	8.30074	0.0902285
2.13846	3.2067	22.9247	4.38683	0.104667
0.976608	1.53383	26.1875	4.83171	0.148227
3.54029	1.68077	53.8886	5.52795	0.0780142
1.43516	3.27262	29.3804	7.48883	0.10864
1.13367	1.6505	22.2968	6.93536	0.0833333
1.14968	1.93608	37.6554	4.37723	0.11578
1.33491	1.82421	46.4182	5.34799	0.107649
1.17903	1.22078	33.7762	6.32046	0.10489
1.10976	1.58715	23.6959	4.94386	0.0953714
1.1417	1.19481	22.629	12.8266	0.113032
2.08978	1.24892	24.0548	4.72608	0.0799842
1.18129	2.17951	22.1452	9.18579	0.0744681
1.12812	1.24351	21.6935	6.28686	0.0797872
1.28477	1.44118	23.3441	7.49773	0.0762411
1.03801	1.53848	22.1226	8.01498	0.0762411
1.07096	2.29144	25.4495	5.65679	0.0827423
2.381	2.55765	26.8093	7.88857	0.133485
1.01754	1.56277	33.5781	10.8411	0.0894405
1.64365	2.07938	24.7774	9.77721	0.0797872
4.9213	1.80342	21.3226	5.17845	0.29852
1.79748	3.18906	36.8473	6.2552	0.204402
1.52193	1.26677	30.4701	4.4465	0.0744681
1.42413	1.93365	29.5023	4.68049	0.108831
1.25403	2.08631	23.8613	4.67141	0.0861407
1.51233	2.04958	26.0588	5.30952	0.0797872
1.56113	2.63641	26.5932	5.23214	0.174025
1.07719	2.369	27.776	6.86493	0.289806
1.99911	1.89847	52.0382	6.36904	0.135329
1.27187	1.24675	45.3768	6.05048	0.234591
1.28513	1.30224	39.0803	5.22778	0.101135
1.90186	2.32692	27.1055	6.84152	0.0884658
2.13825	2.40994	27.3011	9.66353	0.124847
0.976608	1.90282	25.4392	4.95445	0.0744681
1.62365	2.06197	27.9106	5.63533	0.345811
1.366	2.59897	66.5425	5.19586	0.099734
1.72913	3.23091	24.2088	4.82049	0.0785208
1.1318	1.38262	22.3871	4.35185	0.0762411
1.27193	3.2569	24.1491	8.50464	0.0915231
1.47041	3.33854	28.8375	6.04141	0.0935713
1.34273	1.2711	32.1284	12.278	0.117768
1.27764	1.73961	23.2995	6.3689	0.125369
1.41806	1.48995	26.7016	11.0384	0.0744681
1.05556	1.65844	36.817	5.62407	0.0831021
1.03655	1.25714	21.9548	10.376	0.0861975
2.10867	1.52328	21.8065	12.2219	0.176194
1.17721	1.73325	23.4556	4.86261	0.212365
1.11749	1.91299	26.0866	7.11963	0.205167
1.11891	1.6166	21.629	6.61979	0.0744681
2.05642	1.73154	25.5213	12.6688	0.0744681
1.43281	3.02167	25.0161	5.38753	0.207943
1.34609	1.7482	52.5182	6.46468	0.0930851
1.30691	1.64815	81.701	4.74747	0.0744681
1.30409	1.35714	28.3783	10.5609	0.0975789
2.44828	1.74978	24.3961	5.65586	0.0775076
2.00665	1.24805	22.9903	6.01524	0.0829787
1.30821	1.56468	21.5484	13.1054	0.08308
1.41944	1.56175	22.0726	4.84324	0.0756501
2.53117	1.23377	23.7581	4.93233	0.256286
1.649	1.45682	21.6129	6.08076	0.10485
2.1574	1.37562	28.1954	4.6845	0.341225
1.3289	2.66689	25.7161	4.47942	0.158524
1.24224	1.43276	29.1403	4.38957	0.0756501
1.07456	1.24351	23.5871	10.1155	0.124631
1.19363	3.02045	38.2041	5.01743	0.282197
1.97421	1.21558	22.3817	6.93255	0.13659
1.64635	1.37936	64.8987	4.29012	0.0960284
3.32787	2.49113	26.324	5.21753	0.118794
1.08232	2.55759	23.3737	4.76263	0.085613
1.03509	1.38194	58.2269	9.57131	0.0863959
1.79154	1.2619	30.7996	9.68863	0.0833333
1.11988	1.51449	38.5384	4.30864	0.130411
1.25427	1.2013	21.871	6.46284	0.104787
2.08748	2.23871	41.0775	7.62484	0.0994221
1.6229	1.71304	22.8157	4.38833	0.407639
3.3756	1.39286	27.4173	4.2963	0.109401
1.09779	3.15013	45.3913	4.7758	0.0762411
1.28054	1.26104	30.8094	5.50714	0.100021
1.07992	1.34091	36.4749	4.578	0.0904255
1.19236	1.18831	39.4437	4.3251	0.0894869
1.27778	2.1008	38.4946	4.43827	0.128907
1.05556	1.59045	64.0842	4.35391	0.0914894
1.49678	1.89455	26.4573	4.33333	0.092435
1.6143	1.59465	22.071	12.2025	0.0815603
1.9318	1.5403	34.8127	9.66232	0.106929
1.31752	2.77938	48.9679	5.96002	0.174917
1.72794	2.9677	38.8253	4.75443	0.19601
1.03704	2.71006	21.5484	5.86745	0.225671
1.26927	1.20779	25.1037	4.92463	0.148827
1.45009	1.5385	40.0344	4.64515	0.134016
1.63289	1.34357	26.8878	12.0052	0.453806
0.982456	1.51782	24.4774	6.57314	0.106099
2.49294	2.00632	24.9875	4.69208	0.131273
1.72341	1.99281	26.5997	5.06235	0.462353
1.65298	1.32816	54.1906	4.31276	0.122087
1.46538	1.2013	23.6158	5.38591	0.1694
2.86497	1.3644	29.2067	4.25926	0.231897
1.9821	3.38347	30.5645	9.96805	0.188304
1.34678	1.68086	33.4211	4.8175	0.188693
3.06352	1.5744	21.9677	4.37809	0.25761
1.51519	2.44153	32.1101	9.0854	0.0994994
1.97123	1.51791	31.7969	7.23633	0.0744681
1.1561	1.42941	22.8952	11.0711	0.085613
1.33578	2.66733	50.4562	6.82645	0.10187
1.19006	1.29457	28.8503	4.4709	0.106051
0.988304	2.91364	29.3698	9.6466	0.0744681
1.15567	1.87415	44.2659	8.41044	0.0990881
1.43981	1.41221	27.8355	10.6228	0.109929
1.52033	2.07584	28.5689	6.28935	0.244185
1.19237	1.32236	24.9548	6.34221	0.102116
1.11201	2.56116	23.1147	4.49136	0.0844616
1.27018	2.30811	48.9662	7.86958	0.0833333
1.07815	1.42654	28.2103	4.2716	0.081117
1.8336	1.96503	36.6156	6.99799	0.0994774
1.91597	1.47416	21.8065	8.39321	0.118597
1.22222	1.421	31.4516	4.42963	0.178854
1.02924	1.5522	31.6603	5.31774	0.192827
0.991228	1.29383	21.1935	8.23509	0.221201
1.15678	1.79991	31.4888	5.02301	0.104671
2.958	1.39042	47.8548	10.0947	0.104728
3.01521	1.69206	22.2473	6.83247	0.172245
1.33117	1.94875	51.0484	10.2189	0.325798
1.34175	1.27778	27.9588	5.89265	0.175644
1.23705	1.9051	22.8756	11.6483	0.230959
1.04261	1.18669	38.3568	5.92139	0.256744
1.126	3.05529	41.5453	4.87654	0.110116
1.81914	1.35498	21.5161	8.17324	0.235287
2.0979	1.33707	26.0735	7.56478	0.0845745
1.53314	1.25325	41.1129	10.0344	0.114964
1.84172	1.65642	31.4764	7.40612	0.0928553
1.22249	1.80372	23.4946	4.35802	0.221806
1.01316	1.52319	33.736	8.29709	0.0803782
2.24407	1.37662	22.5871	4.32099	0.28764
2.31302	1.96347	22.4677	7.90812	0.195891
1.45545	1.40219	65.0045	8.87397	0.0881797
1.15826	1.2013	55.1539	4.2716	0.0768322
1.05316	1.50545	28.1419	6.53292	0.0957447
1.34566	1.44241	47.3186	6.92323	0.130974
1.00877	1.49915	33.9505	4.60905	0.0963705
3.3495	1.27644	25.4735	6.12946	0.0843972
1.26316	1.18182	25.7883	4.4716	0.103494
1.86285	1.93951	25.3254	6.89698	0.110113
0.994152	1.93955	60.4248	11.7984	0.0839243
1.34863	1.64756	22.2016	14.5551	0.0943041
1.38037	1.54545	27.4452	13.7477	0.195136
1.73168	2.19432	30.6331	4.88786	0.0950999
3.68884	1.82394	28.2026	7.94967	0.093033
1.88537	1.27706	24.3029	4.93827	0.248449
1.96908	1.91238	22.1532	5.09513	0.109929
1.08382	2.31688	25.3414	12.6189	0.215161
1.01871	2.09438	24.4871	10.1328	0.0780142
1.24258	1.71111	47.1323	4.37531	0.164031
1.15314	1.19697	23.0179	6.5327	0.0929078
1.18926	2.16783	21.5645	4.42857	0.0909321
2.75682	3.77396	46.2142	6.91749	0.0744681
1.56033	1.60417	53.062	13.0346	0.11174
1.30653	1.31704	49.3885	4.38272	0.086052
1.16881	1.64688	48.9446	4.63519	0.0744681
1.30088	1.62302	34.9743	8.41869	0.115517
2.50475	3.34551	22.4355	7.19959	0.196694
1.06758	1.25679	23.7302	5.72236	0.0775709
1.40468	1.35256	29.9593	9.1862	0.129661
1.60274	1.38725	86.2274	5.34659	0.142076
1.6758	1.23701	35.7408	9.24794	0.0866824
1.33153	1.24838	37.6327	13.6456	0.0762411
1.32074	2.97643	32.2956	4.38889	0.103494
1.69644	1.65551	32.6899	6.60427	0.0995991
1.67475	1.21707	25.491	4.58613	0.086052
1.19006	1.27143	50.8753	5.73297	0.177706
1.16491	2.0749	50.8381	4.96779	0.0934569
1.2345	1.83878	28.1187	10.074	0.112039
1.97746	1.43185	25.9734	9.1136	0.0811663
1.04483	1.3634	59.6282	5.03598	0.232157
1.04459	1.53257	24.6714	4.48854	0.0785208
1.06539	1.73021	56.7783	5.00882	0.0791962
1.01462	2.01558	26.1333	5.55081	0.0883301
1.53545	2.08925	60.1715	7.95387	0.0762411
1.95688	1.54859	75.8281	5.806	0.0804964
1.69159	1.32092	38.1385	12.7612	0.098646
1.32164	1.42362	22.2839	7.41148	0.0819543
1.2198	1.33766	22.2097	5.93154	0.0799842
1.47861	1.74694	28.6156	8.67277	0.246688
1.2506	2.73706	22.7005	8.78198	0.0904255
1.06433	2.21155	26.3985	5.51072	0.174097
1.42139	2.11888	47.147	6.6272	0.0831363
1.52678	2.13618	26.328	6.33813	0.116096
2.23921	1.8676	23.7957	9.89733	0.231037
1.79612	1.90121	56.2049	4.31481	0.117476
1.35161	1.82959	24.4516	5.72418	0.0994016
1.43746	1.56449	24.255	8.62802	0.119
1.11852	1.4419	32.9606	10.178	0.0829787
1.00975	3.85936	31.2436	4.6746	0.0810875
2.25423	2.68067	27.8375	10.9021	0.15901
2.04039	1.1961	28.0069	10.5987	0.0744681
1.60117	1.58231	25.6037	5.18661	0.102837
1.25244	1.51349	24.7177	12.2193	0.0912654
2.68862	1.23419	57.7792	11.5745	0.0859247
2.07818	1.22208	25.3598	12.001	0.106955
1.77956	1.6668	35.186	10.6759	0.144976
2.98173	2.76607	43.6115	10.0602	0.0823483
1.6525	1.53949	29.8053	8.55933	0.0762411
2.37212	1.76989	38.4656	6.75848	0.127387
1.2152	2.50937	26.8177	4.8145	0.095088
1.06015	2.09512	23.2151	9.89912	0.185908
1.54032	2.85926	39.8322	4.38889	0.0744681
1.02534	1.45119	22	7.7237	0.122891
3.06299	2.85145	21.4839	4.68871	0.248721
1.25978	1.76916	27.3452	10.5799	0.0897723
0.988304	3.15239	31.3759	4.98951	0.120947
1.15267	1.47619	21.5	5.76035	0.150971
2.76371	1.2518	24.7609	5.88001	0.0768322
1.01608	1.27622	22.9637	7.39017	0.0780142
1.00195	1.37879	26.5391	4.38801	0.0744681
2.34615	1.50951	37.1244	6.76328	0.0931836
2.73583	2.53468	27.0018	5.57053	0.183596
1.03801	2.32153	28.2269	6.74138	0.0801418
1.75494	1.19968	21.7634	5.59005	0.0910703
1.25661	1.45617	23.5806	9.93176	0.0899189
1.12824	1.22078	42.3505	5.7519	0.104863
0.997076	1.30823	32.9224	4.82651	0.141284
1.45426	1.19805	26.7865	9.45344	0.120376
3.55857	1.20779	22.1935	4.63304	0.330096
2.02484	2.37531	29.2154	4.64957	0.183412
0.994152	1.28423	48.1599	4.94418	0.183982
1.36557	1.34894	28.7757	5.603	0.0968794
1.75242	1.3735	27.0417	8.1134	0.0888137
2.14102	2.38917	29.1281	10.8455	0.112858
1.40296	2.94529	45.0443	7.67331	0.151763
2	1.64686	24.2183	6.79293	0.161016
1.88279	1.96186	55.1648	5.47271	0.0780142
1.67891	1.27662	31.0826	5.79046	0.17234
1.4962	1.34372	27.0932	5.31233	0.126568
1.22928	2.60078	21.6774	5.28986	0.128348
1.41453	1.25584	22.6774	10.7032	0.104694
1.1462	2.62025	22.1613	4.84822	0.0776596
1.17589	1.69817	21.8065	10.0597	0.0821513
2.08176	2.03764	49.6048	6.20855	0.104277
1.39165	1.80235	26.7204	5.03065	0.126832
1.16784	1.25406	33.3306	17.244	0.143166
1.58041	3.34885	22.6129	6.62991	0.0886525
1.07921	1.3372	23.3091	7.54893	0.0815603
1.09162	1.79634	21.828	4.32099	0.146611
1.64309	2.74201	59.6618	4.56944	0.152416
2.6193	2.00331	61.4467	5.02256	0.0759878
2.58501	2.32455	23.1048	4.50617	0.0910703
1.58594	2.11887	23.8032	7.7667	0.0834697
1.76811	3.95029	28.0143	8.78041	0.0861975
1.06693	1.53623	31.308	12.8393	0.0768322
1.27847	1.25325	28.7563	5.84447	0.108392
1.64463	1.18182	33.6234	5.18917	0.121711
1.43981	1.67994	22.6667	9.04231	0.161613
3.4044	2.01299	29.0883	4.46737	0.118017
1.59203	3.31852	25.6014	4.84092	0.185139
1.0117	2.12018	30.3609	13.5182	0.118169
2.48929	2.72102	25.3462	4.59506	0.118023
1.02485	2.66673	33.6815	6.51376	0.115739
1.58257	2.14693	23.7258	6.76153	0.255994
0.982456	2.07088	23.8952	4.62716	0.0879433
1.11376	2.03595	23.2226	5.37124	0.0904255
2.02436	1.18831	25.547	7.03958	0.101386
1.05653	2.43001	41.5952	9.62355	0.212459
1.44784	1.98663	24.2375	7.45763	0.0844616
3.24992	2.45733	21.7339	6.40533	0.0882092
2.48546	1.50901	25.2681	5.05109	0.212643
1.05629	1.7229	22.9113	4.61538	0.0961879
1.50138	2.17583	27.8048	4.8566	0.0881459
1.30225	1.29398	38.7458	6.50823	0.141435
0.988304	1.22857	25.7722	10.0127	0.307067
1.48795	3.17457	24.4467	4.33333	0.0762411
1.16321	1.46842	49.951	10.6036	0.0838169
1.40103	1.60166	22.3871	7.23381	0.402263
1.25439	1.35478	24.7007	5.97065	0.175909
3.00376	2.73297	33.4876	4.4642	0.0791962
1.51072	1.61268	22.2903	4.39712	0.100735
2.99659	1.2886	27.7127	4.35665	0.0786052
2.22994	2.85235	25.6796	4.70617	0.0744681
2.17389	1.24188	40.9441	9.8005	0.0998227
1.36804	2.77725	43.8223	5.21605	0.187238
1.33406	2.01275	25.397	5.36552	0.0910166
1.20092	1.75455	70.0242	4.45679	0.101291
2.3511	1.78734	22.1613	5.23029	0.0874009
1.05198	2.77488	28.0117	9.15536	0.115417
1.69601	1.21753	22.8065	10.0984	0.108983
1.47054	1.18182	22.4637	7.04393	0.0862884
1.08304	1.19481	35.5236	4.79342	0.0784574
1.47251	1.57576	54.7975	7.64434	0.304563
1.9466	1.52056	56.6318	8.82707	0.103664
1.45332	2.14675	22.2488	6.6909	0.0765957
2.18478	1.42011	21.6452	4.5873	0.110012
1.0575	2.32287	41.0514	8.92884	0.0845998
1.12865	2.54178	29.4488	4.59117	0.101655
0.994152	1.37044	27.8806	5.18802	0.0762411
2.68011	3.58692	29.2608	13.1417	0.141696
1.28246	1.60373	24.9493	4.37037	0.138434
1.20819	1.95194	57.8614	5.71958	0.207114
1.11947	2.03896	27.6438	6.93363	0.138095
1.28655	1.29437	32.9323	10.2587	0.0961538
1.07018	2.20205	23.9736	7.84601	0.082205
1.19483	2.32948	67.7953	8.86554	0.10651
1.08187	1.44032	22.0081	7.1154	0.112903
1.157	1.2013	21.7097	5.01764	0.10527
1.55161	1.61189	24.3602	6.87631	0.0789007
2.73863	2.40615	35.2373	5.87243	0.0936761
1.0117	1.42614	37.1139	4.38889	0.0834945
1.67861	1.96647	32.2262	13.8786	0.0996285
1.16155	1.84853	33.9483	4.52862	0.0971718
1.40815	1.51665	26	6.05363	0.29442
2.73991	1.39045	28.0048	11.8149	0.0865839
1.0518	2.91435	29.5749	4.40895	0.194663
1.40412	1.73261	22.4194	10.8059	0.127738
2.08131	2.66895	25.7765	4.4784	0.172896
1.58333	3.15485	27.8264	6.64306	0.198306
2.63871	2.0238	30.5891	13.1279	0.0841393
1.75078	2.68831	35.6469	5.08586	0.0753546
0.976608	1.38624	23.7146	5.42105	0.196285
2.19751	1.63991	41.6834	5.89601	0.126399
1.17881	1.28977	29.9547	4.80182	0.265837
1.59591	1.17532	22.1452	5.79981	0.211016
1.94576	1.58071	27.0499	10.1349	0.0851064
1.31062	1.44917	21.871	8.91394	0.112969
1.05096	2.91879	39.7884	10.5924	0.0833333
1.11306	1.27679	29.2361	5.79027	0.0819543
1.52982	1.35281	24.5685	4.91387	0.101844
1.0518	3.12618	35.7453	5.65191	0.187375
1.19591	1.22078	33.8488	5.57202	0.0744681
2.03971	1.45698	24.9078	4.28395	0.0786052
1.18369	2.22895	59.3758	6.51399	0.237908
1.42347	2.43304	48.4896	7.99056	0.222029
1.19266	1.23295	21.8817	6.19285	0.369195
1.65078	1.49087	56.9598	4.82248	0.125994
1.11643	1.18831	35.6495	7.0457	0.112983
1.08939	3.12573	48.6809	4.60802	0.0744681
1.17491	1.45541	23.7016	11.0206	0.107302
1.00819	1.18182	29.0199	6.96945	0.162848
1.27339	1.3536	22.3355	8.24632	0.163897
1.11516	1.28322	25.3851	5.65338	0.0950999
3.23747	2.7082	29.9654	8.10338	0.0839243
1.0575	1.20779	21.9247	4.25926	0.0809693
1.79151	1.36895	25.3341	4.2963	0.28867
1.3909	1.29156	34.3772	5.0026	0.077305
1.06433	2.43497	22.6734	4.35802	0.116173
1.33121	2.80364	43.4654	4.29218	0.344619
1.02924	1.22171	25.8341	6.31674	0.0789007
1.09733	1.56939	54.1115	9.10451	0.172986
1.54804	1.38927	44.4182	5.64572	0.194659
3.15946	2.08849	75.5795	6.87654	0.112224
1.52913	1.72403	65.4095	8.2338	0.135993
2.2248	1.59717	38.3456	4.5	0.128383
1.12632	1.30592	24.6371	5.0823	0.100768
1.36156	1.26948	36.7314	6.4338	0.0758865
1.24035	2.4733	69.7073	5.18827	0.0822695
2.05189	2.6882	47.4901	5.19784	0.0933131
1.09649	1.59644	23.6075	4.28395	0.124631
0.976608	2.20005	38.2372	7.56486	0.125392
1.96041	1.53424	75.7255	5.53355	0.0880077
1.32774	2.51341	32.8994	6.64271	0.126075
1.14555	1.4039	32.6631	6.95012	0.100473
1.89465	1.19481	23.1198	5.29029	0.0827423
1.25439	1.83672	40.8186	4.38272	0.230386
1.52382	2.89754	39.909	8.35604	0.0861493
2.99649	2.00883	27.3065	8.70562	0.163196
1.7428	1.25974	47.5497	6.89454	0.080742
1.3007	1.55366	26.2713	5.15961	0.112607
1.40282	1.40435	23.2129	7.98349	0.232826
2.11381	1.34711	39.0409	9.48003	0.173337
1.03509	1.29935	54.9022	6.59416	0.211012
1.58678	1.49464	31.2832	11.3702	0.109111
1.20561	1.52871	23.3118	4.73525	0.0999846
1.31984	1.39147	38.7435	6.81405	0.183821
1.05673	1.21212	25.4721	5.46771	0.0848531
1.04825	2.62127	28.9135	4.43951	0.229187
1.09766	1.84706	22.1371	6.03732	0.0837766
1.02485	1.23864	24.4194	4.77469	0.105458
2.06566	3.4694	23.2401	5.0306	0.0837766
1.26747	1.3289	24.7495	10.9581	0.104559
1.41778	1.78764	22.129	6.64653	0.0807723
1.74881	3.50549	24.2957	7.20615	0.317309
1.00877	2.32076	22.1398	6.88621	0.092306
1.24203	1.53209	38.9373	5.32743	0.0987452
1.35749	1.43135	25.4337	4.25926	0.132377
0.976608	1.45455	22.129	9.31724	0.246634
1.13296	1.62449	28.5974	11.8089	0.187145
2.12595	1.75227	34.4653	4.46573	0.0830378
1.50264	1.50533	22.1774	5.84998	0.219827
1.36352	1.31039	35.8169	7.5066	0.0943262
1.00877	1.67366	30.0925	6.93369	0.0923759
1.08559	2.62282	32.7726	5.10199	0.077305
1.35965	3.19694	47.0452	4.34921	0.215276
1.84783	1.91613	56.9444	4.26749	0.0863475
1.17991	1.23308	31.5028	6.39292	0.104401
1.63899	1.70779	27.004	7.36675	0.0832562
1.13384	1.92796	23.3548	5.05664	0.111815
1.23906	1.26028	27.5054	5.43654	0.0896307
2.37842	2.55433	21.8065	4.63169	0.0819543
1.0919	1.43975	31.0688	5.37037	0.117091
1.20322	2.4075	24.9147	12.668	0.0864198
1.34571	1.32597	33.9381	5.63128	0.0901722
1.17391	1.71698	23.2161	9.95525	0.148593
2.11224	1.30774	24.5605	12.6004	0.0784082
1.47507	1.4072	21.871	6.71888	0.0871923
1.37169	1.27435	26.317	8.05676	0.0791962
3.16941	1.23284	23.4487	5.26593	0.0838169
1.45312	1.41558	41.1789	4.78395	0.231422
2.60801	1.6239	21.5699	7.77081	0.283193
1.12061	1.87852	29.0521	6.79174	0.0744681
2.25598	2.75718	26.0184	4.37037	0.166036
1.12197	2.45057	27.9533	12.0438	0.258612
1.05263	1.376	74.8109	10.4425	0.140807
1.4937	1.5421	22.4814	4.31893	0.101882
1.26301	2.1954	21.4194	8.24931	0.0983324
1.09779	1.3026	24.9355	5.15961	0.142512
1.05263	1.31926	23.5914	9.62186	0.21844
1.83001	1.3194	32.1387	4.90965	0.119185
1.8979	1.67024	37.849	10.2702	0.0920119
1.27127	1.65567	38.8721	4.93682	0.115554
1.0848	1.2747	64.2555	9.51172	0.183474
1.28358	1.17532	36.1335	7.72465	0.0861196
1.45135	1.52519	25.1101	9.61299	0.217297
1.26153	1.58291	60.8988	6.49092	0.0865839
1.83359	2.87477	42.4499	7.3112	0.116638
1.61842	1.19643	46.1818	5.62644	0.0858156
1.25421	1.41602	22.6613	10.1376	0.0914106
1.48276	1.9101	35.5108	5.77377	0.0815603
2.92408	1.52991	27.2835	12.6179	0.0744681
1.14074	1.53788	28.7993	4.37449	0.137976
2.60407	1.19481	36.479	4.87654	0.0985816
1.15789	3.44681	65.7873	4.30453	0.0952719
1.49875	2.40762	38.4835	6.41063	0.0797872
1.20468	1.52026	26.2724	5.72163	0.147336
1.58893	1.22263	21.8925	5.33379	0.10575
1.9622	1.67076	23.5839	5.50243	0.0913642
2.03	1.82096	23.5327	6.58599	0.112969
1.47339	1.52429	24.531	7.21775	0.185248
1.38502	1.87662	37.338	4.93227	0.0889748
1.55343	1.42312	32.7049	7.17642	0.0794326
1.00975	1.21266	30.9555	6.17882	0.0868794
1.25604	1.35584	24.5015	4.49912	0.183191
2.80444	2.66068	26.329	5.58424	0.168208
1.33422	1.37089	25.9613	5.02074	0.24809
1.27645	2.25516	28.7326	8.53239	0.114742
1.57181	1.36242	29.0291	4.77503	0.111111
1.71774	2.18643	26.7165	8.51759	0.132578
1.07091	1.2362	25.5853	9.88712	0.0821202
1.1769	1.43074	45.8626	12.1169	0.087766
1.24234	1.81426	22.0516	5.0862	0.102041
1.13074	1.33734	31.7779	9.31318	0.0858156
1.57183	1.19048	33.5622	10.7815	0.09051
1.15058	1.28293	24.9553	5.17923	0.0883441
1.35911	1.65032	22.4247	7.4083	0.190172
2.11397	2.35393	33.4952	9.18207	0.0937352
1.49631	2.94104	25.1398	6.30346	0.228849
1.02778	1.92396	22.5215	8.53929	0.142405
1.05146	1.64568	25.5275	10.3376	0.09013
1.29866	1.43263	26.014	9.10524	0.0944931
1.57149	2.17824	53.3205	4.98934	0.10552
1.44908	2.87772	21.4516	14.1006	0.0863959
1.35931	1.74207	26.6452	12.1212	0.0876674
1.19694	1.32383	21.4731	7.01115	0.292438
1.87956	1.27792	26.8509	4.90448	0.0977147
1.82783	1.17532	31.7105	5.14065	0.0985816
1.00877	1.6335	22.8831	6.91856	0.248168
0.982456	1.55628	21.3226	5.51902	0.15339
1.10453	1.4451	23.9847	7.71493	0.190356
1.01608	1.62604	49.8981	4.40741	0.0987842
1.05556	2.21096	26.428	5.35418	0.242929
1.05783	1.44596	24.3797	10.5146	0.0874705
1.79564	1.55216	46.9207	6.08836	0.119168
1.80153	1.93374	26.2015	4.75309	0.0870764
1.80326	2.26616	33.0194	13.4199	0.0892199
1.00731	1.39675	48.3198	13.7585	0.157338
1.29543	1.23191	27.0449	13.3313	0.079344
0.98538	1.18182	24.3548	5.05458	0.108353
1.93978	1.22468	36.1274	4.70713	0.0906788
1.14269	1.56412	22.7634	4.30864	0.0855792
1.18275	1.23613	27.5935	6.56102	0.0762411
0.991228	2.20666	33.3502	7.16468	0.126379
1.81887	1.97403	31.0942	10.5591	0.0913543
1.10698	1.37608	43.6501	7.91982	0.0809155
1.3905	2.05339	33.0462	5.22317	0.173832
1.07147	2.09916	24.7038	5.20552	0.195522
1.38632	1.23506	33.5517	4.844	0.137578
1.22701	1.20617	37.8754	4.30864	0.109929
1.95981	1.70594	31.2366	5.54336	0.113145
1.28207	1.34416	32.2141	4.39369	0.194186
1.58785	1.77439	44.55	6.90991	0.0935776
1.86274	1.68465	36.5679	6.45562	0.0805471
2.24972	1.42387	25.9742	5.83796	0.084539
2.81322	2.12649	47.3894	8.26364	0.160678
1.69379	1.48304	38.8131	7.35706	0.124984
4.93705	1.79192	40.0833	8.25799	0.0996232
1.4015	1.40609	33.7255	4.50154	0.242606
1.44181	3.74081	28.0867	4.99447	0.0744681
1.33788	1.65666	22.9223	4.42152	0.0852428
1.20139	1.97874	54.3391	7.20177	0.0828268
1.27594	1.43896	24.621	4.29218	0.250109
1.126	1.29314	22.0968	4.44198	0.0950355
1.05702	1.41373	32.2198	8.798	0.0807723
3.00392	2.24242	37.1196	4.91008	0.109565
1.23054	3.30125	27.428	10.0491	0.0815603
1.61783	1.58501	46.396	4.73909	0.156926
2.28102	1.49154	31.8813	4.7284	0.0756501
1.03392	1.48393	22.957	4.9892	0.0881797
1.32217	1.57792	37.4379	6.01844	0.093906
1.28165	1.32395	43.1419	5.29994	0.0825274
1.13993	2.58695	32.6661	15.6577	0.218085
2.10341	1.59964	24.9204	5.93221	0.116172
1.10568	1.3842	27.4337	9.15473	0.103937
1.12135	1.46732	23.8387	7.26543	0.0886525
1.23551	1.59842	29.31	6.43799	0.0925363
0.989766	1.37616	25.3852	6.92468	0.101285
3.03496	1.44567	46.4795	4.64387	0.0885616
1.9546	1.26387	28.5685	4.33642	0.152606
1.2588	1.33694	66.4307	6.69229	0.117715
1.414	2.09489	26.6313	4.62901	0.110993
1.16776	1.21104	25.043	6.57342	0.0845154
1.12573	3.32668	26.3785	4.32922	0.0833333
1.27859	1.79058	42.7608	7.18457	0.084784
1.24194	2.05426	30.0434	5.43092	0.11869
1.51822	1.45298	43.1371	10.5921	0.0833333
1.23684	1.22727	42.3143	11.491	0.0944382
3.28866	1.25584	22.0645	11.1795	0.0934791
1.44769	1.88312	25.6532	5.81342	0.0790274
2.27144	2.54013	41.274	4.78342	0.0762411
1.78211	1.37506	23.0226	6.6764	0.244652
2.67254	1.26912	23.4718	9.37097	0.143043
1.14912	1.51272	26.4104	5.08916	0.101847
1.52665	3.50703	41.6906	9.74549	0.222527
1.81659	1.48369	21.2903	5.25966	0.0944552
1.44856	1.20563	27.9653	6.1591	0.0941236
1.41924	1.22114	68.0128	5.65891	0.156983
1.96715	1.90858	33.2378	4.92705	0.211395
1.44006	2.57098	26.9648	13.0952	0.0780142
1.51783	1.73091	23.5412	6.10786	0.0833333
2.15639	1.26867	36.8866	7.75571	0.0874191
2.02009	1.43878	28.5607	10.1316	0.0820669
1.03509	1.56257	52.3328	7.44163	0.206418
1.13684	2.16242	26.1385	5.30633	0.218676
1.50897	2.10813	21.4516	6.01023	0.174753
1.19786	1.30808	55.1459	8.66952	0.107872
0.982456	2.45061	23.3871	4.8165	0.139573
1.67548	1.25584	26.1475	7.83607	0.224149
1.17146	1.48016	31.6486	5.27497	0.112748
1.05556	1.5043	26.7048	14.0709	0.0840425
1.52718	1.21104	24.4395	9.05459	0.0841393
1.04094	1.31936	30.0356	10.7594	0.0862145
1.10749	1.80895	25.3294	6.10411	0.0899189
1.40754	1.36116	22.1828	8.48833	0.0991041
2.8268	1.96188	78.0567	9.42824	0.0963357
2.4562	1.23268	36.5397	6.72229	0.0744681
1.01365	1.95355	32.3032	9.241	0.0794326
1.08723	3.02037	23.4839	6.35002	0.0799842
1.38565	1.22078	28.7085	4.34568	0.0780142
1.53164	3.25103	22.0726	4.94919	0.105496
2.60164	1.28247	26.0544	5.53272	0.268729
1.14795	2.21221	28.654	6.31236	0.262615
2.93606	1.2621	78.3443	4.6358	0.0871749
1.10039	2.17409	35.2491	5.08674	0.0848336
1.05068	1.20455	23.5161	4.77641	0.16175
1.41049	1.41982	52.069	4.33333	0.0828014
1.33445	3.27466	64.0164	7.04725	0.0954363
0.98538	1.69481	25.7348	5.29517	0.0833333
1.9517	2.9921	36.6438	7.83299	0.191019
1.61822	2.30813	69.4393	4.96605	0.0780142
1.27984	1.57167	40.3107	10.2295	0.118273
1.01316	1.29888	39.8366	4.99568	0.0879876
1.32672	1.49736	33.3169	8.31734	0.0780142
1.16452	2.93464	29.4134	9.14428	0.15496
1.42463	4.61533	24.1797	5.64632	0.0931318
1.63278	1.94843	27.2782	4.40917	0.243893
2.52794	2.21548	23.129	7.18879	0.160379
1.40293	1.69536	52.7349	4.28395	0.109364
1.04929	1.53147	36.7864	6.02559	0.0963166
1.97827	1.64419	43.4218	7.06203	0.116675
1.06082	2.11343	24.5249	7.88275	0.0998987
1.05597	1.2903	52.4106	7.02077	0.09199
1.16684	1.3047	38.6748	5.14528	0.0857713
2.36106	1.68126	28.2728	7.9075	0.0797872
1.70511	1.76268	40.4336	8.0625	0.144793
1	1.48519	31.2599	4.30864	0.169769
1.2789	1.20065	22.3065	5.19136	0.0753546
1.27544	1.21429	65.1061	7.36392	0.0907801
1.08232	1.25108	24.0704	4.90782	0.118755
1.12496	1.54897	31.422	10.928	0.130655
1.6871	2.18737	29.1697	8.8991	0.224752
1.28478	2.36234	22	4.40329	0.157329
1.08187	1.34779	21.5806	8.48336	0.079078
1.26901	1.46787	22.1452	4.9281	0.142328
1.11643	1.23117	33.3145	8.93678	0.0842199
1.10526	1.66302	42.1469	5.37449	0.120812
1.13492	1.99931	37.7553	7.4302	0.0780142
1.99699	2.41374	22.7419	4.62346	0.230876
1.72285	1.83938	24.6331	4.32099	0.141884
1.74854	2.98572	23.7348	4.61591	0.196809
1.57797	3.01338	38.8822	5.90754	0.140204
1.26738	1.37804	28.3478	9.23538	0.0744681
1.7254	1.61281	28.3995	8.70382	0.139501
2.84656	1.73165	45.5838	14.0916	0.0998627
1.51645	1.24242	35.2574	6.28732	0.0812057
1.4152	1.38023	29.2241	8.71778	0.0753546
2.03524	1.22971	22.1484	4.2716	0.0794326
1.90828	1.83433	62.0856	6.64178	0.197729
1.95569	1.29942	35.172	6.20671	0.232296
1.19721	1.85797	25.8213	7.57394	0.0892783
1.36897	1.34794	25.1613	5.69753	0.0900315
1.25918	1.80371	24.4885	5.05401	0.154937
2.85937	1.27706	26.1041	4.91553	0.15127
1.03411	1.7412	40.0079	13.4235	0.0928805
1.01023	1.95133	26.6357	6.55873	0.173932
1.32101	1.70761	26.8629	9.25727	0.134872
1.17957	2.35634	24.8629	4.71605	0.170651
1.81716	3.59085	23.9476	7.28002	0.107979
1.45018	1.85471	26.74	10.0123	0.144186
1.18036	1.5579	26.3548	5.76543	0.0821513
1.89299	2.13713	21.7778	5.93488	0.15782
1.13651	2.41309	32.908	8.41989	0.0920672
1.53563	2.67728	24.4395	5.14847	0.202508
1.65047	1.2417	22.6694	4.81481	0.0943938
1.30778	2.34792	26.3491	4.56855	0.170004
5.81682	2.13772	50.5587	8.78843	0.125214
1.17836	1.59935	21.6022	4.38095	0.0815603
1.16359	1.25	28.4315	5.77954	0.11951
1.14766	1.47502	32.1648	5.97598	0.0827423
1.00585	2.07051	33.059	7.92217	0.0903322
1.66705	2.41959	23.2204	4.47654	0.100391
1.35388	2.61542	33.7833	5.01754	0.31959
1.13503	1.74769	32.3962	7.30897	0.0918046
1.06784	1.20779	30.1792	6.08719	0.0840425
1.35047	1.27686	21.3871	9.16967	0.109597
2.87167	1.49225	24.9315	5.22667	0.0918762
1.19503	1.28394	31.2102	8.99837	0.0762411
1.40175	1.57326	38.0254	7.5066	0.0800405
1.22105	1.20519	43.2663	8.98846	0.0924941
2.50447	1.31668	22.4194	9.17109	0.169129
1.20673	1.2224	23.0293	4.55176	0.191076
1.65175	1.4965	27.1736	4.51852	0.140415
1.05393	2.96126	26.5673	9.66299	0.0797872
2.36324	1.19481	25.5828	4.80471	0.0780142
1.24801	2.02165	27.3394	6.65231	0.0946808
1.01754	1.17532	23.8065	4.75533	0.0827423
2.11945	1.23593	71.3545	9.28363	0.140541
1.3174	1.65073	35.6431	6.00163	0.0765957
1.10965	1.82114	35.4351	4.57064	0.0765957
2.24535	3.72286	21.9355	4.68248	0.0864362
1.40518	2.07105	72.9239	5.46878	0.165384
1.53053	1.55276	25.1871	4.30247	0.109742
1.46728	2.18435	25.7287	4.42284	0.113475
1.44227	1.97387	26.3629	9.39325	0.0889608
1.47563	1.99124	51.6042	7.78192	0.0989239
1.37507	1.72445	21.2258	4.39352	0.193729
1.70101	2.07872	30.7778	6.77399	0.0812057
1.03947	1.46371	27.0723	13.188	0.0825735
1.72691	2.54976	33.0828	12.6731	0.0913927
1.38304	1.8049	29.3139	4.53086	0.278562
1.20654	1.2316	48.2382	8.2564	0.0843972
1.15389	1.62443	78.0066	6.77572	0.142361
2.43966	1.33847	64.1945	9.3801	0.161179
1.19813	1.56083	26.9106	4.65666	0.162554
1.17969	1.62575	28.1865	7.56524	0.113095
3.8399	4.10555	23.8495	14.51	0.176625
1.53916	1.54363	32.1744	4.30864	0.285156
1.01365	3.38691	50.6148	5.22162	0.134425
1.35414	1.28099	23.607	6.85299	0.172817
2.11499	1.18182	25.9476	7.04296	0.173735
1.09858	2.0141	27.0519	5.72263	0.128968
1.33954	1.67937	21.5323	5.75648	0.13373
0.976608	1.22619	22.8986	6.21022	0.120536
1.03592	1.24531	24.8376	8.37488	0.146726
1.07749	3.40004	60.27	13.463	0.180265
1.89434	1.38666	27.0479	11.3516	0.119048
2.61429	1.38112	36.3082	11.7476	0.146949
3.40968	1.45145	21.5161	8.50648	0.187282
1.39699	1.71521	52.2204	11.3803	0.159302
1.13576	1.26623	25.879	4.98889	0.113095
1.48538	4.58387	29.3963	7.28061	0.142587
1.45239	2.50789	24.4633	5.00444	0.172206
4.42883	1.82088	23.1129	6.93476	0.120908
1.70039	2.98469	38.2973	9.01045	0.273564
1.07177	3.08147	54.5943	10.0083	0.141026
1.05629	1.20594	34.4357	9.21928	0.180408
1.81248	1.35349	50.5306	7.11032	0.113095
1.19967	2.26431	21.6129	10.1262	0.248641
1.83561	1.27922	21.7097	10.0004	0.204663
1.56915	1.48102	25.129	6.0728	0.113095
2.39893	1.29177	27.3464	6.24293	0.113095
2.30161	1.27502	22.4903	10.6552	0.240226
1.22974	1.19481	27.2377	6.13279	0.276589
2.24019	2.31325	22.9409	5.50397	0.135154
1.88647	1.28247	24.2323	11.9915	0.250206
1.49283	1.51623	30.198	5.43987	0.135119
1.00702	1.65562	33.6641	11.6875	0.1694
1.26184	1.83942	23.0387	5.29778	0.200966
1.36301	1.36111	29.067	9.80357	0.170933
1.64488	1.8745	21.8387	7.39642	0.283025
2.68903	2.13375	34.553	5.56	0.131223
1.14745	1.32468	24.6129	11.2787	0.184345
1.01462	2.05906	31.3952	7.49395	0.117857
1.05978	1.18831	34.9076	5.22444	0.130411
1.71259	2.09155	22.9677	13.8877	0.132771
2.23874	2.28257	22.3871	10.0898	0.117347
1.65523	1.86454	27.3958	7.44399	0.144151
1.09795	2.2414	23.2086	6.56953	0.154686
1.2479	1.32208	21.9355	6.02639	0.117772
1.29294	1.58983	23.8038	6.14532	0.199917
1.31991	1.72078	30.9095	12.8383	0.153367
1.20068	3.30418	46.4629	5.39201	0.118056
2.19003	1.17532	22.8638	8.36996	0.144147
1.07435	1.23554	42.18	10.289	0.119898
2.26944	1.45709	70.4574	6.10307	0.18082
1.05458	1.20779	35.7736	13.6765	0.139205
1.05146	1.39026	28.5195	8.82428	0.179225
1.01462	1.36865	26.7051	5.29683	0.117394
1.04503	2.07049	27.5066	5.32667	0.120833
1.04825	2.52538	30.1468	4.91111	0.191993
1.37873	1.18831	70.7023	12.9558	0.259336
2.01082	1.90178	29.2408	7.60827	0.122024
1.44457	1.51147	22.6903	9.47794	0.209462
1.16923	1.5423	37.5562	5.21728	0.301139
1.03314	3.4967	24.9007	5.10606	0.113095
1.21749	1.36201	30.574	11.0881	0.206572
1.36891	1.45511	28.4829	5.13111	0.246609
1.39821	1.26948	23.8525	4.98	0.288188
2.8187	1.21948	23.8238	9.54437	0.116815
0.994152	3.78009	27.9405	12.17	0.152165
1.36464	1.66384	33.8989	10.09	0.164939
1.24327	1.61509	26.1242	8.85233	0.165293
2.19273	1.65228	39.0202	7.68909	0.306508
1.46308	3.36442	21.621	10.2941	0.114583
1.05029	1.19913	21.4194	5.44514	0.139622
2.16799	1.35365	22.7863	8.23556	0.114583
2.44638	1.3852	48.2038	5.74706	0.144026
1.01053	1.51948	22.4435	5.01111	0.113095
1.22602	1.4881	26.6978	5.51049	0.114881
2.54514	1.78836	44.0412	5.86996	0.13378
1.18743	1.71241	21.4194	8.22606	0.156513
1.43928	1.21688	55.1024	5.70206	0.154762
1.14864	1.50812	34.553	7.29328	0.146856
1.18129	3.3508	22.729	8.49395	0.179422
1.12476	2.15667	48.5461	5.41349	0.136905
1.76205	1.33539	22.7688	6.41624	0.156136
1.08983	2.27098	23.7097	11.434	0.127976
1.07342	2.01122	32.0009	4.91111	0.187016
1.36147	1.18831	25.4383	9.47474	0.240606
1.70029	1.86364	22.1226	5.11111	0.233304
1.21691	2.01418	27.5381	6.07696	0.21236
1.95538	1.44805	25.2481	6.38341	0.175321
1.50851	1.22078	25.121	5.90514	0.195259
1.22291	1.31069	23.8468	13.2638	0.190989
1.13041	2.30303	28.0968	5.73643	0.113839
1.31299	1.21818	47.9915	10.943	0.140476
1.2306	1.4802	42.5637	9.53126	0.174812
1.2255	1.44156	44.4281	5.72407	0.132576
1.64713	1.55932	21.8145	6.20444	0.171003
1.20582	1.72263	26.0672	8.63895	0.158749
1.36036	2.65091	29.6651	9.81102	0.119048
1.99774	1.66761	21.8817	5.39231	0.119792
1.36318	2.01364	27.6452	4.92222	0.231627
1.56461	1.57742	21.9355	11.7365	0.18275
1.07895	1.53966	21.4194	5.26296	0.171898
2.32768	1.28409	26.1227	10.9818	0.193888
1.46465	1.35141	23.7921	6.30858	0.130952
2.1716	1.21591	27.9468	5.61423	0.164249
1.39289	1.94403	24.9957	5.54978	0.124188
1.53271	2.41797	29.6062	13.0804	0.212922
1.21905	1.34935	30.1071	9.82336	0.163605
1.35416	2.94178	24.5203	7.49067	0.188882
0.994152	1.24351	25.5894	8.87214	0.297651
1.05945	1.33593	23.6728	6.78836	0.128434
1.22627	1.31464	23.1801	5.33333	0.134411
1.45691	1.63525	36.3653	5.90074	0.187295
1.08553	1.23052	24.8622	8.01827	0.188317
1.30263	2.11744	22.5419	5.47441	0.122685
2.51982	1.26531	31.7153	5.74524	0.137091
1.73454	2.94943	24.39	7.13563	0.161458
1.22355	1.66176	60.0534	5.26467	0.133929
1.33268	1.56525	22.5878	10.5167	0.135913
1.02485	1.2289	21.4032	11.028	0.226313
1.45614	2.24839	67.3607	6.10545	0.156682
2.366	1.30065	27.1242	8.59628	0.186126
1.18036	1.69737	27.1366	12.2232	0.141786
1.40653	1.58117	33.4763	6.73535	0.1479
0.990253	1.4598	22.1613	6.20877	0.156129
1.00877	1.39351	26.8206	6.97227	0.295755
1.26291	1.19643	38.0098	7.28883	0.26907
2.73762	1.21212	40.3402	5.98389	0.183624
1.0946	1.56213	68.1015	8.46586	0.123512
1.03509	1.40883	33.3438	9.65057	0.120536
0.988304	1.18669	23.4758	7.92843	0.134615
1.10473	3.83295	35.9008	6.57571	0.113839
1.63326	1.52868	24.843	7.48771	0.164711
1.12021	1.90949	30.9845	5.13056	0.271799
1.25313	1.23377	23.7826	11.209	0.128189
2.32294	1.8788	24.1581	8.86202	0.113095
1.22375	1.4363	22.0484	5.37361	0.113095
2.17499	1.24156	26.6436	10.7585	0.20207
0.976608	1.45661	22.9194	6.89514	0.122619
1.06652	1.84876	31.0496	12.3336	0.235315
1.12531	2.1479	74.2086	7.27141	0.210809
1.28027	2.03971	39.5548	7.69535	0.128759
1.7174	1.44953	43.2961	5.7904	0.227689
1.17269	1.43896	47.9511	10.608	0.123016
1.40968	2.07935	21.2581	7.29922	0.277874
1.63416	1.42844	21.7903	9.66646	0.119048
1.03509	1.89908	23.328	8.44512	0.147941
1.6116	1.87001	45.43	6.22593	0.114583
1.45601	2.21781	22.2366	8.10289	0.123214
2.18251	1.77146	24.043	10.0398	0.231445
1.20429	1.63398	28.4417	5.9081	0.253968
1.6778	1.66688	25.1169	5.18889	0.115079
1.03743	1.51096	49.9205	11.9971	0.228269
1.22605	1.64696	24.4012	9.54927	0.120701
1.02924	1.64996	23.1083	7.96358	0.217973
1.87546	1.71713	21.7419	11.7987	0.304138
2.2929	2.33531	39.2154	12.0246	0.122906
1.82934	1.31865	41.6505	12.5692	0.219649
1.55861	1.39935	22.043	5.8455	0.184788
1.36995	2.19964	25.1965	9.21643	0.166574
1.20098	3.13115	21.8145	5.61111	0.124339
1.11306	2.30369	24.9435	10.4807	0.145653
2.32596	1.43669	48.6203	4.96778	0.188792
1.78582	1.45529	54.8637	13.3169	0.173436
1.04159	1.3013	39.8131	4.97222	0.114087
1.04548	1.36364	21.9516	6.07823	0.323396
1.02534	1.33648	28.3715	5.31556	0.123512
1.37271	2.50238	22.6882	5.52796	0.20082
1.4264	1.53097	52.2201	20.0713	0.115327
1.5003	2.67987	23.4484	5.67521	0.113095
1.15246	1.81715	24.9445	5.65778	0.179301
1.30094	1.78217	22.3226	6.23099	0.122917
1.13409	1.9801	22.9637	7.50979	0.239673
1.94298	3.25284	22.3441	4.98148	0.131779
3.3212	2.05708	51.4024	5.76302	0.128968
1.35719	1.22078	23.629	5.03222	0.180886
2.74255	1.74152	24.4677	6.50454	0.125638
1.07968	1.68357	26.6559	6.32674	0.135863
1.61531	1.601	37.3855	6.75505	0.133929
1.42831	1.75974	41.3238	11.6662	0.210706
1.38852	2.19267	29.5935	13.4784	0.176319
3.11142	1.24119	21.5806	5.92389	0.236768
1.37395	1.42614	49.6871	11.5352	0.171801
2.72343	2.14238	40.1636	7.03411	0.167069
1.25702	1.17532	21.5806	5.61541	0.313478
1.03977	1.62941	28.3724	7.61704	0.133078
1.49292	1.21645	41.6509	6.29617	0.142857
1.26926	1.60714	33.7051	11.3746	0.129889
1.77278	1.87013	51.8866	11.5089	0.139268
1.06481	1.90936	42.4941	8.28854	0.152804
1.33111	1.34213	22.6828	8.51942	0.127604
1.1306	1.85631	30.5244	12.0323	0.113095
0.988304	2.51405	21.9516	11.3346	0.127706
1.25844	1.30834	50.7988	7.66564	0.22769
3.24584	1.78788	24.2137	9.27698	0.138393
1.03363	1.45455	24.8522	5.99199	0.440506
1	1.42713	51.7566	5.77261	0.168781
1.04825	1.85699	27.0286	6.20585	0.129464
1.22024	1.52597	29.1919	5.78581	0.176257
1.80589	1.39261	42.016	6.07826	0.157509
1.27296	1.82315	55.2575	9.30147	0.12004
1.17269	1.25812	38.5492	5.38687	0.136756
2.06386	2.28039	36.4252	6.05608	0.127976
3.34004	2.33987	22.2634	6.29756	0.134629
1.27916	1.46623	26.621	6.41634	0.148268
1.1382	1.961	39.0221	6.80044	0.115327
4.4031	3.21	21.371	4.93333	0.126488
1.05078	2.65882	30.1268	13.6511	0.256098
1.03314	2.51166	22.6129	5.89826	0.113095
3.07302	2.20724	30.7809	16.2233	0.146967
1.19512	2.70877	22.1976	9.54351	0.125
1.04094	1.87233	24.7816	6.91349	0.130326
2.50149	1.32792	27.1935	5.19444	0.130456
1.14766	1.27597	23.7957	5.25128	0.157459
1.08821	1.35714	30.8105	6.71496	0.196795
2.52179	1.49453	30.8615	5.65	0.130607
1.21465	1.68533	22.3629	8.10442	0.113095
1.60489	1.24026	34.953	5.83816	0.27965
1.96027	1.26984	43.497	8.24214	0.146244
1.31257	1.27706	21.871	5.95401	0.12585
1.6476	2.28977	31.0502	5.27259	0.224563
1.21735	1.27155	60.408	6.64427	0.122024
1.34062	1.84098	21.6344	9.81409	0.175279
1.86251	2.77192	63.8856	12.9912	0.166747
2.50742	1.74877	31.1885	5	0.13922
1.0692	1.18831	25.2129	6.15417	0.12314
1.33669	1.34912	27.0472	11.4817	0.120833
1.35938	3.91964	44.0727	12.709	0.279857
1.75731	1.80851	30.2278	13.1921	0.243971
1.08169	1.35714	53.7037	11.8525	0.120701
1.00585	1.64773	73.8458	9.36589	0.11756
1.06316	1.93402	50.9717	6.11282	0.174107
2.02407	1.27489	29.4381	12.1176	0.171627
1.28824	1.44177	45.9458	5.62071	0.119048
1.9261	1.74133	21.7097	8.51822	0.142432
1.01852	1.30964	22.129	10.4964	0.143006
3.22687	1.29824	30.4486	6.19289	0.165399
1.47357	1.66721	26.2694	5.40045	0.127126
1.70378	2.11537	29.0307	12.4271	0.159738
2.65477	1.70335	52.9319	4.90556	0.186594
2.11377	1.27192	25.9338	7.71909	0.120942
1.73696	1.60516	21.9355	6.74119	0.120701
1.09747	1.91316	36.7322	7.17128	0.246233
1.72674	1.25325	23.2724	10.3049	0.117063
1.5698	2.03192	22.2339	5.43232	0.16463
1.48169	3.59467	21.879	4.9	0.230457
1.09774	1.33267	65.6549	5.69889	0.156829
1.48326	1.51795	25.9393	10.861	0.122917
1.44721	1.58196	38.9956	4.94444	0.124687
1.51997	2.84646	30.4052	8.41071	0.142857
3.8398	2.24778	54.0843	10.3502	0.181101
1.13074	1.37184	28.0924	8.38194	0.200878
1.08772	1.2289	55.6308	16.5933	0.210755
1.2122	1.65093	27.3326	10.432	0.215514
1.14035	1.4283	29.4933	10.5755	0.122024
1.29557	1.21861	21.9892	4.96481	0.12004
2.45574	1.44453	29.4468	11.4169	0.136054
1.08985	2.31078	66.7198	5.97654	0.192141
2.22705	2.09432	34.8073	7.37809	0.290072
1.23684	2.09139	66.2006	9.69717	0.152429
1.1675	1.34645	32.6267	5.08611	0.127976
1.12236	2.02365	29.3379	8.56403	0.128247
1.72992	1.71696	28.2162	6.31599	0.134629
2.89425	1.45936	65.2202	8.17162	0.126063
1.01871	1.7125	30.2469	4.92222	0.158616
1.37357	1.40625	22.1806	5.6592	0.164311
1.04483	1.32047	25.2053	9.21532	0.152296
1.09795	1.36138	27.0701	7.90188	0.200492
1.57589	1.72418	26.4811	5.98127	0.21661
2.01021	1.61658	25.5862	4.93333	0.187919
1.12105	1.62416	26.3777	7.47598	0.124008
1.1462	1.22403	38.2154	5.90864	0.282738
1.74683	1.39684	48.989	5.75185	0.125
1.58113	1.34105	32.5724	4.91111	0.149015
1.07927	2.12247	31.0293	5.22222	0.126576
1.35257	1.49351	22.9447	6.37167	0.141134
1.12047	1.3539	22.2366	9.23506	0.205597
0.976608	1.30075	40.996	5.00278	0.17073
1.39417	2.97134	24.4663	4.97778	0.369523
0.976608	1.28571	23.7355	12.8984	0.193452
1.6761	1.2039	27.1477	8.86965	0.116071
1.02339	1.44	58.1181	10.5876	0.183355
1.12752	1.18182	21.6774	12.6558	0.186489
1.92101	1.9417	21.2903	8.97037	0.129464
1.35163	1.57335	55.1752	5.23254	0.247099
4.15773	1.94334	29.8633	8.02831	0.115476
2.46509	1.49224	22.3161	5.52026	0.226236
1.19163	1.19481	30.2153	11.5642	0.16886
1.07407	1.53729	29.0238	12.9453	0.234386
1.59854	1.33766	44.8833	9.14396	0.257874
2.42406	1.3536	22.0565	4.99444	0.125992
1.22515	2.05783	58.3369	9.50218	0.150992
1.75362	1.42123	48.9734	6.41671	0.140327
1.15581	1.27476	21.3871	7.51008	0.144345
0.994152	1.44318	23.2258	5.52751	0.138207
1.54412	2.3347	37.1277	5.51458	0.120833
1.34094	1.50487	52.5975	7.59587	0.167538
1.26761	2.72193	21.6774	13.8302	0.196359
1.78038	1.49111	21.5323	4.96667	0.127036
1.12061	1.31818	23.8817	5.5271	0.278037
3.7723	2.8891	32.1023	5.25397	0.177951
1.75335	1.83202	25.7387	7.16467	0.155506
1.19578	1.63455	75.1342	6.68452	0.146884
1.49428	1.90788	23.2151	5.35556	0.16538
1.06491	1.21104	24.3367	8.25898	0.12294
1.1765	1.25866	27.8735	5.23611	0.11942
1.61084	1.20686	21.4597	9.73388	0.169408
1.5513	1.29302	32.9625	5.71156	0.141098
1.2608	3.2079	23.3919	4.975	0.188933
0.984405	1.64635	28.3896	10.0095	0.189732
1.41592	1.50848	26.5884	7.19879	0.217823
2.05456	2.07198	23.2984	11.2538	0.153367
2.10667	1.2785	28.1627	10.0823	0.125687
2.48201	1.28506	26.9867	10.2988	0.16113
1.29346	2.95998	46.9174	6.92222	0.12128
1.0923	2.17713	52.7682	9.34773	0.142086
1.42195	1.2776	21.6129	12.6663	0.188962
1.30181	1.22542	33.509	7.06729	0.179936
1.89518	1.41976	24.621	6.21037	0.156028
1.3668	1.9432	22.3763	11.9287	0.177814
2.09469	1.3111	32.6714	7.5213	0.169259
1.24959	1.46441	26.275	7.84943	0.151515
1.15741	1.27778	32.1442	12.9378	0.177145
2.14924	1.74165	40.0065	5.37361	0.126323
1.21079	1.36314	28.5973	7.63853	0.132178
1.29452	1.23864	54.0712	4.91111	0.120833
1.43874	1.41788	38.7674	7.34225	0.143427
1.12622	1.92403	25.3306	5.06667	0.127706
2.83491	1.66931	26.0877	15.2403	0.201259
1.10357	1.96338	23.9086	6.71346	0.150069
1.34211	1.93575	27.8142	5.23704	0.150298
1.65024	1.9866	29.5323	4.93333	0.213423
1.10819	1.56414	23.8253	9.88327	0.145022
1.49033	1.32143	32.6681	5.74778	0.183477
1.06516	1.49439	25.424	13.6176	0.178877
1.17008	1.45265	28.129	6.22556	0.147414
1.36183	3.29808	24.8871	5.29074	0.164435
1.9879	1.24286	34.912	5.83733	0.143566
1.04435	1.2013	26.5705	11.5852	0.123884
1.16546	1.35714	41.5447	13.471	0.174256
1.29843	1.48501	22.9862	5.73527	0.158609
4.02108	3.20036	79.6491	5.79697	0.239347
1.58428	2.87516	26.0883	15.7782	0.225614
0.997076	1.74886	21.9585	7.779	0.208571
1.60488	2.35244	24.1144	5.44274	0.170319
1.31261	1.39214	75.5735	8.08779	0.174884
1.08187	3.16113	24.0387	5.76239	0.183268
4.09872	2.4665	32.9208	10.489	0.131828
2.67012	1.49488	33.8576	5.91864	0.154865
2.39947	1.43818	29.5327	5.51963	0.175595
1.25233	1.22727	24.8368	7.59192	0.14881
1.91021	1.28247	51.9755	12.6748	0.113095
1.08878	1.44412	49.0377	7.36242	0.194131
1.39639	1.56025	31.0304	7.50552	0.155258
1.12531	1.85405	59.1386	7.40598	0.114583
1.53947	3.05552	53.6226	5.50819	0.197545
1.05044	1.32218	24.2304	5.27895	0.134242
1.25049	3.49327	24.1398	5.58039	0.15361
1.22713	1.26818	22.6129	7.53348	0.196726
1.64921	1.72774	68.6615	11.3921	0.116071
1.13372	2.12013	28.8137	6.0213	0.170139
1.1693	2.85766	36.1171	5.70476	0.177083
1.40626	1.59443	34.8091	5.02778	0.12004
0.976608	1.71641	35.1789	13.0789	0.1655
1.12817	1.82199	57.1294	5.56863	0.13459
3.7976	1.91365	45.0304	5.66889	0.123377
1.12943	1.41266	23.4106	5.35344	0.118552
1.08007	2.26896	24.5484	5.05556	0.151268
1.10048	2.11035	23.6613	6.85538	0.20744
1.41467	1.85714	22.129	4.9963	0.120833
1.95449	1.20563	42.3339	5.17265	0.132738
1.31861	2.17766	36.3708	7.5602	0.209845
1.29323	1.86649	52.0597	6.19944	0.287148
1.23404	3.29193	41.6915	8.23599	0.11756
1.56842	1.56919	49.3117	8.03385	0.160417
1.31115	1.67901	42.35	7.29216	0.116071
1.20829	2.33814	23.0993	7.32281	0.141741
1.23445	2.42932	28.0768	10.3645	0.196934
4.72491	2.00573	30.8246	11.5661	0.22786
1.12387	1.29491	51.7568	5.39444	0.14752
1.11988	1.2197	25.981	15.2152	0.18405
1.32066	1.38456	22.8065	12.0854	0.204701
1.6114	1.34876	24.3275	6.07842	0.126653
1.43683	1.29935	21.6774	7.15194	0.137946
1.09064	1.19805	46.2152	7.42947	0.140164
1	1.47602	26.1075	12.0614	0.183333
1.49542	1.35812	35.6751	6.46176	0.114583
1.57969	1.81104	25.4223	12.5669	0.113095
2.38874	1.27561	25.9583	5.48065	0.22502
1.05775	1.17532	42.2111	7.87505	0.118452
1.23761	1.20292	32.6145	13.6082	0.159127
1.04548	1.26929	22.9862	6.33379	0.115079
3.42237	1.24026	26.2234	4.95926	0.15501
1.66511	1.86909	30.9764	4.97222	0.114087
1.34864	1.58553	44.0541	8.47249	0.21331
4.04977	2.55864	37.1872	5.3787	0.127588
1.38171	2.00284	33.057	10.4172	0.0381166
1.03342	1.94636	25.0714	12.3494	0.0541566
2.67951	1.23247	42.3374	10.3393	0.0440957
0.98538	1.2013	22.7634	9.27509	0.0563341
1.33626	3.64469	30.5568	5.35062	0.0493273
1.01462	1.24397	26.1871	5.15278	0.0399851
1.45549	1.27922	22.7419	16.5757	0.101487
2.75825	1.76871	36.181	5.72943	0.0805523
1.35319	1.77574	27.1294	15.2215	0.0516182
1.04898	1.60575	26.707	5.03333	0.0616125
1.11028	2.84982	22.25	6.7592	0.045441
1.39992	1.87574	21.4409	6.47763	0.0446028
1.25058	1.66541	42.4845	5.175	0.0863126
1.7022	2.7788	42.7805	6.2115	0.0456162
1.25848	1.67684	49.9873	11.7878	0.0407324
1.3654	1.71145	31.5765	6.64054	0.0408072
1.33414	1.70959	29.0462	6.30503	0.0474589
0.998051	1.80069	27.2543	11.5604	0.0567006
1.19737	2.34233	31.104	8.21126	0.0403587
2.02075	1.45507	32.5109	5.11778	0.0381166
1.04762	1.68149	21.7097	12.628	0.0475835
2.0695	1.31865	45.2662	12.4779	0.0403587
1.47401	2.19152	29.6882	6.28537	0.0513827
1.78456	1.83347	23.4654	5.12667	0.0752296
1.27107	2.48231	25.7235	5.58803	0.0447029
1.42463	1.77828	25.8468	10.9839	0.073625
1.28804	3.0246	24.1774	14.3132	0.0542046
3.63351	1.48474	37.8701	6.51489	0.112285
1.11209	1.45285	28.2857	5.47111	0.0503165
2.50286	1.37279	24.8629	5	0.0553531
2.40244	2.11079	23.4839	5.72698	0.0459641
1.25	1.41883	22.6198	11.2965	0.0619869
1.50114	1.89821	25.3548	6.42844	0.113672
1.01535	1.54522	41.4655	6.17293	0.0470211
1.80904	1.57878	80.9695	8.78592	0.0430493
1.00585	1.60616	41.9021	7.0415	0.0403587
1.46842	1.29082	31.1904	5	0.071212
1.00975	2.1275	24.674	11.0326	0.0687593
1.23279	1.27706	58.5165	6.10603	0.111734
1.71355	1.54326	39.3265	9.84012	0.0795964
2.18255	1.65805	37.191	6.18333	0.150913
1.50241	2.35112	50.2816	6.53382	0.072754
1.77339	1.99077	23.4731	6.87033	0.0551915
1.09698	2.34453	68.269	6.45198	0.0574617
1.25564	1.23052	22.2581	6.82773	0.0586767
4.44555	1.20563	46.5515	5.71717	0.0743024
1.01023	2.42355	42.0529	13.8998	0.0570302
3.99741	1.5783	24.9613	7.7936	0.0487424
1.16477	2.44026	46.7846	8.66507	0.0639636
1.12969	1.74574	22.3355	5.26349	0.0775689
1.31433	1.28312	27.8865	5.49259	0.04925
0.998538	2.39235	28.7808	15.4625	0.0527726
1.23626	1.53835	23.4968	12.6839	0.0795353
2.13088	1.63612	21.3548	5.87977	0.0381166
2.06463	1.27332	21.1935	5.00556	0.0440517
3.12481	1.34687	31.8378	5.98462	0.0392377
1.11749	1.72584	32.5525	11.0241	0.0783646
1.29172	1.19697	22.8548	12.829	0.0801102
1.72349	2.29098	26.4132	6.62954	0.0440209
0.982456	1.18506	26.246	8.50218	0.0409193
1.03021	1.22727	31.3124	6.10412	0.0428047
1.61629	1.53184	28.7281	12.3877	0.058355
1.29123	1.4431	32.7012	4.93333	0.0505947
1.36274	1.51824	26.6851	12.2976	0.118468
1.84297	1.25541	24.1976	6.51317	0.0514798
1.1775	1.70869	27.3065	10.9882	0.0888779
1.05533	2.13098	60.1745	5.29861	0.0511829
3.51635	2.63598	30.8065	12.9875	0.0474215
1.49204	2.00896	35.9107	10.499	0.053521
1.13791	3.00058	24.6953	5.24376	0.0411061
1.79934	1.36957	29.6798	12.7175	0.110635
1.11696	1.47857	22.6371	7.08509	0.0381166
1.35605	1.43917	24.7627	6.66667	0.0543212
1.88619	2.03247	26.1303	5.75342	0.044677
2.9923	2.69507	41.9683	6.07563	0.0506945
1.03158	1.49134	39.0137	6.3172	0.0744987
1.0636	2.45571	37.3809	16.4546	0.0386771
1.87566	1.24026	21.3145	7.82392	0.0553859
1.18031	1.3037	26.7097	5.57716	0.0413553
1.79652	1.70794	22.3118	8.27105	0.0486422
1.85409	1.93918	36.5622	10.5785	0.0669493
1.0269	2.73581	24.4032	10.6216	0.058723
1.07164	1.40538	39.8085	5.2963	0.0481614
0.994152	1.26055	25.8935	4.9	0.057969
3.42336	1.32143	39.0634	5.01667	0.0520366
1.08081	1.40584	21.8925	4.93333	0.0409193
1.07076	2.91381	22.2097	6.19418	0.0407324
1.4095	2.96483	38.1987	5.78974	0.082476
1.53523	2.05449	23.6371	8.86421	0.0381166
1.50661	1.37593	23.8362	7.27799	0.0589161
1.39265	2.01577	21.6129	6.42171	0.0422806
1.05497	2.81682	23.5726	12.3993	0.0651305
3.39536	1.85246	63.3195	12.9792	0.0606449
1.42471	1.34253	31.6733	5.04444	0.0419894
1.45926	2.16849	21.9677	7.20898	0.0479113
3.44184	3.1369	26.1272	7.85578	0.0414798
1.0402	1.1974	50.5432	5.80148	0.0623532
2.20683	1.20325	51.983	6.16744	0.06663
1.03119	1.52286	26.8233	5.70609	0.0550412
1.14803	1.64177	32.5699	6.61281	0.0548818
1.80384	1.32004	22.5323	5.76146	0.0584279
1.02729	1.2745	23.8423	6.90198	0.0489733
1.97835	1.86924	29.2917	5.11975	0.038864
1.85767	2.14384	40.379	5.05278	0.0717007
1.12178	1.81704	24.206	6.63333	0.113082
1.40424	2.50718	26.2823	8.89411	0.04285
2.13889	1.2132	27.4813	5.75291	0.0386771
1.59645	1.95444	28.6622	6.97109	0.0495252
1.7882	2.26458	66.4902	10.3562	0.0416044
3.34288	1.59828	47.5255	4.93333	0.0413397
1.83543	2.30995	36.1248	8.0154	0.0386771
1.03801	1.38009	25.9279	10.463	0.0381166
1.44776	2.66098	31.8226	8.78874	0.0424141
1.11377	3.52807	23.5261	5.14691	0.0473343
3.41218	1.55864	25.2903	6.64306	0.0396114
1.63532	3.00838	61.7954	5.47451	0.0456438
1.73008	1.91607	58.377	7.25074	0.0512398
1.16464	2.49752	23.7419	5.08611	0.0731256
3.23536	1.73431	21.7849	13.0385	0.0403587
1.53241	1.50043	34.6316	13.5394	0.0495676
2.99134	2.38512	39.2158	5.64667	0.0519966
1.66488	1.23737	43.459	7.72289	0.0459641
1.61374	2.49405	71.9244	6.335	0.0381166
1.80263	1.88825	23.3364	6.46566	0.0656125
1.84756	3.18965	64.3247	8.51395	0.0899618
1.08187	1.25649	22.629	11.5762	0.0920367
1.95548	1.37584	24.3616	6.51603	0.0577621
1.12266	1.2638	25.7133	5.52989	0.0411595
1.2405	1.64016	23.0032	13.1982	0.0620071
1.64649	1.19481	25.1175	14.0291	0.0718712
1.15542	2.38062	23.2516	5.7037	0.0574476
1.48337	1.19913	28.0088	5.06111	0.0458658
1.33729	2.02671	31.4075	5.55903	0.0631974
1.04094	3.17943	29.9834	6.93802	0.0521033
1.35268	2.30602	32.1902	5.43951	0.0399851
1.13758	1.37049	39.4683	11.7077	0.0496477
0.982456	1.40854	45.4191	5	0.0695898
3.58115	1.86844	34.7078	6.00787	0.0626484
1.30166	1.24575	25.2157	8.96667	0.0782424
1.72071	1.20779	25.2491	6.85455	0.0720336
1.68623	1.48273	35.704	9.11385	0.0478326
1.35473	1.89922	38.6839	6.50778	0.0444694
2.29881	1.38951	29.3983	8.91449	0.0408072
1.6634	1.78462	25.7358	7.76956	0.0445793
1.1879	1.17532	61.8074	6.03219	0.0409193
1.40994	1.4697	25.0968	5.01389	0.0487295
1.2307	1.48695	24.7849	5.08056	0.0643115
1.60612	1.17532	24.3344	9.025	0.0678998
2.06336	1.80597	27.4613	10.7892	0.0607569
1.1967	1.75818	27.2306	10.6498	0.0588565
3.09852	3.02678	70.612	11.8551	0.0604362
1.2684	2.13072	24.5015	8.31876	0.0472987
2.71979	3.69232	64.1904	6.34352	0.129263
1.29521	1.5987	25.5	6.00169	0.0453769
1.14815	1.19481	22.8495	5.79201	0.0843843
1.25774	1.48562	22.8629	11.4009	0.0580397
1.27755	1.35988	62.8673	4.95556	0.0472032
1.3479	1.34826	33.7947	5.71058	0.0499039
1.59379	1.97959	23.4516	5.40556	0.0466775
0.988304	3.17992	32.1487	6.00877	0.0465727
1.39222	1.30844	22.1613	4.93333	0.0670544
1.07018	1.82722	23.1452	11.3787	0.0606356
1.32325	1.40468	23.4885	6.1662	0.0551306
1.37962	1.42208	26.2903	5.95057	0.0731456
1.63982	1.81331	23.5444	5.08413	0.0392377
1.1663	1.54343	21.3548	5.88819	0.0658751
1.26576	1.67031	67.2282	7.31574	0.0434633
2.09534	1.33308	24.8427	6.59252	0.0477578
1.77897	1.73052	25.1048	11.5508	0.0434978
1.05336	1.62898	22.6613	11.4042	0.138644
1.17084	3.25471	28.8332	6.11981	0.0489121
1.97548	1.99685	34.1651	8.33904	0.0403587
1.63619	2.61214	23.8836	6.00818	0.0669588
3.36879	2.09955	27.1828	7.0294	0.0393978
1.62929	3.01127	27.6144	5.24444	0.0381166
1.72058	1.21266	28.6439	6.55451	0.0494104
1.14254	1.23782	24.765	4.93704	0.0536195
1.23764	1.50138	31.2202	7.06389	0.0479821
1.26072	1.44113	23.6559	10.6204	0.0480194
1.08944	1.44697	28.9565	5.52026	0.0440423
3.15568	1.2013	31.5419	11.9328	0.0604806
1.86686	1.29716	28.75	5.96257	0.0546525
2.50311	1.66739	33.1186	6.12222	0.0390134
1.07921	2.08651	32.3136	9.95625	0.0666051
1.20312	1.27922	24.6925	5.10278	0.0505552
1.28099	1.21104	35.5854	6.74875	0.0711883
2.15505	3.19118	32.8736	7.35933	0.0488962
1.4353	1.90659	22.8848	5	0.0503683
1.01637	1.695	27.2304	14.6065	0.0644039
2.16716	1.85798	50.6829	13.3686	0.0456344
2.3082	1.20238	28.5078	7.89427	0.0397982
1.19144	2.78104	23.9109	5.87658	0.0674595
1.80438	1.29048	24.7453	6.38812	0.0498505
3.19934	1.886	33.4176	8.08208	0.0434978
1.04386	3.65685	27.3944	8.18787	0.040857
2.83712	1.35633	23.2151	4.97037	0.0416777
1.24972	2.3175	24.6017	5.59259	0.0482424
1.75319	1.84754	23.2151	12.0202	0.0641349
1.03216	1.37322	47.6228	7.35179	0.0434633
1.28005	1.77066	34.0364	5.66667	0.0390775
0.976608	1.52991	51.7219	14.6612	0.0381166
1.52202	1.18831	22.3952	13.1234	0.0414798
1.17227	1.22078	34.0006	6.25401	0.0381166
1.12025	2.15888	23.2944	11.5014	0.0956196
2.62903	1.19221	22.0887	10.6748	0.0795644
1.15741	1.25108	44.9406	10.9663	0.0563808
1.25489	2.34242	22.671	5.15778	0.0426009
1.10071	2.34811	23.7302	12.1642	0.0607913
1.11377	1.28355	26.7097	5.44831	0.0455565
1.29771	1.41837	23.3978	5.25802	0.058709
1.22361	1.39367	21.6129	11.5534	0.0609118
1.9489	4.28121	37.5542	5.37193	0.0514676
1.47342	1.41797	22.0161	6.22509	0.0726802
1.07071	2.56057	54.2694	6.19333	0.0530176
1.26852	1.46921	52.6988	5.30926	0.0592642
1.32378	1.28274	67.552	6.19192	0.0730206
1.38446	1.85161	35.2694	5.76732	0.0411061
1.24332	1.27029	22.414	6.99742	0.0436472
1.12549	1.69175	61.85	6.29158	0.0741229
1.61009	2.80298	48.5739	5.75299	0.0645029
1.17925	2.7405	23.0806	6.15586	0.111412
1.35126	2.03734	26.7209	5.17963	0.0727098
1.4911	1.60552	22.3333	5.34667	0.0675253
1.29277	1.61688	33.5538	5.09333	0.0424608
1.7736	1.28283	24.8513	8.76325	0.0453706
1.11005	1.31346	22.1371	11.8022	0.0462844
2.02228	1.38424	44.4205	6.25049	0.0499039
1.23327	2.80687	22.6532	10.9662	0.0414798
1.08699	1.26391	22.1371	15.4878	0.0615969
1.5462	1.3971	25.0088	5.63755	0.0677671
1.09463	2.35669	21.5645	5.81333	0.0474929
4.30612	2.36851	24.2806	4.94815	0.0960725
1.00195	2.59506	25.4822	5.26444	0.101981
1.06108	1.43539	35.6244	5.01481	0.0603388
1.03704	1.96296	39.4516	5.06667	0.0873094
1.88389	1.30819	24.0968	6.5832	0.0677797
1.64874	1.23377	57.9188	5.21111	0.0392377
1.09825	1.65195	24.8351	5.24514	0.0420404
1.70317	1.37544	61.187	11.0308	0.0489876
1.23769	1.20292	59.5616	6.13679	0.0436259
1.30164	1.66944	37.2475	10.3059	0.0381166
1.14181	2.90476	30.8145	4.9	0.061857
1.31646	1.57979	30.2102	8.90311	0.0552317
1.27499	1.33403	29.89	5.76794	0.0448431
1.36121	1.78089	39.1653	5.21389	0.0460003
1.31016	1.49853	30.2725	5.17407	0.0439462
1.05681	1.24675	31.5798	5.68632	0.061499
0.994152	1.23232	27.1593	4.93333	0.04164
1.18392	1.18506	49.5496	8.29017	0.0450409
1.15741	1.30331	34.9004	5.41818	0.0438465
1.534	1.2769	25.659	11.3207	0.0414798
2.24312	2.63331	32.4384	7.56717	0.0386771
1.67848	1.42884	32.0819	10.7892	0.0381166
1.47157	2.48984	22.9355	14.0087	0.0572909
0.976608	1.59903	49.6951	11.2458	0.0392377
1.11028	1.3039	22.5323	10.9577	0.0429966
1.43582	2.11224	41.4183	5.52667	0.0438465
4.51887	1.18182	48.5419	5.65509	0.0397982
1.36435	3.4043	60.7314	13.0686	0.0563988
1.48679	1.46028	31.8828	16.0506	0.0663945
1.01072	1.34416	28.9076	7.21123	0.059584
1.04971	1.27489	21.7634	5.4373	0.041911
1.01901	2.23684	40.2288	11.9673	0.0483308
1.0117	2.48872	58.7922	13.4931	0.0465576
1.49213	2.93166	29.6337	11.5993	0.0544153
3.41547	1.22171	24.5892	5.37778	0.0586163
1.52462	1.53734	24.2978	9.81614	0.0696086
1.54011	1.22511	27.318	6.68835	0.0428047
1.57152	3.69338	65.3696	6.32508	0.059208
1.57496	1.25881	21.7258	5.5807	0.0544423
1.12448	1.62762	27.445	5.97003	0.0664435
1.49435	1.34091	26.6902	5.25926	0.048512
1.27829	1.24675	22.4355	12.8678	0.0392377
1.17499	3.40114	28.5054	11.4843	0.0390775
1.66191	1.41688	31.5671	7.00803	0.0469533
3.0616	1.24107	21.4839	12.2347	0.0562708
1.38331	1.61688	22.8495	6.93118	0.0465247
1.45236	2.6166	48.9978	7.86472	0.0492299
3.65141	1.30909	27.6398	9.0648	0.0718669
1.17591	2.83271	24.0829	13.6218	0.0482063
0.984405	2.0915	33.0622	6.61326	0.0703978
3.59235	2.01546	22.6037	5.59074	0.0411061
1.2511	1.26786	21.9677	5.52321	0.053379
1.12632	1.30476	31.3097	4.91111	0.0470852
2.21724	3.85501	22.172	4.96667	0.063161
1.52918	1.2316	26.2215	11.3724	0.0381166
1.05556	1.77987	76.9589	5.69822	0.0484184
2.39017	2.62408	24.8759	7.64858	0.046587
1.12346	1.40399	26.5887	11.6595	0.0738487
1.78933	3.45121	27.8327	13.4207	0.0464952
1.24584	1.27557	76.5014	6.77671	0.0811276
1.21442	1.61623	27.7509	7.26471	0.068786
1.17251	1.42651	35.7856	9.74694	0.0498612
2.38419	2.48709	54.0889	7.52506	0.0395179
1.92353	2.92561	54.1873	11.8062	0.0486082
1.37409	1.53211	22.0538	6.71992	0.109865
1.7382	1.39232	24.5516	4.96111	0.0653186
1.84218	1.48544	36.1771	7.79689	0.04285
1.03509	2.47312	82.0199	9.58958	0.0589603
1.56741	2.32598	25.4839	9.15347	0.0692265
5.53915	2.8585	23.8774	6.05432	0.050299
1.1193	1.89906	34.8853	5.01111	0.0414798
1.32142	1.21429	27.4827	4.9	0.0479821
1.01365	1.81971	22.1774	5.87437	0.0431105
1.35298	1.18182	23.665	6.27088	0.0516375
1.2934	1.20022	27.5847	4.98066	0.0563413
0.976608	2.56584	27.448	12.1198	0.0772781
1.29974	1.27468	25.8528	6.88323	0.0481262
2.96582	1.9419	32.9914	7.93758	0.056469
2.23184	1.20649	44.279	6.18565	0.052483
1.20106	2.80751	35.4688	7.27808	0.0479476
1.62058	1.79403	23.7677	5.71765	0.0553639
1.49011	3.07197	25.4535	9.72554	0.0835409
1.18674	1.32189	28.8533	5.98346	0.0421932
1.31774	2.42751	27.9384	6.8227	0.0539757
1.06287	3.59531	82.0201	16.4726	0.04667
2.29825	2.78047	23.2863	6.05746	0.0462228
1.10448	1.18831	36.0506	5.94878	0.0674166
2.88588	1.54814	31.9846	5.35802	0.0749539
1.53385	1.18182	26.9211	10.8133	0.0430992
2.04951	1.40121	56.7579	5.51956	0.0715374
1.02242	1.24756	37.5564	14.7937	0.0539362
1.07675	1.27958	53.1628	12.7532	0.0468814
1.5291	1.80366	27.6852	5.54211	0.0483024
2.0306	1.4655	43.9724	10.5665	0.0714686
3.26378	1.21753	32.1323	9.18751	0.0467115
1.50714	1.31523	83.2711	6.8137	0.0381166
1.2422	2.65182	21.9194	5.80288	0.0418001
1.22343	1.36395	77.959	5.49383	0.0433808
1.05906	2.12393	33.5698	6.84437	0.0520179
1.20941	2.23342	34.1935	5.03056	0.0629404
2.2496	4.10988	23.3185	6.94239	0.0648037
1.10643	2.7765	24.0599	5.8298	0.0658872
1.20078	1.25866	23.0553	13.5471	0.0469034
1.85334	1.28052	36.2419	4.92222	0.0711822
1.78562	1.5449	51.6254	10.4588	0.0410182
2.35917	1.42208	21.2258	8.50973	0.0496723
1.06433	2.11246	39.0476	5.00741	0.0664126
1.02485	1.68008	42.3087	6.84023	0.0639876
1.19439	1.29545	21.9355	4.98333	0.0435618
1.61122	1.51082	23.7774	5.10606	0.0892254
1.42267	2.67046	34.8504	13.6176	0.04787
1.39337	3.07709	27.6144	5.44691	0.0607151
4.67182	1.40816	34.9055	5.80821	0.050395
1.88151	1.61934	23.7537	6.2562	0.0381166
3.99888	1.39513	22.1161	8.18854	0.0535874
1.10256	1.56592	29.8978	16.3525	0.0417601
1.29398	1.38442	25.8602	10.446	0.0723637
2.51486	1.24481	24.2452	12.7464	0.0497544
1.15686	2.40874	48.5134	5.05833	0.0435974
2.83653	1.32888	30.5141	6.60662	0.0521732
1.34078	1.77933	51.6324	12.4384	0.0447112
1.19608	2.97256	22.6095	5.28571	0.0576794
1.33705	1.27056	25.0764	6.0716	0.0956652
1.11566	1.75354	73.1828	13.8822	0.0396114
1.01871	3.37468	39.7687	11.5711	0.0423019
1.00585	1.6778	19.9247	7.15581	0.0687722
1.07927	1.28766	21.7137	6.61961	0.0517241
3.2371	1.24935	29.2563	5.49225	0.0381166
1.96784	1.24351	39.7413	5.44691	0.0851317
2.39048	2.77808	23.5641	10.6444	0.0539747
1.14886	1.39524	34.3131	9.00222	0.0445373
1.04211	1.97205	19.2419	7.08155	0.0406791
1.25091	1.18182	22.9677	5.57115	0.0491235
1.14425	1.37801	78.2159	4.9	0.099475
1.32055	2.01031	55.2626	5.31616	0.0381166
1.17271	1.23214	37.4696	5.40079	0.0615573
2.2406	1.34253	65.2963	5.44033	0.0392377
2.45277	1.62256	33.0211	9.57608	0.040857
1.88368	2.08282	39.2232	11.6192	0.0641763
1.07041	1.36494	18.129	11.9688	0.0599233
1.07544	1.18831	41.616	7.57371	0.0381166
1.10739	1.81027	18.7419	7.82273	0.088506
1.71392	1.58879	29.1902	9.04827	0.0596334
4.26914	2.25428	19.8065	5.31795	0.0565838
1.22068	1.6759	60.8662	10.6383	0.0449676
1.88853	2.95892	21.3226	5.06667	0.0495142
1.09759	1.18182	21.3702	13.4775	0.0784262
1.30252	1.41854	25.7519	6.02626	0.0421525
1.25731	2.98123	19.0645	5.02222	0.0921493
0.988304	2.31688	18.6903	11.7106	0.0445019
1.13175	1.47443	18.8323	5.62311	0.0505504
1.00146	2.93224	19.1935	6.57639	0.0401345
1.333	1.64044	20.1237	5.55802	0.0413553
1.61936	2.03426	18.879	6.77061	0.0403587
1.32478	2.063	26.1017	13.5879	0.0381166
0.988304	2.43779	20.1584	5.66437	0.0381166
1.09844	1.57688	20.9424	7.53622	0.110798
2.14271	1.68182	21.4069	7.14579	0.0507988
1.01462	1.38664	23.9016	5.45778	0.0543903
1.29327	1.70965	46.3193	4.95926	0.0428251
1	1.33666	18.4946	5.85333	0.0381166
1.08723	1.36558	21.543	6.89377	0.0635601
1.81249	1.52581	25.3586	9.6294	0.0556178
1.88227	2.44815	50.9942	6.33763	0.0535693
1.16053	2.17363	35.7465	7.46754	0.0433483
1.58918	1.29531	19.6959	11.0543	0.044416
1.76904	2.9559	19.6057	5.48333	0.0413197
1.26468	2.25303	45.9285	7.15015	0.0436201
1.45879	2.98962	40.6516	5.9619	0.040583
1.07337	1.52474	20.9219	7.19383	0.0430493
1.63714	1.21537	26.5682	5.44359	0.0392377
1.19703	1.22727	43.8019	5.50606	0.0578112
2.06752	1.54341	19.8774	10.333	0.0610331
0.997076	1.37319	19.9355	5.64211	0.0548228
1.42869	1.43584	25.3576	9.28739	0.0658729
1.31498	1.35747	22.3462	4.92222	0.107796
1.20489	1.45484	44.5733	11.7331	0.0635692
1.29544	1.28272	19.5605	6.35616	0.050093
1.31464	2.03405	21.6012	5.20635	0.0520678
1.68031	2.00573	18.2419	6.10088	0.0476831
1.42425	1.43684	28.0532	14.9802	0.0403587
1.27577	1.52876	23.2877	10.4966	0.0617278
1.17885	1.67064	24.436	5.24938	0.0507032
1.69726	1.49509	27.0315	5.27407	0.057315
1.05792	2.00141	19.8172	5.1	0.0426009
1.10792	1.17532	42.4861	5.2537	0.0614893
0.976608	1.49176	25.233	8.74333	0.0549566
1.34016	1.25561	19.61	7.02632	0.0418535
1.15952	2.6715	19.1008	5.84815	0.0548168
1.21422	1.70235	28.913	14.7364	0.0420404
1.15863	2.42488	27.3478	5.42092	0.045233
0.994152	1.19913	45.5779	8.00993	0.0544345
1.04532	1.23976	39.9375	6.39802	0.0553064
0.988304	1.19805	34.7661	6.75218	0.0605381
3.15888	2.53352	42.8922	6.32137	0.0661435
1.89669	2.15285	22.9145	6.20214	0.0545075
2.02359	1.27561	20.4355	11.961	0.0418535
1.08596	1.40038	21.377	8.64523	0.0396114
1.87656	1.20942	36.7094	5.30556	0.0660314
1.56994	2.73489	19.3825	5.34379	0.0560986
1.77741	1.77536	24.3202	5.67778	0.0392377
1.54072	2.4503	22.4172	9.20283	0.0522338
1.23113	1.44716	28.1859	12.1127	0.0421932
1.34322	2.14506	37.2357	4.98889	0.0479961
1.01608	1.34792	19.4194	5.37639	0.0909168
1.94175	1.88646	36.2174	4.98889	0.0602913
2.92318	1.72805	18.5645	13.399	0.0688839
1.165	2.93216	33.1719	10.072	0.0908906
1.26754	1.20455	24.4355	5.62847	0.045441
1.06901	2.13563	26.8095	6.97252	0.143006
2.09815	1.62236	19.9677	6.27327	0.041704
1.03606	1.19913	43.7267	6.47535	0.0575842
1.05146	1.29004	58.5015	7.10931	0.0582159
3.21201	1.17857	18.5968	6.28214	0.0381166
1.01587	2.24613	34.1782	5.61667	0.0588395
1.04751	1.43489	51.5666	5.14444	0.0539435
1.35038	1.72565	18.1935	8.07576	0.0789353
3.01493	1.24026	35.3882	5.26209	0.0443448
0.982456	1.56533	23.0608	14.7866	0.065583
1.55476	1.78256	19.3871	5.32222	0.0662964
1.21442	1.38823	23.4184	6.91313	0.0629959
1.14833	1.5	20.9054	5.13611	0.0629796
1.53731	1.27922	40.2459	5.46235	0.0614428
1.42975	2.04198	30.7899	10.9994	0.0414798
1.27946	1.39389	18.5	5.71154	0.0450922
1.07135	3.11778	45.0476	6.09927	0.080462
2.41653	1.32403	26.278	9.7335	0.0490686
1.35608	1.61382	23.4685	8.02222	0.0423767
3.00954	1.48122	18.4946	5.57778	0.0827618
2.64991	1.83106	58.9255	5.26429	0.0381166
1.63433	2.17164	35.7402	7.86811	0.0624762
1.36743	1.60936	24.727	5.03056	0.0456901
1.42357	1.62078	19	7.91879	0.0386771
0.982456	3.04717	43.7171	9.74622	0.0435181
1.34993	2.81612	20.7763	8.02801	0.0422806
1.49139	1.77699	26.88	6.45118	0.0448431
1.62183	1.36916	22.3719	5.26444	0.0392377
2.40927	1.28325	22.3855	5.9548	0.0780789
1.29064	2.05051	18.8249	4.94444	0.0809835
1.69091	1.70171	20.273	8.57339	0.108587
1.07811	1.36169	23.6682	7.36932	0.0624167
1.06969	1.94409	26.8387	9.23902	0.0801175
2.23747	1.60642	19.3747	8.7698	0.0463378
1.40723	1.69426	18.9194	5.75214	0.0384369
3.2057	1.42532	44.5204	6.62857	0.0409994
2.87837	2.77742	18.0645	6.9625	0.0567015
1.12378	1.44156	18.929	4.96667	0.0426009
1.73296	1.33627	24.7111	5.83704	0.0857682
1.7222	2.27611	19.7339	5.82639	0.0412556
1.34067	2.48392	18.5484	6.39611	0.0527963
1.33024	2.33796	19.0323	6.25802	0.038864
2.26566	2.76438	34.1396	5.08519	0.0381166
1.18408	2.28613	33.7806	12.977	0.0399511
2.35626	2.15171	31.0839	7.34314	0.0736707
2.12568	1.88528	25.1023	11.0424	0.0433483
1.22612	1.69902	44.4289	14.9638	0.0488789
3.09425	2.12616	27.8504	16.8482	0.0505018
1.07895	1.48436	19.2903	12.2056	0.0432833
0.997076	1.81885	18.4032	15.6343	0.0589126
1.38735	1.65265	20.6833	9.24118	0.0392377
1.10283	2.35475	19.3763	7.89265	0.038864
2.02339	2.36993	22.4871	16.9481	0.0590018
1.22835	3.14296	24.6585	7.45588	0.0461156
1.14215	1.20238	28.3583	16.3073	0.0418535
1.21832	1.40623	18.8618	7.81471	0.0392377
1.38596	1.40362	18.5215	13.4172	0.0565848
1.33936	1.33853	18.3871	12.7238	0.0515695
4.14322	1.89568	26.6475	16.2201	0.038864
2.89829	1.39117	31.5161	8.99599	0.0411741
1.99568	1.58117	23.6422	16.4935	0.056773
1.55556	1.66985	22.7533	15.592	0.0755251
1.84882	3.18571	19.2366	12.5141	0.0539071
1.66472	3.17094	24.0548	8.03463	0.0451355
2.24271	1.22403	18.9624	8.32243	0.0381166
2.62007	1.98328	29.3529	7.46324	0.038864
1.57139	1.72133	20.3629	7.13725	0.040583
1.39474	1.42938	19.5914	6.97059	0.0399103
1.29264	1.21537	54.159	8.87557	0.0445628
1.11001	1.24026	19.4395	13.8103	0.0548024
2.19725	1.43352	21.3182	7.06618	0.0519772
1.54102	2.0897	19.1613	7.02941	0.0490071
2.1835	1.19805	23.6774	7.21029	0.0442825
1.67465	1.7619	50.5711	16.4558	0.0496148
1.33509	1.36219	44.1044	7.38889	0.060805
1.15873	1.38481	24.0784	10.0561	0.0617752
1.10211	2.16076	45.8742	10.9562	0.038864
1.22635	1.6556	20.6824	7.79085	0.0381166
1.26734	1.19156	18.4355	10.0826	0.0423767
1.10359	1.30969	22.6258	8.71886	0.0392377
2.64606	2.64811	19.5524	9.42233	0.0932187
1.46199	3.11924	34.1309	9.4591	0.0426009
1.20776	2.36403	80.1279	10.3553	0.0484945
4.69328	1.3474	31.16	7.61765	0.0776746
1.69744	1.18398	20.2387	7.47206	0.0657536
1.16881	1.82032	26.7433	12.7391	0.0508796
1.60351	1.2362	18.3226	9.2234	0.070583
1.15045	1.82457	23.8031	8.91597	0.0401345
1.28882	1.53369	19.3812	9.54525	0.0797049
1.75193	1.31319	52.7357	7.96706	0.0662332
1.17178	1.19481	24.0421	7.81458	0.0606061
2.76621	2.7963	19.2473	13.2687	0.0398605
1.07407	1.21429	21.9229	12.696	0.0621497
2.12365	1.28372	62.2852	9.66765	0.0624002
1.10599	1.2013	27.7922	14.2791	0.0525411
1.74672	1.91946	21.2235	7.69582	0.0813403
0.986355	1.17532	22.4602	16.5719	0.0796983
1.62898	1.2974	18.1613	8.03824	0.0455904
1.40528	1.25278	30.6032	7.90398	0.0381166
1.75645	2.12936	48.7389	11.328	0.038565
1.44991	1.26012	28.9131	7.24559	0.0579343
1.03436	3.64272	27.8056	7.72995	0.041704
1.52774	1.31013	24.807	9.18842	0.0611935
1.06199	1.7572	19.0452	7.17157	0.0423371
1.30393	1.46443	53.4755	9.62264	0.0608998
1.13868	1.93131	24.6925	8.55147	0.0419894
2.02219	1.23571	20.086	14.846	0.0525207
1.0117	1.67558	19.1161	7.84143	0.0557508
1.43124	1.27237	23.9303	7.25	0.0394619
1.04971	1.22208	19.4355	8.5342	0.0956476
1.3495	1.2592	22.9384	7.11029	0.043545
1.49628	1.26705	40.1471	11.7286	0.110651
1.30695	3.20415	20.5104	7.32353	0.069795
2.91688	1.75158	55.8644	10.3805
2.16797	1.2013	46.9462	9.45866
2.10571	2.08534	18.5484	8.60591
1.50982	1.72095	20.4032	7.622
1.11085	1.30141	19.1935	7.21324
1.08733	1.77483	20.7921	12.7531
1.26817	1.24852	19.2995	15.0216
1.85816	1.2381	35.3707	8.4282
1.37044	1.26082	19.729	13.2522
1.35864	2.01399	32.5868	6.98529
1.10021	1.26531	73.6395	8.19586
2.95306	1.21266	21.9591	7.72721
1.08041	1.41369	20.3145	7.30719
1.04795	1.39918	58.3564	9.39661
1.01023	1.20455	23.9481	7.19118
1.04795	1.17532	32.0237	11.1999
1.47928	1.76684	25.3526	8.37173
1.32833	1.70033	39.8755	10.0126
2.27884	1.20779	59.5411	13.6022
3.68334	1.27458	26.5346	7.0098
1.06486	2.43328	21.3871	9.10181
1.72307	2.19395	19.0323	8.75919
1.8855	3.07553	21.9063	7.58186
1.27632	1.55788	19	8.96929
1.82956	2.10537	21.4301	7.68199
1.24366	1.18831	20.9516	7.15686
1.18078	1.23908	25.1688	7.95915
1.50221	2.73807	24.5298	7.08824
1.91768	1.3892	24.2419	10.2491
1.03119	1.97779	20.1352	9.10472
1.05088	1.32113	21.1523	11.1798
2.58957	1.43506	19.0783	9.48203
2.13835	2.77205	57.9961	7.55882
1.0269	1.48133	47.9192	7.48004
1.02827	1.41913	28.0417	10.8497
1.14347	1.52823	25.7998	10.7629
3.43855	1.2013	18.1774	11.6442
0.982456	3.16893	22.6672	13.8307
2.07529	1.8813	22.2903	12.7569
1.18758	2.88518	19.5985	7.15441
0.976608	2.25556	23.0783	13.5475
1.25468	1.60615	30.3613	7.47386
4.64967	1.74151	23.0938	8.26389
1.08577	3.41817	30.9814	8.05305
1.02506	2.33084	43.5305	17.7899
1.51939	1.97869	20.5591	9.99151
1.10721	1.25902	20.9597	7.18627
1.16608	2.29131	18.7419	10.2092
1.01365	1.68065	21.5774	9.31781
1.71821	3.12041	35.7506	7.24055
1.1542	2.97697	20.1541	17.4336
2.71084	1.74667	29.1835	12.5882
1.27827	1.38167	44.0117	7.16912
2.28008	1.37063	28.0811	7.24387
1.31959	3.38904	27.8548	7.31029
1.33467	1.67743	34.2897	7.18583
2.08656	1.2619	20.3157	8.35633
1.62988	1.18182	27.7856	7.72689
1.81355	2.76368	18.7903	9.42505
1.67711	2.37227	18.9516	18.8444
3.13345	1.59809	20.261	7.19485
1.22327	2.49587	19.129	8.77849
1.43926	1.17532	69.0019	15.7104
1.25852	2.34794	21.4355	7.9375
1.21143	4.81124	21.7763	10.0157
1.19396	2.15983	36.0978	16.015
1.06238	1.27087	27.7718	9.11013
1.71588	1.40683	27.4301	7.07059
1.35367	1.54892	22.055	7.60142
1.78796	1.93557	46.8042	8.38761
1.24826	1.54654	31.1146	7.83983
1.07018	1.26902	35.9208	9.73977
1.14932	1.89577	22.5996	11.8677
1.07226	2.99104	23.1452	7.85863
1.27795	2.1213	23.0988	8.07292
2.70189	1.61932	40.1462	10.6562
1.86868	2.37137	21.0605	7.27451
1.26072	2.03528	20.6704	9.84034
1.50029	1.19156	27.192	14.3496
1.27377	1.20649	18.1935	15.6793
3.23335	2.25593	18.129	9.56917
2.36374	1.76278	26.1211	12.7728
1.99578	2.79556	26.6961	7.95412
1.73991	1.38379	26.2312	8.98745
1.10359	2.86075	49.4225	10.9309
2.80089	1.34892	35.3895	12.7517
1.0269	1.36774	27.381	7.74434
1.74854	1.21916	30.238	8.51509
1.42646	2.51953	23.5438	10.5926
2.35652	1.86769	42.7109	7.56863
1.13294	1.64442	23.0245	10.7604
2.53651	2.5004	67.9569	9.89358
1.26088	1.42143	21.3525	8.60294
1.29401	1.7098	19.2995	11.2477
1	2.39415	56.0636	7.40441
1.30448	1.28571	19.5023	13.8997
1.62243	2.04717	26.037	9.73363
1.87905	1.23485	33.2888	11.8862
1.4992	1.26364	19.9065	11.5228
1.53651	1.57792	19.5538	13.1039
1.24083	1.28653	23.8232	16.5963
1.06725	1.41864	20.2516	12.9956
1.7808	1.20346	19.1613	7.20069
1.09623	1.21591	18.7339	12.5752
1.3554	1.19913	34.7331	8.53221
1.22146	1.25379	36.508	7.57143
1.14805	1.40496	33.042	7.22059
1.50397	1.8759	28.5477	10.4385
1.65716	3.43548	37.2923	10.6319
1.56165	1.48122	21.5605	11.73
1.30343	3.91864	96.0572	7.06618
1.48936	1.2013	19.2903	8.1477
3.27935	1.59784	18.7143	7.30392
1.50387	1.99801	22.0374	8.52689
1.13638	2.4574	50.2493	8.58645
1.01838	3.65346	58.6264	8.56287
1.04059	1.71841	48.5642	7.70844
1.17293	1.75595	26.8862	10.8798
1.57972	1.47426	36.3093	9.66085
1.4658	1.27192	31.2609	12.2862
1.34503	1.34242	19.0081	7.69235
1.63899	2.31309	19.1419	9.68601
1.37582	1.18182	23.1309	9.44601
0.994152	1.21861	20.5668	7.89191
1.18713	2.64228	18.5323	7.57017
1.65275	1.37634	19.254	7.47059
1.07115	1.26786	26.8049	8.38971
2.70701	3.32351	34.1891	8.69118
1.70029	1.95974	21.1855	10.4281
1.27018	1.48909	32.8359	14.2135
1.22345	1.54917	21.8696	15.311
1.08772	2.03568	21.8274	8.50606
1.57121	1.8176	46.4027	7.27647
1.05692	1.31926	58.777	12.8176
1.17918	1.65184	58.0086	8.11176
2.19487	1.29351	39.2913	8.36189
1.35702	2.15989	25.2142	12.9505
1.21972	1.519	38.1908	12.1822
1.91425	1.37784	35.1928	9.40058
1.86001	2.67733	49.5917	7.52437
1.08931	2.31606	18.871	12.466
1.42089	1.46176	69.2267	8.76404
1.37248	3.27298	19.2903	7.10784
1.15351	1.19156	20.7849	9.80481
1.27995	1.37135	18.5161	12.6336
1.91859	2.01034	43.3607	8.83988
1.18421	3.64041	22.5737	10.4161
1.00585	1.75205	24.538	13.6754
1.03592	2.02886	40.5625	9.85096
1.24248	2.14465	39.0151	13.0418
1.71734	1.70942	18.4839	7.6271
1.2117	1.75069	18.8581	10.1616
1.61573	1.20779	19.8589	8.53502
1.07602	1.43861	21.114	7.20261
2.36973	0.974432	19.5355	7.61195
1.40512	1.56778	25.8682	7.6636
1.03743	1.04205	70.5786	7.06373
1.02423	1.99934	32.3475	7.02941
2.16197	2.71259	22.9242	7.95928
2.11325	1.2577	19.0543	9.41056
2.60616	1.65329	52.4448	13.4605
1.02485	0.930303	19.0161	9.00327
1.51449	0.960065	23.1169	9.78091
1.4047	0.942424	24.6817	7.30588
1.41484	1.77082	79.446	18.1648
1.31011	2.32313	20.0323	7.95997
1.22515	0.874242	20.4562	12.8426
1.81693	1.95307	22.1176	9.22757
2.92501	1.00379	36.0876	8.51654
2.2753	0.804545	29.1314	10.421
1.82054	1.40207	23.3132	12.5679
1.36913	2.38271	40.157	7.41299
1.44729	0.9375	74.2761	7.1152
1.0999	1.26178	19.3355	14.3424
1.47225	1.61093	32.6697	10.0666
1.27799	1.42699	26.1589	10.1708
1.05718	0.883333	36.364	7.16667
2.08197	1.61122	19.6221	12.9056
2.01051	1.83833	20.5694	8.14591
1.37067	3.28102	18.4516	7.28476
1.1381	1.26767	24.7458	9.89357
1.21121	1.65376	20.563	8.69
1.00585	1.22792	21.2855	8.16912
1.27708	2.70213	21.1912	7.05882
1.08825	0.885714	19.5484	10.2551
1.18531	1.32999	32.7293	7.38051
3.25125	0.960963	21.627	12.1596
1.16667	1.17887	27.067	10.8369
1.41487	2.06121	51.0074	20.1715
2.82828	2.03555	64.4455	7
1.28725	1.18148	22.4456	6.97059
1.06092	1.2063	36.8058	11.4699
1.15915	3.03337	27.3191	7.4895
1	1.0101	39.1367	14.3109
0.988304	0.802273	33.2401	8.60238
1.70309	1.38522	19.7137	14.1661
1.14861	1.40931	18.9462	8.89706
0.998051	1.30909	68.9207	7.93048
1.32519	1.6821	71.0741	16.5513
3.17401	1.02845	21.5009	9.62559
1.23637	1.27699	23.4546	9.5257
2.60158	0.95142	44.9427	12.0083
1.04898	0.8	19	7.20956
1.06316	1.79463	22.0576	9.89834
1.25997	1.24734	31.2236	6.99265
1.21172	1.29119	24.9618	7.53595
1.18056	1.2786	51.3218	7.13971
1.20122	1.75673	22.9194	8
1.39743	1.26172	25.0906	10.2331
1.86041	1.28335	22.8827	8.2939
1.12418	1.92005	20.8129	9.08978
2.18755	1.30968	20.1855	7.02206
1.0924	1.40789	20.233	9.72647
1.00585	0.815909	23.7428	7.07143
1.51252	1.53218	20.7214	7.42463
1.03509	2.45463	19.1701	7.21324
1.34028	1.40988	26.4946	12.3213
1.16889	1.30699	21.4055	7.57353
1.06498	1.03506	22.2624	9.71893
1.30167	2.63471	20.478	9.63174
1.33414	0.88843	22.1365	8.06471
1.46418	1.15835	64.6424	7.32059
1.18129	1.11422	19.9862	12.7115
1.12671	0.974621	18.8548	7.69118
2.78571	1.1698	28.045	8.56373
1.68596	0.819091	18.8105	10.5441
1.11005	1.0555	20.1801	7.59375
1.10939	2.00485	24.3002	7.11029
3.14694	1.77964	26.1882	7.48529
1.11696	1.49667	22.6114	7.60121
2.00605	1.11791	25.6284	14.7643
1.50015	1.67266	39.6048	9.52507
1.37837	0.900413	30.8081	9.60409
2.57248	1.25517	34.0247	17.1198
1.04094	1.11274	18.4516	8.26207
1.22754	0.892657	26.9149	8.48229
0.976608	1.23744	25.6462	17.3167
1.09064	0.864935	56.5361	7.90857
1.06725	0.809091	27.9654	8.95996
1.76647	1.83827	26.0518	8.55259
1.48763	0.907343	61.7948	16.699
1.11445	1.95389	23.1652	7.01471
1.10526	0.902727	20.4817	8.45588
1.11662	1.72162	19.5269	7.43627
0.98538	1.09572	18.3763	10.7964
2.60282	0.95303	18.3226	16.8078
2.41119	0.816667	18.7806	6.97059
0.994152	0.818182	18.9161	7.46875
1.4258	0.886364	20.6365	7.21471
1.38375	2.1613	25.0484	7.36471
1.3639	0.918687	48.2643	7.7872
1.46235	0.827273	22.6022	7.42979
1.28538	1.93793	36.9038	7.65709
1.28123	1.26818	41.7722	7.01471
1.12448	1.44692	25.3871	7.2
1.30688	1.5963	30.0835	7.01471
1.33219	1.20847	21.5403	7.76912
1.57123	1.04421	25.5619	10.738
1.76619	1.01566	22.729	12.8775
1.10916	1.58049	21.5806	8.35311
1.40312	0.912338	18.8915	7.60347
1.15361	0.928896	21.6267	7.08235
1.20185	1.30455	48.014	15.8086
1.67026	1.56182	20.3992	8.00621
1.13045	2.23636	20.5753	8.19223
1.43239	1.57452	49.8102	7.0625
1.73705	2.04771	21.3044	9.09133
1.48316	2.59583	26.1272	11.4312
1	0.863636	35.6599	7.16667
1.24641	1.32693	25.9501	8.11332
1.19883	0.842727	19.9534	7.24632
1.12503	0.939394	19.4055	7.54864
1.12281	1.59773	28.0035	9.35523
1.21802	0.969481	18.7581	7.57353
1.08114	1.59806	28.9243	8.4352
1.25853	0.942345	19.254	11.7231
1.16413	0.9689	18.4758	10.5213
2.10127	2.78312	23.5679	7.11765
1.08947	1.09661	25.9409	7.22899
1.06699	1.48208	27.9955	13.8607
1.2589	1.09567	38.6177	8.15896
1.06257	1.06144	66.0487	14.4743
1.53016	0.818182	18.3871	11.3962
1.16065	0.812121	21.8194	7.01471
2.32235	0.846818	25.34	8.25237
3.62635	2.56206	29.0762	10.6779
1.10185	1.35659	22.1882	7.20588
1.04313	0.902273	21.9548	7.75067
1.08577	1.36329	28.2512	7.02451
1.71302	0.853409	27.2561	8.76008
1.15411	2.00479	24.6762	7.87535
1.2345	0.942208	33.3909	16.4568
1.10575	0.838636	19.9462	7.82785
1.3729	0.877273	38.1207	8.90588
0.996101	1.56174	23.2649	18.0291
1.48035	1.0549	20.3581	9.90753
2.39605	1.0175	70.4983	7.57038
1.77495	0.861364	22.9223	6.98039
1.2838	0.886742	23.2403	7.07353
1.06693	1.19069	60.0411	7.01471
1.30312	0.975936	20.4247	7.79808
1.21156	1.16966	19.1774	7.17059
1.59526	1.11043	38.6983	8.24064
1.66093	1.33252	35.881	7.77696
1.37608	1.05647	19.6165	8.79611
1.87865	1.27087	19.6387	7.71858
2.09198	0.970455	19.2294	9.18701
1.42807	0.848485	23.8925	7.42542
1.15929	1.10355	21.5533	7.92437
2.10888	2.20972	29.2252	7.11975
2.33349	1.52508	55.1027	14.9696
1.52339	1.28631	50.4394	11.9893
1.01671	1.16888	27.6827	14.9158
1.69298	0.883523	28.7642	7.28105
2.48573	1.1361	27.0018	9.81871
2.38791	1.18947	20.2782	15.4898
1.17089	1.70518	19.9624	12.8343
1.63361	2.80531	25.1841	7.20221
1.07496	0.979904	18.6774	7.33017
1.55463	1.24407	19.8318	14.0105
1.01462	1.59159	22.3185	8.35958
1.72491	0.841919	34.7448	7.04412
1.7615	1.08587	18.5161	8.28487
0.988304	1.93533	19.6201	7.29118
1.87671	0.86039	35.8917	7.18382
2.2598	1.32576	28.3996	20.0244
1.09844	1.61697	25.0864	7.6501
2.31614	1.24713	27.556	7.78298
1.09759	1.39238	26.8821	8.87649
1.1336	0.944318	18.4452	8.31511
1.31391	1.66103	30.7348	13.1539
1.5612	0.881818	35.7511	8.26716
1.76895	1.23477	23.7097	9.38914
1.29347	1.1404	19.7706	7.08824
1.86374	1.86097	28.2017	12.82
1.50201	0.815909	24.872	7.79257
1.39138	2.51335	36.2273	13.4077
2.39542	1.03125	20.3645	7.43039
1.71317	1.90058	18.4194	7.05882
1.21944	0.998554	25.8665	7.5944
1.15922	1.91378	20.4032	9.23751
2.12484	1.20944	56.7909	7.97778
1.04428	1.38394	22.3527	7.36765
1.30789	1.56422	18.7339	8.9903
1.04873	1.03322	21.1496	11.0749
1.15136	1.68725	22.9983	12.0162
2.12596	2.3495	25.0569	7.4085
2.24309	0.989141	39.908	12.9498
1.54115	1.77634	23.4395	11.8772
1.60132	0.992273	19.7692	13.1651
2.17241	1.06974	24.5968	7.45196
1.43923	1.04697	25.0359	8.78186
1.93782	1.23495	52.4718	7.12868
1.44508	0.818182	40.5513	7.97479
1.17037	1.17811	39.6976	7.73128
2.30533	1.46842	25.465	14.801
1.49576	1.25894	29.009	8.92407
1.43549	1.23368	31.1939	15.2748
1.70214	0.84697	42.694	7.53877
1.52919	1.32238	19.6201	11.5053
2.05678	0.945455	24.9397	14.2719
1.447	0.962587	19.6129	10.5954
1.93242	1.52171	25.3779	19.4608
2.06925	1.18238	31.0509	20.2593
[truncated: 9,565 more rows]
