# Supplementary material for: Structural organization and dynamics of FCHo2 docking on membranes
Source: eLife. 2022 Jan 19;11:e73156. doi: 10.7554/eLife.73156 (PMC8798043; doi:10.7554/eLife.73156)
Supplement: Figure 3—source data 1. [file elife-73156-fig3-data1.xlsx]

## Sheet: Figure 3B
Cell - FCHo2	SLB - FCHo2	SLB - FBAR
0.0671405	0.0671405	0.09436
0.0671405	0.0671405	0.06714
0.0668364	0.0671405	0.06714
0.0671218	0.0671405	0.06714
0.0671218	0.0671405	0.14517
0.0668364	0.0671405	0.06714
0.0671405	0.0671405	0.06714
0.0668364	0.0671405	0.09436
0.0671405	0.0671405	0.06714
0.0671218	0.0943596	0.09436
0.0671218	0.145169	0.10343
0.248601	0.0943596	0.09436
0.243594	0.0671405	0.14517
0.0668364	0.0671405	0.06714
0.0668364	0.0671405	0.06714
0.0671405	0.0671405	0.09436
0.0671405	0.0671405	0.06714
0.0671405	0.0671405	0.06714
0.0668364	0.0671405	0.09436
0.0671405	0.0671405	0.06714
0.0672692	0.0671405	0.06714
0.0671405	0.0671405	0.06714
0.0671218	0.0671405	0.06714
0.0671405	0.0671405	0.09436
0.145169	0.0671405	0.06714
0.0668364	0.0671405	0.17602
0.0668364	0.0671405	0.09436
0.0671405	0.0671405	0.14517
0.0671405	0.0671405	0.09436
0.0668364	0.0671405	0.14517
0.0671405	0.0943596	0.06714
0.0668364	0.0671405	0.06714
0.0671405	0.0671405	0.06714
0.0671405	0.0671405	0.09436
0.0668364	0.0671405	0.06714
0.243594	0.0671405	0.09436
0.0943596	0.0671405	0.06714
0.0671405	0.0671405	0.09436
0.0671405	0.0671405	0.06714
0.0943596	0.0671405	0.06714
0.0671218	0.0671405	0.09436
0.0671405	0.176017	0.06714
0.243594	0.0943596	0.09436
0.0668364	0.0671405	0.06714
0.0668364	0.0671405	0.06714
0.0671405	0.0671405	0.06714
0.0671218	0.0671405	0.09436
0.0671218	0.0671405	0.06714
0.0671405	0.0671405	0.06714
0.0671405	0.0671405	0.09436
0.0671405	0.0671405	0.09436
0.0668364	0.0671405	0.09436
0.0668364	0.0671405	0.06714
0.243594	0.0671405	0.09436
0.144511	0.0671405	0.09436
0.0943333	0.0671405	0.14517
0.0671218	0.0943596	0.06714
0.0671405	0.145169	0.06714
0.0671405	0.0671405	0.09436
0.0668869	0.0671405	0.06714
0.145128	0.0671405	0.06714
0.0671218	0.0671405	0.06714
0.0671405	0.0671405	0.06714
0.0668364	0.0671405	0.14517
0.0671405	0.0671405	0.09436
0.0671405	0.0671405	0.09436
0.0671218	0.0943596	0.14517
0.0671405	0.0671405	0.09436
0.0671218	0.0943596	0.09436
0.0672692	0.0671405	0.06714
0.0668364	0.0671405	0.06714
0.0671405	0.0671405	0.09436
0.137021	0.0671405	0.09436
0.0671405	0.0671405	0.09436
0.0668364	0.0671405	0.09436
0.0668364	0.0671405	0.14517
0.0671405	0.0671405	0.09436
0.0671405	0.0671405	0.06714
0.0671405	0.0671405	0.09436
0.0668364	0.0671405	0.09436
0.0668364	0.0671405	0.09436
0.0672692	0.0671405	0.06714
0.243594	0.0671405	0.06714
0.0671405	0.0671405	0.14517
0.0668364	0.0671405	0.09436
0.0671405	0.0671405	0.14517
0.0671405	0.0943596	0.06714
0.0668364	0.0671405	0.09436
0.0671218	0.0671405	0.09436
0.06687	0.0671405	0.14517
0.0668364	0.0671405	0.14517
0.0671218	0.0671405	0.06714
0.0671405	0.0671405	0.09436
0.0668364	0.0671405	0.06714
0.0672692	0.0671405	0.06714
0.0671405	0.0671405	0.06714
0.0943333	0.0671405	0.09436
0.0668364	0.0671405	0.09436
0.0671405	0.0671405	0.09436
0.0671218	0.176017	0.06714
0.0671405	0.0671405	0.09436
0.0943596	0.0671405	0.06714
0.243594	0.0671405	0.06714
0.0672692	0.0671405	0.17602
0.0668364	0.0671405	0.09436
0.0671405	0.0943596	0.14517
0.0939322	0.0671405	0.09436
0.0671405	0.0671405	0.09436
0.0671218	0.0671405	0.09436
0.0668364	0.145169	0.09436
0.0668364	0.0671405	0.09436
0.243594	0.145169	0.10343
0.0668364	0.0671405	0.09436
0.243594	0.0671405	0.09436
0.0671405	0.0671405	0.09436
0.0668364	0.0671405	0.09436
0.0671218	0.0671405	0.09436
0.0671405	0.0671405	0.14517
0.243594	0.0943596	0.06714
0.0671218	0.0671405	0.20324
0.0671405	0.0671405	0.06714
0.0668364	0.0671405	0.06714
0.0671218	0.0671405	0.06714
0.0671405	0.0671405	0.06714
0.0672692	0.0671405	0.06714
0.0671218	0.0671405	0.09436
0.0671218	0.0943596	0.09436
0.0671405	0.0671405	0.09436
0.0671405	0.0671405	0.09436
0.243594	0.0671405	0.06714
0.243594	0.0671405	0.09436
0.0668364	0.0671405	0.06714
0.0668364	0.283079	0.06714
0.0671405	0.0671405	0.09436
0.144511	0.0671405	0.06714
0.0671405	0.0671405	0.09436
0.137021	0.0671405	0.06714
0.0671405	0.0671405	0.06714
0.0668364	0.0671405	0.06714
0.0671218	0.0671405	0.09436
0.0668364	0.0671405	0.14517
0.0671218	0.0671405	0.06714
0.0671405	0.0671405	0.06714
0.0671405	0.0671405	0.09436
0.0668364	0.0671405	0.06714
0.144511	0.0671405	0.14517
0.0671405	0.0671405	0.09436
0.0668364	0.0671405	0.09436
0.0668364	0.0671405	0.06714
0.0671405	0.0671405	0.09436
0.0671405	0.0671405	0.09436
0.0668364	0.0671405	0.06714
0.0671405	0.0671405	0.06714
0.0671405	0.0671405	0.09436
0.243594	0.103433	0.06714
0.0939322	0.0671405	0.06714
0.0668364	0.0671405	0.06714
0.0668364	0.0671405	0.06714
0.145169	0.0671405	0.09436
0.0939322	0.0943596	0.06714
0.0671218	0.145169	0.09436
0.0671405	0.0671405	0.06714
0.0671218	0.0671405	0.09436
0.0668364	0.0671405	0.06714
0.0671405	0.0671405	0.09436
0.0672692	0.0671405	0.09436
0.0943333	0.0671405	0.06714
0.0939322	0.0671405	0.09436
0.0671405	0.0671405	0.06714
0.0943333	0.0671405	0.20324
0.0939322	0.0671405	0.09436
0.0671218	0.0671405	0.09436
0.0671218	0.0671405	0.06714
0.243594	0.0671405	0.09436
0.0671405	0.0671405	0.09436
0.0668364	0.0671405	0.06714
0.0671218	0.0671405	0.06714
0.0671405	0.0671405	0.06714
0.0671405	0.0671405	0.06714
0.0943596	0.0671405	0.09436
0.176017	0.0671405	0.09436
0.0671405	0.0671405	0.06714
0.0671405	0.0671405	0.14517
0.0668364	0.0671405	0.09436
0.0671405	0.0943596	0.09436
0.0668364	0.0671405	0.06714
0.0671218	0.0671405	0.09436
0.243594	0.0671405	0.06714
0.144511	0.0671405	0.06714
0.0671405	0.0943596	0.09436
0.0671218	0.0671405	0.06714
0.0671218	0.0671405	0.28308
0.0671218	0.0671405	0.09436
0.0671218	0.0671405	0.09436
0.0672692	0.0671405	0.06714
0.243594	0.0943596	0.14517
0.0668364	0.0671405	0.14517
0.145128	0.0671405	0.06714
0.0668364	0.0671405	0.09436
0.0671218	0.0671405	0.06714
0.0668869	0.0943596	0.09436
0.0668364	0.0671405	0.06714
0.0671218	0.0671405	0.09436
0.0671405	0.0671405	0.06714
0.0671218	0.0671405	0.06714
0.0671405	0.0671405	0.09436
0.0671405	0.0671405	0.06714
0.0671405	0.0671405	0.09436
0.0671405	0.0671405	0.06714
0.0668364	0.0671405	0.06714
0.0671218	0.0671405	0.09436
0.0671405	0.0943596	0.06714
0.0671405	0.0671405	0.06714
0.137021	0.0671405	0.09436
0.145128	0.0671405	0.06714
0.0671405	0.0671405	0.06714
0.0668869	0.0671405	0.09436
0.0671405	0.0943596	0.09436
0.0671405	0.0943596	0.06714
0.0668364	0.0671405	0.06714
0.0671405	0.0671405	0.06714
0.0671405	0.0671405	0.09436
0.0671218	0.0671405	0.06714
0.0671405	0.0671405	0.09436
0.144511	0.0671405	0.06714
0.0668364	0.0671405	0.06714
0.0668364	0.0671405	0.06714
0.103404	0.0671405	0.06714
0.0671218	0.0671405	0.09436
0.0671405	0.0671405	0.06714
0.0943596	0.0671405	0.1488
0.0671405	0.0671405	0.09436
0.243594	0.0671405	0.14517
0.0671405	0.0671405	0.06714
0.0671405	0.0671405	0.17602
0.0671405	0.0671405	0.06714
0.0671405	0.0671405	0.06714
0.0671218	0.0671405	0.09436
0.243594	0.0671405	0.09436
0.319731	0.0671405	0.06714
0.0671218	0.0943596	0.17602
0.0668364	0.0671405	0.17602
0.0671218	0.0671405	0.09436
0.243594	0.0671405	0.06714
0.0668364	0.0671405	0.06714
0.0671218	0.0943596	0.09436
0.0668364	0.0671405	0.09436
0.0671405	0.0671405	0.06714
0.0671405	0.0671405	0.09436
0.0671405	0.0671405	0.09436
0.0668364	0.0671405	0.06714
0.0668364	0.0671405	0.14517
0.0671405	0.0671405	0.14517
0.0671218	0.0671405	0.06714
0.144511	0.0671405	0.09436
0.0671405	0.0671405	0.06714
0.0939322	0.0671405	0.09436
0.0668364	0.0671405	0.09436
0.0668364	0.0671405	0.14517
0.0668364	0.0671405	0.09436
0.0671405	0.0671405	0.06714
0.144511	0.0671405	0.09436
0.0943596	0.0671405	0.09436
0.0671405	0.0671405	0.09436
0.0668364	0.0943596	0.09436
0.0671405	0.0671405	0.14517
0.0671405	0.0671405	0.06714
0.0671218	0.0671405	0.06714
0.0671405	0.0671405	0.09436
0.0671405	0.0671405	0.09436
0.0943596	0.0671405	0.09436
0.0668364	0.0671405	0.09436
0.0671218	0.0671405	0.09436
0.0668364	0.0671405	0.20324
0.0943596	0.0671405	0.06714
0.145128	0.0671405	0.09436
0.0671218	0.0671405	0.06714
0.0671405	0.0671405	0.06714
0.0671405	0.0671405	0.06714
0.0671218	0.0671405	0.06714
0.0668364	0.0671405	0.17602
0.243594	0.0671405	0.06714
0.0671218	0.0671405	0.09436
0.137021	0.0671405	0.06714
0.0668364	0.0671405	0.14517
0.0671405	0.145169	0.06714
0.0671405	0.0671405	0.2486
0.0671405	0.0671405	0.06714
0.319731	0.0671405	0.06714
0.0671405	0.0671405	0.06714
0.0668364	0.0671405	0.06714
0.0943596	0.0671405	0.14517
0.0671218	0.0671405	0.06714
0.0668364	0.0671405	0.09436
0.0671405	0.0671405	0.06714
0.0671405	0.0671405	0.14517
0.0668364	0.0671405	0.14517
0.0943333	0.0671405	0.09436
0.0668364	0.0671405	0.06714
0.0671405	0.0943596	0.09436
0.0668364	0.0671405	0.09436
0.145128	0.0671405	0.09436
0.0671405	0.0671405	0.06714
0.145128	0.0671405	0.14517
0.243594	0.0671405	0.14517
0.243594	0.0671405	0.09436
0.0671218	0.0671405	0.06714
0.0943596	0.0671405	0.06714
0.0671405	0.0671405	0.06714
0.0668364	0.0671405	0.06714
0.0671405	0.0671405	0.06714
0.0671218	0.0671405	0.09436
0.0668364	0.0671405	0.06714
0.243594	0.0671405	0.09436
0.0671405	0.0671405	0.09436
0.0668364	0.0671405	0.14517
0.0668364	0.0943596	0.14517
0.0943596	0.0671405	0.09436
0.0668364	0.0671405	0.09436
0.342348	0.0671405	0.09436
0.0671405	0.0671405	0.09436
0.0671218	0.145169	0.06714
0.0671405	0.0671405	0.17602
0.0668364	0.0671405	0.09436
0.0671405	0.0671405	0.06714
0.0671405	0.0671405	0.09436
0.0668364	0.0671405	0.09436
0.0671218	0.0671405	0.06714
0.0671405	0.0671405	0.09436
0.243594	0.0671405	0.06714
0.0671405	0.0671405	0.09436
0.0671405	0.0671405	0.09436
0.0671405	0.0671405	0.09436
0.0671405	0.0671405	0.09436
0.243594	0.0671405	0.06714
0.0671218	0.0943596	0.09436
0.0939322	0.0671405	0.06714
0.243594	0.0943596	0.06714
0.0668364	0.0671405	0.06714
0.0671218	0.0671405	0.06714
0.0671405	0.0671405	0.14517
0.0668364	0.0671405	0.09436
0.0671218	0.0943596	0.06714
0.0671405	0.0671405	0.06714
0.0671405	0.0671405	0.06714
0.0672692	0.0671405	0.06714
0.0671405	0.0943596	0.06714
0.243594	0.0671405	0.06714
0.0943333	0.0671405	0.06714
0.0668364	0.0671405	0.06714
0.0671405	0.0671405	0.09436
0.0668364	0.145169	0.09436
0.145169	0.0671405	0.14517
0.0671218	0.0943596	0.06714
0.0939322	0.0671405	0.09436
0.0671405	0.0671405	0.09436
0.243594	0.0671405	0.14517
0.0668869	0.0671405	0.06714
0.0668364	0.0671405	0.09436
0.0943596	0.0671405	0.09436
0.0671405	0.0671405	0.09436
0.0671405	0.0943596	0.06714
0.0671405	0.0671405	0.09436
0.0672692	0.0671405	0.09436
0.0671405	0.0671405	0.09436
0.0671405	0.0943596	0.06714
0.137021	0.0671405	0.06714
0.0671405	0.0671405	0.09436
0.0668364	0.0671405	0.6333
0.0671405	0.0943596	0.09436
0.144511	0.0671405	0.09436
0.0945405	0.0671405	0.14517
0.145169	0.145169	0.09436
0.0671405	0.0671405	0.06714
0.0671218	0.0671405	0.09436
0.0671405	0.0671405	0.09436
0.0671405	0.0943596	0.09436
0.0671405	0.0671405	0.06714
0.0671405	0.0671405	0.06714
0.0671218	0.0671405	0.06714
0.0668364	0.0671405	0.06714
0.0671405	0.0671405	0.09436
0.0671405	0.0671405	0.06714
0.175968	0.0671405	0.06714
0.0668364	0.0671405	0.09436
0.144511	0.0671405	0.06714
0.243594	0.0671405	0.09436
0.0668364	0.0671405	0.06714
0.0671405	0.0671405	0.09436
0.0668364	0.0671405	0.06714
0.0671405	0.0671405	0.09436
0.0671405	0.0671405	0.09436
0.0671218	0.0671405	0.06714
0.0943596	0.0671405	0.17602
0.0671405	0.0671405	0.06714
0.145169	0.0671405	0.09436
0.0671405	0.0671405	0.06714
0.0671218	0.0671405	0.09436
0.0943333	0.0671405	0.09436
0.0671218	0.0943596	0.09436
0.0671218	0.0671405	0.06714
0.0668364	0.0671405	0.09436
0.0671405	0.0671405	0.06714
0.0939322	0.0671405	0.09436
0.0671218	0.0671405	0.06714
0.0671405	0.0671405	0.53168
0.137021	0.145169	0.06714
0.17522	0.0671405	0.06714
0.0671405	0.0671405	0.09436
0.243594	0.0671405	0.06714
0.0671218	0.0671405	0.06714
0.144511	0.0671405	0.06714
0.0671405	0.0671405	0.14517
0.06687	0.0671405	0.09436
0.0671405	0.0671405	0.14517
0.0943333	0.0671405	0.06714
0.0671405	0.0671405	0.06714
0.0668364	0.0671405	0.06714
0.0671218	0.0671405	0.09436
0.0671405	0.0671405	0.06714
0.0671405	0.0671405	0.09436
0.243594	0.0671405	0.09436
0.0671405	0.0671405	0.14517
0.0671405	0.0671405	0.06714
0.0671405	0.0671405	0.09436
0.145169	0.0671405	0.06714
0.0671405	0.0671405	0.09436
0.0671405	0.0671405	0.06714
0.0668364	0.0671405	0.06714
0.0671405	0.0671405	0.09436
0.0668364	0.0671405	0.20324
0.0671405	0.0943596	0.06714
0.0671405	0.0671405	0.06714
0.243594	0.0671405	0.09436
0.0668364	0.0671405	0.06714
0.0943333	0.0671405	0.09436
0.0668364	0.0671405	0.09436
0.06687	0.0671405	0.09436
0.0671218	0.0671405	0.06714
0.0671405	0.0671405	0.06714
0.0671405	0.0943596	0.14517
0.0671218	0.0671405	0.09436
0.243594	0.0671405	0.09436
0.0668364	0.0671405	0.06714
0.243594	0.0671405	0.06714
0.137021	0.0671405	0.06714
0.0671405	0.0671405	0.14517
0.0939322	0.0943596	0.06714
0.0943596	0.0671405	0.06714
0.175968	0.0671405	0.09436
0.0671405	0.0671405	0.09436
0.0668364	0.0671405	0.14517
0.0671405	0.0671405	0.09436
0.230455	0.0671405	0.06714
0.243594	0.0671405	0.14517
0.0668364	0.0671405	0.06714
0.0939322	0.0671405	0.14517
0.0671218	0.0671405	0.06714
0.0671405	0.0671405	0.37744
0.06687	0.0671405	0.06714
0.0671405	0.0671405	0.09436
0.243594	0.0671405	0.06714
0.0943596	0.0671405	0.09436
0.0668364	0.0671405	0.09436
0.0671405	0.0671405	0.06714
0.0671405	0.0671405	0.06714
0.06687	0.0671405	0.06714
0.0671405	0.145169	0.06714
0.0671218	0.0671405	0.09436
0.0943333	0.0671405	0.14517
0.0668364	0.0671405	0.09436
0.0668364	0.0671405	0.06714
0.0671218	0.0671405	0.06714
0.0671405	0.0671405	0.06714
0.0671405	0.0671405	0.14517
0.0943596	0.0671405	0.06714
0.0671405	0.0671405	0.06714
0.0671405	0.0943596	0.06714
0.0671405	0.0671405	0.06714
0.243594	0.0671405	0.37744
0.0671218	0.0671405	0.20324
0.0668364	0.0671405	0.09436
0.06687	0.0671405	0.09436
0.0668364	0.0671405	0.09436
0.0671405	0.0671405	0.09436
0.0671218	0.0671405	0.06714
0.0668364	0.0671405	0.06714
0.0671405	0.0943596	0.09436
0.243594	0.0671405	0.06714
0.0668869	0.0671405	0.09436
0.0668364	0.0671405	0.06714
0.0671405	0.0671405	0.06714
0.0943596	0.0671405	0.06714
0.0668364	0.0671405	0.06714
0.0939322	0.0671405	0.14517
0.144511	0.0671405	0.06714
0.0943333	0.0671405	0.09436
0.243594	0.0671405	0.06714
0.144511	0.0671405	3.15923
0.0668364	0.0671405	0.14517
0.0668364	0.0671405	0.09436
0.0668364	0.0671405	0.06714
0.0671405	0.0671405	0.06714
0.0671405	0.0943596	0.14517
0.0668364	0.0671405	0.14517
0.0672692	0.0671405	0.10343
0.0671218	0.0671405	0.06714
0.0668364	0.145169	0.09436
0.0671405	0.0671405	0.06714
0.0671405	0.0671405	0.06714
0.0668869	0.176017	0.17602
0.243594	0.0671405	0.06714
0.0668364	0.0671405	0.06714
0.0671218	0.0671405	0.14517
0.0671405	0.0671405	0.09436
0.0671405	0.0671405	0.14517
0.0668364	0.0671405	0.09436
0.0671218	0.0671405	0.09436
0.243594	0.0671405	0.06714
0.0671218	0.0671405	0.09436
0.17522	0.0671405	0.06714
0.0671405	0.0671405	0.09436
0.0671405	0.0671405	0.06714
0.0668364	0.0671405	0.14517
0.0671405	0.0671405	0.14517
0.0672692	0.0671405	0.09436
0.0671218	0.145169	0.09436
0.373705	0.0671405	0.09436
0.0668364	0.0671405	0.06714
0.0671405	0.0671405	0.09436
0.243594	0.0671405	0.06714
0.0671405	0.0671405	0.06714
0.0671405	0.0671405	0.09436
0.0671405	0.0671405	0.09436
0.0668364	0.0671405	0.09436
0.0671405	0.0671405	0.09436
0.0943596	0.0943596	0.06714
0.0671218	0.0671405	0.17602
0.0671405	0.0671405	0.06714
0.243594	0.0671405	0.06714
0.0671218	0.0671405	0.09436
0.0668364	0.0671405	0.09436
0.0668364	0.0671405	0.06714
0.0671405	0.145169	0.06714
0.243594	0.0671405	0.09436
0.0671405	0.0943596	0.09436
0.0668364	0.0671405	0.06714
0.0668364	0.0671405	0.06714
0.0671218	0.0671405	0.17602
0.0671405	0.0671405	0.09436
0.0668364	0.0943596	0.06714
0.243594	0.0671405	0.14517
0.0668364	0.0671405	0.09436
0.0671405	0.0671405	0.06714
0.0943596	0.0671405	0.06714
0.0671218	0.0671405	0.09436
0.0671405	0.0671405	0.09436
0.0668364	0.0671405	0.06714
0.0671218	0.0671405	0.06714
0.0668364	0.0671405	0.06714
0.0943596	0.0671405	0.06714
0.0671218	0.0671405	0.14517
0.243594	0.0671405	0.06714
0.0668364	0.0671405	0.2486
0.0672692	0.0671405	0.06714
0.0671405	0.0671405	0.14517
0.243594	0.0671405	0.06714
0.0668364	0.0671405	0.09436
0.0671405	0.0671405	0.06714
0.0939795	0.0671405	0.06714
0.0671405	0.145169	0.06714
0.0671405	0.0671405	0.06714
0.0671218	0.0943596	0.14517
0.0671405	0.0671405	0.06714
0.0668364	0.0671405	0.09436
0.0668869	0.0671405	0.32119
0.0668364	0.0671405	0.06714
0.0671405	0.0671405	0.17602
0.0671405	0.0671405	0.06714
0.0671218	0.0671405	0.06714
0.0671405	0.0671405	0.06714
0.0668364	0.0671405	0.09436
0.0668364	0.0671405	0.06714
0.137021	0.0671405	0.06714
0.0668364	0.0671405	0.09436
0.0671405	0.0943596	0.2486
0.0672692	0.0671405	0.09436
0.0668364	0.0671405	0.09436
0.0668364	0.0671405	0.09436
0.0671405	0.177832	0.09436
0.0671405	0.0671405	0.06714
0.0671405	0.0671405	0.06714
0.243594	0.0671405	0.06714
0.0671218	0.0671405	0.06714
0.0671405	0.0943596	0.06714
0.364634	0.0671405	0.06714
0.0668364	0.0671405	0.06714
0.0671405	0.0671405	0.09436
0.0668364	0.0671405	0.09436
0.0668364	0.0671405	0.09436
0.243594	0.0671405	0.09436
0.0668869	0.0671405	0.06714
0.0671405	0.0671405	0.09436
0.0671218	0.0671405	0.09436
0.0672692	0.0671405	0.06714
0.0939322	0.0671405	0.06714
0.0668364	0.0671405	0.09436
0.0671218	0.0671405	0.14517
0.0671405	0.0671405	0.14517
0.0943333	0.0671405	0.09436
0.243594	0.0671405	0.09436
0.0668364	0.0671405	0.06714
0.0671405	0.0671405	0.06714
0.0671218	0.0943596	0.06714
0.137021	0.145169	0.09436
0.0671218	0.0671405	0.06714
0.0668364	0.0671405	0.09436
0.0668364	0.0671405	0.14517
0.0668364	0.0671405	0.06714
0.145169	0.0671405	0.06714
0.0939322	0.145169	0.20324
0.103433	0.0671405	0.09436
0.0671405	0.0671405	0.06714
0.0671218	0.0671405	0.09436
0.0939322	0.0671405	0.06714
0.0671218	0.145169	0.17602
0.0672692	0.0671405	0.09436
0.0668364	0.0671405	0.14517
0.0671405	0.0671405	0.14517
0.0671405	0.0671405	0.09436
0.0668364	0.0671405	0.09436
0.0668869	0.0671405	0.06714
0.0668364	0.0671405	0.09436
0.0939795	0.0671405	0.09436
0.0671405	0.0671405	0.09436
0.0943596	0.0671405	0.09436
0.243594	0.0671405	0.09436
0.0668364	0.0671405	0.09436
0.0668364	0.0671405	0.09436
0.0671405	0.0671405	0.14517
0.0671405	0.0671405	0.09436
0.243594	0.0671405	0.09436
0.0943596	0.0671405	0.14517
0.0671218	0.0671405	0.06714
0.0671405	0.0671405	0.06714
0.0671405	0.0943596	0.06714
0.0668364	0.0671405	0.06714
0.0671405	0.0671405	0.06714
0.0668364	0.0671405	0.06714
0.137021	0.0671405	0.06714
0.0671405	0.0943596	0.06714
0.0671405	0.0671405	0.06714
0.0671405	0.0671405	0.06714
0.0671405	0.0671405	0.06714
0.0668869	0.0671405	0.14517
0.0671405	0.0671405	0.09436
0.243594	0.0671405	0.09436
0.0939322	0.176017	0.17602
0.0671218	0.0671405	0.09436
0.0671405	0.0671405	0.06714
0.06687	0.0671405	0.06714
0.0671405	0.0671405	0.06714
0.0671405	0.0671405	0.06714
0.0671405	0.0671405	0.09436
0.0671405	0.0671405	0.09436
0.0671405	0.0671405	0.06714
0.0668364	0.0943596	0.20324
0.137021	0.0671405	0.06714
0.0671405	0.0671405	0.09436
0.0943333	0.0671405	0.09436
0.0671405	0.0671405	0.09436
0.0671405	0.0671405	0.09436
0.0668364	0.0671405	0.09436
0.0668364	0.0671405	0.09436
0.0668364	0.0671405	0.06714
0.0671405	0.0671405	0.06714
0.0668364	0.0671405	0.09436
0.0671405	0.145169	0.14517
0.0671405	0.0671405	0.06714
0.0671405	0.0671405	0.09436
0.0671405	0.0671405	0.09436
0.0668364	0.0671405	0.06714
0.144511	0.0671405	0.06714
0.144511	0.0671405	0.09436
0.0671218	0.0671405	0.09436
0.0671218	0.0671405	0.06714
0.0671218	0.0671405	0.06714
0.0672692	0.0671405	0.06714
0.137021	0.0671405	0.06714
0.0671218	0.0671405	0.09436
0.0939795	0.0943596	0.09436
0.0671405	0.0671405	0.14517
0.175968	0.0671405	0.06714
0.243594	0.0671405	0.09436
0.0668364	0.203236	0.09436
0.202315	0.0671405	0.09436
0.0672692	0.0671405	0.06714
0.0943596	0.0671405	0.09436
0.0671218	0.0671405	0.14517
0.0671405	0.0671405	0.09436
0.202315	0.145169	0.06714
0.247475	0.0671405	0.09436
0.243594	0.0671405	0.06714
0.0943596	0.0671405	0.09436
0.0671405	0.0671405	0.06714
0.0668364	0.0943596	0.09436
0.0671218	0.0943596	0.09436
0.0671405	0.0671405	0.09436
0.0668364	0.0671405	0.09436
0.145169	0.0671405	0.06714
0.0671405	0.0671405	0.06714
0.0668364	0.0671405	0.14517
0.0668364	0.0671405	0.06714
0.0668364	0.0671405	0.06714
0.0671218	0.0671405	0.06714
0.0671405	0.0671405	0.14517
0.243594	0.0671405	0.06714
0.0671405	0.0671405	0.09436
0.0668364	0.0671405	0.06714
0.0671218	0.0671405	0.09436
0.0671218	0.0671405	0.09436
0.0668364	0.0671405	0.09436
0.302955	0.0671405	0.06714
0.0671405	0.0671405	0.53168
0.0671218	0.0671405	0.06714
0.0668364	0.0671405	0.2486
0.0668364	0.0671405	0.09436
0.0671218	0.0671405	0.09436
0.0671405	0.0671405	0.06714
0.0668364	0.0671405	0.06714
0.0668364	0.0671405	0.06714
0.243594	0.0671405	0.09436
0.0671405	0.0671405	0.09436
0.0671218	0.0671405	0.09436
0.0671218	0.0671405	0.06714
0.0671405	0.0671405	0.06714
0.0671218	0.0671405	0.06714
0.0672692	0.0671405	0.06714
0.0671218	0.0671405	0.06714
0.0671405	0.0671405	0.14517
0.0671405	0.0671405	0.09436
0.0668364	0.0671405	0.09436
0.0671218	0.0671405	0.09436
0.0671218	0.0671405	0.09436
0.0671218	0.0671405	0.06714
0.0671405	0.0943596	0.09436
0.144511	0.0671405	0.06714
0.0668364	0.0671405	0.09436
0.0671218	0.0671405	0.09436
0.0671405	0.0671405	0.06714
0.0671405	0.145169	0.06714
0.0671405	0.0671405	0.09436
0.0668364	0.0671405	0.06714
0.0671405	0.0671405	0.06714
0.0668364	0.0671405	0.14517
0.0668364	0.0671405	0.06714
0.0943333	0.0671405	0.09436
0.0671405	0.0671405	0.09436
0.0671405	0.0671405	0.09436
0.0668364	0.0943596	0.09436
0.0668869	0.0671405	0.06714
0.0671405	0.0671405	0.06714
0.0671218	0.0671405	0.09436
0.0668364	0.0671405	0.09436
0.103433	0.0671405	0.06714
0.0668364	0.0671405	0.06714
0.0671218	0.0671405	0.14517
0.0668364	0.0671405	0.06714
0.0671405	0.0671405	0.09436
0.0671405	0.0671405	0.06714
0.0671405	0.0671405	0.09436
0.0671218	0.0671405	0.06714
0.0943596	0.0671405	0.17602
0.0668364	0.0943596	0.06714
0.0671405	0.0671405	0.09436
0.0943333	0.0671405	0.14517
0.243594	0.0671405	0.06714
0.243594	0.0671405	0.09436
0.0671218	0.0943596	0.09436
0.0671405	0.0671405	0.06714
0.0668364	0.0671405	0.06714
0.0668364	0.0671405	0.09436
0.0671218	0.0671405	0.09436
0.0668364	0.0671405	0.06714
0.0943596	0.0671405	0.06714
0.0668364	0.0671405	0.09436
0.0671218	0.0671405	0.06714
0.0668364	0.0671405	0.09436
0.0671218	0.0671405	0.09436
0.145169	0.0671405	0.09436
0.243594	0.0671405	0.06714
0.0671405	0.0671405	0.30667
0.06687	0.0671405	0.06714
0.06687	0.0671405	0.09436
0.0671405	0.0671405	0.17602
0.0671405	0.0671405	0.14517
0.0943333	0.0671405	0.06714
0.145128	0.0671405	0.09436
0.137021	0.0671405	0.06714
0.0668869	0.0671405	0.06714
0.0672692	0.0671405	0.06714
0.0943596	0.0671405	0.06714
0.0939322	0.0671405	0.06714
0.243594	0.0943596	0.09436
0.0671218	0.0671405	0.06714
0.0668364	0.0671405	0.09436
0.06687	0.0671405	0.06714
0.0671405	0.0671405	0.09436
0.0668364	0.0671405	0.14517
0.243594	0.145169	0.06714
0.0671218	0.0671405	0.06714
0.0668364	0.0943596	0.06714
0.243594	0.0671405	0.14517
0.0671218	0.0671405	0.14517
0.0671405	0.0671405	0.06714
0.0671405	0.0671405	0.06714
0.0671218	0.145169	0.06714
0.145169	0.0671405	0.09436
0.0668869	0.0671405	0.06714
0.06687	0.0671405	0.09436
0.0671218	0.0671405	0.06714
0.0671405	0.0671405	0.09436
0.0671405	0.0671405	0.09436
0.0943333	0.0671405	0.17602
0.144511	0.0671405	0.14517
0.0671405	0.0671405	0.06714
0.0671405	0.0671405	0.06714
0.0668364	0.0943596	0.09436
0.0671218	0.0671405	0.06714
0.0668364	0.0671405	0.06714
1.23196	0.0671405	0.06714
0.0943333	0.0671405	0.09436
0.0671405	0.0671405	0.09436
0.0671405	0.0671405	0.06714
0.0671405	0.0671405	0.06714
0.0943333	0.0671405	0.06714
0.0671218	0.0671405	0.09436
0.0671405	0.248601	0.06714
0.0671405	0.0671405	0.09436
0.0671218	0.0671405	0.09436
0.0671405	0.0671405	0.17602
0.0671405	0.0671405	0.06714
0.137021	0.0671405	0.06714
0.0671218	0.145169	0.09436
0.176017	0.0671405	0.09436
0.137021	0.0671405	0.06714
0.243594	0.0671405	0.06714
0.0943596	0.0671405	0.09436
0.145128	0.0671405	0.06714
0.0671405	0.0671405	0.09436
0.0671218	0.0671405	0.09436
0.0671405	0.145169	0.06714
0.243594	0.0671405	0.06714
0.0668364	0.0671405	0.09436
0.0671405	0.0671405	0.09436
0.243594	0.0671405	0.09436
0.0671405	0.0671405	0.06714
0.0671405	0.0671405	0.06714
0.0668364	0.0671405	0.06714
0.0671405	0.0671405	0.14517
0.0671218	0.0671405	0.2486
0.0668364	0.0671405	0.06714
0.144511	0.0671405	0.09436
0.0671405	0.0671405	0.09436
0.0671405	0.176017	0.06714
0.0668364	0.0671405	0.06714
0.06687	0.0671405	0.06714
0.0943596	0.0671405	0.09436
0.0671218	0.0671405	0.06714
0.0668364	0.0671405	0.14517
0.0671405	0.0671405	0.09436
0.06687	0.0671405	0.09436
0.0668364	0.0671405	0.09436
0.0671218	0.145169	0.06714
0.0672692	0.0671405	0.06714
0.243594	0.0671405	0.06714
0.144511	0.248601	0.09436
0.0671405	0.0943596	0.09436
0.0943596	0.0671405	0.09436
0.0671405	0.0671405	0.06714
0.137021	0.0671405	0.06714
0.0671405	0.0671405	0.06714
0.103433	0.0671405	0.06714
0.0671405	0.0671405	0.09436
0.0671405	0.0943596	0.06714
0.0671405	0.0671405	0.14517
0.0668364	0.0671405	0.09436
0.0668364	0.0671405	0.06714
0.0668364	0.0671405	0.06714
0.257602	0.0671405	0.09436
0.0668364	0.0671405	0.09436
0.0671405	0.0671405	0.06714
0.0671405	0.0671405	0.14517
0.0671405	0.0671405	0.06714
0.375729	0.0671405	0.09436
0.0668364	0.0671405	0.09436
0.243594	0.0671405	0.14517
0.0671405	0.0671405	0.06714
0.0668364	0.0671405	0.09436
0.0671405	0.0671405	0.09436
0.0668364	0.0943596	0.06714
0.0671405	0.0671405	0.14517
0.243594	0.0671405	0.06714
0.0671218	0.0671405	0.06714
0.0671405	0.0671405	0.06714
0.0668364	0.0671405	0.06714
0.0671218	0.0671405	0.06714
0.0671218	0.0671405	0.09436
0.0671218	0.0671405	0.06714
0.0671405	0.0671405	0.09436
0.243594	0.0671405	0.06714
0.0671218	0.0671405	0.06714
0.0671405	0.0671405	0.09436
0.0668364	0.0671405	0.06714
0.0668364	0.0671405	0.06714
0.0671218	0.0671405	0.20324
0.0668364	0.0943596	0.14517
0.0671218	0.0671405	0.06714
0.0671405	0.0671405	0.06714
0.0671218	0.0671405	0.06714
0.0671405	0.0671405	0.06714
0.0671405	0.0671405	0.09436
0.0943596	0.0671405	0.09436
0.202315	0.0671405	0.06714
0.0671405	0.0943596	0.06714
0.0671218	0.0671405	0.06714
0.0668364	0.0671405	0.14517
0.0668364	0.0671405	0.14517
0.0668364	0.0671405	0.09436
0.0671405	0.0671405	0.06714
0.0943596	0.0671405	0.06714
0.243594	0.0671405	0.06714
0.0671405	0.0671405	0.2486
0.0671218	0.0671405	0.06714
0.264859	0.0671405	0.06714
0.0668869	0.0671405	0.06714
0.0668364	0.0671405	0.09436
0.0671405	0.0671405	0.06714
0.0671405	0.0671405	0.06714
0.0671218	0.0671405	0.06714
0.0943596	0.0671405	0.09436
0.225011	0.0671405	0.09436
0.0671405	0.0671405	0.09436
0.0671405	0.0671405	0.06714
0.243594	0.0671405	0.09436
0.137021	0.0671405	0.17602
0.0943333	0.0671405	0.09436
0.0939322	0.0671405	0.06714
0.0671218	0.0671405	0.06714
0.0939322	0.0671405	0.06714
0.0671405	0.0671405	0.14517
0.0671218	0.0671405	0.06714
0.0671405	0.0671405	0.09436
0.06687	0.0671405	0.09436
0.243594	0.0671405	0.09436
0.0668364	0.0671405	0.06714
0.0671218	0.0671405	0.09436
0.0671405	0.0671405	0.06714
0.0671218	0.0671405	0.09436
0.0671405	0.0671405	0.14517
0.145128	0.0671405	0.06714
0.0671405	0.0671405	0.09436
0.0671405	0.145169	0.06714
0.0671218	0.0671405	0.06714
0.0671218	0.0671405	0.06714
0.0672692	0.0943596	0.09436
0.0668364	0.0671405	0.06714
0.0668364	0.0943596	0.06714
0.0671405	0.0671405	0.09436
0.0671405	0.0671405	0.06714
0.06687	0.0671405	0.09436
0.0668364	0.0671405	0.09436
0.0671218	0.0671405	0.06714
0.0668364	0.0671405	0.14517
0.17522	0.0671405	0.09436
0.0668364	0.0671405	0.14517
0.137021	0.0671405	0.14517
0.0671405	0.0671405	0.17602
0.0671218	0.0671405	0.10343
0.0671218	0.0671405	0.09436
0.0668364	0.0671405	0.06714
0.0671405	0.0671405	0.09436
0.0671405	0.0671405	0.06714
0.0671405	0.223197	0.09436
0.0668364	0.0671405	0.09436
0.243594	0.0671405	0.06714
0.0943333	0.0671405	0.06714
0.0671218	0.0671405	0.09436
0.0672692	0.0671405	0.06714
0.06687	0.0671405	0.06714
0.0671405	0.0943596	0.09436
0.0671218	0.0671405	0.09436
0.0671405	0.0671405	0.09436
0.18509	0.0671405	0.06714
0.0671218	0.0671405	0.09436
0.0668364	0.0671405	0.06714
0.243594	0.0671405	0.09436
0.0671405	0.0671405	0.09436
0.0671405	0.0671405	0.14517
0.0671405	0.0671405	0.09436
0.0668364	0.0671405	0.06714
0.0671405	0.0943596	0.14517
0.0671218	0.0671405	0.06714
0.0671405	0.0943596	0.06714
0.0943596	0.0671405	0.06714
0.0668364	0.0671405	0.06714
0.243594	0.0671405	0.09436
0.0671405	0.0671405	0.06714
0.0671218	0.0671405	0.09436
0.0943596	0.0943596	0.14517
0.0668364	0.0671405	0.14517
0.0939322	0.0671405	0.06714
0.0671405	0.0671405	0.09436
0.144511	0.0671405	0.06714
0.0668364	0.0671405	0.06714
0.0671405	0.0671405	0.14517
0.11019	0.0671405	0.06714
0.0668364	0.0943596	0.09436
0.0671405	0.0671405	0.06714
0.0671218	0.0671405	0.25223
0.0668364	0.0671405	0.06714
0.0671405	0.0943596	0.19235
0.0671405	0.0671405	0.06714
0.0671405	0.0671405	0.06714
0.0671218	0.0671405	0.06714
0.0671218	0.0671405	0.09436
0.0671218	0.0671405	0.06714
0.0671405	0.145169	0.06714
0.0671218	0.0671405	0.14517
0.0671218	0.145169	0.09436
0.0671405	0.0943596	0.06714
0.0668364	0.0943596	0.06714
0.0939322	0.0671405	0.14517
0.0671405	0.145169	0.2486
0.0668364	0.0671405	0.09436
0.0668364	0.0671405	0.06714
0.0668364	0.0671405	0.09436
0.0671405	0.0671405	0.09436
0.0671405	0.0671405	0.14517
0.0671405	0.0671405	0.09436
0.0671405	0.0671405	0.14517
0.144511	0.0671405	0.06714
0.0671405	0.0671405	0.09436
0.0671218	0.0671405	0.14517
0.0943333	0.0943596	0.09436
0.0668364	0.0671405	0.09436
0.0671405	0.0671405	0.06714
0.0672692	0.0671405	0.06714
0.0668364	0.0671405	0.09436
0.0671405	0.0943596	0.06714
0.0671405	0.0671405	0.17602
0.0671405	0.0671405	0.06714
0.0671405	0.0671405	0.09436
0.0671405	0.0671405	0.06714
0.0671405	0.176017	0.09436
0.137021	0.0671405	0.14517
0.0939322	0.0671405	0.06714
0.0943333	0.0943596	0.14517
0.0671218	0.0671405	0.06714
0.0668364	0.0671405	0.09436
0.0671405	0.0671405	0.06714
0.0671405	0.0671405	0.09436
0.243594	0.0671405	0.06714
0.0671405	0.0671405	0.09436
0.243594	0.0671405	0.09436
0.0668364	0.0671405	0.06714
0.0671218	0.0671405	0.06714
0.0939322	0.0671405	0.06714
0.0671405	0.0671405	0.17602
0.0671405	0.145169	0.06714
0.0943333	0.0671405	0.09436
0.0671405	0.0671405	0.09436
0.0671405	0.0671405	0.06714
0.0668364	0.0671405	0.09436
0.0668364	0.0671405	0.09436
0.0671405	0.0671405	0.14517
0.0668364	0.0671405	0.06714
0.0671218	0.0671405	0.10343
0.0671405	0.0671405	0.14517
0.0671218	0.0671405	0.06714
0.0668364	0.0671405	0.09436
0.0671405	0.0671405	0.06714
0.243594	0.176017	0.09436
0.0671405	0.0671405	0.14517
0.0668364	0.0671405	0.09436
0.0671405	0.0671405	0.09436
0.0671218	0.0671405	0.06714
0.0671405	0.0671405	0.06714
0.0671218	0.0671405	0.09436
0.0668364	0.0671405	0.09436
0.0668364	0.0671405	0.06714
0.0671405	0.0671405	0.06714
0.0671218	0.0671405	0.06714
0.0672692	0.145169	0.17602
0.0668364	0.0671405	0.06714
0.0668364	0.0943596	0.06714
0.0668364	0.0671405	0.09436
0.0671405	0.0671405	0.06714
0.0943596	0.0671405	0.09436
0.0671405	0.0943596	0.09436
0.243594	0.0671405	0.06714
0.0671405	0.0671405	0.06714
0.0671405	0.0671405	0.09436
0.0671405	0.0671405	0.06714
0.0671218	0.0943596	0.06714
0.0668364	0.27582	0.06714
0.0671405	0.283079	0.06714
0.0671218	0.0671405	0.06714
0.0939322	0.145169	0.06714
0.0668364	0.0671405	0.09436
0.102964	0.176017	0.09436
0.243594	0.0671405	0.09436
0.0668364	0.0671405	0.06714
0.0668364	0.0671405	0.06714
0.0668364	0.0671405	0.06714
0.0671405	0.0671405	0.17602
0.0668364	0.0671405	0.09436
0.0668364	0.0671405	0.06714
0.0943596	0.0671405	0.09436
0.243594	0.0671405	0.20324
0.0671218	0.0671405	0.32119
0.0671405	0.0671405	0.09436
0.0668364	0.0671405	0.09436
0.0668364	0.0671405	0.09436
0.0671218	0.0671405	0.09436
0.0668364	0.0671405	0.06714
0.0668364	0.0671405	0.28308
0.137021	0.0671405	0.09436
0.144511	0.0671405	0.09436
0.0671405	0.0943596	0.09436
0.0671405	0.0671405	0.06714
0.0671405	0.0671405	0.14517
0.0671405	0.0671405	0.06714
0.0671405	0.0943596	0.09436
0.0668364	0.0671405	0.06714
0.175968	0.0943596	0.09436
0.0943596	0.0671405	0.14517
0.144511	0.0671405	0.09436
0.0668364	0.0671405	0.17602
0.0672692	0.0671405	0.09436
0.0671405	0.0671405	0.06714
0.0668364	0.0671405	0.06714
0.0671405	0.0671405	0.14517
0.0671218	0.0671405	0.09436
0.0671218	0.0943596	0.06714
0.0671405	0.0943596	0.06714
0.0671218	0.0671405	0.06714
0.0943596	0.0671405	0.09436
0.0671405	0.0943596	0.06714
0.0668364	0.0671405	0.06714
0.0671405	0.0671405	0.06714
0.0671218	0.0671405	0.14517
0.0671405	0.0671405	0.06714
0.0671405	0.0671405	0.09436
0.243594	0.0671405	0.6333
0.243594	0.0671405	0.06714
0.0671218	0.0671405	0.14517
0.0671218	0.0671405	0.09436
0.0671218	0.0671405	0.06714
0.0671405	0.145169	0.09436
0.0668364	0.0671405	0.09436
0.243594	0.0943596	0.09436
0.0671218	0.0671405	0.06714
0.243594	0.0943596	0.14517
0.0668364	0.0671405	0.06714
0.243594	0.0671405	0.06714
0.0671405	0.145169	0.09436
0.0943596	0.0671405	0.17602
0.0671405	0.0671405	0.09436
0.06687	0.0671405	0.06714
0.0671405	0.0671405	0.06714
0.0668364	0.0671405	0.06714
0.192571	0.0671405	0.09436
0.0671218	0.0671405	0.06714
0.0671218	0.0671405	0.06714
0.0671405	0.0671405	0.06714
0.0668364	0.0671405	0.09436
0.145169	0.0671405	0.09436
0.0671405	0.0671405	0.09436
0.0671405	0.0671405	0.09436
0.243594	0.0671405	0.17602
0.0671405	0.0671405	0.06714
0.0668364	0.0671405	0.09436
0.0671405	0.0671405	0.06714
0.0668364	0.0943596	0.28308
0.0672692	0.0943596	0.06714
0.0668364	0.0671405	0.09436
0.0668364	0.0671405	0.09436
0.243594	0.0671405	0.06714
0.0671405	0.0671405	0.06714
0.0671405	0.176017	0.09436
0.0668364	0.0671405	0.06714
0.0943596	0.0671405	0.06714
0.0671405	0.0671405	0.09436
0.0668364	0.0671405	0.06714
0.0671405	0.0671405	0.06714
0.06687	0.0671405	0.06714
0.0668364	0.0671405	0.09436
0.0668364	0.0671405	0.09436
0.0672692	0.0671405	0.06714
0.0671218	0.0671405	0.06714
0.0671405	0.0671405	0.09436
0.0668364	0.0671405	0.09436
0.0668364	0.0671405	0.09436
0.0671218	0.0671405	0.32119
0.0671405	0.0671405	0.06714
0.0671218	0.0671405	0.2486
0.0671405	0.0671405	0.09436
0.0943596	0.0671405	0.14517
0.0671405	0.0671405	0.06714
0.243594	0.0671405	0.06714
0.0671218	0.0943596	0.14517
0.0671405	0.0671405	0.14517
0.144511	0.0671405	0.09436
0.0671218	0.0671405	0.06714
0.0672692	0.0671405	0.06714
0.0671405	0.0671405	0.09436
0.0671405	0.0671405	0.09436
0.0671218	0.0671405	0.09436
0.0671405	0.0671405	0.06714
0.0668364	0.0671405	0.06714
0.0671218	0.0671405	0.09436
0.0671405	0.0671405	0.09436
0.0671405	0.0671405	0.14517
0.144511	0.0671405	0.06714
0.0943596	0.0671405	0.06714
0.0671405	0.0671405	0.06714
0.243594	0.0671405	0.09436
0.0671405	0.0671405	0.09436
0.0671405	0.0943596	0.06714
0.0671218	0.0671405	0.09436
0.0671218	0.0671405	0.09436
0.0671218	0.0671405	0.06714
0.0671405	0.0671405	0.06714
0.0671405	0.0671405	0.09436
0.247475	0.0943596	0.09436
0.0668364	0.0671405	0.09436
0.0668364	0.0671405	0.06714
0.0671405	0.0671405	0.06714
0.243594	0.0671405	0.09436
0.0671405	0.0671405	0.06714
0.0668364	0.0671405	0.06714
0.0671405	0.0671405	0.14517
0.0668364	0.0671405	0.09436
0.0671405	0.0671405	0.06714
0.0671218	0.0671405	0.06714
0.0668364	0.0671405	0.14517
0.0671405	0.0671405	0.06714
0.243594	0.0671405	0.06714
0.0671405	0.0671405	0.09436
0.0668364	0.0671405	0.06714
0.144584	0.0671405	0.06714
0.0939322	0.0671405	0.06714
0.0668364	0.0671405	0.06714
0.144511	0.0671405	0.06714
0.0671405	0.0671405	0.09436
0.0671405	0.0671405	0.06714
0.0671405	0.0671405	0.09436
0.0671405	0.0671405	0.06714
0.144511	0.0671405	0.09436
0.0668364	0.0943596	0.06714
0.0668364	0.0671405	0.06714
0.0671218	0.0671405	0.09436
0.0671405	0.0671405	0.09436
0.0671218	0.0671405	0.06714
0.0668869	0.0671405	0.06714
0.202315	0.0671405	0.06714
0.0671405	0.0671405	0.17602
0.0943333	0.0671405	0.06714
0.243594	0.0671405	0.06714
0.0671405	0.0671405	0.06714
0.0671405	0.0671405	0.09436
0.0671405	0.0671405	0.09436
0.06687	0.0671405	0.09436
0.0671405	0.0671405	0.17602
0.0671405	0.0671405	0.06714
0.0671405	0.0671405	0.09436
0.0671218	0.0943596	0.09436
0.144511	0.0943596	0.09436
0.0939795	0.0671405	0.06714
0.0671218	0.0671405	0.09436
0.0671218	0.0671405	0.09436
0.0671405	0.0671405	0.32119
0.0943596	0.0671405	0.06714
0.0671218	0.0671405	0.06714
0.0671405	0.0671405	0.06714
0.0671405	0.0671405	0.14517
0.175968	0.0671405	0.06714
0.0668364	0.0671405	0.06714
0.0671405	0.0671405	0.06714
0.0671218	0.0671405	0.09436
0.0668364	0.0671405	0.06714
0.0668364	0.0671405	0.06714
0.0671405	0.0671405	0.06714
0.0671218	0.0671405	0.09436
0.0668364	0.0671405	0.06714
0.0671405	0.0943596	0.09436
0.175968	0.0671405	0.06714
0.243594	0.0671405	0.17602
0.0939322	0.0671405	0.06714
0.0671218	0.0671405	0.09436
0.0668869	0.0671405	0.06714
0.0671405	0.0671405	0.06714
0.0668364	0.0671405	0.09436
0.0671405	0.0671405	0.09436
0.243594	0.0671405	0.09436
0.0668364	0.145169	0.3484
0.0668364	0.0671405	0.09436
0.0671218	0.0671405	0.06714
0.0668364	0.0671405	0.14517
0.0668364	0.0671405	0.06714
0.0671405	0.0671405	0.09436
0.0671405	0.0671405	0.06714
0.0671218	0.0671405	0.06714
0.0671405	0.0671405	0.06714
0.0671405	0.0671405	0.06714
0.0671218	0.0671405	0.14517
0.243594	0.0671405	0.09436
0.176354	0.0943596	0.2486
0.0671405	0.0671405	0.06714
0.0671218	0.0671405	0.09436
0.0939322	0.0671405	0.06714
0.0671405	0.0671405	0.06714
0.243594	0.0671405	0.09436
0.0939322	0.0671405	0.06714
0.243594	0.0943596	0.06714
0.0671405	0.0671405	0.09436
0.145169	0.0671405	0.06714
0.0671405	0.0671405	0.06714
0.0668364	0.0671405	0.09436
0.0671218	0.0671405	0.06714
0.0671218	0.0671405	0.09436
0.243594	0.0671405	0.06714
0.0671218	0.0671405	0.06714
0.0943333	0.0671405	0.09436
0.0939322	0.0671405	0.06714
0.0671405	0.0671405	0.06714
0.0668364	0.0671405	0.09436
0.0671405	0.0671405	0.09436
0.0671218	0.0943596	0.06714
0.06687	0.0671405	0.06714
0.0668364	0.0671405	0.09436
0.0668364	0.0671405	0.06714
0.0671218	0.0671405	0.06714
0.0668364	0.0671405	0.10343
0.144511	0.0671405	0.09436
0.0671405	0.0671405	0.14517
0.0668364	0.0671405	0.06714
0.0671405	0.0671405	0.14517
0.0671218	0.0943596	0.06714
0.243594	0.0671405	0.06714
0.0671405	0.321186	0.06714
0.0671405	0.0671405	0.09436
0.0671405	0.0671405	0.09436
0.137021	0.0943596	0.09436
0.0671405	0.0671405	0.20324
0.0668364	0.0671405	0.09436
0.0671405	0.0671405	0.14517
0.0943596	0.0671405	0.06714
0.145169	0.0671405	0.06714
0.0668364	0.0671405	0.06714
0.243594	0.0671405	0.09436
0.0671405	0.0671405	0.14517
0.243594	0.0671405	0.09436
0.0943596	0.0671405	0.09436
0.0671218	0.0671405	0.06714
0.0671405	0.0671405	0.09436
0.0671405	0.0671405	0.06714
0.0671405	0.0671405	0.14517
0.0671218	0.0671405	0.06714
0.0668364	0.0671405	0.09436
0.0671405	0.0671405	0.06714
0.0943596	0.0671405	0.09436
0.0671405	0.0671405	0.06714
0.0671405	0.0671405	0.09436
0.0671218	0.0671405	0.06714
0.0939322	0.0671405	0.09436
0.0671405	0.0671405	0.09436
0.144511	0.0671405	0.06714
0.0671405	0.0671405	0.06714
0.0671405	0.0671405	0.06714
0.0668364	0.0671405	0.06714
0.0668364	0.0671405	0.06714
0.0668364	0.0671405	0.06714
0.0671218	0.0671405	0.06714
0.0671218	0.0671405	0.06714
0.0671218	0.0671405	0.20324
0.144511	0.0671405	0.09436
0.243594	0.0671405	0.06714
0.243594	0.0671405	0.14517
0.0671405	0.0671405	0.17602
0.137021	0.145169	0.06714
0.0671218	0.0671405	0.06714
0.0671218	0.0671405	0.06714
0.0671405	0.0671405	0.09436
0.0668364	0.0671405	0.09436
0.0668364	0.0671405	0.06714
0.0671218	0.0671405	0.06714
0.0671405	0.0671405	0.06714
0.243594	0.0671405	0.14517
0.0671405	0.0671405	0.09436
0.0939322	0.0671405	0.17602
0.243594	0.0671405	0.32119
0.145169	0.0671405	0.09436
0.0671405	0.0671405	0.09436
0.0668364	0.0671405	0.09436
0.0671405	0.0671405	0.06714
0.0671405	0.0943596	0.06714
0.0671218	0.0671405	0.14517
0.0668364	0.0671405	0.09436
0.0671218	0.0671405	0.06714
0.0668364	0.0671405	0.09436
0.0671405	0.0671405	0.14517
0.0671405	0.0671405	0.06714
0.0671405	0.0671405	0.06714
0.0671218	0.0671405	0.06714
0.0671405	0.0671405	0.09436
0.0671405	0.0671405	0.09436
0.145128	0.0671405	0.06714
0.243594	0.0671405	0.09436
0.0668364	0.0671405	0.06714
0.0671405	0.0671405	0.09436
0.0671405	0.0671405	0.06714
0.0671405	0.0671405	0.09436
0.145169	0.0671405	0.09436
0.0671218	0.0671405	0.06714
0.0668364	0.0671405	0.09436
0.0671405	0.0671405	0.09436
0.0943596	0.0671405	0.06714
0.0671405	0.0671405	0.09436
0.0671405	0.0671405	0.09436
0.0671405	0.0671405	0.06714
0.0671405	0.0671405	0.14517
0.137021	0.0671405	0.09436
0.243594	0.0671405	0.09436
0.0671405	0.0671405	0.09436
0.0671405	0.145169	0.09436
0.0671218	0.0671405	0.06714
0.17522	0.0943596	0.06714
0.0671405	0.0943596	0.14517
0.0668364	0.0671405	0.09436
0.0671405	0.0671405	0.06714
0.0668364	0.0671405	0.09436
0.0671405	0.0671405	0.06714
0.0668364	0.0671405	0.06714
0.0671405	0.0671405	0.06714
0.0939322	0.0671405	0.06714
0.145128	0.0671405	0.09436
0.0671218	0.0671405	0.09436
0.0671405	0.0671405	0.06714
0.0671405	0.0671405	0.06714
0.0671405	0.0943596	0.14517
0.243594	0.0671405	0.09436
0.144511	0.0671405	0.09436
0.0668364	0.0671405	0.06714
0.243594	0.0671405	0.17602
0.145128	0.0671405	0.14517
0.144511	0.0671405	0.06714
0.0671405	0.0671405	0.06714
0.0671218	0.0671405	0.09436
0.0671405	0.0671405	0.06714
0.0671405	0.176017	0.09436
0.0668364	0.0671405	0.06714
0.0668364	0.0671405	0.09436
0.144511	0.0671405	0.06714
0.243594	0.0671405	0.06714
0.0668364	0.0671405	0.09436
0.0671405	0.0671405	0.14517
0.243594	0.0671405	0.06714
0.06687	0.0671405	0.14517
0.0671405	0.0671405	0.09436
0.0671405	0.0671405	0.06714
0.0668364	0.0671405	0.09436
0.0668364	0.0671405	0.06714
0.0671405	0.0671405	0.06714
0.0943333	0.0671405	0.09436
0.0671405	0.0671405	0.06714
0.103404	0.0671405	0.09436
0.0671405	0.0671405	0.09436
0.0939322	0.0671405	0.09436
0.0939322	0.0671405	0.09436
0.0671218	0.0671405	0.06714
0.0671405	0.0671405	0.06714
0.0671405	0.0671405	0.14517
0.17522	0.0671405	0.06714
0.0671405	0.0671405	0.06714
0.0668869	0.0671405	0.09436
0.0671405	0.0671405	0.09436
0.0671405	0.0671405	0.09436
0.0671218	0.0671405	0.09436
0.0671218	0.0671405	0.06714
0.0668364	0.0671405	0.06714
0.0668364	0.0671405	0.06714
0.0671405	0.0671405	0.06714
0.0668364	0.0671405	0.06714
0.0668364	0.0671405	0.06714
0.0943596	0.0671405	0.09436
0.248601	0.0671405	0.09436
0.0671405	0.145169	0.06714
0.0671218	0.145169	0.09436
0.0668364	0.0671405	0.09436
0.0943333	0.0671405	0.06714
0.0671405	0.0671405	0.06714
0.0671218	0.0671405	0.06714
0.0945405	0.0671405	0.09436
0.06687	0.0671405	0.09436
0.137021	0.0671405	0.09436
0.0671405	0.0671405	0.09436
0.0671218	0.0671405	0.09436
0.202315	0.0671405	0.06714
0.243594	0.0671405	0.06714
0.0671405	0.0671405	0.06714
0.0672692	0.0671405	0.09436
0.0668364	0.0671405	0.09436
0.0668364	0.0671405	0.17602
0.0943333	0.0671405	0.14517
0.0668364	0.0671405	0.06714
0.0671405	0.145169	0.06714
0.0671218	0.0671405	0.09436
0.0668364	0.0671405	0.06714
0.137021	0.0671405	0.06714
0.0943596	0.0671405	0.06714
0.0671405	0.0671405	0.06714
0.0668364	0.0671405	0.06714
0.0943333	0.0671405	0.06714
0.0671405	0.0671405	0.09436
0.0668364	0.0671405	0.06714
0.0671405	0.0671405	0.09436
0.0671405	0.0943596	0.06714
0.0671405	0.0671405	0.14517
0.0671405	0.0671405	0.06714
0.145128	0.0671405	0.06714
0.0671218	0.0671405	0.06714
0.0671218	0.0671405	0.09436
0.0668364	0.0671405	0.06714
0.06687	0.0671405	0.09436
0.0671218	0.203236	0.06714
0.0668364	0.0671405	0.09436
0.0668364	0.0671405	0.14517
0.0671405	0.0671405	0.09436
0.0668364	0.0671405	0.06714
0.0671218	0.0671405	0.09436
0.243594	0.0671405	0.09436
0.0668364	0.0671405	0.06714
0.0668364	0.0671405	0.06714
0.0671218	0.0671405	0.06714
0.0668364	0.0671405	0.09436
0.0671405	0.0671405	0.06714
0.0668364	0.0671405	0.14517
0.0671218	0.0671405	0.09436
0.145128	0.0943596	0.14517
0.0943596	0.0943596	0.06714
0.0671218	0.0671405	0.09436
0.0671405	0.0671405	0.17602
0.0668364	0.0671405	0.06714
0.243594	0.0671405	0.06714
0.145128	0.0671405	0.09436
0.137021	0.0671405	0.09436
0.0671218	0.0671405	0.14517
0.0668364	0.0671405	0.06714
0.145169	0.0671405	0.09436
0.0671405	0.0671405	0.06714
0.0671218	0.0671405	0.09436
0.0671218	0.0671405	0.06714
0.0671405	0.0671405	0.06714
0.0668364	0.321186	0.06714
0.0671405	0.0671405	0.06714
0.0671405	0.0671405	0.09436
0.0671405	0.0671405	0.06714
0.0668364	0.0671405	0.09436
0.137021	0.0671405	0.06714
0.0939322	0.0671405	0.09436
0.0671405	0.0671405	0.09436
0.0671405	0.0671405	0.06714
0.0668364	0.0671405	0.06714
0.0671218	0.0671405	0.06714
0.0671405	0.0671405	0.09436
0.0668364	0.0671405	0.09436
0.0668869	0.0671405	0.06714
0.0668364	0.0943596	0.09436
0.0668364	0.0671405	0.14517
0.0671405	0.145169	0.2486
0.0668364	0.0671405	0.14517
0.243594	0.0671405	0.09436
0.0671405	0.0943596	0.09436
0.0668364	0.0671405	0.09436
0.0668364	0.0671405	0.09436
0.0671218	0.0671405	0.09436
0.0671218	0.0671405	0.11069
0.0671405	0.0671405	0.09436
0.0943596	0.0671405	0.09436
0.0939322	0.0671405	0.06714
0.0671405	0.0671405	0.06714
0.0943596	0.0671405	0.09436
0.0668364	0.0671405	0.06714
0.0671218	0.0671405	0.06714
0.0671405	0.0671405	0.09436
0.0668364	0.0671405	0.14517
0.0671218	0.0671405	0.06714
0.0671405	0.0671405	0.09436
0.0671218	0.0671405	0.09436
0.0668364	0.0671405	0.09436
0.0671405	0.0671405	0.09436
0.0668364	0.0671405	0.06714
0.0671405	0.0943596	0.06714
0.0671218	0.0943596	0.14517
0.0668364	0.0671405	0.06714
0.0668364	0.0671405	0.06714
0.0671405	0.0671405	0.09436
0.0671218	0.0671405	0.09436
0.0671405	0.0671405	0.06714
0.247475	0.0671405	0.09436
0.0671218	0.0671405	0.09436
0.0671405	0.0671405	0.14517
0.0671218	0.0671405	0.06714
0.0671405	0.0671405	0.06714
0.0671218	0.0943596	0.81294
0.0668364	0.0671405	0.06714
0.0671405	0.0671405	0.06714
0.0668364	0.0671405	0.09436
0.0668364	0.0671405	0.14517
0.0671405	0.0671405	0.09436
0.0671405	0.0671405	0.09436
0.0671405	0.0671405	0.06714
0.0671405	0.0671405	0.09436
0.0671218	0.0671405	0.09436
0.06687	0.0671405	0.06714
0.0671405	0.0671405	0.06714
0.0668364	0.0671405	0.06714
0.0668364	0.0671405	0.06714
0.0940032	0.0671405	0.09436
0.0671405	0.0671405	0.09436
0.0668364	0.0671405	0.06714
0.0671405	0.0671405	0.09436
0.06687	0.0671405	0.09436
0.0671218	0.0671405	0.09436
0.0668364	0.0943596	0.09436
0.145169	0.0671405	0.09436
0.0671405	0.0671405	0.09436
0.0671218	0.0671405	0.09436
0.0943596	0.0671405	0.06714
0.0671218	0.0671405	0.06714
0.243594	0.0671405	0.09436
0.0671405	0.0671405	0.06714
0.0671405	0.0671405	0.09436
0.0671405	0.0671405	0.09436
0.0671218	0.0671405	0.06714
0.0668364	0.0671405	0.10343
0.0668364	0.0671405	0.09436
0.0668364	0.0671405	0.06714
0.0668364	0.0671405	0.06714
0.0668364	0.0671405	0.06714
0.0668364	0.0671405	0.09436
0.0671218	0.248601	0.14517
0.0671405	0.0671405	0.06714
0.0671218	0.0671405	0.06714
0.0671405	0.0671405	0.09436
0.0671218	0.0671405	0.06714
0.0668364	0.0671405	0.09436
0.0671405	0.0671405	0.06714
0.0668364	0.0671405	0.06714
0.243594	0.0671405	0.06714
0.0671405	0.0671405	0.09436
0.0668364	0.0671405	0.06714
0.0671405	0.0671405	0.06714
0.0671405	0.0671405	0.09436
0.0671218	0.0671405	0.14517
0.0671405	0.0671405	0.09436
0.137021	0.0671405	0.14517
0.191477	0.0671405	0.09436
0.0671218	0.0671405	0.09436
0.0668364	0.0671405	0.09436
0.0671405	0.0671405	0.06714
0.0668364	0.0671405	0.09436
0.0671405	0.0671405	0.14517
0.17522	0.0671405	0.09436
0.0671405	0.0671405	0.06714
0.0668364	0.0671405	0.09436
0.0668364	0.0671405	0.06714
0.0668364	0.0671405	0.06714
0.0671405	0.176017	0.09436
0.0671218	0.0671405	0.06714
0.0671218	0.0671405	0.14517
0.0671218	0.0671405	0.06714
0.0668364	0.0671405	0.09436
0.0671218	0.0671405	0.06714
0.0668364	0.0671405	0.06714
0.0671405	0.0671405	0.45002
0.0668364	0.0671405	0.09436
0.0671405	0.0671405	0.09436
0.0671218	0.0671405	0.14517
0.0671405	0.0671405	0.14517
0.0671405	0.0671405	0.06714
0.0671405	0.0671405	0.09436
0.205928	0.145169	0.06714
0.0671405	0.0671405	0.06714
0.0943596	0.0671405	0.06714
0.0671218	0.0671405	0.09436
0.0671405	0.0671405	0.06714
0.0668364	0.0671405	0.20324
0.0671405	0.0671405	0.06714
0.175968	0.0671405	0.06714
0.243594	0.0671405	0.14517
0.0671218	0.0671405	0.06714
0.0671218	0.0671405	0.06714
0.0668364	0.0671405	0.06714
0.0668364	0.0671405	0.06714
0.0671405	0.0671405	0.09436
0.137021	0.0671405	0.09436
0.0671218	0.0671405	0.06714
0.0939322	0.0671405	0.14517
0.06687	0.0671405	0.06714
0.0671405	0.0671405	0.06714
0.0671218	0.0671405	0.14517
0.0671218	0.0671405	0.06714
0.0671405	0.0671405	0.06714
0.0671218	0.0671405	0.17602
0.0672692	0.0671405	0.09436
0.0671405	0.0671405	0.09436
0.145128	0.0671405	0.06714
0.0671405	0.0671405	0.09436
0.244904	0.0671405	0.06714
0.0671405	0.0671405	0.06714
0.0668364	0.0671405	0.09436
0.0671405	0.0671405	0.09436
0.0671218	0.0671405	0.09436
0.0671405	0.0671405	0.06714
0.0668364	0.0943596	0.09436
0.0668364	0.0671405	0.06714
0.0668364	0.0671405	0.06714
0.243594	0.0671405	0.09436
0.0671405	0.0671405	0.06714
0.0671405	0.0671405	0.14517
0.0671405	0.0671405	0.06714
0.0668364	0.0671405	0.09436
0.0671405	0.0671405	0.14517
0.243594	0.0671405	0.09436
0.0671405	0.0943596	0.06714
0.0668869	0.0671405	0.09436
0.243594	0.0671405	0.09436
0.144511	0.0671405	0.09436
0.0668364	0.0671405	0.09436
0.243594	0.0671405	0.14517
0.0671405	0.0671405	0.14517
0.0671405	0.0671405	0.14517
0.0671405	0.0671405	0.06714
0.243594	0.0671405	0.09436
0.0668364	0.0671405	0.09436
0.0668364	0.0671405	0.14517
0.0671218	0.0671405	0.06714
0.0671218	0.0671405	0.06714
0.0671405	0.0671405	0.06714
0.0668364	0.0671405	0.81294
0.248532	0.0671405	0.09436
0.0671405	0.0671405	0.09436
0.0671405	0.0943596	0.09436
0.0671405	0.0671405	0.06714
0.243594	0.0943596	0.06714
0.0668364	0.0671405	0.09436
0.0671405	0.0671405	0.09436
0.0671405	0.0671405	0.09436
0.06687	0.203236	0.09436
0.0671405	0.0671405	0.09436
0.0672692	0.0671405	0.06714
0.0943333	0.0671405	0.06714
0.0671218	0.0671405	0.09436
0.0671405	0.0671405	0.06714
0.0668364	0.0671405	0.14517
0.0671405	0.0671405	0.17602
0.0671405	0.0671405	0.09436
0.0671405	0.0671405	0.09436
0.0671405	0.0671405	0.14517
0.0668364	0.0671405	0.06714
0.0668364	0.0943596	0.09436
0.17522	0.0671405	0.09436
0.0668364	0.0671405	0.06714
0.0939322	0.0943596	0.09436
0.0668364	0.0671405	0.09436
0.0671405	0.0671405	0.09436
0.0671405	0.0671405	0.14517
0.0671218	0.0671405	0.09436
0.243594	0.0943596	0.09436
0.243594	0.0671405	0.14517
0.0671218	0.0671405	0.06714
0.0671218	0.0671405	0.14517
0.0668364	0.0671405	0.06714
0.0668364	0.0671405	0.09436
0.0671405	0.0671405	0.09436
0.0671405	0.0671405	0.09436
0.243594	0.0943596	0.09436
0.0943596	0.0671405	0.09436
0.243594	0.0671405	0.14517
0.0671405	0.0671405	0.06714
0.243594	0.0671405	0.06714
0.0671405	0.0671405	0.09436
0.0671218	0.0671405	0.09436
0.243594	0.0671405	0.06714
0.137021	0.0671405	0.09436
0.0671405	0.0671405	0.06714
0.0671405	0.0671405	0.06714
0.0671405	0.0943596	0.09436
0.0668869	0.0671405	0.06714
0.0671405	0.0671405	0.09436
0.0671218	0.0671405	0.09436
0.0668364	0.0671405	0.14517
0.0943333	0.0671405	0.06714
0.144511	0.0943596	0.09436
0.0668364	0.0671405	0.09436
0.0668364	0.0671405	0.06714
0.0671405	0.0671405	0.06714
0.247475	0.0671405	0.06714
0.0671405	0.0671405	0.06714
0.0671405	0.0671405	0.09436
0.0671218	0.0671405	0.17602
0.0672692	0.0943596	0.09436
0.0671218	0.0671405	0.09436
0.06687	0.0671405	0.14517
0.0943333	0.0671405	0.06714
0.0671218	0.0943596	0.09436
0.0943596	0.0671405	0.09436
0.0943596	0.0671405	0.09436
0.0671405	0.0671405	0.09436
0.0671405	0.0671405	0.06714
0.0939322	0.0671405	0.2486
0.243594	0.0671405	0.06714
0.0943333	0.0671405	0.06714
0.0668364	0.0671405	0.06714
0.0671405	0.0671405	0.09436
0.0939322	0.0671405	0.14517
0.0939322	0.0671405	0.06714
0.0668364	0.0671405	0.06714
0.0668364	0.0671405	0.06714
0.0671218	0.0943596	0.06714
0.0671405	0.0671405	0.09436
0.0668364	0.0671405	0.09436
0.0668364	0.0671405	0.09436
0.0671405	0.0671405	0.09436
0.0671218	0.0671405	0.09436
0.0671405	0.0671405	0.09436
0.243594	0.0671405	1.79646
0.0668364	0.0671405	0.06714
0.0671218	0.0671405	0.09436
0.0668364	0.0671405	0.06714
0.0671405	0.176017	0.09436
0.0671405	0.0671405	0.09436
0.0672692	0.0671405	0.14517
0.0671405	0.0671405	0.06714
0.0668364	0.0671405	0.09436
0.0671405	0.0671405	0.06714
0.0671405	0.0671405	0.2486
0.0671218	0.0671405	0.06714
0.0668364	0.0671405	0.06714
0.0668364	0.0671405	0.09436
0.0671218	0.0671405	0.06714
0.0671218	0.0671405	0.09436
0.0671405	0.0671405	0.09436
0.243594	0.0671405	0.06714
0.243594	0.0671405	0.09436
0.0668364	0.0671405	0.06714
0.0671405	0.0671405	0.14517
0.0671405	0.0671405	0.06714
0.0671405	0.0671405	0.06714
0.0668364	0.0671405	0.17602
0.06687	0.0671405	0.09436
0.0671405	0.0671405	0.09436
0.0671405	0.0671405	0.06714
0.0671405	0.0671405	0.09436
0.0943333	0.0671405	0.06714
0.0671405	0.0671405	0.09436
0.0671405	0.0671405	0.09436
0.0668364	0.0671405	0.06714
0.0671218	0.0671405	0.09436
0.0671405	0.0671405	0.06714
0.0939322	0.0671405	0.06714
0.0668364	0.0671405	0.06714
0.0672692	0.0671405	0.06714
0.0671405	0.0671405	0.09436
0.0671405	0.0671405	0.06714
0.0671218	0.0671405	0.09436
0.243594	0.0671405	0.06714
0.0943596	0.148798	0.06714
0.0671405	0.0943596	0.09436
0.0671218	0.0671405	0.06714
0.0668364	0.0671405	0.06714
0.0671405	0.0671405	0.06714
0.0671405	0.0943596	0.17602
0.0668364	0.0671405	0.17602
0.0943596	0.0671405	0.09436
0.0671405	0.0671405	0.06714
0.0668364	0.0671405	0.09436
0.0671405	0.0671405	0.06714
0.0671405	0.0943596	0.09436
0.243594	0.0671405	0.06714
0.0671218	0.0671405	0.06714
0.144511	0.0671405	0.09436
0.0943596	0.0671405	0.06714
0.0668364	0.0671405	0.14517
0.0668364	0.0671405	0.09436
0.0671405	0.0671405	0.06714
0.0668364	0.0671405	0.14517
0.0671405	0.0671405	0.09436
0.0671218	0.0671405	0.09436
0.145169	0.0671405	0.09436
0.0671218	0.0671405	0.09436
0.243594	0.0671405	0.06714
0.0668364	0.0671405	0.06714
0.0671405	0.0671405	0.09436
0.0671218	0.0671405	0.09436
0.0939322	0.145169	0.06714
0.0671218	0.0671405	0.09436
0.0668364	0.0671405	0.06714
0.243594	0.0671405	0.06714
0.0671405	0.0671405	0.09436
0.0943596	0.0671405	0.09436
0.0671405	0.0671405	0.09436
0.0668364	0.0671405	0.09436
0.0671405	0.0671405	0.06714
0.0671405	0.0671405	0.09436
0.0943333	0.0671405	0.09436
0.0668364	0.0671405	0.06714
0.0671405	0.0671405	0.09436
0.0668364	0.0943596	0.06714
0.0668364	0.0671405	0.06714
0.0671405	0.0671405	0.09436
0.0671218	0.0671405	0.14517
0.0668364	0.0671405	0.14517
0.0671218	0.0671405	0.06714
0.0671405	0.0943596	0.20324
0.0671405	0.0671405	0.06714
0.0671405	0.0671405	0.06714
0.0671218	0.0671405	0.14517
0.0939322	0.0943596	0.06714
0.0671218	0.0943596	0.09436
0.0668364	0.0671405	0.09436
0.0671405	0.0943596	0.2486
0.0668364	0.0671405	0.09436
0.0671405	0.0671405	0.20324
0.0671405	0.0671405	0.06714
0.0943333	0.0671405	0.06714
0.0671218	0.0671405	0.06714
0.0671405	0.0671405	0.09436
0.0671405	0.0671405	0.09436
0.0671405	0.0671405	0.06714
0.0668364	0.0671405	0.06714
0.144511	0.0671405	0.17602
0.0671405	0.0671405	0.09436
0.0671218	0.0671405	0.06714
0.444579	0.0671405	0.06714
0.0671405	0.0671405	0.06714
0.0943333	0.0671405	0.14517
0.0671218	0.0671405	0.06714
0.0671405	0.0671405	0.06714
0.0668364	0.0671405	0.09436
0.0671218	0.0671405	0.06714
0.319731	0.0671405	0.06714
0.0671405	0.0671405	0.06714
0.0671405	0.0671405	0.06714
0.0939322	0.0671405	0.09436
0.0671405	0.0671405	0.06714
0.0668364	0.0671405	0.06714
0.243594	0.0671405	0.06714
0.0671405	0.0671405	0.09436
0.0668364	0.0671405	0.06714
0.0671405	0.0671405	0.06714
0.0943596	0.0671405	0.14517
0.0671405	0.0671405	0.06714
0.0671405	0.0671405	0.06714
0.0939322	0.0943596	0.06714
0.0671405	0.0671405	0.09436
0.0671405	0.0671405	0.09436
0.0668364	0.0671405	0.09436
0.0671405	0.0671405	0.09436
0.137021	0.0671405	0.09436
0.0939322	0.0671405	0.06714
0.0671218	0.0671405	0.06714
0.0668364	0.0671405	0.09436
0.0671218	0.0671405	0.09436
0.0668364	0.0671405	0.14517
0.0671405	0.0671405	0.14517
0.243594	0.0671405	0.06714
0.0671405	0.0671405	0.06714
0.243594	0.0943596	0.06714
0.0668364	0.0671405	0.06714
0.06687	0.0671405	0.09436
0.0943596	0.0671405	0.06714
0.0668364	0.0671405	0.14517
0.0668364	0.0671405	0.09436
0.243594	0.0671405	0.06714
0.0668364	0.0671405	0.09436
0.0671405	0.0671405	0.09436
0.0671405	0.0671405	0.09436
0.137021	0.0671405	0.09436
0.0671405	0.0671405	0.14517
0.0943333	0.0671405	0.06714
0.0668364	0.0671405	0.06714
0.0939322	0.0671405	0.20324
0.0668364	0.0671405	0.14517
0.0668364	0.0671405	0.06714
0.0939322	0.0943596	0.09436
[truncated: 17,288 more rows]

## Sheet: Figure 3D
Area um2
0.00075295
0.00076664
0.00079402
0.00083509
0.00084878
0.00091723
0.00097199
0.00101
0.00101
0.00104
0.00107
0.00107
0.00107
0.00108
0.0011
0.00114
0.00116
0.00127
0.00134
0.00136
0.00136
0.00138
0.00155
0.00156
0.00162
0.00171
0.00181
0.00181
0.00193
0.00193
0.00199
0.00199
0.00207
0.00209
0.00229
0.00246
0.00249
0.00251
0.00261
0.00263
0.00266
0.00278
0.00278
0.00282
0.00285
0.00309
0.00311
0.00353
0.00396
0.00398
0.00409
0.00427
0.00456
0.00471
0.00496
0.005
0.00504
0.00568
0.00596
0.00622
0.00641
0.00645
0.00676
0.00686
0.00712
0.00765
0.00797
0.00805
0.00836
0.00939
0.01073
0.01082
0.01083
0.01216
0.01279
0.0135
0.01646
0.01646
0.01813
0.01962
0.01974
0.02095
0.02398
0.02444
0.03099
0.05727
0.0584
0.06397
0.06987
0.08896
0.09795
0.00109
0.00118
0.00127
0.00145
0.00154
0.00154
0.00163
0.00172
0.0019
0.0019
0.00208
0.00218
0.00227
0.00227
0.00236
0.00236
0.00245
0.00272
0.00281
0.0029
0.00308
0.00317
0.00326
0.00326
0.00335
0.00353
0.00353
0.00381
0.0039
0.00399
0.00417
0.00444
0.00453
0.00462
0.00471
0.0048
0.00489
0.00489
0.00508
0.00517
0.00517
0.00526
0.00535
0.00544
0.00553
0.00562
0.00571
0.0058
0.00616
0.00625
0.00634
0.00662
0.00671
0.00671
0.0068
0.00707
0.00725
0.00752
0.0077
0.0077
0.00779
0.00798
0.00834
0.00843
0.00915
0.00933
0.01024
0.01033
0.01079
0.01097
0.01124
0.01133
0.01187
0.01224
0.01305
0.01305
0.01305
0.01323
0.01468
0.01631
0.01677
0.01695
0.01794
0.01831
0.0203
0.02184
0.02646
0.02782
0.03498
0.03816
0.03834
0.11021
0.0007605
0.0007605
0.00080275
0.00080275
0.00080275
0.00080275
0.00080275
0.00080275
0.000845
0.000845
0.000845
0.000845
0.00088725
0.00088725
0.00088725
0.00088725
0.0009295
0.0009295
0.0009295
0.00097175
0.00101
0.00106
0.00106
0.00106
0.00106
0.0011
0.0011
0.0011
0.0011
0.00114
0.00114
0.00114
0.00114
0.00118
0.00118
0.00123
0.00127
0.00127
0.00131
0.00131
0.00131
0.00131
0.00131
0.00131
0.00131
0.00135
0.00139
0.00139
0.00139
0.00144
0.00148
0.00152
0.00152
0.00152
0.00156
0.00156
0.00156
0.00156
0.00161
0.00165
0.00169
0.00169
0.00169
0.00173
0.00173
0.00173
0.00173
0.00177
0.00177
0.0019
0.00194
0.00199
0.00203
0.00203
0.00203
0.00207
0.00207
0.00207
0.00207
0.00211
0.00215
0.0022
0.00224
0.00228
0.00228
0.00228
0.00232
0.00232
0.00232
0.00237
0.00241
0.00241
0.00241
0.00245
0.00245
0.00245
0.00245
0.00249
0.00249
0.00249
0.00249
0.00253
0.00253
0.00258
0.00258
0.00258
0.00258
0.00262
0.00262
0.00266
0.00266
0.00266
0.0027
0.0027
0.0027
0.00275
0.00275
0.00279
0.00283
0.00287
0.00292
0.00292
0.00292
0.00296
0.00296
0.003
0.00313
0.00317
0.00317
0.00321
0.00325
0.0033
0.0033
0.00338
0.00351
0.00351
0.00355
0.00355
0.00355
0.00359
0.00363
0.00368
0.00372
0.00372
0.00372
0.00376
0.00384
0.00389
0.00393
0.00393
0.00397
0.00397
0.00401
0.00406
0.00406
0.0041
0.00418
0.00422
0.00422
0.00427
0.00427
0.00431
0.00431
0.00439
0.00439
0.00448
0.00452
0.00456
0.00456
0.00461
0.00465
0.00469
0.00469
0.00469
0.00473
0.00486
0.00486
0.00486
0.00494
0.00499
0.00507
0.00511
0.00515
0.0052
0.00524
0.00524
0.00524
0.00528
0.00532
0.00541
0.00541
0.00545
0.00558
0.00562
0.00583
0.00583
0.00592
0.00592
0.006
0.00604
0.00608
0.00613
0.00621
0.00638
0.00638
0.00638
0.00642
0.00642
0.00646
0.00651
0.00655
0.00668
0.00668
0.00684
0.00689
0.00693
0.00722
0.00735
0.00735
0.00739
0.00756
0.00765
0.00773
0.0079
0.00794
0.00799
0.00803
0.00811
0.00811
0.00824
0.00824
0.00828
0.00845
0.00853
0.00858
0.0087
0.00875
0.00879
0.00887
0.00908
0.00917
0.00921
0.00925
0.00929
0.00929
0.00938
0.00942
0.00955
0.00959
0.00968
0.00989
0.0106
0.01073
0.01082
0.01086
0.01103
0.01111
0.01124
0.01124
0.01145
0.0117
0.01196
0.012
0.01217
0.01221
0.01234
0.01238
0.01272
0.01284
0.01301
0.01327
0.01344
0.0136
0.01411
0.01411
0.01453
0.01462
0.015
0.01525
0.01529
0.01534
0.01534
0.01551
0.01589
0.01635
0.01652
0.01656
0.01665
0.01694
0.01846
0.01846
0.01863
0.01969
0.01986
0.02129
0.02438
0.02594
0.02662
0.03055
0.03203
0.03207
0.03219
0.03232
0.03236
0.03494
0.03511
0.03676
0.03752
0.03938
0.04115
0.04238
0.0439
0.04593
0.05264
0.05704
0.06684
0.06975
0.10233
0.17487

## Sheet: Figure 3E
High force	Low force
13.889	47.5216
15.1571	53.0239
15.237	45.7957
13.8606	58.973
13.0229	45.9693
13.9455	47.0873
12.9717	46.6494
12.5968	45.5518
13.2088	44.268
14.5676	43.75
13.0093	46.284
13.3433	45.6464
13.0862	44.8288
15.5	64.8704
13.4741	47.0705
12.792	44.5866
13.4168	45.6168
13.886	47.6493
13.1105	45.2556
13.586	47.479
13.4738	43.8119
14.1487	46.7905
12.7554	46.2652
12.8531	47.1374
13.4417	48.9171
13.8113	48.0581
13.6252	46.914
13.7287	47.1243
12.4255	46.338
13.6809	43.5938
14.4831	46.6446
14.4153	48.3521
12.4996	46.3476
12.7492	44.413
12.8296	43.12
13.2084	47.577
13.3075	46.7398
12.6195	45.9648
12.9277	47.1184
13.8796	46.5254
12.7238	45.8959
13.391	46.788
14.1737	45.8923
14.6616	46.7488
13.7142	47.7968
12.9291	44.4534
13.756	45.3799
14.6273	55.5237
13.811	46.2596
14.1667	45.869
13.3	46.7331
14.0147	47.4622
13.5368	46.219
12.517	48.995
12.6415	47.5241
12.9189	48.0449
14.6388	45.6831
13.6584	44.5455
13.6958	47.18
14.4493	47.0495
12.5446	46.5024
13.2898	45.8984
13.3072	46.5525
15.6046	46.464
13.5821	45.6725
13.1305	44.7608
13.0579	48.953
6.18978	48.9863
6.26177	48.9964
13.0327	46.2244
13.2683	46.1
6.08825	48.3328
13.4553	46.3868
13.9058	49.5107
12.8692	49.2481
16.4426	46.8989
16.2154	46.9078
15.9716	45.4457
15.9299	46.1728
17.5953	45.57
19.1794	44.9355
15.8034	46.3663
17.559	46.3812
17.7207	45.5
15.8191	46.8093
16.5293	48.5416
16.4553	45.2315
16.7756	45.5252
17.9094	46.2974
16.2744	44.553
16.3951	43.624
15.8874	46.48
16.9585	50.288
15.6193	45.3664
16.4548	42.2652
16.8213	46.2974
16.6123	50.0732
16.7859	47.7016
16.4762	48.9028
16.048	48.125
18.1105
17.4464
15.2347
15.2443
16.5282
17.1183
17.5392
15.465
14.968
17.4229
15.0168
18.4752
17.6081
15.0435
17.8306
16.7547
16.7096
17.225
21.3552
15.7127
17.5794
16.3312
17.3157
16.4285
16.1501
16.2326
16.8911
16.8363
16.1759
16.3274
16.917
15.8154
16.248
17.7078
16.787
15.9184
15.5157
16.4185
17.0304
16.0599
15.9026
16.1576
