# Supplementary material for: Structural organization and dynamics of FCHo2 docking on membranes
Source: eLife. 2022 Jan 19;11:e73156. doi: 10.7554/eLife.73156 (PMC8798043; doi:10.7554/eLife.73156)
Supplement: Figure 4—source data 1. [file elife-73156-fig4-data1.xlsx]

## Sheet: Figure 4D
Distance (nm)
22.5
23.75
22.5
21.25
22.525
22.65
22.5
18.75
22.5
21.275
20.15
20.15
22.5
15.55
22.65
20.625
22.5
22.5
26.25
25
31.75
27.5
27.5
22.5
27.5
30
30
22.5
25
27.5
22.5
25
29.25
36.25
29
42.5
34.5
43.75
45
46.5
38.75
34.75
53.5
55.75
51.5
43.25
37
26.75
31
47.5
39.25
41.25
41.25
30
27.5
22.5
27.5
22.5
27.5
22.5
25
27.5
25
27.5
25
33
32.75
25.5
35.25
37.5
36.25
35.25
45
43.75
32.25
35.75
37
49.5
47.5
50
39.25
33
41.25
37
39.25
27
24
28
37
29
29
25
39.25
37
33
35
37
33
41.25
31
31
31
39.25
26.75
31
35
43.25

## Sheet: Feuil1
Time (s)
197.342
74.4908
74.4908
109.79
66.5933
208.797
208.797
41.237
10.4699
48.9372
43.2042
176.824
7.29456
10.537
39.0078
153.731
46.0793
97.5031
42.127
200.498
18.0079
86.1908
122.46
138.842
49.9746
23.4
153.692
124.02
63.18
69.42
67.0979
78.8416
49.9262
31.2094
54.6889
35.1343
9.39276
42.12
129.538
78.7956
72.6445
22.6738
103.752
136.58
65.5941
91.2896
122.462
71.7772
47.6377
159.15
108.423
99.4018
11.52
94.7138
87.8515
52.565
20.8922
45.3658
119.52
105.12
234.76
86.4122
93.6
175.704
217.483
286.564
290.894
25.9603
69.2546
37.4674
224.644
198.804
181.463
15.84
182.88
236.2
43.2
228.964
43.2238
18.72
433.44
620.775
44.663
36
66.3026
113.769
195.888
177.12
185.782
175.704
141.237
246.257
72.0144
216.005
201.729
172.95
220.325
38.9866
157.066
