# Supplementary figures and images for: Structural organization and dynamics of FCHo2 docking on membranes
Source: eLife journal article supplement (doi:10.7554/elife.73156), 2022-01-19

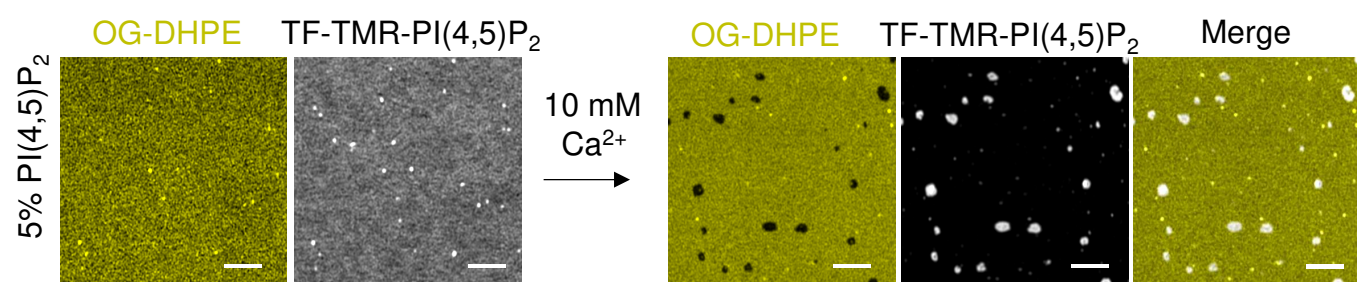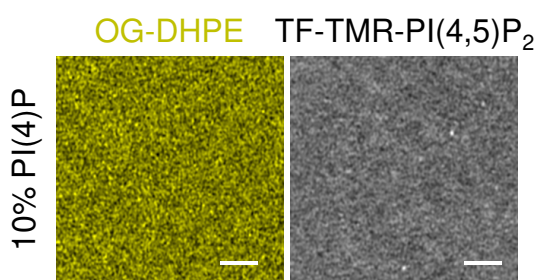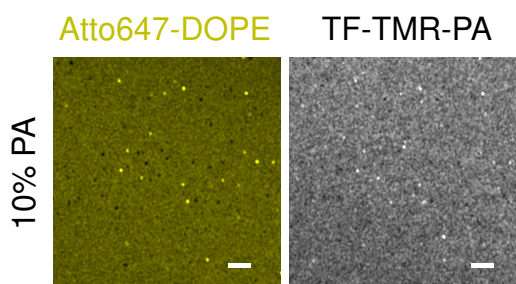

Supplement: supp [file elife_poa_e73156_Figure_1_figure_supplement_1.pdf › elife_poa_e73156_Figure_1_figure_supplement_1.pdf]

Membrane sheets functional assay  
*Front view*

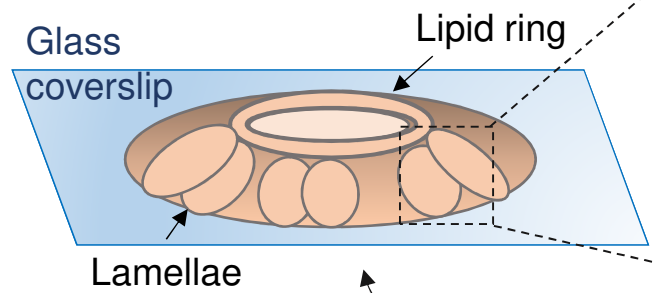

2  $\mu$ M  
FCHo2-Alexa647

Lipids

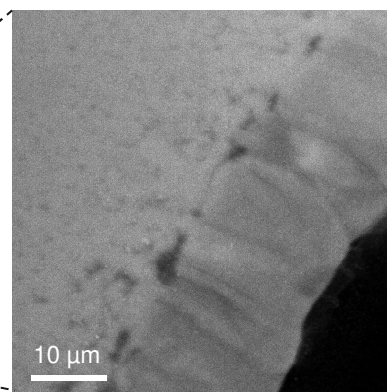

FCHo2

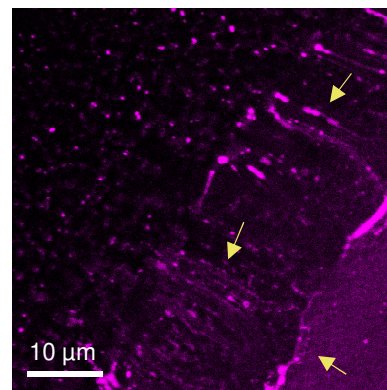

Merge

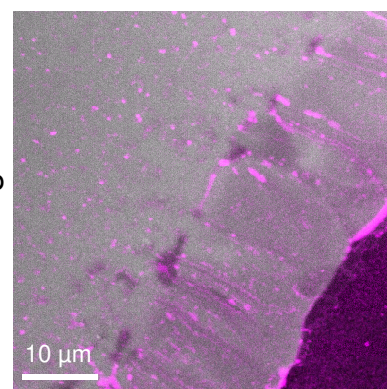

Supplement: supp [file elife_poa_e73156_Figure_1_figure_supplement_2.pdf › elife_poa_e73156_Figure_1_figure_supplement_2.pdf]

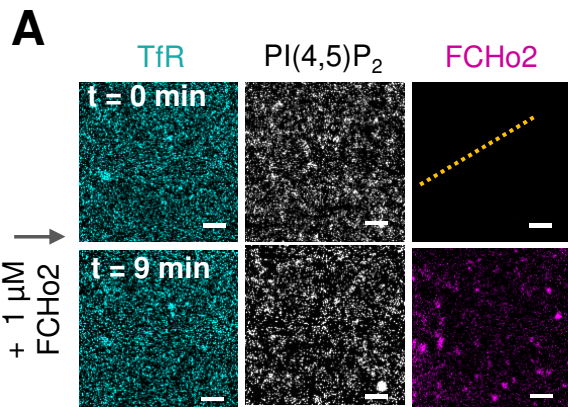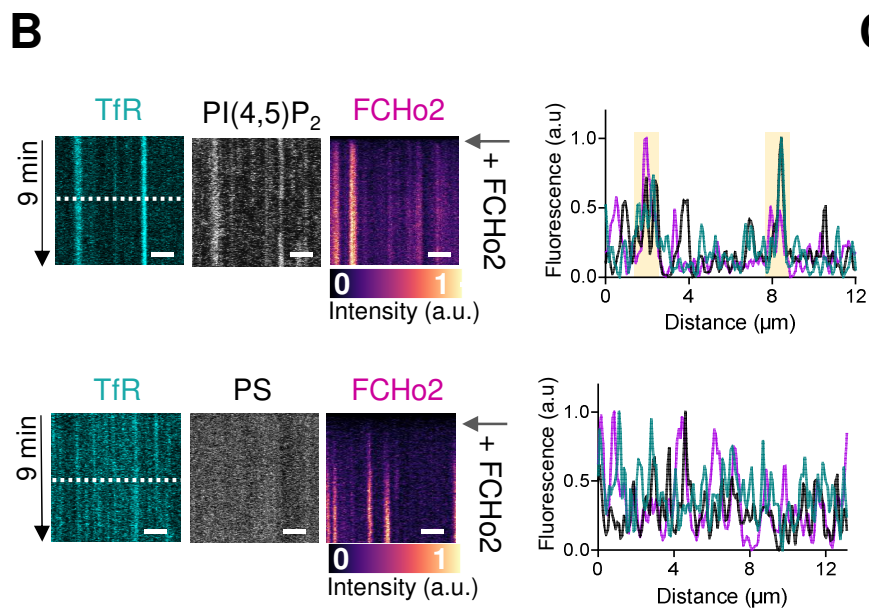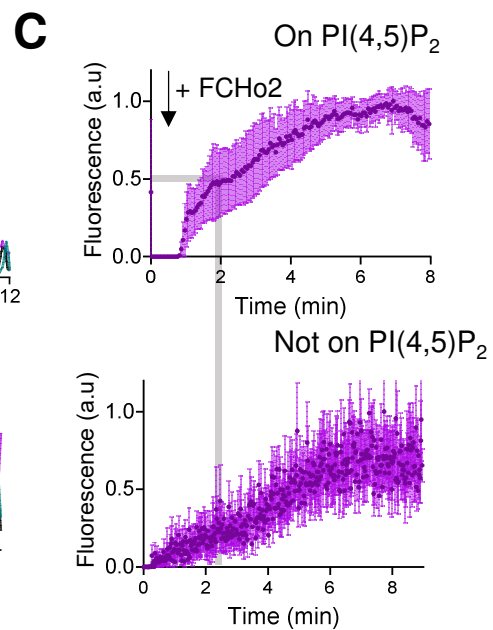

Supplement: supp [file elife_poa_e73156_Figure_1_figure_supplement_3.pdf › elife_poa_e73156_Figure_1_figure_supplement_3.pdf]

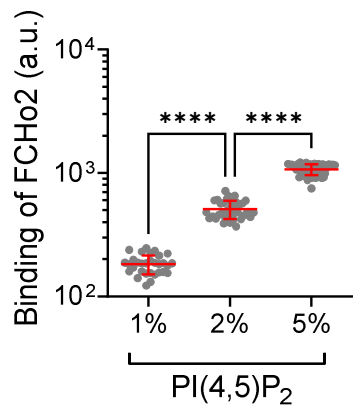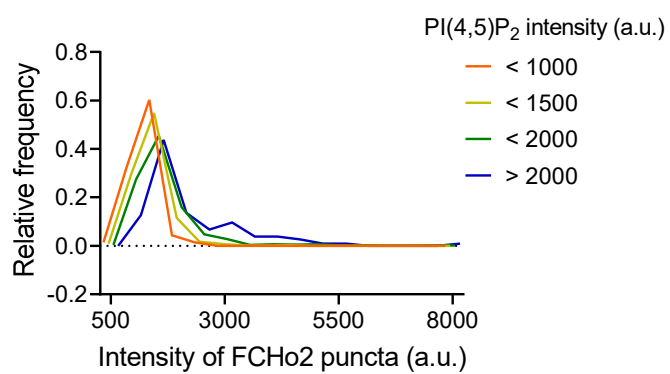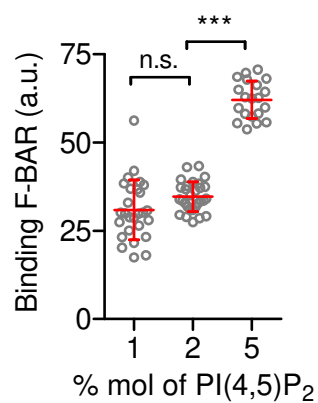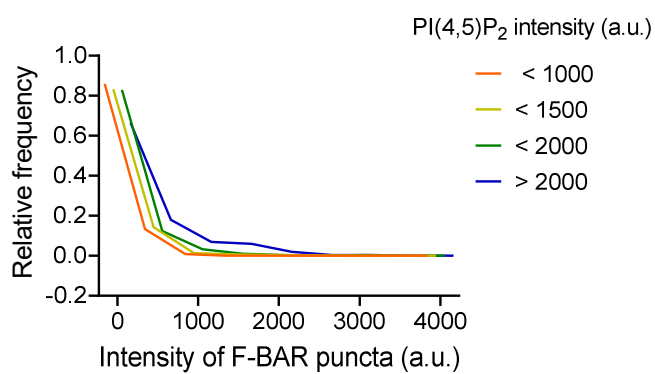

Supplement: supp [file elife_poa_e73156_Figure_1_figure_supplement_4.pdf › elife_poa_e73156_Figure_1_figure_supplement_4.pdf]

**A**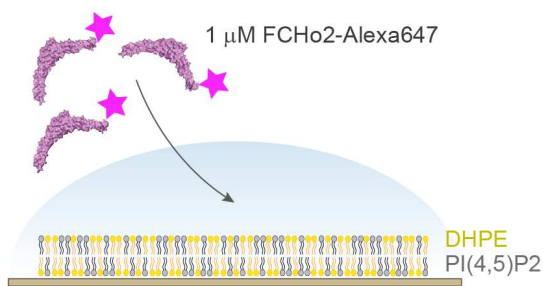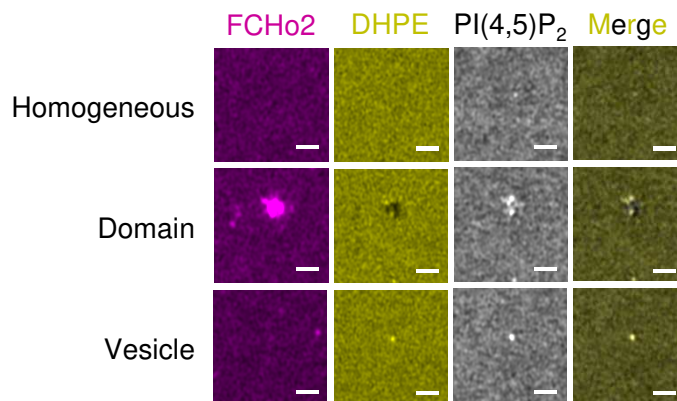**B**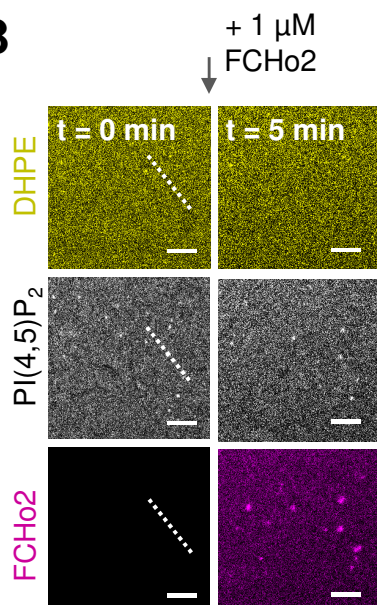**C**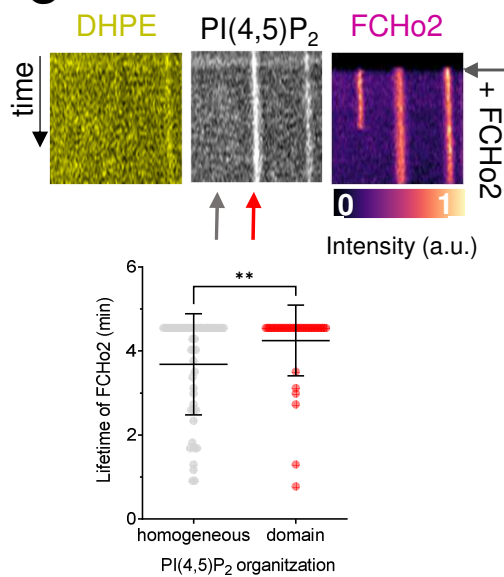

Supplement: supp [file elife_poa_e73156_Figure_1_figure_supplement_5.pdf › elife_poa_e73156_Figure_1_figure_supplement_5.pdf]

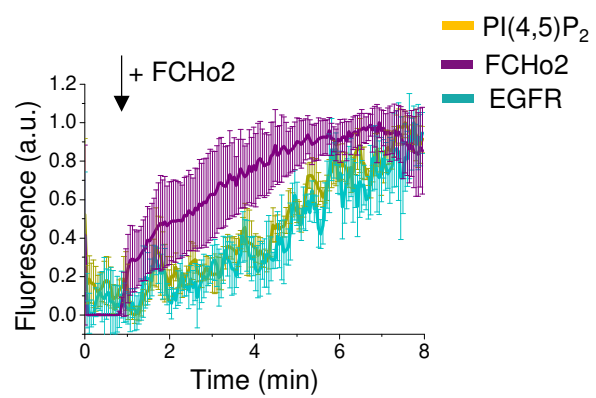

Supplement: supp [file elife_poa_e73156_Figure_1_figure_supplement_6.pdf › elife_poa_e73156_Figure_1_figure_supplement_6.pdf]

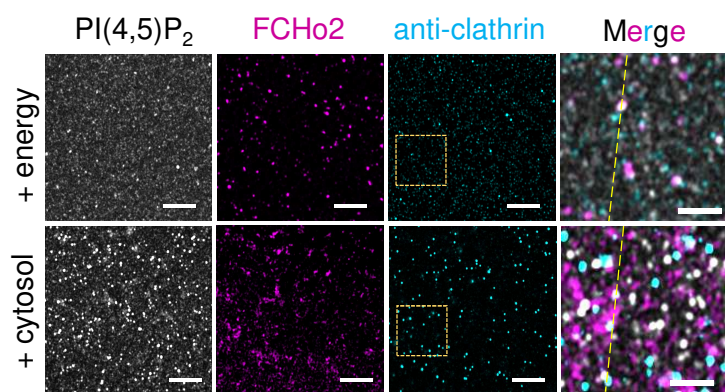

— PI(4,5)P<sub>2</sub> — FCHo2 — Clathrin

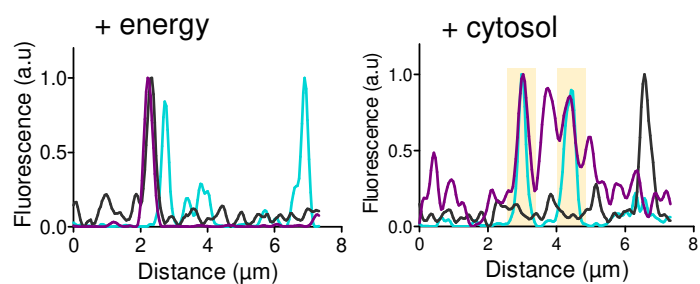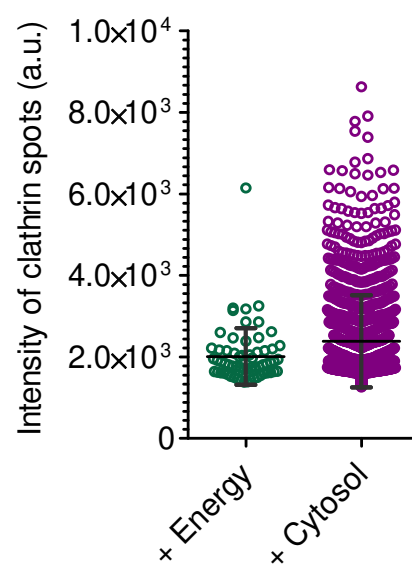

Supplement: supp [file elife_poa_e73156_Figure_2_figure_supplement_1.pdf › elife_poa_e73156_Figure_2_figure_supplement_1.pdf]

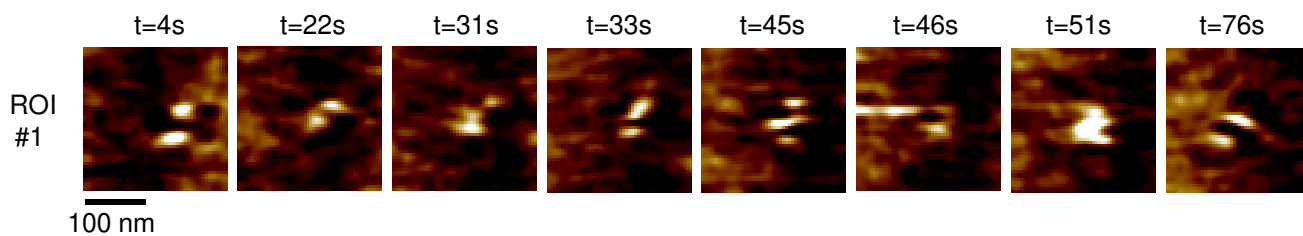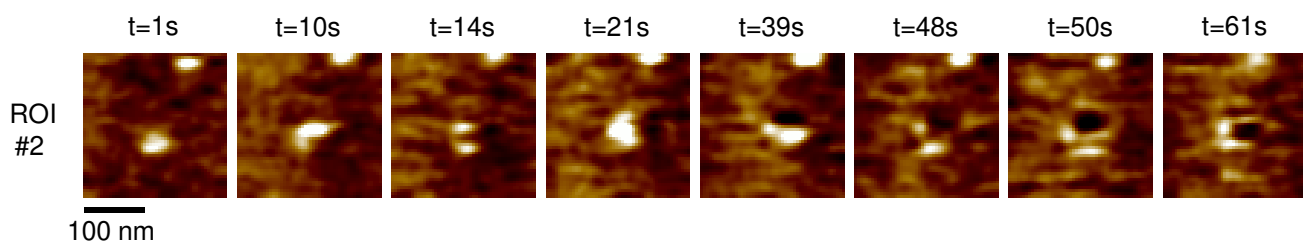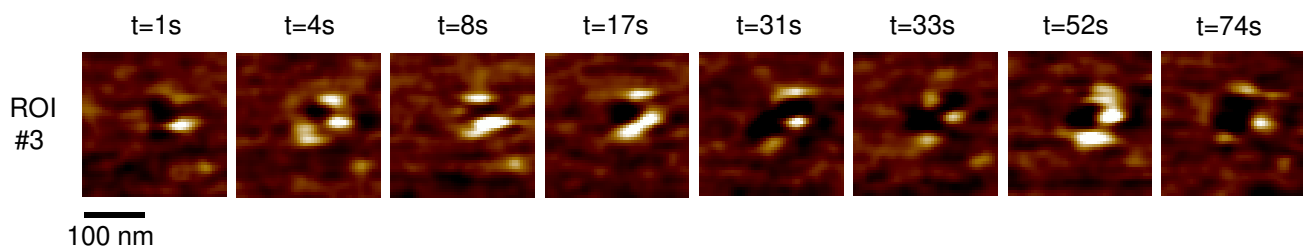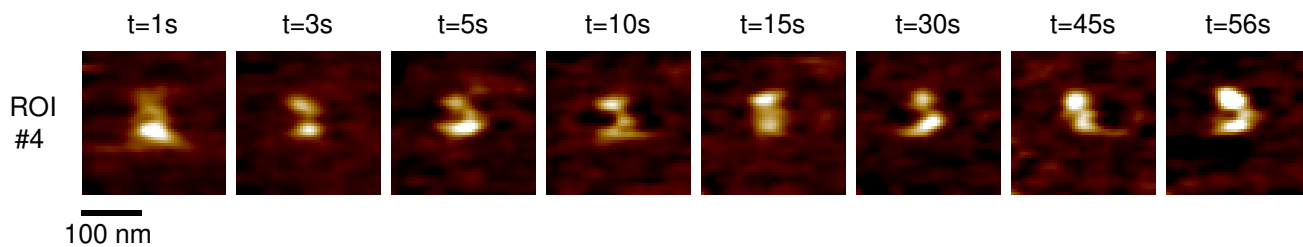

Supplement: supp [file elife_poa_e73156_Figure_4_fiigure_supplement_1.pdf › elife_poa_e73156_Figure_4_fiigure_supplement_1.pdf]
